# Supplementary material for: A Comprehensive Genetic Analysis of Candidate Genes Regulating Response to Trypanosoma congolense Infection in Mice
Source: PLoS Negl Trop Dis. 2010 Nov 9;4(11):e880. doi: 10.1371/journal.pntd.0000880 (PMC2976683; doi:10.1371/journal.pntd.0000880)
Supplement: Data S1 — AnnotatedFunctionalSNP.xls. A comprehensive annotation of publicly available SNP (NCBI build 37) across QTL regions including Polyphen annotation. (1.97 MB XLS) [file pntd.0000880.s001.xls]

## Sheet: Tir1_annotated
SNP downloaded from Ensembl Build 37. nsSNP have been annotated using the POLYPHEN tool (Ramensky et al, 2002). SNP have been characterised as either: 'benign', 'possibly damaging', or 'probably damaging'. POLYPHEN did not return a result in all cases. nsSNP genotypes have been updated from 454 sequence data (Mmu17:30637691..36837814) where sequence depth > 8X and the Newbler Mapper score = '64'.…
Locus	Variation ID	Chromosome name	position	Allele	C57	AJ	BALBc	C3H	Ensembl Gene ID	Ensembl Transcript ID	ext id	Consequence to transcript	phastCons	PolyphenConsequence	PolyphenStat	description	Peptide shift	Variation start in translation (aa)	Geneotype correlates with phenotype
	ss159824327	17	30664436		G		A		ENSMUSG00000062202		Btbd9		<0.1			BTB/POZ domain-containing protein 9 [Source:UniProtKB/Swiss-Prot;Acc:Q8C726]			TRUE
	ss159816288	17	30667147		T	C	C	C	ENSMUSG00000062202		Btbd9		0.999			BTB/POZ domain-containing protein 9 [Source:UniProtKB/Swiss-Prot;Acc:Q8C726]			TRUE
	Sudbery et al 2009	17	30772540	C/T	C		T		ENSMUST00000035963	ENSMUSG00000033826	MGI107714	NON_SYNONYMOUS_CODING	<0.1			dynein, axonemal, heavy chain 8 Gene [Source:MGI Symbol;Acc:MGI:107714]	S/F		TRUE
	ss159824546	17	30786666		A		G		ENSMUSG00000033826		Dnahc8		0.365			"Dynein heavy chain 8			TRUE
	ss159824612	17	30841652		C		T		ENSMUSG00000033826		Dnahc8		<0.1			"Dynein heavy chain 8			TRUE
	ss159824625	17	30849242		A		C		ENSMUSG00000033826		Dnahc8		0.997			"Dynein heavy chain 8			TRUE
	rs45958159	17	31013961	G/A	T				ENSMUSG00000054148	ENSMUST00000066999		REGULATORY_REGION	<0.1						TRUE
	ss159824894	17	31046212		G		A		ENSMUSG00000024027		Glp1r		0.434			Glucagon-like peptide 1 receptor Precursor (GLP-1 receptor)(GLP-1-R)(GLP-1R) [Source:UniProtKB/Swiss-Prot;Acc:O35659]			TRUE
	rs6348830	17	31100080	C/T	C	C	C	C	ENSMUSG00000073427	ENSMUST00000097355	AC165951.3-2	NON_SYNONYMOUS_CODING	<0.1	benign	?	Putative uncharacterized protein [Source:UniProtKB/TrEMBL;Acc:Q3UUQ9]	G/S	22	FALSE
	rs6348834	17	31100086	T/G	T	T	T	T	ENSMUSG00000073427	ENSMUST00000097355	AC165951.3-2	NON_SYNONYMOUS_CODING	<0.1	benign	?	Putative uncharacterized protein [Source:UniProtKB/TrEMBL;Acc:Q3UUQ9]	T/P	20	FALSE
	Sudbery et al 2009	17	31108861	G/A	G			A	ENSMUST00000087861	ENSMUSG00000054134	MGI1929785	NON_SYNONYMOUS_CODING	<0.1	benign	0.906	uromodulin-like 1 Gene [Source:MGI Symbol;Acc:MGI:1929785]	V/I		TRUE
	ss159816509	17	31110683	A/G	A	G			ENSMUSG00000054134	ENSMUST00000066554	Umodl1	NON_SYNONYMOUS_CODING	<0.1	benign	0.193	Uromodulin-like 1 Precursor (Olfactorin) [Source:UniProtKB/Swiss-Prot;Acc:Q5DID3]	R/G	280	TRUE
	ss159816509	17	31110683	A/G	A	G			ENSMUSG00000054134	ENSMUST00000114555	Umodl1	NON_SYNONYMOUS_CODING	<0.1	benign	0.193	Uromodulin-like 1 Precursor (Olfactorin) [Source:UniProtKB/Swiss-Prot;Acc:Q5DID3]	R/G	280	TRUE
	rs6280490	17	31117439	G/A	G	G	G	G	ENSMUSG00000054134	ENSMUST00000066554	Umodl1	NON_SYNONYMOUS_CODING	<0.1	benign	0.125	Uromodulin-like 1 Precursor (Olfactorin) [Source:UniProtKB/Swiss-Prot;Acc:Q5DID3]	G/D	353	FALSE
	rs6280490	17	31117439	G/A	G	G	G	G	ENSMUSG00000054134	ENSMUST00000114555	Umodl1	NON_SYNONYMOUS_CODING	<0.1	benign	0.125	Uromodulin-like 1 Precursor (Olfactorin) [Source:UniProtKB/Swiss-Prot;Acc:Q5DID3]	G/D	353	FALSE
	Sudbery et al 2009	17	31246505	C/T	C				ENSMUST00000024829	ENSMUSG00000024030	MGI107704	SYNONYMOUS_CODING	1			ATP-binding cassette, sub-family G (WHITE), member 1 Gene [Source:MGI Symbol;Acc:MGI:107704]	N		TRUE
	Sudbery et al 2009	17	31249930	C/T	C				ENSMUST00000024829	ENSMUSG00000024030	MGI107704	SYNONYMOUS_CODING	1			ATP-binding cassette, sub-family G (WHITE), member 1 Gene [Source:MGI Symbol;Acc:MGI:107704]	F		TRUE
	rs50406893	17	31299630	G/A		G	G	G	ENSMUSG00000024032	ENSMUST00000024831	Tff1	NON_SYNONYMOUS_CODING	<0.1	benign	0.029	Trefoil factor 1 Precursor (pS2 protein) [Source:UniProtKB/Swiss-Prot;Acc:Q08423]	H/Y	73	TRUE
	rs46949499	17	31299723	T/C		T	T	T	ENSMUSG00000024032	ENSMUST00000024831	Tff1	NON_SYNONYMOUS_CODING	<0.1	benign	0.315	Trefoil factor 1 Precursor (pS2 protein) [Source:UniProtKB/Swiss-Prot;Acc:Q08423]	I/V	42	TRUE
	rs47954064	17	31301893	C/T		C	C	C	ENSMUSG00000024032	ENSMUST00000024831		NON_SYNONYMOUS_CODING	<0.1				A/T	25	TRUE
	rs47954064	17	31301893	C/T		C	C	C	ENSMUSG00000024032	ENSMUST00000024831		REGULATORY_REGION	<0.1						TRUE
	rs46421462	17	31301904	G/A		G	A	G	ENSMUSG00000024032	ENSMUST00000024831	Tff1	NON_SYNONYMOUS_CODING	<0.1	benign	1.042	Trefoil factor 1 Precursor (pS2 protein) [Source:UniProtKB/Swiss-Prot;Acc:Q08423]	A/V	21	TRUE
	ss159825425	17	31326130	T/C	T		C		ENSMUSG00000024034	ENSMUST00000114549	Tmprss3	NON_SYNONYMOUS_CODING	0.965	benign	0.734	Transmembrane protease, serine 3 (EC 3.4.21.-) [Source:UniProtKB/Swiss-Prot;Acc:Q8K1T0]	I/V	268	TRUE
	ss159825425	17	31326130	T/C	T		C		ENSMUSG00000024034	ENSMUST00000024833	Tmprss3	NON_SYNONYMOUS_CODING	0.965	benign	0.678	Transmembrane protease, serine 3 (EC 3.4.21.-) [Source:UniProtKB/Swiss-Prot;Acc:Q8K1T0]	I/V	246	TRUE
	ss159816753	17	31328011		G	A	A	A	ENSMUSG00000024034		Tmprss3		<0.1			"Transmembrane protease			TRUE
	Sudbery et al 2009	17	31330963	G/A	G	A		A	ENSMUST00000024833	ENSMUSG00000024034	Tmprss3-001	SYNONYMOUS_CODING	0.995			transmembrane protease, serine 3 Gene [Source:MGI (curated);Acc:Tmprss3-001]	F		TRUE
	ss159816784	17	31368387	G/A	G	A	A	A	ENSMUSG00000042345	ENSMUST00000048656	Ubash3a	NON_SYNONYMOUS_CODING	0.998	benign	0.133	ubiquitin associated and SH3 domain containing, A [Source:RefSeq peptide;Acc:NP_808491]	V/I	364	TRUE
	rs46273257	17	31374865	C/A	C	C	C	C	ENSMUSG00000042345	ENSMUST00000048656	Ubash3a	NON_SYNONYMOUS_CODING	0.158	benign	1.328	ubiquitin associated and SH3 domain containing, A [Source:RefSeq peptide;Acc:NP_808491]	A/D	518	FALSE
	ss159817071	17	31522360	C/T	C	T		T	ENSMUSG00000041119	ENSMUST00000047168		REGULATORY_REGION	0.616						TRUE
	ss159817181	17	31571310	T/C	T	C		C	ENSMUSG00000053280	ENSMUST00000065610	AC166172.1	NON_SYNONYMOUS_CODING	<0.1	benign	?	Putative uncharacterized protein [Source:UniProtKB/TrEMBL;Acc:Q8CB29]	T/A	14	TRUE
	rs13465770	17	31606805	C/T	C	C	C	C	ENSMUSG00000041119	ENSMUST00000047168	Pde9a	NON_SYNONYMOUS_CODING	<0.1	probably damaging	2.533	High affinity cGMP-specific 3',5'-cyclic phosphodiesterase 9A (EC 3.1.4.35) [Source:UniProtKB/Swiss-Prot;Acc:O70628]	P/S	414	FALSE
	rs13467648	17	31664987	C/T	C	C	C	C	ENSMUSG00000024038	ENSMUST00000046288	Ndufv3	NON_SYNONYMOUS_CODING	<0.1	possibly damaging	1.557	NADH dehydrogenase [ubiquinone] flavoprotein 3, mitochondrial Precursor (NADH-ubiquinone oxidoreductase 9 kDa subunit)(Complex I-9kD)(CI-9kD) [Source:UniProtKB/Swiss-Prot;Acc:Q8BK30]	T/I	302	FALSE
	ss159817210	17	31756172		G	A			ENSMUSG00000024039		Cbs		<0.1			Cystathionine beta-synthase (EC 4.2.1.22)(Serine sulfhydrase)(Beta-thionase) [Source:UniProtKB/Swiss-Prot;Acc:Q91WT9]			TRUE
	Sudbery et al 2009	17	31817951	C/T	C		T		ENSMUST00000114502	ENSMUSG00000024041	MGI88515	SYNONYMOUS_CODING	0.998			crystallin, alpha A Gene [Source:MGI Symbol;Acc:MGI:88515]	S		TRUE
	ss159817624	17	31984061		T	C	C	C	ENSMUSG00000024042		Snf1lk		<0.1			Serine/threonine-protein kinase SNF1-like kinase 1 (Serine/threonine-protein kinase SNF1LK)(EC 2.7.11.1)(HRT-20)(Myocardial SNF1-like kinase)(Salt-inducible kinase 1)(SIK-1)(SIK1) [Source:UniProtKB/Swiss-Prot;Acc:Q60670]			TRUE
	ss159817626	17	31985677		T	C			ENSMUSG00000024042		Snf1lk		<0.1			Serine/threonine-protein kinase SNF1-like kinase 1 (Serine/threonine-protein kinase SNF1LK)(EC 2.7.11.1)(HRT-20)(Myocardial SNF1-like kinase)(Salt-inducible kinase 1)(SIK-1)(SIK1) [Source:UniProtKB/Swiss-Prot;Acc:Q60670]			TRUE
	rs46515140	17	31986457	G/A	G	G	G	G	ENSMUSG00000024042	ENSMUST00000024839		SPLICE_SITE,INTRONIC	0.112						FALSE
	ss159817637	17	31991185		A	G	G	G	ENSMUSG00000024042		Snf1lk		0.788			Serine/threonine-protein kinase SNF1-like kinase 1 (Serine/threonine-protein kinase SNF1LK)(EC 2.7.11.1)(HRT-20)(Myocardial SNF1-like kinase)(Salt-inducible kinase 1)(SIK-1)(SIK1) [Source:UniProtKB/Swiss-Prot;Acc:Q60670]			TRUE
	ss159825949	17	32188751		G	A	A	A	ENSMUSG00000058392		Rrp1b		<0.1			Ribosomal RNA processing protein 1 homolog B (RRP1-like protein B) [Source:UniProtKB/Swiss-Prot;Acc:Q91YK2]			TRUE
	Sudbery et al 2009	17	32188751	G/A	G	A	A	A	ENSMUST00000081339	ENSMUSG00000058392	Rrp1b-001	SYNONYMOUS_CODING	<0.1			ribosomal RNA processing 1 homolog B (S. cerevisiae) Gene [Source:MGI (curated);Acc:Rrp1b-001]	T		TRUE
	rs13467826	17	32193675	C/T	C	C	C	C	ENSMUSG00000058392	ENSMUST00000081339	Rrp1b	NON_SYNONYMOUS_CODING	<0.1	benign	0.2	Ribosomal RNA processing protein 1 homolog B (RRP1-like protein B) [Source:UniProtKB/Swiss-Prot;Acc:Q91YK2]	P/L	417	FALSE
	Sudbery et al 2009	17	32213538	T/C	T	C			ENSMUST00000002868	ENSMUSG00000002791		NON_SYNONYMOUS_CODING	0.946	possibly damaging	1.58		R/G		TRUE
	rs49496939	17	32213538	T/C	T	T	T	T	ENSMUSG00000002791	ENSMUST00000002868	CT033797.5	NON_SYNONYMOUS_CODING	0.946	possibly damaging	1.58	cytochrome P450, family 2, subfamily E, polypeptide 2 homolog [Source:RefSeq peptide;Acc:NP_796281]	R/G	297	FALSE
	Sudbery et al 2009	17	32213572	C/T	C	T			ENSMUST00000002868	ENSMUSG00000002791		SYNONYMOUS_CODING	0.986				P		TRUE
	Sudbery et al 2009	17	32213597	C/G	C	G			ENSMUST00000002868	ENSMUSG00000002791		NON_SYNONYMOUS_CODING	<0.1	possibly damaging	1.798		R/T		TRUE
	Sudbery et al 2009	17	32213908	C/T	C			T	ENSMUST00000002868	ENSMUSG00000002791		SYNONYMOUS_CODING	0.961				A		TRUE
	rs50925153	17	32213934	C/T	C	T	C	T	ENSMUSG00000002791	ENSMUST00000002868	CT033797.5	NON_SYNONYMOUS_CODING	0.717	benign	0.325	cytochrome P450, family 2, subfamily E, polypeptide 2 homolog [Source:RefSeq peptide;Acc:NP_796281]	V/I	265	FALSE
	Sudbery et al 2009	17	32213944	A/G	A	G			ENSMUST00000002868	ENSMUSG00000002791		SYNONYMOUS_CODING	0.517				A		TRUE
	rs51201089	17	32215788	C/T	C		C	T	ENSMUSG00000002791	ENSMUST00000002868	CT033797.5	NON_SYNONYMOUS_CODING	0.537	benign	0.132	cytochrome P450, family 2, subfamily E, polypeptide 2 homolog [Source:RefSeq peptide;Acc:NP_796281]	V/I	228	FALSE
	rs49095716	17	32215855	G/A	G	G	G	G	ENSMUSG00000002791	ENSMUST00000002868	0	SPLICE_SITE,INTRONIC	0.361	0	0	0			FALSE
	ss159818089	17	32218534	C/T	C	T		T	ENSMUSG00000002791	ENSMUST00000002868	0	SPLICE_SITE,INTRONIC	0.608	0	0	0			TRUE
	rs49377730	17	32259165	A/G	A	A	A	A	ENSMUSG00000038146	ENSMUST00000087723	Notch3	NON_SYNONYMOUS_CODING	0.992	possibly damaging	1.575	Neurogenic locus notch homolog protein 3 Precursor (Notch 3) [Contains Notch 3 extracellular truncation;Notch 3 intracellular domain] [Source:UniProtKB/Swiss-Prot;Acc:Q61982]	L/P	2186	FALSE
	rs47360897	17	32259178	C/T	C	C	C	C	ENSMUSG00000038146	ENSMUST00000087723	Notch3	NON_SYNONYMOUS_CODING	0.42	possibly damaging	1.8	Neurogenic locus notch homolog protein 3 Precursor (Notch 3) [Contains Notch 3 extracellular truncation;Notch 3 intracellular domain] [Source:UniProtKB/Swiss-Prot;Acc:Q61982]	G/R	2182	FALSE
	rs46598010	17	32259200	C/A	C	C	C	C	ENSMUSG00000038146	ENSMUST00000087723	Notch3	NON_SYNONYMOUS_CODING	0.968	benign	1.35	Neurogenic locus notch homolog protein 3 Precursor (Notch 3) [Contains Notch 3 extracellular truncation;Notch 3 intracellular domain] [Source:UniProtKB/Swiss-Prot;Acc:Q61982]	R/S	2174	FALSE
	rs48448440	17	32259258	C/G	C	C	C	C	ENSMUSG00000038146	ENSMUST00000087723	Notch3	NON_SYNONYMOUS_CODING	0.992	benign	1.35	Neurogenic locus notch homolog protein 3 Precursor (Notch 3) [Contains Notch 3 extracellular truncation;Notch 3 intracellular domain] [Source:UniProtKB/Swiss-Prot;Acc:Q61982]	G/A	2155	FALSE
	rs49737001	17	32259279	A/C	A	A		A	ENSMUSG00000038146	ENSMUST00000087723	Notch3	NON_SYNONYMOUS_CODING	0.892	benign	1.39	Neurogenic locus notch homolog protein 3 Precursor (Notch 3) [Contains Notch 3 extracellular truncation;Notch 3 intracellular domain] [Source:UniProtKB/Swiss-Prot;Acc:Q61982]	L/R	2148	FALSE
	rs48082695	17	32259291	C/T	C	C		C	ENSMUSG00000038146	ENSMUST00000087723	Notch3	NON_SYNONYMOUS_CODING	0.161	benign	0.131	Neurogenic locus notch homolog protein 3 Precursor (Notch 3) [Contains Notch 3 extracellular truncation;Notch 3 intracellular domain] [Source:UniProtKB/Swiss-Prot;Acc:Q61982]	R/K	2144	FALSE
	rs51863412	17	32259375	G/C	G	G	G	G	ENSMUSG00000038146	ENSMUST00000087723	Notch3	NON_SYNONYMOUS_CODING	0.992	probably damaging	2.025	Neurogenic locus notch homolog protein 3 Precursor (Notch 3) [Contains Notch 3 extracellular truncation;Notch 3 intracellular domain] [Source:UniProtKB/Swiss-Prot;Acc:Q61982]	P/R	2116	FALSE
	rs46645647	17	32259391	G/T	G	G	G	G	ENSMUSG00000038146	ENSMUST00000087723	Notch3	NON_SYNONYMOUS_CODING	0.996	benign	1.429	Neurogenic locus notch homolog protein 3 Precursor (Notch 3) [Contains Notch 3 extracellular truncation;Notch 3 intracellular domain] [Source:UniProtKB/Swiss-Prot;Acc:Q61982]	P/T	2111	FALSE
	Sudbery et al 2009	17	32270375	G/A	G			A	ENSMUST00000087723	ENSMUSG00000038146	Notch3-001	SYNONYMOUS_CODING	0.284			Notch gene homolog 3 (Drosophila) Gene [Source:MGI (curated);Acc:Notch3-001]	P		TRUE
	Sudbery et al 2009	17	32270402	G/A	G			A	ENSMUST00000087723	ENSMUSG00000038146	Notch3-001	SYNONYMOUS_CODING	0.997			Notch gene homolog 3 (Drosophila) Gene [Source:MGI (curated);Acc:Notch3-001]	N		TRUE
	Sudbery et al 2009	17	32278260	G/T	G	T		T	ENSMUST00000087723	ENSMUSG00000038146	Notch3-001	SYNONYMOUS_CODING	0.99			Notch gene homolog 3 (Drosophila) Gene [Source:MGI (curated);Acc:Notch3-001]	R		TRUE
	Sudbery et al 2009	17	32278491	A/C	A	C		C	ENSMUST00000087723	ENSMUSG00000038146	Notch3-001	SYNONYMOUS_CODING	0.266			Notch gene homolog 3 (Drosophila) Gene [Source:MGI (curated);Acc:Notch3-001]	P		TRUE
	Sudbery et al 2009	17	32280513	C/A	C	A		A	ENSMUST00000087723	ENSMUSG00000038146	Notch3-001	NON_SYNONYMOUS_CODING	0.989	possibly damaging	1.933	Notch gene homolog 3 (Drosophila) Gene [Source:MGI (curated);Acc:Notch3-001]	R/L		TRUE
	Sudbery et al 2009	17	32280641	C/G	C	G			ENSMUST00000087723	ENSMUSG00000038146	Notch3-001	SYNONYMOUS_CODING	0.163			Notch gene homolog 3 (Drosophila) Gene [Source:MGI (curated);Acc:Notch3-001]	P		TRUE
	Sudbery et al 2009	17	32284370	C/T	C			T	ENSMUST00000087723	ENSMUSG00000038146	Notch3-001	NON_SYNONYMOUS_CODING	0.997	benign	1.254	Notch gene homolog 3 (Drosophila) Gene [Source:MGI (curated);Acc:Notch3-001]	S/N		TRUE
	Sudbery et al 2009	17	32284820	G/A	G	A		A	ENSMUST00000087723	ENSMUSG00000038146	Notch3-001	SYNONYMOUS_CODING	0.969			Notch gene homolog 3 (Drosophila) Gene [Source:MGI (curated);Acc:Notch3-001]	S		TRUE
	ENSMUSSNP3139078	17	32290588	G/A	G	-			ENSMUSG00000038146	ENSMUST00000087723	0	SPLICE_SITE,INTRONIC	<0.1	0	0	0			TRUE
	ss159818207	17	32290691	G/A	G	A		A	ENSMUSG00000038146	ENSMUST00000087723	0	SPLICE_SITE,INTRONIC	<0.1	0	0	0			TRUE
	Sudbery et al 2009	17	32290717	A/G	A	G		G	ENSMUST00000087723	ENSMUSG00000038146	Notch3-001	SYNONYMOUS_CODING	0.232			Notch gene homolog 3 (Drosophila) Gene [Source:MGI (curated);Acc:Notch3-001]	R		TRUE
	Sudbery et al 2009	17	32290720	G/A	G	A		A	ENSMUST00000087723	ENSMUSG00000038146	Notch3-001	SYNONYMOUS_CODING	0.277			Notch gene homolog 3 (Drosophila) Gene [Source:MGI (curated);Acc:Notch3-001]	C		TRUE
	ss159818214	17	32295657	A/G	A	G		G	ENSMUSG00000038146	ENSMUST00000087723	Notch3	NON_SYNONYMOUS_CODING	0.312	possibly damaging	1.527	Neurogenic locus notch homolog protein 3 Precursor (Notch 3) [Contains Notch 3 extracellular truncation;Notch 3 intracellular domain] [Source:UniProtKB/Swiss-Prot;Acc:Q61982]	V/A	130	TRUE
	Sudbery et al 2009	17	32303690	A/G	A	G		G	ENSMUST00000087723	ENSMUSG00000038146	Notch3-001	SYNONYMOUS_CODING	<0.1			Notch gene homolog 3 (Drosophila) Gene [Source:MGI (curated);Acc:Notch3-001]	L		TRUE
	Sudbery et al 2009	17	32326075	G/C	G				ENSMUST00000087721	ENSMUSG00000037577	MGI1919182	NON_SYNONYMOUS_CODING	0.991	possibly damaging	1.692	abhydrolase domain containing 9 Gene [Source:MGI Symbol;Acc:MGI:1919182]	R/G		TRUE
	rs52469525	17	32338082	G/T	G	G	G	G	ENSMUSG00000024002	ENSMUST00000003726	Brd4	NON_SYNONYMOUS_CODING	0.9	possibly damaging	1.8	Bromodomain-containing protein 4 (Mitotic chromosome-associated protein)(MCAP) [Source:UniProtKB/Swiss-Prot;Acc:Q9ESU6]	P/T	1016	FALSE
	rs52469525	17	32338082	G/T	G	G	G	G	ENSMUSG00000024002	ENSMUST00000119123	Brd4	NON_SYNONYMOUS_CODING	0.9	possibly damaging	1.8	Bromodomain-containing protein 4 (Mitotic chromosome-associated protein)(MCAP) [Source:UniProtKB/Swiss-Prot;Acc:Q9ESU6]	P/T	1015	FALSE
	rs52469525	17	32338082	G/T	G	G	G	G	ENSMUSG00000024002	ENSMUST00000121285	Brd4	NON_SYNONYMOUS_CODING	0.9	possibly damaging	1.8	Bromodomain-containing protein 4 (Mitotic chromosome-associated protein)(MCAP) [Source:UniProtKB/Swiss-Prot;Acc:Q9ESU6]	P/T	1015	FALSE
	rs52467341	17	32338084	G/T	G	G	G	G	ENSMUSG00000024002	ENSMUST00000003726	Brd4	NON_SYNONYMOUS_CODING	0.943	probably damaging	2.025	Bromodomain-containing protein 4 (Mitotic chromosome-associated protein)(MCAP) [Source:UniProtKB/Swiss-Prot;Acc:Q9ESU6]	P/H	1015	FALSE
	rs52467341	17	32338084	G/T	G	G	G	G	ENSMUSG00000024002	ENSMUST00000119123	Brd4	NON_SYNONYMOUS_CODING	0.943	probably damaging	2.025	Bromodomain-containing protein 4 (Mitotic chromosome-associated protein)(MCAP) [Source:UniProtKB/Swiss-Prot;Acc:Q9ESU6]	P/H	1014	FALSE
	rs52467341	17	32338084	G/T	G	G	G	G	ENSMUSG00000024002	ENSMUST00000121285	Brd4	NON_SYNONYMOUS_CODING	0.943	probably damaging	2.025	Bromodomain-containing protein 4 (Mitotic chromosome-associated protein)(MCAP) [Source:UniProtKB/Swiss-Prot;Acc:Q9ESU6]	P/H	1014	FALSE
	rs13474656	17	32448023	A/G	A	A	A	A	ENSMUSG00000024045	ENSMUST00000002699	Akap8	NON_SYNONYMOUS_CODING	1	possibly damaging	1.773	A-kinase anchor protein 8 (A-kinase anchor protein 95 kDa)(AKAP 95) [Source:UniProtKB/Swiss-Prot;Acc:Q9DBR0]	S/P	390	FALSE
	rs51877234	17	32459619	T/C	T	T	T	T	ENSMUSG00000024045	ENSMUST00000002699		REGULATORY_REGION	<0.1						FALSE
	rs46983451	17	32482262	C/T	C	C	C	C	ENSMUSG00000002625	ENSMUST00000050214		SPLICE_SITE,INTRONIC	0.934						FALSE
	ss159818319	17	32504862	T/C	T	C		C	ENSMUSG00000024050	ENSMUST00000114463	Wiz	NON_SYNONYMOUS_CODING	<0.1	benign	1.317	Protein Wiz (Widely-interspaced zinc finger-containing protein) [Source:UniProtKB/Swiss-Prot;Acc:O88286]	R/G	109	TRUE
	ss159818319	17	32504862	T/C	T	C		C	ENSMUSG00000024050	ENSMUST00000064694	Wiz	NON_SYNONYMOUS_CODING	<0.1	benign	0.148	Protein Wiz (Widely-interspaced zinc finger-containing protein) [Source:UniProtKB/Swiss-Prot;Acc:O88286]	R/G	140	TRUE
	ss159818319	17	32504862	T/C	T	C		C	ENSMUSG00000024050	ENSMUST00000087703	Wiz	NON_SYNONYMOUS_CODING	<0.1	benign	0.148	Protein Wiz (Widely-interspaced zinc finger-containing protein) [Source:UniProtKB/Swiss-Prot;Acc:O88286]	R/G	140	TRUE
	ss159818319	17	32504862	T/C	T	C		C	ENSMUSG00000024050	ENSMUST00000003725	Wiz	NON_SYNONYMOUS_CODING	<0.1	benign	0.137	Protein Wiz (Widely-interspaced zinc finger-containing protein) [Source:UniProtKB/Swiss-Prot;Acc:O88286]	R/G	746	TRUE
	rs46345709	17	32504906	T/C	T	T	T	T	ENSMUSG00000024050	ENSMUST00000003725	Wiz	NON_SYNONYMOUS_CODING	0.53	possibly damaging	1.942	Protein Wiz (Widely-interspaced zinc finger-containing protein) [Source:UniProtKB/Swiss-Prot;Acc:O88286]	E/G	731	FALSE
	rs46345709	17	32504906	T/C	T	T	T	T	ENSMUSG00000024050	ENSMUST00000114463	Wiz	NON_SYNONYMOUS_CODING	0.53	possibly damaging	1.942	Protein Wiz (Widely-interspaced zinc finger-containing protein) [Source:UniProtKB/Swiss-Prot;Acc:O88286]	E/G	94	FALSE
	rs46345709	17	32504906	T/C	T	T	T	T	ENSMUSG00000024050	ENSMUST00000064694	Wiz	NON_SYNONYMOUS_CODING	0.53	possibly damaging	1.659	Protein Wiz (Widely-interspaced zinc finger-containing protein) [Source:UniProtKB/Swiss-Prot;Acc:O88286]	E/G	125	FALSE
	rs46345709	17	32504906	T/C	T	T	T	T	ENSMUSG00000024050	ENSMUST00000087703	Wiz	NON_SYNONYMOUS_CODING	0.53	possibly damaging	1.659	Protein Wiz (Widely-interspaced zinc finger-containing protein) [Source:UniProtKB/Swiss-Prot;Acc:O88286]	E/G	125	FALSE
	rs48168671	17	32618051	A/G	A	A	A	A	ENSMUSG00000061126	ENSMUST00000003413	Cyp4f39	NON_SYNONYMOUS_CODING	0.937	benign	0.184	cytochrome P450, family 2, subfamily E, polypeptide 2 homolog [Source:RefSeq peptide;Acc:NP_796281]	S/G	134	FALSE
	rs50058804	17	32758628	A/C	A	A	A	A	ENSMUSG00000062464	ENSMUST00000077639		SPLICE_SITE,INTRONIC	<0.1						FALSE
	rs46644995	17	32758689	T/C	T	T	C	T	ENSMUSG00000062464	ENSMUST00000077639	677156-201	NON_SYNONYMOUS_CODING	<0.1	benign	0.13	predicted gene, 677156 [Source:RefSeq peptide;Acc:NP_001093657]	L/S	17	FALSE
	rs49056051	17	32758809	G/A	G	G	G	G	ENSMUSG00000062464	ENSMUST00000077639	677156-201	NON_SYNONYMOUS_CODING	<0.1	benign	0.614	predicted gene, 677156 [Source:RefSeq peptide;Acc:NP_001093657]	R/K	57	FALSE
	ss159818349	17	32832347	C/T	C	T		T	ENSMUSG00000073424	ENSMUST00000008801	0	SPLICE_SITE,INTRONIC	<0.1	0	0	0			TRUE
	rs46959864	17	32834851	C/G	C	C	C	C	ENSMUSG00000073424	ENSMUST00000008801	Cyp4f15	NON_SYNONYMOUS_CODING	0.153	benign	0.549	cytochrome P450, family 4, subfamily f, polypeptide 15 [Source:RefSeq peptide;Acc:NP_598888]	H/D	266	FALSE
	rs48641381	17	32836882	G/C	G	G	G	G	ENSMUSG00000073424	ENSMUST00000008801	Cyp4f15	NON_SYNONYMOUS_CODING	0.753	benign	0.476	cytochrome P450, family 4, subfamily f, polypeptide 15 [Source:RefSeq peptide;Acc:NP_598888]	D/H	314	FALSE
	rs47504797	17	32837181	G/C	G	G	G	G	ENSMUSG00000073424	ENSMUST00000008801	Cyp4f15	NON_SYNONYMOUS_CODING	0.851	probably damaging	4.087	cytochrome P450, family 4, subfamily f, polypeptide 15 [Source:RefSeq peptide;Acc:NP_598888]	W/C	344	FALSE
	rs49104457	17	32934551	C/T	C	C	C	C	ENSMUSG00000055202	ENSMUST00000080905	Zfp811	NON_SYNONYMOUS_CODING	<0.1	benign	0.443	zinc finger protein 811 [Source:RefSeq peptide;Acc:NP_899000]	A/T	486	FALSE
	ss159818661	17	33020754	G/A	G	A		A	ENSMUSG00000057254	ENSMUST00000077984	BC066107	NON_SYNONYMOUS_CODING	<0.1	benign	0.26	zinc finger protein 870 [Source:RefSeq peptide;Acc:NP_997128]	T/M	182	TRUE
	Sudbery et al 2009	17	33020867	C/T	C	T		T	ENSMUST00000077984	ENSMUSG00000057254		SYNONYMOUS_CODING	<0.1				E		TRUE
	Sudbery et al 2009	17	33020868	T/C	T	C		C	ENSMUST00000077984	ENSMUSG00000057254		NON_SYNONYMOUS_CODING	<0.1	benign	0.532		E/G		TRUE
	rs48146641	17	33020868	T/C	T	T	T	T	ENSMUSG00000057254	ENSMUST00000077984	BC066107	NON_SYNONYMOUS_CODING	<0.1	benign	0.532	zinc finger protein 870 [Source:RefSeq peptide;Acc:NP_997128]	E/G	144	FALSE
	ss159818775	17	33062264	C/T	C	T		T	ENSMUSG00000024055	ENSMUST00000075253	0	SPLICE_SITE,INTRONIC	0.232	0	0	0			TRUE
	ss159818806	17	33066954	C/T	C	T		T	ENSMUSG00000024055	ENSMUST00000075253	0	NON_SYNONYMOUS_CODING	0.655	0	0	0	R/H	254	TRUE
	ss159818965	17	33202379	T/G	T	G		G	ENSMUSG00000023350	ENSMUST00000024121	4921501E09Rik	NON_SYNONYMOUS_CODING	0.432	probably damaging	2.289	PHD finger protein 8 [Source:RefSeq peptide;Acc:NP_001009544]	D/A	798	TRUE
	ss159818968	17	33202742	T/C	T	C		C	ENSMUSG00000023350	ENSMUST00000024121	4921501E09Rik	NON_SYNONYMOUS_CODING	0.72	possibly damaging	1.734	PHD finger protein 8 [Source:RefSeq peptide;Acc:NP_001009544]	E/G	677	TRUE
	Sudbery et al 2009	17	33202890	C/T	C	T		T	ENSMUST00000024121	ENSMUSG00000023350	NP_001009544	NON_SYNONYMOUS_CODING	<0.1	benign	1.155	PHD finger protein 8 [Source:RefSeq peptide;Acc:NP_001009544]	E/K		TRUE
	Sudbery et al 2009	17	33203042	T/C	T	C			ENSMUST00000024121	ENSMUSG00000023350	NP_001009544	NON_SYNONYMOUS_CODING	0.624	benign	1.095	PHD finger protein 8 [Source:RefSeq peptide;Acc:NP_001009544]	N/S		TRUE
	Sudbery et al 2009	17	33203529	T/C	T			C	ENSMUST00000024121	ENSMUSG00000023350	NP_001009544	NON_SYNONYMOUS_CODING	0.873	benign	1.429	PHD finger protein 8 [Source:RefSeq peptide;Acc:NP_001009544]	N/D		TRUE
	Sudbery et al 2009	17	33203971	A/G	A	G		G	ENSMUST00000024121	ENSMUSG00000023350	NP_001009544	SYNONYMOUS_CODING	0.994			PHD finger protein 8 [Source:RefSeq peptide;Acc:NP_001009544]	Y		TRUE
	Sudbery et al 2009	17	33203974	G/A	G	A		A	ENSMUST00000024121	ENSMUSG00000023350	NP_001009544	SYNONYMOUS_CODING	0.992			PHD finger protein 8 [Source:RefSeq peptide;Acc:NP_001009544]	F		TRUE
	rs48600833	17	33237600	A/G	A	-	A		ENSMUSG00000067424	ENSMUST00000087650	Zfp563	NON_SYNONYMOUS_CODING,SPLICE_SITE	<0.1	possibly damaging	1.605	zinc finger protein 563 [Source:RefSeq peptide;Acc:NP_001020121]	M/V	1	FALSE
	Sudbery et al 2009	17	33237600	A/G	A	G		G	ENSMUST00000087650	ENSMUSG00000067424	MGI2677168	NON_SYNONYMOUS_CODING	<0.1			zinc finger protein 563 Gene [Source:MGI Symbol;Acc:MGI:2677168]	M/V		TRUE
	Sudbery et al 2009	17	33239208	C/T	C	T			ENSMUST00000087650	ENSMUSG00000067424	MGI2677168	SYNONYMOUS_CODING	0.997			zinc finger protein 563 Gene [Source:MGI Symbol;Acc:MGI:2677168]	N		TRUE
Tir1	rs52183235	17	33273289	T/G	T	T	T	T	ENSMUSG00000048602	ENSMUST00000053896	Morc2b	NON_SYNONYMOUS_CODING	0.891	possibly damaging	1.927	MORC family CW-type zinc finger protein 2B (TCE6) [Source:UniProtKB/Swiss-Prot;Acc:Q8C5W4]	K/T	818	FALSE
Tir1	Sudbery et al 2009	17	33273721	A/G	A			G	ENSMUST00000053896	ENSMUSG00000048602	MGI3045293	NON_SYNONYMOUS_CODING	<0.1	benign	1.305	microrchidia 2B Gene [Source:MGI Symbol;Acc:MGI:3045293]	L/P		TRUE
Tir1	rs33493422	17	33273721	A/G	A	G			ENSMUSG00000048602	ENSMUST00000053896	Morc2b	NON_SYNONYMOUS_CODING	<0.1	benign	1.305	MORC family CW-type zinc finger protein 2B (TCE6) [Source:UniProtKB/Swiss-Prot;Acc:Q8C5W4]	L/P	674	TRUE
Tir1	rs33493422	17	33273721	A/G	A	G			ENSMUSG00000048602	ENSMUST00000087649	Morc2b	NON_SYNONYMOUS_CODING	<0.1	benign	1.305	MORC family CW-type zinc finger protein 2B (TCE6) [Source:UniProtKB/Swiss-Prot;Acc:Q8C5W4]	L/P	674	TRUE
Tir1	ss159819044	17	33274181	T/C	T	C	C	C	ENSMUSG00000048602	ENSMUST00000053896	Morc2b	NON_SYNONYMOUS_CODING	<0.1	benign	0	MORC family CW-type zinc finger protein 2B (TCE6) [Source:UniProtKB/Swiss-Prot;Acc:Q8C5W4]	I/V	521	TRUE
Tir1	ss159819044	17	33274181	T/C	T	C	C	C	ENSMUSG00000048602	ENSMUST00000087649	Morc2b	NON_SYNONYMOUS_CODING	<0.1	benign	0	MORC family CW-type zinc finger protein 2B (TCE6) [Source:UniProtKB/Swiss-Prot;Acc:Q8C5W4]	I/V	521	TRUE
Tir1	ss159819044	17	33274181		T	C	C	C	ENSMUSG00000048602		Morc2b		<0.1			MORC family CW-type zinc finger protein 2B (TCE6) [Source:UniProtKB/Swiss-Prot;Acc:Q8C5W4]			TRUE
Tir1	ss159825975	17	33275262		A		G	G	ENSMUSG00000048602		Morc2b		0.452			MORC family CW-type zinc finger protein 2B (TCE6) [Source:UniProtKB/Swiss-Prot;Acc:Q8C5W4]			TRUE
Tir1	Sudbery et al 2009	17	33275262	A/G	A	G			ENSMUST00000053896	ENSMUSG00000048602	MGI3045293	SYNONYMOUS_CODING	0.452			microrchidia 2B Gene [Source:MGI Symbol;Acc:MGI:3045293]	D		TRUE
Tir1	ss159825982	17	33283941	A/G	A		G	G	ENSMUSG00000061532	ENSMUST00000039217	EG383232	NON_SYNONYMOUS_CODING	<0.1	possibly damaging	1.943	ZFP421 [Source:UniProtKB/TrEMBL;Acc:Q8CG23]	Y/C	155	TRUE
Tir1	Sudbery et al 2009	17	33283941	A/G	A	G			ENSMUST00000039217	ENSMUSG00000061532	MGI3643505	NON_SYNONYMOUS_CODING	<0.1			predicted gene, EG383232 Gene [Source:MGI Symbol;Acc:MGI:3643505]	Y/C		TRUE
Tir1	ENSMUSSNP3469236	17	33313652	G/T	G				ENSMUSG00000079309	ENSMUST00000112168	Olfr239	NON_SYNONYMOUS_CODING	0.984	benign	0.987	olfactory receptor 55 [Source:RefSeq peptide;Acc:NP_035128]	A/S	101	TRUE
Tir1	ENSMUSSNP7093716	17	33313676	A/T	A				ENSMUSG00000079309	ENSMUST00000112168	Olfr239	NON_SYNONYMOUS_CODING	0.986	benign	0.039	olfactory receptor 55 [Source:RefSeq peptide;Acc:NP_035128]	T/S	109	TRUE
Tir1	rs46324535	17	33379368	G/A		G	C	G	ENSMUSG00000008686	ENSMUST00000008830	Zfp422-rs1	NON_SYNONYMOUS_CODING	0.758	benign	1.061	zinc finger protein 422, related sequence 1 [Source:RefSeq peptide;Acc:NP_084228]	R/Q	245	TRUE
Tir1	ENSMUSSNP5254571	17	33379513	C/T	C		C		ENSMUSG00000008686	ENSMUST00000008830	Zfp422-rs1	NON_SYNONYMOUS_CODING	<0.1	benign	1.237	zinc finger protein 422, related sequence 1 [Source:RefSeq peptide;Acc:NP_084228]	A/T	197	FALSE
Tir1	rs51845696	17	33379513	G/A		A	C	A	ENSMUSG00000008686	ENSMUST00000008830	0	NON_SYNONYMOUS_CODING	<0.1	0	0	0	A/T	197	TRUE
Tir1	rs48052544	17	33379588	A/G		G	A	G	ENSMUSG00000008686	ENSMUST00000008830	Zfp422-rs1	NON_SYNONYMOUS_CODING	<0.1	benign	1.049	zinc finger protein 422, related sequence 1 [Source:RefSeq peptide;Acc:NP_084228]	N/D	172	TRUE
Tir1	ENSMUSSNP6788142	17	33379630	A/G	A				ENSMUSG00000008686	ENSMUST00000008830	Zfp422-rs1	NON_SYNONYMOUS_CODING	<0.1	benign	0.688	zinc finger protein 422, related sequence 1 [Source:RefSeq peptide;Acc:NP_084228]	S/P	158	TRUE
Tir1	ENSMUSSNP3495720	17	33379638	A/G	A				ENSMUSG00000008686	ENSMUST00000008830	Zfp422-rs1	NON_SYNONYMOUS_CODING	<0.1	benign	1.056	zinc finger protein 422, related sequence 1 [Source:RefSeq peptide;Acc:NP_084228]	V/A	155	TRUE
Tir1	rs48958389	17	33379664	C/G		G	C	G	ENSMUSG00000008686	ENSMUST00000008830	Zfp422-rs1	NON_SYNONYMOUS_CODING	<0.1	benign	0.187	zinc finger protein 422, related sequence 1 [Source:RefSeq peptide;Acc:NP_084228]	I/M	146	TRUE
Tir1	ENSMUSSNP764983	17	33379785	T/G	T	G			ENSMUSG00000008686	ENSMUST00000008830	Zfp422-rs1	NON_SYNONYMOUS_CODING	<0.1	benign	1.314	zinc finger protein 422, related sequence 1 [Source:RefSeq peptide;Acc:NP_084228]	K/T	106	TRUE
Tir1	ENSMUSSNP440556	17	33380650	A/C	A	C			ENSMUSG00000008686	ENSMUST00000008830		SPLICE_SITE,INTRONIC	<0.1						TRUE
Tir1	ENSMUSSNP6564304	17	33380661	G/A	G				ENSMUSG00000008686	ENSMUST00000008830	Zfp422-rs1	NON_SYNONYMOUS_CODING	<0.1	benign	0.387	zinc finger protein 422, related sequence 1 [Source:RefSeq peptide;Acc:NP_084228]	S/L	68	TRUE
Tir1	Sudbery et al 2009	17	33471320	G/A	G	A		A	ENSMUST00000054072	ENSMUSG00000003929	MGI1890752	SYNONYMOUS_CODING	0.956			zinc finger protein 81 Gene [Source:MGI Symbol;Acc:MGI:1890752]	S		TRUE
Tir1	Sudbery et al 2009	17	33471662	A/G	A	G	G		ENSMUST00000054072	ENSMUSG00000003929	MGI1890752	SYNONYMOUS_CODING	0.813			zinc finger protein 81 Gene [Source:MGI Symbol;Acc:MGI:1890752]	S		TRUE
Tir1	ss159826028	17	33472308	T/C	T		C	C	ENSMUSG00000003929	ENSMUST00000054072	Zfp81	NON_SYNONYMOUS_CODING	<0.1	benign	0.377	zinc finger protein 81 [Source:RefSeq peptide;Acc:NP_997424]	N/S	159	TRUE
Tir1	ss159826029	17	33472495	C/T	C		T	T	ENSMUSG00000003929	ENSMUST00000054072	Zfp81	NON_SYNONYMOUS_CODING	<0.1	benign	0.906	zinc finger protein 81 [Source:RefSeq peptide;Acc:NP_997424]	G/R	97	TRUE
Tir1	Sudbery et al 2009	17	33519363	C/T	C	T			ENSMUST00000038834	ENSMUSG00000055240	MGI107547	SYNONYMOUS_CODING	<0.1			zinc finger protein 101 Gene [Source:MGI Symbol;Acc:MGI:107547]	V		TRUE
Tir1	Sudbery et al 2009	17	33523403	C/T	C	T			ENSMUST00000038834	ENSMUSG00000055240	MGI107547	NON_SYNONYMOUS_CODING	<0.1	benign	0.351	zinc finger protein 101 Gene [Source:MGI Symbol;Acc:MGI:107547]	R/Q		TRUE
Tir1	Sudbery et al 2009	17	33686021	A/G	A			G	ENSMUST00000087623	ENSMUSG00000024299	MGI2449112	SYNONYMOUS_CODING	0.999			a disintegrin-like and metallopeptidase (reprolysin type) with thrombospondin type 1 motif, 10 Gene [Source:MGI Symbol;Acc:MGI:2449112]	G		TRUE
Tir1	ss159819307	17	33712873	T/C	T	C	C		ENSMUSG00000024300	ENSMUST00000087605		SPLICE_SITE,SYNONYMOUS_CODING	0.495				F	47	TRUE
Tir1	ss159819307	17	33712873	T/C	T	C	C		ENSMUSG00000024300	ENSMUST00000114400		SPLICE_SITE,SYNONYMOUS_CODING	0.495				F	46	TRUE
Tir1	ss159819324	17	33720624	C/T	G	T			ENSMUSG00000024300	ENSMUST00000087605	0	SPLICE_SITE,INTRONIC	<0.1	0	0	0			TRUE
Tir1	Sudbery et al 2009	17	33729949	T/C	T	C	C		ENSMUST00000087605	ENSMUSG00000024300	MGI107711	SYNONYMOUS_CODING	0.995			myosin IF Gene [Source:MGI Symbol;Acc:MGI:107711]	R		TRUE
Tir1	rs13469537	17	33768355	C/A	C	C	C	C	ENSMUSG00000073423	ENSMUST00000073570	Zfp414	NON_SYNONYMOUS_CODING	0.935	possibly damaging	1.677	Zinc finger protein 414 [Source:UniProtKB/Swiss-Prot;Acc:Q9DCK4]	A/D	261	FALSE
Tir1	ss159819414	17	33777716	G/A	G	A	A	A	ENSMUSG00000032739	ENSMUST00000052079	Pram1	NON_SYNONYMOUS_CODING	<0.1	benign	0.141	PML-RARA-regulated adapter molecule 1 (PRAM-1) [Source:UniProtKB/Swiss-Prot;Acc:Q6BCL1]	R/K	104	TRUE
Tir1	ss159819414	17	33777716	G/A	G	A	A	A	ENSMUSG00000032739	ENSMUST00000116619	Pram1	NON_SYNONYMOUS_CODING	<0.1	benign	0.141	PML-RARA-regulated adapter molecule 1 (PRAM-1) [Source:UniProtKB/Swiss-Prot;Acc:Q6BCL1]	R/K	103	TRUE
Tir1	ss159819417	17	33781645	T/C	T	C	C	C	ENSMUSG00000032739	ENSMUST00000052079	Pram1	NON_SYNONYMOUS_CODING	<0.1	probably damaging	2.299	PML-RARA-regulated adapter molecule 1 (PRAM-1) [Source:UniProtKB/Swiss-Prot;Acc:Q6BCL1]	L/P	537	TRUE
Tir1	ss159819417	17	33781645	T/C	T	C	C	C	ENSMUSG00000032739	ENSMUST00000116619	Pram1	NON_SYNONYMOUS_CODING	<0.1	probably damaging	2.299	PML-RARA-regulated adapter molecule 1 (PRAM-1) [Source:UniProtKB/Swiss-Prot;Acc:Q6BCL1]	L/P	536	TRUE
Tir1	ss159819439	17	33846923	C/T	C	T		T	ENSMUSG00000079557	ENSMUST00000066121		SPLICE_SITE,INTRONIC	<0.1						TRUE
Tir1	rs13469523	17	33955251	G/A	G	G	G	G	ENSMUSG00000042099	ENSMUST00000048560	Kank3	NON_SYNONYMOUS_CODING	0.983	benign	1.336	KN motif and ankyrin repeat domain-containing protein 3 (Ankyrin repeat domain-containing protein 47) [Source:UniProtKB/Swiss-Prot;Acc:Q9Z1P7]	E/K	383	FALSE
Tir1	ss159826476	17	33956791	T/C	T		C		ENSMUSG00000042099	ENSMUST00000048560	Kank3	NON_SYNONYMOUS_CODING	<0.1	possibly damaging	1.534	KN motif and ankyrin repeat domain-containing protein 3 (Ankyrin repeat domain-containing protein 47) [Source:UniProtKB/Swiss-Prot;Acc:Q9Z1P7]	S/P	580	TRUE
Tir1	ENSMUSSNP3734896	17	34020615	T/G	T				ENSMUSG00000079553	ENSMUST00000114361	CT030732.13	NON_SYNONYMOUS_CODING	<0.1	benign	0.852	Kinesin-like protein KIFC1 [Source:UniProtKB/Swiss-Prot;Acc:Q9QWT9]	E/A	258	TRUE
Tir1	ENSMUSSNP3734896	17	34020615	T/G	T				ENSMUSG00000079553	ENSMUST00000114364	CT030732.13	NON_SYNONYMOUS_CODING	<0.1	benign	0.425	Kinesin-like protein KIFC1 [Source:UniProtKB/Swiss-Prot;Acc:Q9QWT9]	E/A	324	TRUE
Tir1	rs13459236	17	34021818	C/G		C	G	G	ENSMUSG00000079553	ENSMUST00000114361	CT030732.13	NON_SYNONYMOUS_CODING	0.134	benign	0.315	Kinesin-like protein KIFC1 [Source:UniProtKB/Swiss-Prot;Acc:Q9QWT9]	Q/E	116	TRUE
Tir1	rs13459236	17	34021818	C/G		C	G	G	ENSMUSG00000079553	ENSMUST00000114364	CT030732.13	NON_SYNONYMOUS_CODING	0.134	benign	0.31	Kinesin-like protein KIFC1 [Source:UniProtKB/Swiss-Prot;Acc:Q9QWT9]	Q/E	160	TRUE
Tir1	rs51420425	17	34022109	G/C		C	C	C	ENSMUSG00000079553	ENSMUST00000114364	0	SPLICE_SITE,INTRONIC	0.271	0	0	0			TRUE
Tir1	ENSMUSSNP4614003	17	34022109	C/G	C				ENSMUSG00000079553	ENSMUST00000114364		SPLICE_SITE,INTRONIC	0.271						TRUE
Tir1	Sudbery et al 2009	17	34022803	T/C	T			C	ENSMUST00000114361	ENSMUSG00000079553	MGI109596	NON_SYNONYMOUS_CODING	<0.1	benign	0.117	kinesin family member C1 Gene [Source:MGI Symbol;Acc:MGI:109596]	I/V		TRUE
Tir1	ENSMUSSNP671840	17	34022803	T/C	T	C			ENSMUSG00000079553	ENSMUST00000114361	CT030732.13	NON_SYNONYMOUS_CODING	<0.1	benign	0.117	Kinesin-like protein KIFC1 [Source:UniProtKB/Swiss-Prot;Acc:Q9QWT9]	I/V	58	TRUE
Tir1	ENSMUSSNP671840	17	34022803	T/C	T	C			ENSMUSG00000079553	ENSMUST00000114364	CT030732.13	NON_SYNONYMOUS_CODING	<0.1	benign	0.117	Kinesin-like protein KIFC1 [Source:UniProtKB/Swiss-Prot;Acc:Q9QWT9]	I/V	102	TRUE
Tir1	Sudbery et al 2009	17	34023793	C/G	C		G		ENSMUST00000114364	ENSMUSG00000079553	MGI109596	5PRIME_UTR	0.459			kinesin family member C1 Gene [Source:MGI Symbol;Acc:MGI:109596]	0		TRUE
Tir1	ss159829255	17	34045316	A/T	A			T	ENSMUSG00000002307	ENSMUST00000079421	Daxx	REGULATORY_REGION	<0.1						TRUE
Tir1	ss159819549	17	34048493	A/G	A	G		G	ENSMUSG00000002307	ENSMUST00000079421	Daxx	NON_SYNONYMOUS_CODING	<0.1	benign	1.37	Death domain-associated protein 6 (Daxx) [Source:UniProtKB/Swiss-Prot;Acc:O35613]	N/S	179	TRUE
Tir1	rs13463207	17	34055380	A/G	A		A		ENSMUSG00000051390	ENSMUST00000053429	Zbtb22	NON_SYNONYMOUS_CODING	1	benign	1.047	Zinc finger and BTB domain-containing protein 22 (Zinc finger protein 297)(Protein BING1) [Source:UniProtKB/Swiss-Prot;Acc:Q9Z0G7]	K/R	518	FALSE
Tir1	Sudbery et al 2009	17	34057285	T/C	T	C		C	ENSMUST00000114350	ENSMUSG00000024308	MGI1201689	SYNONYMOUS_CODING	<0.1			TAP binding protein Gene [Source:MGI Symbol;Acc:MGI:1201689]	0		TRUE
Tir1	rs13464888	17	34062475	C/T	C	C	C	C	ENSMUSG00000024308	ENSMUST00000025161	Tapbp	NON_SYNONYMOUS_CODING	<0.1	benign	-0.51	Tapasin Precursor (TPSN)(TPN)(TAP-binding protein)(TAP-associated protein) [Source:UniProtKB/Swiss-Prot;Acc:Q9R233]	A/V	200	FALSE
Tir1	Sudbery et al 2009	17	34069284	T/C	T	C	C	C	ENSMUST00000047503	ENSMUSG00000041354	MGI107483	SYNONYMOUS_CODING	0.925			ral guanine nucleotide dissociation stimulator-like 2 Gene [Source:MGI Symbol;Acc:MGI:107483]	0		TRUE
Tir1	rs50014799	17	34069285	C/T	C	T	T	T	ENSMUSG00000041354	ENSMUST00000047503	Rgl2	NON_SYNONYMOUS_CODING	0.928	probably damaging	2.108	Ral guanine nucleotide dissociation stimulator-like 2 (RalGDS-like factor)(Ras-associated protein RAB2L) [Source:UniProtKB/Swiss-Prot;Acc:Q61193]	H/Y	147	TRUE
Tir1	rs45777152	17	34069450	T/G	T	T	T	T	ENSMUSG00000041354	ENSMUST00000047503	Rgl2	NON_SYNONYMOUS_CODING	1	probably damaging	-0.132	Ral guanine nucleotide dissociation stimulator-like 2 (RalGDS-like factor)(Ras-associated protein RAB2L) [Source:UniProtKB/Swiss-Prot;Acc:Q61193]	F/L	174	FALSE
Tir1	rs33482449	17	34077878	A/G	A	G	G	G	ENSMUSG00000024312	ENSMUST00000025170	Wdr46	NON_SYNONYMOUS_CODING	0.205	benign	1.223	WD repeat-containing protein 46 (WD repeat-containing protein BING4) [Source:UniProtKB/Swiss-Prot;Acc:Q9Z0H1]	T/A	40	TRUE
Tir1	Sudbery et al 2009	17	34077878	A/G	A	G	G		ENSMUST00000025170	ENSMUSG00000024312	MGI1931871	NON_SYNONYMOUS_CODING	0.205			WD repeat domain 46 Gene [Source:MGI Symbol;Acc:MGI:1931871]	0		TRUE
Tir1	ss159819623	17	34078570	C/T	C	T	T	T	ENSMUSG00000024312	ENSMUST00000025170		SPLICE_SITE,INTRONIC	<0.1						TRUE
Tir1	ss159819632	17	34080331	C/T	C	T	T		ENSMUSG00000024312	ENSMUST00000025170	Wdr46	NON_SYNONYMOUS_CODING	0.984	benign	0.622	WD repeat-containing protein 46 (WD repeat-containing protein BING4) [Source:UniProtKB/Swiss-Prot;Acc:Q9Z0H1]	L/F	221	TRUE
Tir1	Sudbery et al 2009	17	34080384	A/G	A			G	ENSMUST00000025170	ENSMUSG00000024312	MGI1931871	SYNONYMOUS_CODING	0.998			WD repeat domain 46 Gene [Source:MGI Symbol;Acc:MGI:1931871]	0		TRUE
Tir1	ss159819661	17	34085850	C/A	C	A	A	A	ENSMUSG00000024312	ENSMUST00000025170	Wdr46	NON_SYNONYMOUS_CODING	<0.1	benign	0.195	WD repeat-containing protein 46 (WD repeat-containing protein BING4) [Source:UniProtKB/Swiss-Prot;Acc:Q9Z0H1]	Q/K	531	TRUE
Tir1	rs50144601	17	34086082	C/A	C	C	C	C	ENSMUSG00000024312	ENSMUST00000025170	Wdr46	NON_SYNONYMOUS_CODING	<0.1	benign	0.762	WD repeat-containing protein 46 (WD repeat-containing protein BING4) [Source:UniProtKB/Swiss-Prot;Acc:Q9Z0H1]	T/K	561	FALSE
Tir1	rs46297313	17	34086281	T/A	T	A			ENSMUSG00000024312	ENSMUST00000025170	Wdr46	NON_SYNONYMOUS_CODING	<0.1	benign	1.219	WD repeat-containing protein 46 (WD repeat-containing protein BING4) [Source:UniProtKB/Swiss-Prot;Acc:Q9Z0H1]	M/K	597	TRUE
Tir1	Sudbery et al 2009	17	34086281	T/A	T	A	A	A	ENSMUST00000025170	ENSMUSG00000024312	MGI1931871	NON_SYNONYMOUS_CODING	<0.1			WD repeat domain 46 Gene [Source:MGI Symbol;Acc:MGI:1931871]	M/K		TRUE
Tir1	rs49040959	17	34086283	C/A	C	C	C		ENSMUSG00000024312	ENSMUST00000025170	Wdr46	NON_SYNONYMOUS_CODING	<0.1	benign	-0.427	WD repeat-containing protein 46 (WD repeat-containing protein BING4) [Source:UniProtKB/Swiss-Prot;Acc:Q9Z0H1]	P/T	598	FALSE
Tir1	Sudbery et al 2009	17	34086283	C/A	C	A	A	A	ENSMUST00000025170	ENSMUSG00000024312	MGI1931871	NON_SYNONYMOUS_CODING	<0.1			WD repeat domain 46 Gene [Source:MGI Symbol;Acc:MGI:1931871]	P/T		TRUE
Tir1	Sudbery et al 2009	17	34087287	A/G	A	G			ENSMUST00000087543	ENSMUSG00000067370	MGI Symbol;Acc	SYNONYMOUS_CODING	0.995			UDP-Gal:betaGlcNAc beta 1,3-galactosyltransferase, polypeptide 4 Gene [Source:MGI Symbol;Acc:MGI:1859517]	0		TRUE
Tir1	rs30044529	17	34089402	C/T		G	C	C	ENSMUSG00000067370	ENSMUST00000087543	B3galt4	REGULATORY_REGION	1	0	0	UDP-Gal:betaGlcNAc beta 1,3-galactosyltransferase, polypeptide 4 Gene			TRUE
Tir1	rs51331834	17	34089438	C/T	G	C	C	C	ENSMUSG00000067370	ENSMUST00000087543	B3galt4	REGULATORY_REGION	1			UDP-Gal:betaGlcNAc beta 1,3-galactosyltransferase, polypeptide 4 Gene			TRUE
Tir1	Sudbery et al 2009	17	34093106	A/G	A			G	ENSMUST00000114330	ENSMUSG00000024319	MGI1330304	SYNONYMOUS_CODING	0.996			vacuolar protein sorting 52 (yeast) Gene [Source:MGI Symbol;Acc:MGI:1330304]	0		TRUE
Tir1	ss159819700	17	34094852	G/A	G	A	A	A	ENSMUSG00000024319	ENSMUST00000025178	0	SPLICE_SITE,INTRONIC	0.896	0	0	0			TRUE
Tir1	ss159819701	17	34094958	C/T	C	T		T	ENSMUSG00000024319	ENSMUST00000025178	0	SPLICE_SITE,INTRONIC	0.641	0	0	0			TRUE
Tir1	Sudbery et al 2009	17	34098105	T/G	T			G	ENSMUST00000114330	ENSMUSG00000024319	MGI1330304	SYNONYMOUS_CODING	0.998			vacuolar protein sorting 52 (yeast) Gene [Source:MGI Symbol;Acc:MGI:1330304]	L		TRUE
Tir1	Sudbery et al 2009	17	34098111	T/C	T			C	ENSMUST00000114330	ENSMUSG00000024319	MGI1330304	SYNONYMOUS_CODING	0.996			vacuolar protein sorting 52 (yeast) Gene [Source:MGI Symbol;Acc:MGI:1330304]	T		TRUE
Tir1	rs49418939	17	34099103	C/G	C	C		C	ENSMUSG00000024319	ENSMUST00000114330	Vps52	NON_SYNONYMOUS_CODING	0.935	benign	-0.65	Vacuolar protein sorting-associated protein 52 homolog [Source:UniProtKB/Swiss-Prot;Acc:Q8C754]	A/G	390	FALSE
Tir1	rs49418939	17	34099103	C/G	C	C		C	ENSMUSG00000024319	ENSMUST00000025178	Vps52	NON_SYNONYMOUS_CODING	0.935	benign	0.283	Vacuolar protein sorting-associated protein 52 homolog [Source:UniProtKB/Swiss-Prot;Acc:Q8C754]	A/G	458	FALSE
Tir1	Sudbery et al 2009	17	34112408	A/G	A		G		ENSMUST00000087244	ENSMUSG00000067203		NON_SYNONYMOUS_CODING	<0.1	benign	0.065		V/A		TRUE
Tir1	Sudbery et al 2009	17	34112420	T/C	T	C	C	C	ENSMUST00000087244	ENSMUSG00000067203	CR974462.2	NON_SYNONYMOUS_CODING	<0.1	probably damaging	2.061		H/R		TRUE
Tir1	rs16787210	17	34112420	T/C	T	C	C	C	ENSMUSG00000067203	ENSMUST00000087244	CR974462.5-1	NON_SYNONYMOUS_CODING	<0.1	probably damaging	2.061	tenascin XB [Source:RefSeq peptide;Acc:NP_112453]	H/R	343	TRUE
Tir1	rs51128061	17	34112723	G/T	G				ENSMUSG00000067203	ENSMUST00000087244	0	NON_SYNONYMOUS_CODING	0.954	0	0	0	H/Q	284	TRUE
Tir1	rs51600946	17	34112725	G/C	G				ENSMUSG00000067203	ENSMUST00000087244	CR974462.5-1	NON_SYNONYMOUS_CODING	0.96	benign	0.092	tenascin XB [Source:RefSeq peptide;Acc:NP_112453]	H/D	284	TRUE
Tir1	rs46902096	17	34112919	T/C	T	C			ENSMUSG00000067203	ENSMUST00000087244	CR974462.5-1	NON_SYNONYMOUS_CODING	0.14	benign	0.313	tenascin XB [Source:RefSeq peptide;Acc:NP_112453]	D/G	219	TRUE
Tir1	Sudbery et al 2009	17	34112954	T/G	T		G		ENSMUST00000087244	ENSMUSG00000067203		SYNONYMOUS_CODING	0.981				P		TRUE
Tir1	rs51103868	17	34114708	C/G	C				ENSMUSG00000067203	ENSMUST00000087244	0	SPLICE_SITE,INTRONIC	0.55	0	0	0			TRUE
Tir1	rs49488597	17	34114733	G/T	G				ENSMUSG00000067203	ENSMUST00000087244	CR974462.5-1	NON_SYNONYMOUS_CODING	0.762	benign	1.134	tenascin XB [Source:RefSeq peptide;Acc:NP_112453]	A/E	198	TRUE
Tir1	rs49259513	17	34114735	G/A/C	G	-			ENSMUSG00000067203	ENSMUST00000087244	CR974462.5-1	NON_SYNONYMOUS_CODING	0.75	benign	0.589	tenascin XB [Source:RefSeq peptide;Acc:NP_112453]	N/K	197	TRUE
Tir1	Sudbery et al 2009	17	34114746	C/G	C		G		ENSMUST00000087244	ENSMUSG00000067203		NON_SYNONYMOUS_CODING	0.864				E/Q		TRUE
Tir1	rs50972829	17	34114814	A/G	A	-			ENSMUSG00000067203	ENSMUST00000087244	CR974462.5-1	NON_SYNONYMOUS_CODING	<0.1	benign	0.644	tenascin XB [Source:RefSeq peptide;Acc:NP_112453]	V/A	171	TRUE
Tir1	rs48267223	17	34114833	C/T	C	-	-		ENSMUSG00000067203	ENSMUST00000087244	CR974462.5-1	NON_SYNONYMOUS_CODING	<0.1	possibly damaging	1.13	tenascin XB [Source:RefSeq peptide;Acc:NP_112453]	G/R	165	TRUE
Tir1	Sudbery et al 2009	17	34114833	C/T	C	T	T	T	ENSMUST00000087244	ENSMUSG00000067203		NON_SYNONYMOUS_CODING	<0.1				G/R		TRUE
Tir1	Sudbery et al 2009	17	34114834	A/G	A	G	G	G	ENSMUST00000087244	ENSMUSG00000067203		SYNONYMOUS_CODING	<0.1				T		TRUE
Tir1	rs50588965	17	34114957	C/A	C	A			ENSMUSG00000067203	ENSMUST00000087244	CR974462.5-1	NON_SYNONYMOUS_CODING	0.878	benign	0.884	tenascin XB [Source:RefSeq peptide;Acc:NP_112453]	E/D	123	TRUE
Tir1	Sudbery et al 2009	17	34114957	C/A	C		A	A	ENSMUST00000087244	ENSMUSG00000067203		NON_SYNONYMOUS_CODING	0.878				E/D		TRUE
Tir1	Sudbery et al 2009	17	34115254	C/A	C		A		ENSMUST00000087244	ENSMUSG00000067203		NON_SYNONYMOUS_CODING	<0.1				Q/H		TRUE
Tir1	Sudbery et al 2009	17	34115332	T/C	T		C		ENSMUST00000087244	ENSMUSG00000067203		SYNONYMOUS_CODING	0.366				E		TRUE
Tir1	ENSMUSSNP2116722	17	34115436	T/C	T	C			ENSMUSG00000067203	ENSMUST00000087244	CR974462.5-1	NON_SYNONYMOUS_CODING	0.803	benign	0.14	tenascin XB [Source:RefSeq peptide;Acc:NP_112453]	M/V	33	TRUE
Tir1	rs8237574	17	34115704	T/G	T	G	G	G	ENSMUSG00000067203	ENSMUST00000087244	CR974462.5-1	NON_SYNONYMOUS_CODING	0.299	benign	1.363	tenascin XB [Source:RefSeq peptide;Acc:NP_112453]	E/A	11	TRUE
Tir1	Sudbery et al 2009	17	34115704	T/G	T			G	ENSMUST00000087244	ENSMUSG00000067203		NON_SYNONYMOUS_CODING	0.299				E/A		TRUE
Tir1	rs47311850	17	34119278	G/A	G	A			ENSMUSG00000054354	ENSMUST00000067372	AA388235	NON_SYNONYMOUS_CODING	<0.1	possibly damaging	1.8	hypothetical protein LOC433100 [Source:RefSeq peptide;Acc:NP_001013815]	R/H	6	TRUE
Tir1	rs48590366	17	34119293	A/G	A				ENSMUSG00000054354	ENSMUST00000067372	AA388235	NON_SYNONYMOUS_CODING	<0.1	benign	0.9	hypothetical protein LOC433100 [Source:RefSeq peptide;Acc:NP_001013815]	Q/R	11	TRUE
Tir1	rs46706640	17	34119320	G/T	G	T			ENSMUSG00000054354	ENSMUST00000067372	AA388235	NON_SYNONYMOUS_CODING	<0.1	benign	1.474	hypothetical protein LOC433100 [Source:RefSeq peptide;Acc:NP_001013815]	R/M	20	TRUE
Tir1	rs50038295	17	34119383	G/A	G	A			ENSMUSG00000054354	ENSMUST00000067372	AA388235	NON_SYNONYMOUS_CODING	<0.1	possibly damaging	1.575	hypothetical protein LOC433100 [Source:RefSeq peptide;Acc:NP_001013815]	G/D	41	TRUE
Tir1	rs51272593	17	34119394	A/G	A	G			ENSMUSG00000054354	ENSMUST00000067372	AA388235	NON_SYNONYMOUS_CODING	<0.1	benign	0.225	hypothetical protein LOC433100 [Source:RefSeq peptide;Acc:NP_001013815]	I/V	45	TRUE
Tir1	rs46685594	17	34119426	G/C	G	C			ENSMUSG00000054354	ENSMUST00000067372	AA388235	NON_SYNONYMOUS_CODING	<0.1	benign	1.35	hypothetical protein LOC433100 [Source:RefSeq peptide;Acc:NP_001013815]	R/S	55	TRUE
Tir1	rs48533363	17	34119460	A/T	A	T	A		ENSMUSG00000054354	ENSMUST00000067372	AA388235	NON_SYNONYMOUS_CODING	<0.1	benign	-0.189	hypothetical protein LOC433100 [Source:RefSeq peptide;Acc:NP_001013815]	T/S	67	FALSE
Tir1	rs48895395	17	34119466	C/T	C	T	C	T	ENSMUSG00000054354	ENSMUST00000067372	0	NON_SYNONYMOUS_CODING	<0.1	0	0	0	R/C	69	FALSE
Tir1	rs51463843	17	34119467	G/A	G	A	G		ENSMUSG00000054354	ENSMUST00000067372	AA388235	NON_SYNONYMOUS_CODING	<0.1	benign	-0.225	hypothetical protein LOC433100 [Source:RefSeq peptide;Acc:NP_001013815]	R/H	69	FALSE
Tir1	rs47173540	17	34119472	T/G	T		T		ENSMUSG00000054354	ENSMUST00000067372	0	NON_SYNONYMOUS_CODING	0.31	0	0	0	F/V	71	FALSE
Tir1	rs49851601	17	34119473	T/C	T	C			ENSMUSG00000054354	ENSMUST00000067372	AA388235	NON_SYNONYMOUS_CODING	0.337	possibly damaging	1.575	hypothetical protein LOC433100 [Source:RefSeq peptide;Acc:NP_001013815]	F/S	71	TRUE
Tir1	rs45732289	17	34119478	G/C	G				ENSMUSG00000054354	ENSMUST00000067372	AA388235	NON_SYNONYMOUS_CODING	0.369	benign	0.225	hypothetical protein LOC433100 [Source:RefSeq peptide;Acc:NP_001013815]	A/P	73	TRUE
Tir1	rs46016319	17	34119481	G/A	G	A			ENSMUSG00000054354	ENSMUST00000067372	AA388235	NON_SYNONYMOUS_CODING	0.4	benign	0.45	hypothetical protein LOC433100 [Source:RefSeq peptide;Acc:NP_001013815]	V/M	74	TRUE
Tir1	rs49868810	17	34119529	G/A	G	G			ENSMUSG00000054354	ENSMUST00000067372	AA388235	NON_SYNONYMOUS_CODING	<0.1	benign	0	hypothetical protein LOC433100 [Source:RefSeq peptide;Acc:NP_001013815]	G/S	90	FALSE
Tir1	rs50711935	17	34119574	C/T	C	T			ENSMUSG00000054354	ENSMUST00000067372	AA388235	NON_SYNONYMOUS_CODING	<0.1	benign	?	hypothetical protein LOC433100 [Source:RefSeq peptide;Acc:NP_001013815]	R/W	105	TRUE
Tir1	rs50457030	17	34119592	A/T/C	A	A		A	ENSMUSG00000054354	ENSMUST00000067372	AA388235	NON_SYNONYMOUS_CODING	<0.1	benign	0	hypothetical protein LOC433100 [Source:RefSeq peptide;Acc:NP_001013815]	M/L/L	111	FALSE
Tir1	rs33490761	17	34133558	C/T	C	T	C		ENSMUSG00000061232	ENSMUST00000025181	0	SPLICE_SITE,INTRONIC	0.335	0	0	0			FALSE
Tir1	rs33344611	17	34134067	C/T	C	T	-	T	ENSMUSG00000061232	ENSMUST00000046131	H2-K1	NON_SYNONYMOUS_CODING	<0.1	benign	0.613	H-2 class I histocompatibility antigen, K-B alpha chain Precursor (H-2K(B)) [Source:UniProtKB/Swiss-Prot;Acc:P01901]	V/I	216	TRUE
Tir1	rs33344611	17	34134067	C/T	C	T	-	T	ENSMUSG00000061232	ENSMUST00000087189	H2-K1	NON_SYNONYMOUS_CODING	<0.1	benign	0.602	H-2 class I histocompatibility antigen, K-B alpha chain Precursor (H-2K(B)) [Source:UniProtKB/Swiss-Prot;Acc:P01901]	V/I	296	TRUE
Tir1	rs33344611	17	34134067	C/T	C	T	-	T	ENSMUSG00000061232	ENSMUST00000114311	H2-K1	NON_SYNONYMOUS_CODING	<0.1	benign	0.494	H-2 class I histocompatibility antigen, K-B alpha chain Precursor (H-2K(B)) [Source:UniProtKB/Swiss-Prot;Acc:P01901]	V/I	310	TRUE
Tir1	rs33344611	17	34134067	C/T	C	T	-	T	ENSMUSG00000061232	ENSMUST00000025181	H2-K1	NON_SYNONYMOUS_CODING	<0.1	benign	0.491	H-2 class I histocompatibility antigen, K-B alpha chain Precursor (H-2K(B)) [Source:UniProtKB/Swiss-Prot;Acc:P01901]	V/I	308	TRUE
Tir1	rs33583118	17	34134069	G/A	G	G	G		ENSMUSG00000061232	ENSMUST00000025181	H2-K1	NON_SYNONYMOUS_CODING	<0.1	benign	0.88	H-2 class I histocompatibility antigen, K-B alpha chain Precursor (H-2K(B)) [Source:UniProtKB/Swiss-Prot;Acc:P01901]	T/I	307	FALSE
Tir1	rs33583118	17	34134069	G/A	G	G	G		ENSMUSG00000061232	ENSMUST00000087189	H2-K1	NON_SYNONYMOUS_CODING	<0.1	benign	0.773	H-2 class I histocompatibility antigen, K-B alpha chain Precursor (H-2K(B)) [Source:UniProtKB/Swiss-Prot;Acc:P01901]	T/I	295	FALSE
Tir1	rs33583118	17	34134069	G/A	G	G	G		ENSMUSG00000061232	ENSMUST00000046131	H2-K1	NON_SYNONYMOUS_CODING	<0.1	benign	0.849	H-2 class I histocompatibility antigen, K-B alpha chain Precursor (H-2K(B)) [Source:UniProtKB/Swiss-Prot;Acc:P01901]	T/I	215	FALSE
Tir1	rs33583118	17	34134069	G/A	G	G	G		ENSMUSG00000061232	ENSMUST00000114311	H2-K1	NON_SYNONYMOUS_CODING	<0.1	benign	0.759	H-2 class I histocompatibility antigen, K-B alpha chain Precursor (H-2K(B)) [Source:UniProtKB/Swiss-Prot;Acc:P01901]	T/I	309	FALSE
Tir1	rs33280712	17	34134075	A/G	A	G			ENSMUSG00000061232	ENSMUST00000046131	H2-K1	NON_SYNONYMOUS_CODING	<0.1	possibly damaging	1.619	H-2 class I histocompatibility antigen, K-B alpha chain Precursor (H-2K(B)) [Source:UniProtKB/Swiss-Prot;Acc:P01901]	M/T	213	TRUE
Tir1	rs33280712	17	34134075	A/G	A	G			ENSMUSG00000061232	ENSMUST00000025181	H2-K1	NON_SYNONYMOUS_CODING	<0.1	possibly damaging	1.575	H-2 class I histocompatibility antigen, K-B alpha chain Precursor (H-2K(B)) [Source:UniProtKB/Swiss-Prot;Acc:P01901]	M/T	305	TRUE
Tir1	rs33280712	17	34134075	A/G	A	G			ENSMUSG00000061232	ENSMUST00000114311	H2-K1	NON_SYNONYMOUS_CODING	<0.1	possibly damaging	1.557	H-2 class I histocompatibility antigen, K-B alpha chain Precursor (H-2K(B)) [Source:UniProtKB/Swiss-Prot;Acc:P01901]	M/T	307	TRUE
Tir1	rs33280712	17	34134075	A/G	A	G			ENSMUSG00000061232	ENSMUST00000087189	H2-K1	NON_SYNONYMOUS_CODING	<0.1	possibly damaging	1.549	H-2 class I histocompatibility antigen, K-B alpha chain Precursor (H-2K(B)) [Source:UniProtKB/Swiss-Prot;Acc:P01901]	M/T	293	TRUE
Tir1	rs49322583	17	34134099	G/A	G	G	G		ENSMUSG00000061232	ENSMUST00000114311	H2-K1	NON_SYNONYMOUS_CODING	0.615	possibly damaging	-0.06	H-2 class I histocompatibility antigen, K-B alpha chain Precursor (H-2K(B)) [Source:UniProtKB/Swiss-Prot;Acc:P01901]	P/L	299	FALSE
Tir1	rs49322583	17	34134099	G/A	G	G	G		ENSMUSG00000061232	ENSMUST00000025181	H2-K1	NON_SYNONYMOUS_CODING	0.615	possibly damaging	-0.057	H-2 class I histocompatibility antigen, K-B alpha chain Precursor (H-2K(B)) [Source:UniProtKB/Swiss-Prot;Acc:P01901]	P/L	297	FALSE
Tir1	rs49322583	17	34134099	G/A	G	G	G		ENSMUSG00000061232	ENSMUST00000046131	H2-K1	NON_SYNONYMOUS_CODING	0.615	possibly damaging	0.001	H-2 class I histocompatibility antigen, K-B alpha chain Precursor (H-2K(B)) [Source:UniProtKB/Swiss-Prot;Acc:P01901]	P/L	205	FALSE
Tir1	rs49322583	17	34134099	G/A	G	G	G		ENSMUSG00000061232	ENSMUST00000087189	H2-K1	NON_SYNONYMOUS_CODING	0.615	possibly damaging	0.1	H-2 class I histocompatibility antigen, K-B alpha chain Precursor (H-2K(B)) [Source:UniProtKB/Swiss-Prot;Acc:P01901]	P/L	285	FALSE
Tir1	rs52050947	17	34134463	T/C	T				ENSMUSG00000061232	ENSMUST00000025181	H2-K1	NON_SYNONYMOUS_CODING	<0.1	benign	0.45	H-2 class I histocompatibility antigen, K-B alpha chain Precursor (H-2K(B)) [Source:UniProtKB/Swiss-Prot;Acc:P01901]	D/G	218	TRUE
Tir1	rs52050947	17	34134463	T/C	T				ENSMUSG00000061232	ENSMUST00000114311	H2-K1	NON_SYNONYMOUS_CODING	<0.1	benign	0.45	H-2 class I histocompatibility antigen, K-B alpha chain Precursor (H-2K(B)) [Source:UniProtKB/Swiss-Prot;Acc:P01901]	D/G	220	TRUE
Tir1	rs52050947	17	34134463	T/C	T				ENSMUSG00000061232	ENSMUST00000087189	H2-K1	NON_SYNONYMOUS_CODING	<0.1	benign	0.442	H-2 class I histocompatibility antigen, K-B alpha chain Precursor (H-2K(B)) [Source:UniProtKB/Swiss-Prot;Acc:P01901]	D/G	206	TRUE
Tir1	rs52050947	17	34134463	T/C	T				ENSMUSG00000061232	ENSMUST00000046131	H2-K1	NON_SYNONYMOUS_CODING	<0.1	benign	0.328	H-2 class I histocompatibility antigen, K-B alpha chain Precursor (H-2K(B)) [Source:UniProtKB/Swiss-Prot;Acc:P01901]	D/G	126	TRUE
Tir1	Sudbery et al 2009	17	34134481	T/C	T	C		C	ENSMUST00000046131	ENSMUSG00000061232	MGI95904	NON_SYNONYMOUS_CODING	<0.1	possibly damaging	1.502	histocompatibility 2, K1, K region Gene [Source:MGI Symbol;Acc:MGI:95904]	H/R		TRUE
Tir1	rs33293753	17	34134481	T/C	T	C			ENSMUSG00000061232	ENSMUST00000046131	H2-K1	NON_SYNONYMOUS_CODING	<0.1	possibly damaging	1.624	H-2 class I histocompatibility antigen, K-B alpha chain Precursor (H-2K(B)) [Source:UniProtKB/Swiss-Prot;Acc:P01901]	H/R	120	TRUE
Tir1	rs33293753	17	34134481	T/C	T	C			ENSMUSG00000061232	ENSMUST00000025181	H2-K1	NON_SYNONYMOUS_CODING	<0.1	possibly damaging	1.502	H-2 class I histocompatibility antigen, K-B alpha chain Precursor (H-2K(B)) [Source:UniProtKB/Swiss-Prot;Acc:P01901]	H/R	212	TRUE
Tir1	rs33293753	17	34134481	T/C	T	C			ENSMUSG00000061232	ENSMUST00000087189	H2-K1	NON_SYNONYMOUS_CODING	<0.1	possibly damaging	1.502	H-2 class I histocompatibility antigen, K-B alpha chain Precursor (H-2K(B)) [Source:UniProtKB/Swiss-Prot;Acc:P01901]	H/R	200	TRUE
Tir1	rs33293753	17	34134481	T/C	T	C			ENSMUSG00000061232	ENSMUST00000114311	H2-K1	NON_SYNONYMOUS_CODING	<0.1	possibly damaging	1.502	H-2 class I histocompatibility antigen, K-B alpha chain Precursor (H-2K(B)) [Source:UniProtKB/Swiss-Prot;Acc:P01901]	H/R	214	TRUE
Tir1	rs50410315	17	34136224	A/G	A		A		ENSMUSG00000061232	ENSMUST00000087189	H2-K1	NON_SYNONYMOUS_CODING	0.972	benign	0.244	H-2 class I histocompatibility antigen, K-B alpha chain Precursor (H-2K(B)) [Source:UniProtKB/Swiss-Prot;Acc:P01901]	L/P	189	FALSE
Tir1	rs50410315	17	34136224	A/G	A		A		ENSMUSG00000061232	ENSMUST00000114311	H2-K1	NON_SYNONYMOUS_CODING	0.972	benign	0.287	H-2 class I histocompatibility antigen, K-B alpha chain Precursor (H-2K(B)) [Source:UniProtKB/Swiss-Prot;Acc:P01901]	L/P	203	FALSE
Tir1	rs50410315	17	34136224	A/G	A		A		ENSMUSG00000061232	ENSMUST00000025181	H2-K1	NON_SYNONYMOUS_CODING	0.972	benign	0.311	H-2 class I histocompatibility antigen, K-B alpha chain Precursor (H-2K(B)) [Source:UniProtKB/Swiss-Prot;Acc:P01901]	L/P	201	FALSE
Tir1	rs47645309	17	34136307	T/A	T		T	T	ENSMUSG00000061232	ENSMUST00000025181	H2-K1	NON_SYNONYMOUS_CODING	<0.1	benign	0.057	H-2 class I histocompatibility antigen, K-B alpha chain Precursor (H-2K(B)) [Source:UniProtKB/Swiss-Prot;Acc:P01901]	E/D	173	FALSE
Tir1	rs47645309	17	34136307	T/A	T		T	T	ENSMUSG00000061232	ENSMUST00000114311	H2-K1	NON_SYNONYMOUS_CODING	<0.1	benign	0.064	H-2 class I histocompatibility antigen, K-B alpha chain Precursor (H-2K(B)) [Source:UniProtKB/Swiss-Prot;Acc:P01901]	E/D	175	FALSE
Tir1	rs47645309	17	34136307	T/A	T		T	T	ENSMUSG00000061232	ENSMUST00000087189	H2-K1	NON_SYNONYMOUS_CODING	<0.1	benign	0.18	H-2 class I histocompatibility antigen, K-B alpha chain Precursor (H-2K(B)) [Source:UniProtKB/Swiss-Prot;Acc:P01901]	E/D	161	FALSE
Tir1	rs8237941	17	34136444	C/A			C	A	ENSMUSG00000061232	ENSMUST00000087189	H2-K1	NON_SYNONYMOUS_CODING	0.993	benign	1.663	H-2 class I histocompatibility antigen, K-B alpha chain Precursor (H-2K(B)) [Source:UniProtKB/Swiss-Prot;Acc:P01901]	G/W	116	FALSE
Tir1	rs8237941	17	34136444	C/A			C	A	ENSMUSG00000061232	ENSMUST00000025181	H2-K1	NON_SYNONYMOUS_CODING	0.993	benign	1.715	H-2 class I histocompatibility antigen, K-B alpha chain Precursor (H-2K(B)) [Source:UniProtKB/Swiss-Prot;Acc:P01901]	G/W	128	FALSE
Tir1	rs8237941	17	34136444	C/A			C	A	ENSMUSG00000061232	ENSMUST00000114311	H2-K1	NON_SYNONYMOUS_CODING	0.993	benign	1.715	H-2 class I histocompatibility antigen, K-B alpha chain Precursor (H-2K(B)) [Source:UniProtKB/Swiss-Prot;Acc:P01901]	G/W	130	FALSE
Tir1	rs8237942	17	34136452	C/T		C	T	C	ENSMUSG00000061232	ENSMUST00000025181	H2-K1	NON_SYNONYMOUS_CODING	0.992	possibly damaging	0.881	H-2 class I histocompatibility antigen, K-B alpha chain Precursor (H-2K(B)) [Source:UniProtKB/Swiss-Prot;Acc:P01901]	G/E	125	TRUE
Tir1	rs8237942	17	34136452	C/T		C	T	C	ENSMUSG00000061232	ENSMUST00000087189	H2-K1	NON_SYNONYMOUS_CODING	0.992	possibly damaging	0.881	H-2 class I histocompatibility antigen, K-B alpha chain Precursor (H-2K(B)) [Source:UniProtKB/Swiss-Prot;Acc:P01901]	G/E	113	TRUE
Tir1	rs8237942	17	34136452	C/T		C	T	C	ENSMUSG00000061232	ENSMUST00000114311	H2-K1	NON_SYNONYMOUS_CODING	0.992	possibly damaging	0.881	H-2 class I histocompatibility antigen, K-B alpha chain Precursor (H-2K(B)) [Source:UniProtKB/Swiss-Prot;Acc:P01901]	G/E	127	TRUE
Tir1	rs8237951	17	34136495	C/T		C	C	C	ENSMUSG00000061232	ENSMUST00000025181		SPLICE_SITE,INTRONIC	0.916						TRUE
Tir1	rs8237968	17	34136684	T/G	T				ENSMUSG00000061232	ENSMUST00000025181	0	NON_SYNONYMOUS_CODING	0.978	0	0	0	K/T	110	TRUE
Tir1	rs8237968	17	34136684	T/G	T				ENSMUSG00000061232	ENSMUST00000046131	0	NON_SYNONYMOUS_CODING	0.978	0	0	0	K/T	110	TRUE
Tir1	rs8237968	17	34136684	T/G	T				ENSMUSG00000061232	ENSMUST00000087189	0	NON_SYNONYMOUS_CODING	0.978	0	0	0	K/T	98	TRUE
Tir1	Sudbery et al 2009	17	34136685	T/C	T	C	C		ENSMUST00000046131	ENSMUSG00000061232	MGI95904	NON_SYNONYMOUS_CODING	0.981	benign	0.706	histocompatibility 2, K1, K region Gene [Source:MGI Symbol;Acc:MGI:95904]	K/E		TRUE
Tir1	rs8237969	17	34136685	T/C	T				ENSMUSG00000061232	ENSMUST00000087189	H2-K1	NON_SYNONYMOUS_CODING	0.981	benign	1.356	H-2 class I histocompatibility antigen, K-B alpha chain Precursor (H-2K(B)) [Source:UniProtKB/Swiss-Prot;Acc:P01901]	K/E	98	TRUE
Tir1	rs8237969	17	34136685	T/C	T				ENSMUSG00000061232	ENSMUST00000025181	H2-K1	NON_SYNONYMOUS_CODING	0.981	benign	0.708	H-2 class I histocompatibility antigen, K-B alpha chain Precursor (H-2K(B)) [Source:UniProtKB/Swiss-Prot;Acc:P01901]	K/E	110	TRUE
Tir1	rs8237969	17	34136685	T/C	T				ENSMUSG00000061232	ENSMUST00000046131	H2-K1	NON_SYNONYMOUS_CODING	0.981	benign	0.049	H-2 class I histocompatibility antigen, K-B alpha chain Precursor (H-2K(B)) [Source:UniProtKB/Swiss-Prot;Acc:P01901]	K/E	110	TRUE
Tir1	Sudbery et al 2009	17	34136703	C/G	C			G	ENSMUST00000046131	ENSMUSG00000061232	MGI95904	NON_SYNONYMOUS_CODING	0.983	benign	0.005	histocompatibility 2, K1, K region Gene [Source:MGI Symbol;Acc:MGI:95904]	G/R		TRUE
Tir1	ENSMUSSNP4731881	17	34136720	T/C	T	T			ENSMUSG00000061232	ENSMUST00000025181	0	NON_SYNONYMOUS_CODING	0.945	0	0	0	D/G	98	FALSE
Tir1	ENSMUSSNP4731881	17	34136720	T/C	T	T			ENSMUSG00000061232	ENSMUST00000046131	0	NON_SYNONYMOUS_CODING	0.945	0	0	0	D/G	98	FALSE
Tir1	ENSMUSSNP4731881	17	34136720	T/C	T	T			ENSMUSG00000061232	ENSMUST00000087189	0	NON_SYNONYMOUS_CODING	0.945	0	0	0	D/G	86	FALSE
Tir1	ENSMUSSNP505202	17	34136721	C/T	C	C	C		ENSMUSG00000061232	ENSMUST00000025181	H2-K1	NON_SYNONYMOUS_CODING	0.947	benign	1.264	H-2 class I histocompatibility antigen, K-B alpha chain Precursor (H-2K(B)) [Source:UniProtKB/Swiss-Prot;Acc:P01901]	D/N	98	FALSE
Tir1	ENSMUSSNP505202	17	34136721	C/T	C	C	C		ENSMUSG00000061232	ENSMUST00000087189	H2-K1	NON_SYNONYMOUS_CODING	0.947	benign	1.245	H-2 class I histocompatibility antigen, K-B alpha chain Precursor (H-2K(B)) [Source:UniProtKB/Swiss-Prot;Acc:P01901]	D/N	86	FALSE
Tir1	ENSMUSSNP505202	17	34136721	C/T	C	C	C		ENSMUSG00000061232	ENSMUST00000046131	H2-K1	NON_SYNONYMOUS_CODING	0.947	benign	0.532	H-2 class I histocompatibility antigen, K-B alpha chain Precursor (H-2K(B)) [Source:UniProtKB/Swiss-Prot;Acc:P01901]	D/N	98	FALSE
Tir1	Sudbery et al 2009	17	34136753	T/C	T		C		ENSMUST00000046131	ENSMUSG00000061232	MGI95904	NON_SYNONYMOUS_CODING	<0.1	benign	0.195	histocompatibility 2, K1, K region Gene [Source:MGI Symbol;Acc:MGI:95904]	K/R		TRUE
Tir1	rs13464215	17	34136828	T/C	T	T		T	ENSMUSG00000061232	ENSMUST00000025181	0	NON_SYNONYMOUS_CODING	0.68	0	0	0	E/G	62	FALSE
Tir1	rs13464215	17	34136828	T/C	T	T		T	ENSMUSG00000061232	ENSMUST00000046131	0	NON_SYNONYMOUS_CODING	0.68	0	0	0	E/G	62	FALSE
Tir1	rs13464215	17	34136828	T/C	T	T		T	ENSMUSG00000061232	ENSMUST00000087189	0	NON_SYNONYMOUS_CODING	0.68	0	0	0	E/G	50	FALSE
Tir1	rs51419043	17	34136895	C/T	C				ENSMUSG00000061232	ENSMUST00000025181	H2-K1	NON_SYNONYMOUS_CODING	0.998	benign	0.956	H-2 class I histocompatibility antigen, K-B alpha chain Precursor (H-2K(B)) [Source:UniProtKB/Swiss-Prot;Acc:P01901]	E/K	40	TRUE
Tir1	rs48191051	17	34136924	A/T	A				ENSMUSG00000061232	ENSMUST00000025181	0	NON_SYNONYMOUS_CODING	0.992	0	0	0	V/D	30	TRUE
Tir1	rs50858013	17	34136925	C/G	C				ENSMUSG00000061232	ENSMUST00000046131	H2-K1	NON_SYNONYMOUS_CODING	0.991	benign	0.712	H-2 class I histocompatibility antigen, K-B alpha chain Precursor (H-2K(B)) [Source:UniProtKB/Swiss-Prot;Acc:P01901]	V/L	30	TRUE
Tir1	rs50858013	17	34136925	C/G	C				ENSMUSG00000061232	ENSMUST00000025181	H2-K1	NON_SYNONYMOUS_CODING	0.991	benign	0.289	H-2 class I histocompatibility antigen, K-B alpha chain Precursor (H-2K(B)) [Source:UniProtKB/Swiss-Prot;Acc:P01901]	V/L	30	TRUE
Tir1	rs50858013	17	34136925	C/G	C				ENSMUSG00000061232	ENSMUST00000087189		SPLICE_SITE,INTRONIC	0.991						TRUE
Tir1	ENSMUSSNP843945	17	34136987	A/G	A			A	ENSMUSG00000061232	ENSMUST00000087189	H2-K1	NON_SYNONYMOUS_CODING	<0.1	benign	0	H-2 class I histocompatibility antigen, K-B alpha chain Precursor (H-2K(B)) [Source:UniProtKB/Swiss-Prot;Acc:P01901]	L/P	29	FALSE
Tir1	Sudbery et al 2009	17	34137158	A/G	A	G	G	G	ENSMUST00000046131	ENSMUSG00000061232	MGI95904	SYNONYMOUS_CODING	0.742			histocompatibility 2, K1, K region Gene [Source:MGI Symbol;Acc:MGI:95904]	A		TRUE
Tir1	rs46334066	17	34137189	G/A	G	A	G		ENSMUSG00000061232	ENSMUST00000025181	H2-K1	NON_SYNONYMOUS_CODING	<0.1	benign	0.95	H-2 class I histocompatibility antigen, K-B alpha chain Precursor (H-2K(B)) [Source:UniProtKB/Swiss-Prot;Acc:P01901]	T/M	5	FALSE
Tir1	Sudbery et al 2009	17	34137194	C/G	C		G		ENSMUST00000046131	ENSMUSG00000061232	MGI95904	SYNONYMOUS_CODING	<0.1			histocompatibility 2, K1, K region Gene [Source:MGI Symbol;Acc:MGI:95904]	P		TRUE
Tir1	Sudbery et al 2009	17	34137198	A/G	A		G		ENSMUST00000046131	ENSMUSG00000061232	MGI95904	NON_SYNONYMOUS_CODING	<0.1	benign	0.604	histocompatibility 2, K1, K region Gene [Source:MGI Symbol;Acc:MGI:95904]	V/A		TRUE
Tir1	rs49568909	17	34137198	A/G	A	G			ENSMUSG00000061232	ENSMUST00000025181	H2-K1	NON_SYNONYMOUS_CODING	<0.1	benign	0.608	H-2 class I histocompatibility antigen, K-B alpha chain Precursor (H-2K(B)) [Source:UniProtKB/Swiss-Prot;Acc:P01901]	V/A	2	TRUE
Tir1	Sudbery et al 2009	17	34137208	C/T	C		T		ENSMUST00000114311	ENSMUSG00000061232	MGI95904	5PRIME_UTR	<0.1			histocompatibility 2, K1, K region Gene [Source:MGI Symbol;Acc:MGI:95904]	0		TRUE
Tir1	Sudbery et al 2009	17	34158730	G/A	G			A	ENSMUST00000025183	ENSMUSG00000024325	MGI1101770	SYNONYMOUS_CODING	0.226			ring finger protein 1 Gene [Source:MGI Symbol;Acc:MGI:1101770]	A		TRUE
Tir1	rs49854621	17	34158807	T/C	T	C			ENSMUSG00000024325	ENSMUST00000025183	Ring1	NON_SYNONYMOUS_CODING	<0.1	benign	?	E3 ubiquitin-protein ligase RING1 (EC 6.3.2.-)(RING finger protein 1)(Polycomb complex protein RING1)(Transcription repressor Ring1A) [Source:UniProtKB/Swiss-Prot;Acc:O35730]	T/A	314	TRUE
Tir1	Sudbery et al 2009	17	34158807	T/C	T	C		C	ENSMUST00000025183	ENSMUSG00000024325	MGI1101770	NON_SYNONYMOUS_CODING	<0.1			ring finger protein 1 Gene [Source:MGI Symbol;Acc:MGI:1101770]	T/A		TRUE
Tir1	Sudbery et al 2009	17	34158808	G/C	G	C		C	ENSMUST00000025183	ENSMUSG00000024325	MGI1101770	SYNONYMOUS_CODING	<0.1			ring finger protein 1 Gene [Source:MGI Symbol;Acc:MGI:1101770]	T		TRUE
Tir1	rs29538025	17	34164427	G/C	G	C	G		ENSMUSG00000073422	ENSMUST00000114303	H2-Ke6	NON_SYNONYMOUS_CODING	1	probably damaging	-0.577	Estradiol 17-beta-dehydrogenase 8 (EC 1.1.1.62)(Testosterone 17-beta-dehydrogenase 8)(EC 1.1.1.63)(17-beta-hydroxysteroid dehydrogenase 8)(17-beta-HSD 8)(Protein Ke6)(Ke-6) [Source:UniProtKB/Swiss-Prot;Acc:P50171]	A/G	102	FALSE
Tir1	rs29538025	17	34164427	G/C	G	C	G		ENSMUSG00000073422	ENSMUST00000045467	H2-Ke6	NON_SYNONYMOUS_CODING	1	probably damaging	-0.57	Estradiol 17-beta-dehydrogenase 8 (EC 1.1.1.62)(Testosterone 17-beta-dehydrogenase 8)(EC 1.1.1.63)(17-beta-hydroxysteroid dehydrogenase 8)(17-beta-HSD 8)(Protein Ke6)(Ke-6) [Source:UniProtKB/Swiss-Prot;Acc:P50171]	A/G	103	FALSE
Tir1	Sudbery et al 2009	17	34164427	G/C	G	C		C	ENSMUST00000045467	ENSMUSG00000073422	MGI95911	NON_SYNONYMOUS_CODING	1			H2-K region expressed gene 6 Gene [Source:MGI Symbol;Acc:MGI:95911]	0		TRUE
Tir1	rs13469135	17	34164576	C/G	C	C	C	C	ENSMUSG00000073422	ENSMUST00000045467	H2-Ke6	NON_SYNONYMOUS_CODING	0.998	benign	0.8	Estradiol 17-beta-dehydrogenase 8 (EC 1.1.1.62)(Testosterone 17-beta-dehydrogenase 8)(EC 1.1.1.63)(17-beta-hydroxysteroid dehydrogenase 8)(17-beta-HSD 8)(Protein Ke6)(Ke-6) [Source:UniProtKB/Swiss-Prot;Acc:P50171]	E/Q	87	FALSE
Tir1	rs13469135	17	34164576	C/G	C	C	C	C	ENSMUSG00000073422	ENSMUST00000114303	H2-Ke6	NON_SYNONYMOUS_CODING	0.998	benign	0.727	Estradiol 17-beta-dehydrogenase 8 (EC 1.1.1.62)(Testosterone 17-beta-dehydrogenase 8)(EC 1.1.1.63)(17-beta-hydroxysteroid dehydrogenase 8)(17-beta-HSD 8)(Protein Ke6)(Ke-6) [Source:UniProtKB/Swiss-Prot;Acc:P50171]	E/Q	86	FALSE
Tir1	ss159819951	17	34165995	C/T	C	T		T	ENSMUSG00000024327	ENSMUST00000025186	Slc39a7	NON_SYNONYMOUS_CODING	0.939	benign	1.204	Zinc transporter SLC39A7 (Solute carrier family 39 member 7)(Histidine-rich membrane protein Ke4) [Source:UniProtKB/Swiss-Prot;Acc:Q31125]	V/M	393	TRUE
Tir1	ss159819959	17	34167349	C/T	C	T	T	T	ENSMUSG00000024327	ENSMUST00000025186	Slc39a7	NON_SYNONYMOUS_CODING	0.558	benign	0.325	Zinc transporter SLC39A7 (Solute carrier family 39 member 7)(Histidine-rich membrane protein Ke4) [Source:UniProtKB/Swiss-Prot;Acc:Q31125]	A/T	208	TRUE
Tir1	rs29537070	17	34169377	G/T	G	T			ENSMUSG00000039656	ENSMUST00000044956	Rxrb	NON_SYNONYMOUS_CODING	<0.1	benign	?	Retinoic acid receptor RXR-beta (Retinoid X receptor beta)(Nuclear receptor subfamily 2 group B member 2)(MHC class I regulatory element-binding protein H-2RIIBP) [Source:UniProtKB/Swiss-Prot;Acc:P28704]	V/L	120	TRUE
Tir1	Sudbery et al 2009	17	34169377	G/T	G	T			ENSMUST00000044956	ENSMUSG00000039656	MGI98215	5PRIME_UTR	<0.1			retinoid X receptor beta Gene [Source:MGI Symbol;Acc:MGI:98215]	0		TRUE
Tir1	ss159819992	17	34180179	A/G	A	G			ENSMUSG00000024330	ENSMUST00000076926		SPLICE_SITE,SYNONYMOUS_CODING	0.971				K	148	TRUE
Tir1	Sudbery et al 2009	17	34180179	A/G	A		G		ENSMUST00000114250	ENSMUSG00000024330	Col11a2-001	SYNONYMOUS_CODING	0.971			collagen, type XI, alpha 2 Gene [Source:MGI (curated);Acc:Col11a2-001]	0		TRUE
Tir1	rs51606661	17	34180349	C/T	A	-	C	-	ENSMUSG00000024330	ENSMUST00000076926	0	SPLICE_SITE,INTRONIC	<0.1	0	0	0			TRUE
Tir1	ss159820001	17	34181963	G/A	G	A	A	A	ENSMUSG00000024330	ENSMUST00000076926	0	SPLICE_SITE,INTRONIC	<0.1	0	0	0			TRUE
Tir1	ss159820031	17	34187895	C/T	C	T			ENSMUSG00000024330	ENSMUST00000076926	0	SPLICE_SITE,INTRONIC	0.603	0	0	0			TRUE
Tir1	Sudbery et al 2009	17	34188588	T/C	T		C		ENSMUST00000114250	ENSMUSG00000024330	Col11a2-001	SYNONYMOUS_CODING	0.987			collagen, type XI, alpha 2 Gene [Source:MGI (curated);Acc:Col11a2-001]	G		TRUE
Tir1	rs51544304	17	34188746	A/G	A	G	G	G	ENSMUSG00000024330	ENSMUST00000076926	Col11a2	NON_SYNONYMOUS_CODING	0.979	benign	0.735	Collagen alpha-2(XI) chain Precursor [Source:UniProtKB/Swiss-Prot;Acc:Q64739]	M/V	554	TRUE
Tir1	rs51544304	17	34188746	A/G	A	G	G	G	ENSMUSG00000024330	ENSMUST00000114258	Col11a2	NON_SYNONYMOUS_CODING	0.979	benign	0.732	Collagen alpha-2(XI) chain Precursor [Source:UniProtKB/Swiss-Prot;Acc:Q64739]	M/V	533	TRUE
Tir1	rs51544304	17	34188746	A/G	A	G	G	G	ENSMUSG00000024330	ENSMUST00000114257	Col11a2	NON_SYNONYMOUS_CODING	0.979	benign	0.722	Collagen alpha-2(XI) chain Precursor [Source:UniProtKB/Swiss-Prot;Acc:Q64739]	M/V	528	TRUE
Tir1	rs51544304	17	34188746	A/G	A	G	G	G	ENSMUSG00000024330	ENSMUST00000087497	Col11a2	NON_SYNONYMOUS_CODING	0.979	benign	0.654	Collagen alpha-2(XI) chain Precursor [Source:UniProtKB/Swiss-Prot;Acc:Q64739]	M/V	468	TRUE
Tir1	rs51544304	17	34188746	A/G	A	G	G	G	ENSMUSG00000024330	ENSMUST00000114250	Col11a2	NON_SYNONYMOUS_CODING	0.979	benign	0.654	Collagen alpha-2(XI) chain Precursor [Source:UniProtKB/Swiss-Prot;Acc:Q64739]	M/V	447	TRUE
Tir1	rs51544304	17	34188746	A/G	A	G	G	G	ENSMUSG00000024330	ENSMUST00000114255	Col11a2	NON_SYNONYMOUS_CODING	0.979	benign	0.479	Collagen alpha-2(XI) chain Precursor [Source:UniProtKB/Swiss-Prot;Acc:Q64739]	M/V	507	TRUE
Tir1	rs51544304	17	34188746	A/G	A	G	G	G	ENSMUSG00000024330	ENSMUST00000114252	Col11a2	NON_SYNONYMOUS_CODING	0.979	benign	0.427	Collagen alpha-2(XI) chain Precursor [Source:UniProtKB/Swiss-Prot;Acc:Q64739]	M/V	473	TRUE
Tir1	Sudbery et al 2009	17	34191100	G/C	G	C		C	ENSMUST00000114250	ENSMUSG00000024330	Col11a2-001	SYNONYMOUS_CODING	0.792			collagen, type XI, alpha 2 Gene [Source:MGI (curated);Acc:Col11a2-001]	P		TRUE
Tir1	Sudbery et al 2009	17	34191103	C/A	C	A		A	ENSMUST00000114250	ENSMUSG00000024330	Col11a2-001	SYNONYMOUS_CODING	0.979			collagen, type XI, alpha 2 Gene [Source:MGI (curated);Acc:Col11a2-001]	S		TRUE
Tir1	ss159820049	17	34191784	C/T	C	T		T	ENSMUSG00000024330	ENSMUST00000076926		SPLICE_SITE,SYNONYMOUS_CODING	0.866				G	739	TRUE
Tir1	ss159820049	17	34191784	C/T	C	T		T	ENSMUSG00000024330	ENSMUST00000087497		SPLICE_SITE,SYNONYMOUS_CODING	0.866				G	653	TRUE
Tir1	ss159820049	17	34191784	C/T	C	T		T	ENSMUSG00000024330	ENSMUST00000114250		SPLICE_SITE,SYNONYMOUS_CODING	0.866				G	632	TRUE
Tir1	ss159820049	17	34191784	C/T	C	T		T	ENSMUSG00000024330	ENSMUST00000114252		SPLICE_SITE,SYNONYMOUS_CODING	0.866				G	658	TRUE
Tir1	ss159820049	17	34191784	C/T	C	T		T	ENSMUSG00000024330	ENSMUST00000114255		SPLICE_SITE,SYNONYMOUS_CODING	0.866				G	692	TRUE
Tir1	ss159820049	17	34191784	C/T	C	T		T	ENSMUSG00000024330	ENSMUST00000114257		SPLICE_SITE,SYNONYMOUS_CODING	0.866				G	713	TRUE
Tir1	ss159820049	17	34191784	C/T	C	T		T	ENSMUSG00000024330	ENSMUST00000114258		SPLICE_SITE,SYNONYMOUS_CODING	0.866				G	718	TRUE
Tir1	rs51326043	17	34193028	A/G	A	A	A	A	ENSMUSG00000024330	ENSMUST00000076926	Col11a2	NON_SYNONYMOUS_CODING	1	probably damaging	-0.582	Collagen alpha-2(XI) chain Precursor [Source:UniProtKB/Swiss-Prot;Acc:Q64739]	Y/C	803	FALSE
Tir1	rs51326043	17	34193028	A/G	A	A	A	A	ENSMUSG00000024330	ENSMUST00000087497	Col11a2	NON_SYNONYMOUS_CODING	1	probably damaging	-0.582	Collagen alpha-2(XI) chain Precursor [Source:UniProtKB/Swiss-Prot;Acc:Q64739]	Y/C	717	FALSE
Tir1	rs51326043	17	34193028	A/G	A	A	A	A	ENSMUSG00000024330	ENSMUST00000114252	Col11a2	NON_SYNONYMOUS_CODING	1	probably damaging	-0.582	Collagen alpha-2(XI) chain Precursor [Source:UniProtKB/Swiss-Prot;Acc:Q64739]	Y/C	722	FALSE
Tir1	rs51326043	17	34193028	A/G	A	A	A	A	ENSMUSG00000024330	ENSMUST00000114255	Col11a2	NON_SYNONYMOUS_CODING	1	probably damaging	-0.582	Collagen alpha-2(XI) chain Precursor [Source:UniProtKB/Swiss-Prot;Acc:Q64739]	Y/C	756	FALSE
Tir1	rs51326043	17	34193028	A/G	A	A	A	A	ENSMUSG00000024330	ENSMUST00000114257	Col11a2	NON_SYNONYMOUS_CODING	1	probably damaging	-0.582	Collagen alpha-2(XI) chain Precursor [Source:UniProtKB/Swiss-Prot;Acc:Q64739]	Y/C	777	FALSE
Tir1	rs51326043	17	34193028	A/G	A	A	A	A	ENSMUSG00000024330	ENSMUST00000114258	Col11a2	NON_SYNONYMOUS_CODING	1	probably damaging	-0.582	Collagen alpha-2(XI) chain Precursor [Source:UniProtKB/Swiss-Prot;Acc:Q64739]	Y/C	782	FALSE
Tir1	rs51326043	17	34193028	A/G	A	A	A	A	ENSMUSG00000024330	ENSMUST00000114250	Col11a2	NON_SYNONYMOUS_CODING	1	probably damaging	-0.528	Collagen alpha-2(XI) chain Precursor [Source:UniProtKB/Swiss-Prot;Acc:Q64739]	Y/C	696	FALSE
Tir1	Sudbery et al 2009	17	34193029	T/C	T		C		ENSMUST00000114250	ENSMUSG00000024330	Col11a2-001	SYNONYMOUS_CODING	0.997			collagen, type XI, alpha 2 Gene [Source:MGI (curated);Acc:Col11a2-001]	Y		TRUE
Tir1	Sudbery et al 2009	17	34195857	G/A	G	A		A	ENSMUST00000114250	ENSMUSG00000024330	Col11a2-001	NON_SYNONYMOUS_CODING	0.995	benign	?	collagen, type XI, alpha 2 Gene [Source:MGI (curated);Acc:Col11a2-001]	A/T		TRUE
Tir1	ENSMUSSNP6670506	17	34195857	G/A	G	A			ENSMUSG00000024330	ENSMUST00000087497	Col11a2	NON_SYNONYMOUS_CODING	0.995	benign	?	Collagen alpha-2(XI) chain Precursor [Source:UniProtKB/Swiss-Prot;Acc:Q64739]	A/T	958	TRUE
Tir1	ENSMUSSNP6670506	17	34195857	G/A	G	A			ENSMUSG00000024330	ENSMUST00000114250	Col11a2	NON_SYNONYMOUS_CODING	0.995	benign	?	Collagen alpha-2(XI) chain Precursor [Source:UniProtKB/Swiss-Prot;Acc:Q64739]	A/T	937	TRUE
Tir1	ENSMUSSNP6670506	17	34195857	G/A	G	A			ENSMUSG00000024330	ENSMUST00000114252	Col11a2	NON_SYNONYMOUS_CODING	0.995	benign	?	Collagen alpha-2(XI) chain Precursor [Source:UniProtKB/Swiss-Prot;Acc:Q64739]	A/T	963	TRUE
Tir1	ENSMUSSNP6670506	17	34195857	G/A	G	A			ENSMUSG00000024330	ENSMUST00000114255	Col11a2	NON_SYNONYMOUS_CODING	0.995	benign	?	Collagen alpha-2(XI) chain Precursor [Source:UniProtKB/Swiss-Prot;Acc:Q64739]	A/T	997	TRUE
Tir1	ENSMUSSNP6670506	17	34195857	G/A	G	A			ENSMUSG00000024330	ENSMUST00000114257	Col11a2	NON_SYNONYMOUS_CODING	0.995	benign	?	Collagen alpha-2(XI) chain Precursor [Source:UniProtKB/Swiss-Prot;Acc:Q64739]	A/T	1018	TRUE
Tir1	ENSMUSSNP6670506	17	34195857	G/A	G	A			ENSMUSG00000024330	ENSMUST00000076926	Col11a2	NON_SYNONYMOUS_CODING	0.995	benign	0.9	Collagen alpha-2(XI) chain Precursor [Source:UniProtKB/Swiss-Prot;Acc:Q64739]	A/T	1044	TRUE
Tir1	ENSMUSSNP6670506	17	34195857	G/A	G	A			ENSMUSG00000024330	ENSMUST00000114258	Col11a2	NON_SYNONYMOUS_CODING	0.995	benign	0.9	Collagen alpha-2(XI) chain Precursor [Source:UniProtKB/Swiss-Prot;Acc:Q64739]	A/T	1023	TRUE
Tir1	Sudbery et al 2009	17	34195859	A/G	A	G		G	ENSMUST00000114250	ENSMUSG00000024330	Col11a2-001	SYNONYMOUS_CODING	0.996			collagen, type XI, alpha 2 Gene [Source:MGI (curated);Acc:Col11a2-001]	A		TRUE
Tir1	ss159820061	17	34196012	C/T	C	T		T	ENSMUSG00000024330	ENSMUST00000076926		SPLICE_SITE,SYNONYMOUS_CODING	0.981				G	1051	TRUE
Tir1	ss159820061	17	34196012	C/T	C	T		T	ENSMUSG00000024330	ENSMUST00000087497		SPLICE_SITE,SYNONYMOUS_CODING	0.981				G	965	TRUE
Tir1	ss159820061	17	34196012	C/T	C	T		T	ENSMUSG00000024330	ENSMUST00000114250		SPLICE_SITE,SYNONYMOUS_CODING	0.981				G	944	TRUE
Tir1	ss159820061	17	34196012	C/T	C	T		T	ENSMUSG00000024330	ENSMUST00000114252		SPLICE_SITE,SYNONYMOUS_CODING	0.981				G	970	TRUE
Tir1	ss159820061	17	34196012	C/T	C	T		T	ENSMUSG00000024330	ENSMUST00000114255		SPLICE_SITE,SYNONYMOUS_CODING	0.981				G	1004	TRUE
Tir1	ss159820061	17	34196012	C/T	C	T		T	ENSMUSG00000024330	ENSMUST00000114257		SPLICE_SITE,SYNONYMOUS_CODING	0.981				G	1025	TRUE
Tir1	ss159820061	17	34196012	C/T	C	T		T	ENSMUSG00000024330	ENSMUST00000114258		SPLICE_SITE,SYNONYMOUS_CODING	0.981				G	1030	TRUE
Tir1	Sudbery et al 2009	17	34196243	A/G	A			G	ENSMUST00000114250	ENSMUSG00000024330	Col11a2-001	SYNONYMOUS_CODING	0.998			collagen, type XI, alpha 2 Gene [Source:MGI (curated);Acc:Col11a2-001]	E		TRUE
Tir1	Sudbery et al 2009	17	34196716	A/T	A	T			ENSMUST00000114250	ENSMUSG00000024330	Col11a2-001	SYNONYMOUS_CODING	0.968			collagen, type XI, alpha 2 Gene [Source:MGI (curated);Acc:Col11a2-001]	G		TRUE
Tir1	ss159820067	17	34197787	A/T	A	T			ENSMUSG00000024330	ENSMUST00000076926		SPLICE_SITE,SYNONYMOUS_CODING	0.918				G	1231	TRUE
Tir1	ss159820067	17	34197787	A/T	A	T			ENSMUSG00000024330	ENSMUST00000087497		SPLICE_SITE,SYNONYMOUS_CODING	0.918				G	1145	TRUE
Tir1	ss159820067	17	34197787	A/T	A	T			ENSMUSG00000024330	ENSMUST00000114250		SPLICE_SITE,SYNONYMOUS_CODING	0.918				G	1124	TRUE
Tir1	ss159820067	17	34197787	A/T	A	T			ENSMUSG00000024330	ENSMUST00000114252		SPLICE_SITE,SYNONYMOUS_CODING	0.918				G	1150	TRUE
Tir1	ss159820067	17	34197787	A/T	A	T			ENSMUSG00000024330	ENSMUST00000114255		SPLICE_SITE,SYNONYMOUS_CODING	0.918				G	1184	TRUE
Tir1	ss159820067	17	34197787	A/T	A	T			ENSMUSG00000024330	ENSMUST00000114257		SPLICE_SITE,SYNONYMOUS_CODING	0.918				G	1205	TRUE
Tir1	ss159820067	17	34197787	A/T	A	T			ENSMUSG00000024330	ENSMUST00000114258		SPLICE_SITE,SYNONYMOUS_CODING	0.918				G	1210	TRUE
Tir1	ss159826904	17	34197872	A/G	A		G		ENSMUSG00000024330	ENSMUST00000076926	Col11a2	NON_SYNONYMOUS_CODING	0.642	benign	?	Collagen alpha-2(XI) chain Precursor [Source:UniProtKB/Swiss-Prot;Acc:Q64739]	N/D	1260	TRUE
Tir1	ss159826904	17	34197872	A/G	A		G		ENSMUSG00000024330	ENSMUST00000087497	Col11a2	NON_SYNONYMOUS_CODING	0.642	benign	?	Collagen alpha-2(XI) chain Precursor [Source:UniProtKB/Swiss-Prot;Acc:Q64739]	N/D	1174	TRUE
Tir1	ss159826904	17	34197872	A/G	A		G		ENSMUSG00000024330	ENSMUST00000114250	Col11a2	NON_SYNONYMOUS_CODING	0.642	benign	?	Collagen alpha-2(XI) chain Precursor [Source:UniProtKB/Swiss-Prot;Acc:Q64739]	N/D	1153	TRUE
Tir1	ss159826904	17	34197872	A/G	A		G		ENSMUSG00000024330	ENSMUST00000114252	Col11a2	NON_SYNONYMOUS_CODING	0.642	benign	?	Collagen alpha-2(XI) chain Precursor [Source:UniProtKB/Swiss-Prot;Acc:Q64739]	N/D	1179	TRUE
Tir1	ss159826904	17	34197872	A/G	A		G		ENSMUSG00000024330	ENSMUST00000114255	Col11a2	NON_SYNONYMOUS_CODING	0.642	benign	?	Collagen alpha-2(XI) chain Precursor [Source:UniProtKB/Swiss-Prot;Acc:Q64739]	N/D	1213	TRUE
Tir1	ss159826904	17	34197872	A/G	A		G		ENSMUSG00000024330	ENSMUST00000114257	Col11a2	NON_SYNONYMOUS_CODING	0.642	benign	?	Collagen alpha-2(XI) chain Precursor [Source:UniProtKB/Swiss-Prot;Acc:Q64739]	N/D	1234	TRUE
Tir1	ss159826904	17	34197872	A/G	A		G		ENSMUSG00000024330	ENSMUST00000114258	Col11a2	NON_SYNONYMOUS_CODING	0.642	benign	?	Collagen alpha-2(XI) chain Precursor [Source:UniProtKB/Swiss-Prot;Acc:Q64739]	N/D	1239	TRUE
Tir1	ss159820089	17	34200404	T/C	T	C			ENSMUSG00000024330	ENSMUST00000076926		SPLICE_SITE,SYNONYMOUS_CODING	0.898				P	1464	TRUE
Tir1	ss159820089	17	34200404	T/C	T	C			ENSMUSG00000024330	ENSMUST00000087497		SPLICE_SITE,SYNONYMOUS_CODING	0.898				P	1378	TRUE
Tir1	ss159820089	17	34200404	T/C	T	C			ENSMUSG00000024330	ENSMUST00000114250		SPLICE_SITE,SYNONYMOUS_CODING	0.898				P	1357	TRUE
Tir1	ss159820089	17	34200404	T/C	T	C			ENSMUSG00000024330	ENSMUST00000114252		SPLICE_SITE,SYNONYMOUS_CODING	0.898				P	1383	TRUE
Tir1	ss159820089	17	34200404	T/C	T	C			ENSMUSG00000024330	ENSMUST00000114255		SPLICE_SITE,SYNONYMOUS_CODING	0.898				P	1417	TRUE
Tir1	ss159820089	17	34200404	T/C	T	C			ENSMUSG00000024330	ENSMUST00000114257		SPLICE_SITE,SYNONYMOUS_CODING	0.898				P	1438	TRUE
Tir1	ss159820089	17	34200404	T/C	T	C			ENSMUSG00000024330	ENSMUST00000114258		SPLICE_SITE,SYNONYMOUS_CODING	0.898				P	1443	TRUE
Tir1	ss159820092	17	34201052	A/G	A	G		G	ENSMUSG00000024330	ENSMUST00000076926	Col11a2	NON_SYNONYMOUS_CODING	0.998	benign	0.547	Collagen alpha-2(XI) chain Precursor [Source:UniProtKB/Swiss-Prot;Acc:Q64739]	I/M	1522	TRUE
Tir1	ss159820092	17	34201052	A/G	A	G		G	ENSMUSG00000024330	ENSMUST00000087497	Col11a2	NON_SYNONYMOUS_CODING	0.998	benign	0.547	Collagen alpha-2(XI) chain Precursor [Source:UniProtKB/Swiss-Prot;Acc:Q64739]	I/M	1436	TRUE
Tir1	ss159820092	17	34201052	A/G	A	G		G	ENSMUSG00000024330	ENSMUST00000114250	Col11a2	NON_SYNONYMOUS_CODING	0.998	benign	0.547	Collagen alpha-2(XI) chain Precursor [Source:UniProtKB/Swiss-Prot;Acc:Q64739]	I/M	1415	TRUE
Tir1	ss159820092	17	34201052	A/G	A	G		G	ENSMUSG00000024330	ENSMUST00000114252	Col11a2	NON_SYNONYMOUS_CODING	0.998	benign	0.547	Collagen alpha-2(XI) chain Precursor [Source:UniProtKB/Swiss-Prot;Acc:Q64739]	I/M	1441	TRUE
Tir1	ss159820092	17	34201052	A/G	A	G		G	ENSMUSG00000024330	ENSMUST00000114255	Col11a2	NON_SYNONYMOUS_CODING	0.998	benign	0.547	Collagen alpha-2(XI) chain Precursor [Source:UniProtKB/Swiss-Prot;Acc:Q64739]	I/M	1475	TRUE
Tir1	ss159820092	17	34201052	A/G	A	G		G	ENSMUSG00000024330	ENSMUST00000114257	Col11a2	NON_SYNONYMOUS_CODING	0.998	benign	0.547	Collagen alpha-2(XI) chain Precursor [Source:UniProtKB/Swiss-Prot;Acc:Q64739]	I/M	1496	TRUE
Tir1	ss159820092	17	34201052	A/G	A	G		G	ENSMUSG00000024330	ENSMUST00000114258	Col11a2	NON_SYNONYMOUS_CODING	0.998	benign	0.547	Collagen alpha-2(XI) chain Precursor [Source:UniProtKB/Swiss-Prot;Acc:Q64739]	I/M	1501	TRUE
Tir1	ss159820096	17	34201669	C/G	C	G		G	ENSMUSG00000024330	ENSMUST00000076926		SPLICE_SITE,INTRONIC	<0.1						TRUE
Tir1	Sudbery et al 2009	17	34202744	C/T	C	T		T	ENSMUST00000114250	ENSMUSG00000024330	Col11a2-001	SYNONYMOUS_CODING	1			collagen, type XI, alpha 2 Gene [Source:MGI (curated);Acc:Col11a2-001]	F		TRUE
	rs48661908	17	34229419	G/A	G	-	G	-	ENSMUSG00000024334	ENSMUST00000025192	H2-Oa	NON_SYNONYMOUS_CODING	0.199	benign	0.823	histocompatibility 2, O region alpha locus [Source:RefSeq peptide;Acc:NP_032232]	V/I	10	FALSE
	ss159820236	17	34229432	C/T	C	T	T	T	ENSMUSG00000024334	ENSMUST00000025192	H2-Oa	NON_SYNONYMOUS_CODING	<0.1	benign	0.111	histocompatibility 2, O region alpha locus [Source:RefSeq peptide;Acc:NP_032232]	A/V	14	TRUE
	Sudbery et al 2009	17	34230892	A/C	A	C			ENSMUST00000025192	ENSMUSG00000024334	MGI95924	NON_SYNONYMOUS_CODING	<0.1	probably damaging	2.196	histocompatibility 2, O region alpha locus Gene [Source:MGI Symbol;Acc:MGI:95924]	E/A		TRUE
	Sudbery et al 2009	17	34230896	C/T	C	T			ENSMUST00000025192	ENSMUSG00000024334	MGI95924	SYNONYMOUS_CODING	<0.1			histocompatibility 2, O region alpha locus Gene [Source:MGI Symbol;Acc:MGI:95924]	V		TRUE
	rs13474209	17	34249652	C/T	C	C	C	C	ENSMUSG00000024335	ENSMUST00000025193		SPLICE_SITE,SYNONYMOUS_CODING	0.86				A	755	FALSE
	rs13474209	17	34249652	C/T	C	C	C	C	ENSMUSG00000024335	ENSMUST00000095347		SPLICE_SITE,SYNONYMOUS_CODING	0.86				A	636	FALSE
	rs13474209	17	34249652	C/T	C	C	C	C	ENSMUSG00000024335	ENSMUST00000114241		SPLICE_SITE,SYNONYMOUS_CODING	0.86				A	755	FALSE
	rs13474209	17	34249652	C/T	C	C	C	C	ENSMUSG00000024335	ENSMUST00000114242		SPLICE_SITE,SYNONYMOUS_CODING	0.86				A	755	FALSE
	ss159820294	17	34250430	C/T	C	T	T		ENSMUSG00000024335	ENSMUST00000114241	0	SPLICE_SITE,INTRONIC	<0.1	0	0	0			TRUE
	rs13474200	17	34255558	G/A	G	G			ENSMUSG00000024335	ENSMUST00000025193	Brd2	NON_SYNONYMOUS_CODING	0.998	possibly damaging	-0.225	Bromodomain-containing protein 2 (Protein RING3)(Female sterile homeotic-related protein 1)(Fsrg-1) [Source:UniProtKB/Swiss-Prot;Acc:Q7JJ13]	P/S	7	FALSE
	rs13474200	17	34255558	G/A	G	G			ENSMUSG00000024335	ENSMUST00000114241	Brd2	NON_SYNONYMOUS_CODING	0.998	possibly damaging	-0.225	Bromodomain-containing protein 2 (Protein RING3)(Female sterile homeotic-related protein 1)(Fsrg-1) [Source:UniProtKB/Swiss-Prot;Acc:Q7JJ13]	P/S	7	FALSE
	rs13474200	17	34255558	G/A	G	G			ENSMUSG00000024335	ENSMUST00000114242	Brd2	NON_SYNONYMOUS_CODING	0.998	possibly damaging	-0.225	Bromodomain-containing protein 2 (Protein RING3)(Female sterile homeotic-related protein 1)(Fsrg-1) [Source:UniProtKB/Swiss-Prot;Acc:Q7JJ13]	P/S	7	FALSE
	ss159820341	17	34274075	C/G	C	G	G	G	ENSMUSG00000037649	ENSMUST00000042121	H2-DMa	NON_SYNONYMOUS_CODING	<0.1	benign	0.209	Class II histocompatibility antigen, M alpha chain Precursor [Source:UniProtKB/Swiss-Prot;Acc:P28078]	F/L	35	TRUE
	rs13468454	17	34274212	G/A	G	G	G	G	ENSMUSG00000037649	ENSMUST00000042121	H2-DMa	NON_SYNONYMOUS_CODING	1	benign	1.098	Class II histocompatibility antigen, M alpha chain Precursor [Source:UniProtKB/Swiss-Prot;Acc:P28078]	R/Q	81	FALSE
	Sudbery et al 2009	17	34284804	T/G	T	G			ENSMUST00000041982	ENSMUSG00000037548	MGI95923	NON_SYNONYMOUS_CODING	0.89	probably damaging	2.034	histocompatibility 2, class II, locus Mb2 Gene [Source:MGI Symbol;Acc:MGI:95923]	H/Q		TRUE
	rs47444840	17	34285498	G/C	G				ENSMUSG00000037548	ENSMUST00000041982	H2-DMb2	NON_SYNONYMOUS_CODING,SPLICE_SITE	<0.1	possibly damaging	1.969	histocompatibility 2, class II, locus Mb2 [Source:RefSeq peptide;Acc:NP_034518]	A/P	114	TRUE
	ENSMUSSNP4562543	17	34285525	A/G	A	G			ENSMUSG00000037548	ENSMUST00000041982	H2-DMb2	NON_SYNONYMOUS_CODING	0.36	benign	0.682	histocompatibility 2, class II, locus Mb2 [Source:RefSeq peptide;Acc:NP_034518]	T/A	123	TRUE
	rs47892467	17	34287749	C/T	C				ENSMUSG00000037548	ENSMUST00000041982	H2-DMb2	NON_SYNONYMOUS_CODING	<0.1	benign	1.252	histocompatibility 2, class II, locus Mb2 [Source:RefSeq peptide;Acc:NP_034518]	P/S	252	TRUE
	rs47519796	17	34288033	G/A	G	G			ENSMUSG00000037548	ENSMUST00000041982	H2-DMb2	NON_SYNONYMOUS_CODING	<0.1	benign	1.446	histocompatibility 2, class II, locus Mb2 [Source:RefSeq peptide;Acc:NP_034518]	R/Q	260	FALSE
	Sudbery et al 2009	17	34288037	C/T	C		T		ENSMUST00000041982	ENSMUSG00000037548	MGI95923	SYNONYMOUS_CODING	0.17			histocompatibility 2, class II, locus Mb2 Gene [Source:MGI Symbol;Acc:MGI:95923]	H		TRUE
	rs46675833	17	34290383	G/C	G		C	C	ENSMUSG00000079547	ENSMUST00000114232	H2-DMb1	NON_SYNONYMOUS_CODING	<0.1	probably damaging	2.025	Class II histocompatibility antigen, M beta 1 chain Precursor (H2-M beta 1 chain) [Source:UniProtKB/Swiss-Prot;Acc:P35737]	D/H	14	TRUE
	ss159827118	17	34292537	G/T	G		T		ENSMUSG00000079547	ENSMUST00000114232	H2-DMb1	NON_SYNONYMOUS_CODING	<0.1	possibly damaging	1.575	Class II histocompatibility antigen, M beta 1 chain Precursor (H2-M beta 1 chain) [Source:UniProtKB/Swiss-Prot;Acc:P35737]	W/L	72	TRUE
	ss159827120	17	34292606	T/C	T		C		ENSMUSG00000079547	ENSMUST00000114232	H2-DMb1	NON_SYNONYMOUS_CODING	<0.1	benign	1.466	Class II histocompatibility antigen, M beta 1 chain Precursor (H2-M beta 1 chain) [Source:UniProtKB/Swiss-Prot;Acc:P35737]	L/P	95	TRUE
	ENSMUSSNP6372623	17	34294193	G/C	G	C			ENSMUSG00000079547	ENSMUST00000114232	H2-DMb1	NON_SYNONYMOUS_CODING,SPLICE_SITE	<0.1	benign	1.116	Class II histocompatibility antigen, M beta 1 chain Precursor (H2-M beta 1 chain) [Source:UniProtKB/Swiss-Prot;Acc:P35737]	A/P	114	TRUE
	ENSMUSSNP4234957	17	34294220	A/G	A	G	A		ENSMUSG00000079547	ENSMUST00000114232	H2-DMb1	NON_SYNONYMOUS_CODING	0.991	benign	0.228	Class II histocompatibility antigen, M beta 1 chain Precursor (H2-M beta 1 chain) [Source:UniProtKB/Swiss-Prot;Acc:P35737]	T/A	123	FALSE
	ENSMUSSNP3961445	17	34296588	T/C	T	C			ENSMUSG00000079547	ENSMUST00000114232	H2-DMb1	NON_SYNONYMOUS_CODING	0.821	probably damaging	2.426	Class II histocompatibility antigen, M beta 1 chain Precursor (H2-M beta 1 chain) [Source:UniProtKB/Swiss-Prot;Acc:P35737]	S/P	252	TRUE
	rs33063134	17	34296614	C/G	A	C			ENSMUSG00000079547	ENSMUST00000114232	0	SPLICE_SITE,INTRONIC	<0.1	0	0	0			TRUE
	rs33306885	17	34296615	A/C	A	C	A		ENSMUSG00000079547	ENSMUST00000114232		SPLICE_SITE,INTRONIC	<0.1						FALSE
	Sudbery et al 2009	17	34296877	A/G	A		G		ENSMUST00000114232	ENSMUSG00000079547	MGI95922	NON_SYNONYMOUS_CODING	<0.1	benign	0.107	histocompatibility 2, class II, locus Mb1 Gene [Source:MGI Symbol;Acc:MGI:95922]	Q/R		TRUE
	ss159820404	17	34296877	A/G	A	G		G	ENSMUSG00000079547	ENSMUST00000114232	H2-DMb1	NON_SYNONYMOUS_CODING	<0.1	benign	0.107	Class II histocompatibility antigen, M beta 1 chain Precursor (H2-M beta 1 chain) [Source:UniProtKB/Swiss-Prot;Acc:P35737]	Q/R	260	TRUE
	ss159820498	17	34320037	C/T	C	T	T		ENSMUSG00000024337	ENSMUST00000076602	Psmb9	NON_SYNONYMOUS_CODING	0.997	benign	0.544	Proteasome subunit beta type-9 Precursor (EC 3.4.25.1)(Proteasome subunit beta-1i)(Proteasome chain 7)(Macropain chain 7)(Multicatalytic endopeptidase complex chain 7)(RING12 protein)(Low molecular mass protein 2)(LMP-2d) [Source:UniProtKB/Swiss-Prot;Acc:	D/N	177	TRUE
	Sudbery et al 2009	17	34320037	C/T	C			T	ENSMUST00000076602	ENSMUSG00000024337	MGI1346526	NON_SYNONYMOUS_CODING	0.997			proteasome (prosome, macropain) subunit, beta type 9 (large multifunctional peptidase 2) Gene [Source:MGI Symbol;Acc:MGI:1346526]	D/N		TRUE
	ss159820499	17	34320101	A/G	A	G			ENSMUSG00000024337	ENSMUST00000114230	Psmb9	NON_SYNONYMOUS_CODING	0.985	benign	?	Proteasome subunit beta type-9 Precursor (EC 3.4.25.1)(Proteasome subunit beta-1i)(Proteasome chain 7)(Macropain chain 7)(Multicatalytic endopeptidase complex chain 7)(RING12 protein)(Low molecular mass protein 2)(LMP-2d) [Source:UniProtKB/Swiss-Prot;Acc:	W/R	207	TRUE
	ss159820500	17	34320119	G/A	G	A	A	A	ENSMUSG00000024337	ENSMUST00000114230	Psmb9	NON_SYNONYMOUS_CODING	0.997	benign	?	Proteasome subunit beta type-9 Precursor (EC 3.4.25.1)(Proteasome subunit beta-1i)(Proteasome chain 7)(Macropain chain 7)(Multicatalytic endopeptidase complex chain 7)(RING12 protein)(Low molecular mass protein 2)(LMP-2d) [Source:UniProtKB/Swiss-Prot;Acc:	R/W	201	TRUE
	ss159820501	17	34320173	T/C	T	C	C	C	ENSMUSG00000024337	ENSMUST00000114230	Psmb9	NON_SYNONYMOUS_CODING	0.984	benign	?	Proteasome subunit beta type-9 Precursor (EC 3.4.25.1)(Proteasome subunit beta-1i)(Proteasome chain 7)(Macropain chain 7)(Multicatalytic endopeptidase complex chain 7)(RING12 protein)(Low molecular mass protein 2)(LMP-2d) [Source:UniProtKB/Swiss-Prot;Acc:	I/V	183	TRUE
	ss159820501	17	34320173	T/C	T	C	C	C	ENSMUSG00000024337	ENSMUST00000076602		SPLICE_SITE,SYNONYMOUS_CODING	0.984				V	131	TRUE
	ss159820503	17	34320574	A/G	A	G	G		ENSMUSG00000024337	ENSMUST00000076602	Psmb9	NON_SYNONYMOUS_CODING	0.989	probably damaging	2.197	Proteasome subunit beta type-9 Precursor (EC 3.4.25.1)(Proteasome subunit beta-1i)(Proteasome chain 7)(Macropain chain 7)(Multicatalytic endopeptidase complex chain 7)(RING12 protein)(Low molecular mass protein 2)(LMP-2d) [Source:UniProtKB/Swiss-Prot;Acc:	C/R	126	TRUE
	ss159820503	17	34320574	A/G	A	G	G		ENSMUSG00000024337	ENSMUST00000114230	Psmb9	NON_SYNONYMOUS_CODING	0.989	probably damaging	2.063	Proteasome subunit beta type-9 Precursor (EC 3.4.25.1)(Proteasome subunit beta-1i)(Proteasome chain 7)(Macropain chain 7)(Multicatalytic endopeptidase complex chain 7)(RING12 protein)(Low molecular mass protein 2)(LMP-2d) [Source:UniProtKB/Swiss-Prot;Acc:	C/R	177	TRUE
	Sudbery et al 2009	17	34320574	A/G	A			G	ENSMUST00000076602	ENSMUSG00000024337	MGI1346526	NON_SYNONYMOUS_CODING	0.989			proteasome (prosome, macropain) subunit, beta type 9 (large multifunctional peptidase 2) Gene [Source:MGI Symbol;Acc:MGI:1346526]	C/R		TRUE
	ss159820506	17	34321308	T/C	T	C			ENSMUSG00000024337	ENSMUST00000114230	Psmb9	NON_SYNONYMOUS_CODING	<0.1	benign	0.522	Proteasome subunit beta type-9 Precursor (EC 3.4.25.1)(Proteasome subunit beta-1i)(Proteasome chain 7)(Macropain chain 7)(Multicatalytic endopeptidase complex chain 7)(RING12 protein)(Low molecular mass protein 2)(LMP-2d) [Source:UniProtKB/Swiss-Prot;Acc:	H/R	111	TRUE
	ss159820506	17	34321308	T/C	T	C			ENSMUSG00000024337	ENSMUST00000076602	Psmb9	NON_SYNONYMOUS_CODING	<0.1	benign	0.235	Proteasome subunit beta type-9 Precursor (EC 3.4.25.1)(Proteasome subunit beta-1i)(Proteasome chain 7)(Macropain chain 7)(Multicatalytic endopeptidase complex chain 7)(RING12 protein)(Low molecular mass protein 2)(LMP-2d) [Source:UniProtKB/Swiss-Prot;Acc:	H/R	60	TRUE
	ss159820508	17	34322677	C/T	C	T	T	T	ENSMUSG00000024337	ENSMUST00000076602		SPLICE_SITE,SYNONYMOUS_CODING	1				A	42	TRUE
	ss159820508	17	34322677	C/T	C	T	T	T	ENSMUSG00000024337	ENSMUST00000114230		SPLICE_SITE,SYNONYMOUS_CODING	1				A	93	TRUE
	ss159820509	17	34322877	A/G	A	G	G	G	ENSMUSG00000024337	ENSMUST00000114230	Psmb9	NON_SYNONYMOUS_CODING	<0.1	benign	?	Proteasome subunit beta type-9 Precursor (EC 3.4.25.1)(Proteasome subunit beta-1i)(Proteasome chain 7)(Macropain chain 7)(Multicatalytic endopeptidase complex chain 7)(RING12 protein)(Low molecular mass protein 2)(LMP-2d) [Source:UniProtKB/Swiss-Prot;Acc:	C/R	27	TRUE
	ss159820521	17	34327565	G/A	G	A	A	A	ENSMUSG00000037321	ENSMUST00000041633	Tap1	NON_SYNONYMOUS_CODING	<0.1	benign	0.066	Antigen peptide transporter 1 (APT1)(Peptide transporter TAP1)(ATP-binding cassette sub-family B member 2)(Histocompatibility antigen modifier 1) [Source:UniProtKB/Swiss-Prot;Acc:P21958]	G/D	277	TRUE
	ss159829358	17	34329845	G/A	G			A	ENSMUSG00000037321	ENSMUST00000041633	Tap1	NON_SYNONYMOUS_CODING	0.363	benign	0.359	Antigen peptide transporter 1 (APT1)(Peptide transporter TAP1)(ATP-binding cassette sub-family B member 2)(Histocompatibility antigen modifier 1) [Source:UniProtKB/Swiss-Prot;Acc:P21958]	A/T	414	TRUE
	ss159820535	17	34330565	T/C	T	C	C		ENSMUSG00000037321	ENSMUST00000041633	Tap1	NON_SYNONYMOUS_CODING	0.117	possibly damaging	1.796	Antigen peptide transporter 1 (APT1)(Peptide transporter TAP1)(ATP-binding cassette sub-family B member 2)(Histocompatibility antigen modifier 1) [Source:UniProtKB/Swiss-Prot;Acc:P21958]	C/R	544	TRUE
	ss159820557	17	34338194	G/C	G	C		C	ENSMUSG00000024338	ENSMUST00000025196	Psmb8	NON_SYNONYMOUS_CODING	0.872	benign	0.792	Proteasome subunit beta type-8 Precursor (EC 3.4.25.1)(Proteasome subunit beta-5i)(Proteasome component C13)(Macropain subunit C13)(Multicatalytic endopeptidase complex subunit C13) [Source:UniProtKB/Swiss-Prot;Acc:P28063]	G/R	272	TRUE
	Sudbery et al 2009	17	34342408	G/A	G		A		ENSMUST00000025197	ENSMUSG00000024339	Tap2-001	NON_SYNONYMOUS_CODING	0.818			transporter 2, ATP-binding cassette, sub-family B (MDR/TAP) Gene [Source:MGI (curated);Acc:Tap2-001]	0		TRUE
	ss159829364	17	34342409	A/G	A			G	ENSMUSG00000024339	ENSMUST00000025197	Tap2	NON_SYNONYMOUS_CODING	0.813	benign	?	Antigen peptide transporter 2 (APT2)(ATP-binding cassette sub-family B member 3)(Histocompatibility antigen modifier 2) [Source:UniProtKB/Swiss-Prot;Acc:P36371]	E/G	57	TRUE
	Sudbery et al 2009	17	34342409	A/G	A		G		ENSMUST00000025197	ENSMUSG00000024339	Tap2-001	NON_SYNONYMOUS_CODING	0.813			transporter 2, ATP-binding cassette, sub-family B (MDR/TAP) Gene [Source:MGI (curated);Acc:Tap2-001]	0		TRUE
	ss159820570	17	34342498	G/A	G	A		A	ENSMUSG00000024339	ENSMUST00000025197	Tap2	NON_SYNONYMOUS_CODING	<0.1	benign	0	Antigen peptide transporter 2 (APT2)(ATP-binding cassette sub-family B member 3)(Histocompatibility antigen modifier 2) [Source:UniProtKB/Swiss-Prot;Acc:P36371]	A/T	87	TRUE
	Sudbery et al 2009	17	34342565	T/C	T		C		ENSMUST00000025197	ENSMUSG00000024339	Tap2-001	NON_SYNONYMOUS_CODING	<0.1			transporter 2, ATP-binding cassette, sub-family B (MDR/TAP) Gene [Source:MGI (curated);Acc:Tap2-001]	0		TRUE
	Sudbery et al 2009	17	34342566	T/C	T		C		ENSMUST00000025197	ENSMUSG00000024339	Tap2-001	SYNONYMOUS_CODING	<0.1			transporter 2, ATP-binding cassette, sub-family B (MDR/TAP) Gene [Source:MGI (curated);Acc:Tap2-001]	0		TRUE
	rs8258598	17	34342645	C/A	C	C	C	C	ENSMUSG00000024339	ENSMUST00000025197	Tap2	NON_SYNONYMOUS_CODING	0.253	benign	-0.646	Antigen peptide transporter 2 (APT2)(ATP-binding cassette sub-family B member 3)(Histocompatibility antigen modifier 2) [Source:UniProtKB/Swiss-Prot;Acc:P36371]	L/M	136	FALSE
	ss159820606	17	34348930	A/G	A	G	G		ENSMUSG00000024339	ENSMUST00000025197	Tap2	NON_SYNONYMOUS_CODING	0.902	benign	0.462	Antigen peptide transporter 2 (APT2)(ATP-binding cassette sub-family B member 3)(Histocompatibility antigen modifier 2) [Source:UniProtKB/Swiss-Prot;Acc:P36371]	H/R	353	TRUE
	ss159820624	17	34351036	A/G	A	G	G	G	ENSMUSG00000081512	ENSMUST00000121995	RP23-123G8.2	NON_SYNONYMOUS_CODING	0.531	benign	?	Novel protein [Source:UniProtKB/TrEMBL;Acc:A6X8J8]	F/L	85	TRUE
	ss159820624	17	34351036	A/G	A	G	G	G	ENSMUSG00000024339	ENSMUST00000025197	Tap2	NON_SYNONYMOUS_CODING	0.531	benign	0.451	Antigen peptide transporter 2 (APT2)(ATP-binding cassette sub-family B member 3)(Histocompatibility antigen modifier 2) [Source:UniProtKB/Swiss-Prot;Acc:P36371]	K/R	449	TRUE
	Sudbery et al 2009	17	34352987	G/A	G	A			ENSMUST00000025197	ENSMUSG00000024339	Tap2-001	SYNONYMOUS_CODING	<0.1			transporter 2, ATP-binding cassette, sub-family B (MDR/TAP) Gene [Source:MGI (curated);Acc:Tap2-001]	R		TRUE
	Sudbery et al 2009	17	34375930	G/T	G		T		ENSMUST00000095342	ENSMUSG00000041538	MGI95925	NON_SYNONYMOUS_CODING	<0.1	benign	0.802	histocompatibility 2, O region beta locus Gene [Source:MGI Symbol;Acc:MGI:95925]	R/M		TRUE
	Sudbery et al 2009	17	34375932	G/T	G		T		ENSMUST00000095342	ENSMUSG00000041538	MGI95925	NON_SYNONYMOUS_CODING	<0.1	benign	0.12	histocompatibility 2, O region beta locus Gene [Source:MGI Symbol;Acc:MGI:95925]	A/S		TRUE
	ss159820678	17	34378077	G/A	G	A		A	ENSMUSG00000041538	ENSMUST00000069091	H2-Ob	NON_SYNONYMOUS_CODING	0.589	benign	0.785	histocompatibility 2, O region beta locus [Source:RefSeq peptide;Acc:NP_034519]	M/I	72	TRUE
	Sudbery et al 2009	17	34379419	G/A	G		A		ENSMUST00000095342	ENSMUSG00000041538	MGI95925	SYNONYMOUS_CODING	<0.1			histocompatibility 2, O region beta locus Gene [Source:MGI Symbol;Acc:MGI:95925]	P		TRUE
	Sudbery et al 2009	17	34379467	C/T	C	T			ENSMUST00000095342	ENSMUSG00000041538	MGI95925	SYNONYMOUS_CODING	0.969			histocompatibility 2, O region beta locus Gene [Source:MGI Symbol;Acc:MGI:95925]	Y		TRUE
	Sudbery et al 2009	17	34380461	T/C	T		C		ENSMUST00000095342	ENSMUSG00000041538	MGI95925	NON_SYNONYMOUS_CODING	0.516	benign	0.315	histocompatibility 2, O region beta locus Gene [Source:MGI Symbol;Acc:MGI:95925]	V/A		TRUE
	rs51014158	17	34380461	T/C	T				ENSMUSG00000041538	ENSMUST00000069091	H2-Ob	NON_SYNONYMOUS_CODING	0.516	benign	0.315	histocompatibility 2, O region beta locus [Source:RefSeq peptide;Acc:NP_034519]	V/A	231	TRUE
	Sudbery et al 2009	17	34380486	C/T	C		T		ENSMUST00000095342	ENSMUSG00000041538	MGI95925	SYNONYMOUS_CODING	0.226			histocompatibility 2, O region beta locus Gene [Source:MGI Symbol;Acc:MGI:95925]	F		TRUE
	Sudbery et al 2009	17	34380495	G/C	G		C		ENSMUST00000095342	ENSMUSG00000041538	MGI95925	SYNONYMOUS_CODING	<0.1			histocompatibility 2, O region beta locus Gene [Source:MGI Symbol;Acc:MGI:95925]	G		TRUE
	rs48597033	17	34380527	A/G	A	-			ENSMUSG00000041538	ENSMUST00000069091		SPLICE_SITE,INTRONIC	0.156						TRUE
	rs33422582	17	34381046	A/C	A	A	A	A	ENSMUSG00000041538	ENSMUST00000095342	0	NON_SYNONYMOUS_CODING	<0.1	0	0	0	S/R	266	FALSE
	rs29521642	17	34381047	G/T	G	G	G	G	ENSMUSG00000041538	ENSMUST00000095342	H2-Ob	NON_SYNONYMOUS_CODING	<0.1	benign	-0.127	histocompatibility 2, O region beta locus [Source:RefSeq peptide;Acc:NP_034519]	S/I	266	FALSE
	Sudbery et al 2009	17	34390833	C/T	C	T		T	ENSMUST00000069091	ENSMUSG00000041538	MGI95925	NON_SYNONYMOUS_CODING	<0.1	possibly damaging	1.8	histocompatibility 2, O region beta locus Gene [Source:MGI Symbol;Acc:MGI:95925]	P/S		TRUE
	ENSMUSSNP402463	17	34390833	C/T	C	C	C	C	ENSMUSG00000041538	ENSMUST00000069091	H2-Ob	NON_SYNONYMOUS_CODING	<0.1	possibly damaging	-0.225	histocompatibility 2, O region beta locus [Source:RefSeq peptide;Acc:NP_034519]	P/S	277	FALSE
	Sudbery et al 2009	17	34390835	G/A	G	A		A	ENSMUST00000069091	ENSMUSG00000041538	MGI95925	SYNONYMOUS_CODING	<0.1			histocompatibility 2, O region beta locus Gene [Source:MGI Symbol;Acc:MGI:95925]	P		TRUE
	Sudbery et al 2009	17	34401742	T/A	T		A		ENSMUST00000114196	ENSMUSG00000073421	MGI1890697	NON_SYNONYMOUS_CODING	0.957	benign	0.404	response to metastatic cancers 2 Gene [Source:MGI Symbol;Acc:MGI:1890697]	F/Y		TRUE
	Sudbery et al 2009	17	34401957	C/A	C		A		ENSMUST00000114196	ENSMUSG00000073421	MGI1890697	NON_SYNONYMOUS_CODING	<0.1	benign	0.96	response to metastatic cancers 2 Gene [Source:MGI Symbol;Acc:MGI:1890697]	H/N		TRUE
	Sudbery et al 2009	17	34401958	A/C	A	C	C	C	ENSMUST00000114196	ENSMUSG00000073421	MGI1890697	NON_SYNONYMOUS_CODING	<0.1	benign	0.29	response to metastatic cancers 2 Gene [Source:MGI Symbol;Acc:MGI:1890697]	H/P		TRUE
	ss159820877	17	34404290	A/G	A	G		G	ENSMUSG00000073421	ENSMUST00000040828	Rmcs2	NON_SYNONYMOUS_CODING	<0.1	benign	0.204	H-2 class II histocompatibility antigen, A beta chain Precursor [Source:UniProtKB/Swiss-Prot;Acc:P14483]	N/S	126	TRUE
	Sudbery et al 2009	17	34404348	C/T	C		T		ENSMUST00000114196	ENSMUSG00000073421	MGI1890697	SYNONYMOUS_CODING	0.998			response to metastatic cancers 2 Gene [Source:MGI Symbol;Acc:MGI:1890697]	C		TRUE
	Sudbery et al 2009	17	34404351	A/G	A		G		ENSMUST00000114196	ENSMUSG00000073421	MGI1890697	SYNONYMOUS_CODING	0.964			response to metastatic cancers 2 Gene [Source:MGI Symbol;Acc:MGI:1890697]	S		TRUE
	Sudbery et al 2009	17	34404516	T/C	T	C		C	ENSMUST00000114196	ENSMUSG00000073421	MGI1890697	SYNONYMOUS_CODING	0.831			response to metastatic cancers 2 Gene [Source:MGI Symbol;Acc:MGI:1890697]	C		TRUE
	Sudbery et al 2009	17	34404519	C/T	C	T		T	ENSMUST00000114196	ENSMUSG00000073421	MGI1890697	SYNONYMOUS_CODING	0.131			response to metastatic cancers 2 Gene [Source:MGI Symbol;Acc:MGI:1890697]	H		TRUE
	ss159829412	17	34404562	A/C	A			C	ENSMUSG00000073421	ENSMUST00000040828		SPLICE_SITE,SYNONYMOUS_CODING	0.999				R	217	TRUE
	ss159820880	17	34404680	A/T	A	T		T	ENSMUSG00000073421	ENSMUST00000114196	H2Ab1	ESSENTIAL_SPLICE_SITE,INTRONIC	<0.1	0	0	0			TRUE
	ss159820887	17	34404888	T/C	T	C	C	C	ENSMUSG00000073421	ENSMUST00000114196	Rmcs2	NON_SYNONYMOUS_CODING	0.987	benign	0.134	H-2 class II histocompatibility antigen, A beta chain Precursor [Source:UniProtKB/Swiss-Prot;Acc:P14483]	L/P	205	TRUE
	ss159820887	17	34404888	T/C	T	C	C	C	ENSMUSG00000073421	ENSMUST00000040828	Rmcs2	NON_SYNONYMOUS_CODING	0.987	benign	0.029	H-2 class II histocompatibility antigen, A beta chain Precursor [Source:UniProtKB/Swiss-Prot;Acc:P14483]	W/R	224	TRUE
	ss159820888	17	34404914	G/T	G	T			ENSMUSG00000073421	ENSMUST00000114196	Rmcs2	NON_SYNONYMOUS_CODING	<0.1	benign	1.315	H-2 class II histocompatibility antigen, A beta chain Precursor [Source:UniProtKB/Swiss-Prot;Acc:P14483]	G/W	214	TRUE
	rs49222965	17	34405398	C/T	C	T		T	ENSMUSG00000073421	ENSMUST00000040828		SPLICE_SITE,INTRONIC	<0.1						TRUE
	ss159820906	17	34406095	A/G	A	G	G	G	ENSMUSG00000073421	ENSMUST00000114196	Rmcs2	NON_SYNONYMOUS_CODING	<0.1	benign	?	H-2 class II histocompatibility antigen, A beta chain Precursor [Source:UniProtKB/Swiss-Prot;Acc:P14483]	T/A	262	TRUE
	ss159820907	17	34406100	A/C	A	C	C	C	ENSMUSG00000073421	ENSMUST00000114196		STOP_LOST	<0.1				*/C	263	TRUE
	ss159827507	17	34420094	T/C	T		C	C	ENSMUSG00000036594	ENSMUST00000040655	0	SPLICE_SITE,INTRONIC	<0.1	0	0	0			TRUE
	ss159827509	17	34420277	G/A	G		A	A	ENSMUSG00000036594	ENSMUST00000040655	0	SPLICE_SITE,INTRONIC	0.839	0	0	0			TRUE
	rs13459973	17	34420523	A/G	A	A	A	A	ENSMUSG00000036594	ENSMUST00000040655	H2-Ea	NON_SYNONYMOUS_CODING	1	probably damaging	0.38	H-2 class II histocompatibility antigen, A-B alpha chain Precursor (IAalpha) [Source:UniProtKB/Swiss-Prot;Acc:P14434]	W/R	205	FALSE
	ss159820979	17	34420670	C/T	C	T	T	T	ENSMUSG00000036594	ENSMUST00000040655	H2-Ea	NON_SYNONYMOUS_CODING	0.591	benign	1.264	H-2 class II histocompatibility antigen, A-B alpha chain Precursor (IAalpha) [Source:UniProtKB/Swiss-Prot;Acc:P14434]	A/T	156	TRUE
	Sudbery et al 2009	17	34421272	C/T	C	T		T	ENSMUST00000040655	ENSMUSG00000036594	MGI95895	NON_SYNONYMOUS_CODING	<0.1	benign	0.369	histocompatibility 2, class II antigen A, alpha Gene [Source:MGI Symbol;Acc:MGI:95895]	V/I		TRUE
	Sudbery et al 2009	17	34421274	C/T	C	T		T	ENSMUST00000040655	ENSMUSG00000036594	MGI95895	NON_SYNONYMOUS_CODING	<0.1	benign	0.865	histocompatibility 2, class II antigen A, alpha Gene [Source:MGI Symbol;Acc:MGI:95895]	G/E		TRUE
	rs50931089	17	34421277	A/G	A	A	A	A	ENSMUSG00000036594	ENSMUST00000040655	H2-Ea	NON_SYNONYMOUS_CODING	<0.1	probably damaging	-0.863	H-2 class II histocompatibility antigen, A-B alpha chain Precursor (IAalpha) [Source:UniProtKB/Swiss-Prot;Acc:P14434]	L/S	97	FALSE
	Sudbery et al 2009	17	34421289	A/T	A		T		ENSMUST00000040655	ENSMUSG00000036594	MGI95895	NON_SYNONYMOUS_CODING	<0.1	benign	0.198	histocompatibility 2, class II antigen A, alpha Gene [Source:MGI Symbol;Acc:MGI:95895]	V/E		TRUE
	ss159820994	17	34421321	G/C	G	C	C		ENSMUSG00000036594	ENSMUST00000040655	H2-Ea	NON_SYNONYMOUS_CODING	0.988	benign	0.277	H-2 class II histocompatibility antigen, A-B alpha chain Precursor (IAalpha) [Source:UniProtKB/Swiss-Prot;Acc:P14434]	D/E	82	TRUE
	rs46822628	17	34421332	C/T	C	C	C	C	ENSMUSG00000036594	ENSMUST00000040655	H2-Ea	NON_SYNONYMOUS_CODING	<0.1	benign	0.695	H-2 class II histocompatibility antigen, A-B alpha chain Precursor (IAalpha) [Source:UniProtKB/Swiss-Prot;Acc:P14434]	A/T	79	FALSE
	Sudbery et al 2009	17	34421366	C/T	C		T		ENSMUST00000040655	ENSMUSG00000036594	MGI95895	SYNONYMOUS_CODING	0.985			histocompatibility 2, class II antigen A, alpha Gene [Source:MGI Symbol;Acc:MGI:95895]	E		TRUE
	Sudbery et al 2009	17	34421368	C/T	C		T		ENSMUST00000040655	ENSMUSG00000036594	MGI95895	NON_SYNONYMOUS_CODING	0.978	benign	1.047	histocompatibility 2, class II antigen A, alpha Gene [Source:MGI Symbol;Acc:MGI:95895]	E/K		TRUE
	Sudbery et al 2009	17	34421415	A/T	A		T		ENSMUST00000040655	ENSMUSG00000036594	MGI95895	NON_SYNONYMOUS_CODING	0.663	benign	0.559	histocompatibility 2, class II antigen A, alpha Gene [Source:MGI Symbol;Acc:MGI:95895]	F/Y		TRUE
	Sudbery et al 2009	17	34421416	A/G	A		G		ENSMUST00000040655	ENSMUSG00000036594	MGI95895	NON_SYNONYMOUS_CODING	0.643	probably damaging	2.26	histocompatibility 2, class II antigen A, alpha Gene [Source:MGI Symbol;Acc:MGI:95895]	F/L		TRUE
	ss159820996	17	34421454	C/G	C	G			ENSMUSG00000036594	ENSMUST00000040655	H2-Ea	NON_SYNONYMOUS_CODING	<0.1	benign	0.146	H-2 class II histocompatibility antigen, A-B alpha chain Precursor (IAalpha) [Source:UniProtKB/Swiss-Prot;Acc:P14434]	S/T	38	TRUE
	Sudbery et al 2009	17	34421467	T/A	T			A	ENSMUST00000040655	ENSMUSG00000036594	MGI95895	NON_SYNONYMOUS_CODING	<0.1	benign	0.197	histocompatibility 2, class II antigen A, alpha Gene [Source:MGI Symbol;Acc:MGI:95895]	T/S		TRUE
	ss159821050	17	34424649	A/G	A	G	G	G	ENSMUSG00000036594	ENSMUST00000040655	H2-Aa	REGULATORY_REGION	0.491	0	0	0			TRUE
	ss159821208	17	34442902	G/A	G	A		A	ENSMUSG00000060586	ENSMUST00000076311	H2-Eb1	NON_SYNONYMOUS_CODING	0.226	benign	0.426	H-2 class II histocompatibility antigen, E-B beta chain Precursor [Source:UniProtKB/Swiss-Prot;Acc:P04230]	V/M	2	TRUE
	ss159827697	17	34446426	A/T	A		T		ENSMUSG00000060586	ENSMUST00000074557		SPLICE_SITE,SYNONYMOUS_CODING	<0.1				G	1	TRUE
	ss159821227	17	34446605	A/T	A	T			ENSMUSG00000060586	ENSMUST00000074557	H2-Eb1	NON_SYNONYMOUS_CODING	<0.1	benign	0.276	H-2 class II histocompatibility antigen, E-B beta chain Precursor [Source:UniProtKB/Swiss-Prot;Acc:P04230]	E/V	28	TRUE
	ss159821227	17	34446605	A/T	A	T			ENSMUSG00000060586	ENSMUST00000076311	H2-Eb1	NON_SYNONYMOUS_CODING	<0.1	benign	0.276	H-2 class II histocompatibility antigen, E-B beta chain Precursor [Source:UniProtKB/Swiss-Prot;Acc:P04230]	E/V	55	TRUE
	rs13473018	17	34446710	G/T	G	G	G	G	ENSMUSG00000060586	ENSMUST00000076311	H2-Eb1	NON_SYNONYMOUS_CODING	<0.1	probably damaging	-1.191	H-2 class II histocompatibility antigen, E-B beta chain Precursor [Source:UniProtKB/Swiss-Prot;Acc:P04230]	S/I	90	FALSE
	rs13473018	17	34446710	G/T	G	G	G	G	ENSMUSG00000060586	ENSMUST00000074557	H2-Eb1	NON_SYNONYMOUS_CODING	<0.1	probably damaging	-1.201	H-2 class II histocompatibility antigen, E-B beta chain Precursor [Source:UniProtKB/Swiss-Prot;Acc:P04230]	S/I	63	FALSE
	ss159827705	17	34446721	T/A	T		A		ENSMUSG00000060586	ENSMUST00000076311	H2-Eb1	NON_SYNONYMOUS_CODING	<0.1	benign	0.044	H-2 class II histocompatibility antigen, E-B beta chain Precursor [Source:UniProtKB/Swiss-Prot;Acc:P04230]	F/I	94	TRUE
	ss159827705	17	34446721	T/A	T		A		ENSMUSG00000060586	ENSMUST00000074557	H2-Eb1	NON_SYNONYMOUS_CODING	<0.1	benign	0.042	H-2 class II histocompatibility antigen, E-B beta chain Precursor [Source:UniProtKB/Swiss-Prot;Acc:P04230]	F/I	67	TRUE
	rs50132005	17	34446779	C/T	C	C	C	C	ENSMUSG00000060586	ENSMUST00000076311	H2-Eb1	NON_SYNONYMOUS_CODING	<0.1	benign	-0.101	H-2 class II histocompatibility antigen, E-B beta chain Precursor [Source:UniProtKB/Swiss-Prot;Acc:P04230]	S/L	113	FALSE
	rs50132005	17	34446779	C/T	C	C	C	C	ENSMUSG00000060586	ENSMUST00000074557	H2-Eb1	NON_SYNONYMOUS_CODING	<0.1	benign	-0.03	H-2 class II histocompatibility antigen, E-B beta chain Precursor [Source:UniProtKB/Swiss-Prot;Acc:P04230]	S/L	86	FALSE
	ss159821228	17	34446786	A/C	A	C			ENSMUSG00000060586	ENSMUST00000074557	H2-Eb1	NON_SYNONYMOUS_CODING	<0.1	benign	0.119	H-2 class II histocompatibility antigen, E-B beta chain Precursor [Source:UniProtKB/Swiss-Prot;Acc:P04230]	K/N	88	TRUE
	ss159821228	17	34446786	A/C	A	C			ENSMUSG00000060586	ENSMUST00000076311	H2-Eb1	NON_SYNONYMOUS_CODING	<0.1	benign	0.118	H-2 class II histocompatibility antigen, E-B beta chain Precursor [Source:UniProtKB/Swiss-Prot;Acc:P04230]	K/N	115	TRUE
	ss159821229	17	34446797	G/C	G	C		C	ENSMUSG00000060586	ENSMUST00000076311	H2-Eb1	NON_SYNONYMOUS_CODING	0.213	benign	0.042	H-2 class II histocompatibility antigen, E-B beta chain Precursor [Source:UniProtKB/Swiss-Prot;Acc:P04230]	R/P	119	TRUE
	ss159821229	17	34446797	G/C	G	C		C	ENSMUSG00000060586	ENSMUST00000074557	H2-Eb1	NON_SYNONYMOUS_CODING	0.213	benign	0.038	H-2 class II histocompatibility antigen, E-B beta chain Precursor [Source:UniProtKB/Swiss-Prot;Acc:P04230]	R/P	92	TRUE
	rs50410264	17	34451190	G/T	G	G	G	G	ENSMUSG00000060586	ENSMUST00000076311	H2-Eb1	NON_SYNONYMOUS_CODING	0.965	benign	0.021	H-2 class II histocompatibility antigen, E-B beta chain Precursor [Source:UniProtKB/Swiss-Prot;Acc:P04230]	S/I	147	FALSE
	rs50410264	17	34451190	G/T	G	G	G	G	ENSMUSG00000060586	ENSMUST00000074557	H2-Eb1	NON_SYNONYMOUS_CODING	0.965	benign	0.009	H-2 class II histocompatibility antigen, E-B beta chain Precursor [Source:UniProtKB/Swiss-Prot;Acc:P04230]	S/I	120	FALSE
	Sudbery et al 2009	17	34452091	C/T	C			T	ENSMUST00000076311	ENSMUSG00000060586	MGI95901	SYNONYMOUS_CODING	<0.1			histocompatibility 2, class II antigen E beta Gene [Source:MGI Symbol;Acc:MGI:95901]	N		TRUE
	ss159821258	17	34462700	C/G	C	G	G	G	ENSMUSG00000067341	ENSMUST00000050325	H2-Eb2	NON_SYNONYMOUS_CODING	<0.1	benign	1.188	histocompatibility 2, class II antigen E beta2 [Source:RefSeq peptide;Acc:NP_001029150]	L/V	22	TRUE
	ss159827816	17	34471178	C/T	C		T		ENSMUSG00000067341	ENSMUST00000050325	H2-Eb2	NON_SYNONYMOUS_CODING	<0.1	benign	1.388	histocompatibility 2, class II antigen E beta2 [Source:RefSeq peptide;Acc:NP_001029150]	P/L	131	TRUE
	Sudbery et al 2009	17	34471321	A/G	A	G			ENSMUST00000050325	ENSMUSG00000067341	MGI95902	NON_SYNONYMOUS_CODING	0.904	benign	1.459	histocompatibility 2, class II antigen E beta2 Gene [Source:MGI Symbol;Acc:MGI:95902]	R/G		TRUE
	ss159827817	17	34471321	A/G	A		G		ENSMUSG00000067341	ENSMUST00000050325	H2-Eb2	NON_SYNONYMOUS_CODING	0.904	benign	1.459	histocompatibility 2, class II antigen E beta2 [Source:RefSeq peptide;Acc:NP_001029150]	R/G	179	TRUE
	Sudbery et al 2009	17	34471358	T/C	T			C	ENSMUST00000050325	ENSMUSG00000067341	MGI95902	NON_SYNONYMOUS_CODING	0.993	benign	0.641	histocompatibility 2, class II antigen E beta2 Gene [Source:MGI Symbol;Acc:MGI:95902]	M/T		TRUE
	ss159821286	17	34471358	T/C	T	C	C		ENSMUSG00000067341	ENSMUST00000050325	H2-Eb2	NON_SYNONYMOUS_CODING	0.993	benign	0.641	histocompatibility 2, class II antigen E beta2 [Source:RefSeq peptide;Acc:NP_001029150]	M/T	191	TRUE
	Sudbery et al 2009	17	34475790	A/G	A			G	ENSMUST00000050325	ENSMUSG00000067341	MGI95902	SYNONYMOUS_CODING	0.119			histocompatibility 2, class II antigen E beta2 Gene [Source:MGI Symbol;Acc:MGI:95902]	E		TRUE
	rs49265145	17	34475823	T/A	T	A			ENSMUSG00000067341	ENSMUST00000050325	H2-Eb2	NON_SYNONYMOUS_CODING	<0.1	benign	1.125	histocompatibility 2, class II antigen E beta2 [Source:RefSeq peptide;Acc:NP_001029150]	S/R	277	TRUE
	ss159827868	17	34479991	C/T	C		T		ENSMUSG00000036322	ENSMUST00000040306	H2-Ea	NON_SYNONYMOUS_CODING	0.955	possibly damaging	1.518	H-2 class II histocompatibility antigen, E-U alpha chain Fragment [Source:UniProtKB/Swiss-Prot;Acc:P14439]	V/M	192	TRUE
	ss159827869	17	34480659	A/T	A		T	T	ENSMUSG00000036322	ENSMUST00000040306	H2-Ea	NON_SYNONYMOUS_CODING	0.995	probably damaging	2.182	H-2 class II histocompatibility antigen, E-U alpha chain Fragment [Source:UniProtKB/Swiss-Prot;Acc:P14439]	F/Y	148	TRUE
	Sudbery et al 2009	17	34480659	A/T	A	T			ENSMUST00000040306	ENSMUSG00000036322	P14439	NON_SYNONYMOUS_CODING	0.995			H-2 class II histocompatibility antigen, E-U alpha chain Fragment [Source:UniProtKB/Swiss-Prot;Acc:P14439]	0		TRUE
	Sudbery et al 2009	17	34480760	G/C	G	C			ENSMUST00000040306	ENSMUSG00000036322	P14439	SYNONYMOUS_CODING	0.379			H-2 class II histocompatibility antigen, E-U alpha chain Fragment [Source:UniProtKB/Swiss-Prot;Acc:P14439]	0		TRUE
	ss159821391	17	34495029	A/C	A	C	C	C	ENSMUSG00000024340	ENSMUST00000025198	Btnl2	NON_SYNONYMOUS_CODING	<0.1	benign	1.232	Butyrophilin-like protein 2 [Source:UniProtKB/Swiss-Prot;Acc:O70355]	D/A	71	TRUE
	ss159821392	17	34495062	A/T	A	T	T	T	ENSMUSG00000024340	ENSMUST00000025198	Btnl2	NON_SYNONYMOUS_CODING	0.132	probably damaging	2.012	Butyrophilin-like protein 2 [Source:UniProtKB/Swiss-Prot;Acc:O70355]	E/V	82	TRUE
	ss159827912	17	34495249	A/T	A		T		ENSMUSG00000024340	ENSMUST00000025198		SPLICE_SITE,INTRONIC	<0.1						TRUE
	Sudbery et al 2009	17	34497922	G/A	G	A		A	ENSMUST00000025198	ENSMUSG00000024340	Btnl2-001	SYNONYMOUS_CODING	0.617			butyrophilin-like 2 Gene [Source:MGI (curated);Acc:Btnl2-001]	Q		TRUE
	Sudbery et al 2009	17	34500387	A/G	A		G		ENSMUST00000025198	ENSMUSG00000024340	Btnl2-001	SYNONYMOUS_CODING	0.989			butyrophilin-like 2 Gene [Source:MGI (curated);Acc:Btnl2-001]	Q		TRUE
	ss159821402	17	34500464	G/A	G	A		A	ENSMUSG00000024340	ENSMUST00000025198	Btnl2	NON_SYNONYMOUS_CODING	0.141	benign	1.304	Butyrophilin-like protein 2 [Source:UniProtKB/Swiss-Prot;Acc:O70355]	R/H	353	TRUE
	ss159821403	17	34500482	T/C	T	C	C	C	ENSMUSG00000024340	ENSMUST00000025198	Btnl2	NON_SYNONYMOUS_CODING,SPLICE_SITE	0.461	possibly damaging	1.85	Butyrophilin-like protein 2 [Source:UniProtKB/Swiss-Prot;Acc:O70355]	M/T	359	TRUE
	ss159821422	17	34503415	T/C	T	C	C	C	ENSMUSG00000024340	ENSMUST00000025198	Btnl2	NON_SYNONYMOUS_CODING	<0.1	benign	?	Butyrophilin-like protein 2 [Source:UniProtKB/Swiss-Prot;Acc:O70355]	W/R	482	TRUE
	ss159821477	17	34518029	T/C	T	C	C	C	ENSMUSG00000062638	ENSMUST00000080254	Btnl1	NON_SYNONYMOUS_CODING	<0.1	benign	0.689	Butyrophilin-like protein 1 Precursor [Source:UniProtKB/Swiss-Prot;Acc:Q7TST0]	M/T	187	TRUE
	ss159821477	17	34518029	T/C	T	C	C	C	ENSMUSG00000062638	ENSMUST00000114181	Btnl1	NON_SYNONYMOUS_CODING	<0.1	benign	0.674	Butyrophilin-like protein 1 Precursor [Source:UniProtKB/Swiss-Prot;Acc:Q7TST0]	M/T	187	TRUE
	ENSMUSSNP3421047	17	34597021	A/C	A	A	A	A	ENSMUSG00000057246	ENSMUST00000068051	Tesb	NON_SYNONYMOUS_CODING	0.119	benign	-0.225	hypothetical protein LOC407788 [Source:RefSeq peptide;Acc:NP_001001177]	Q/P	254	FALSE
	ENSMUSSNP3421047	17	34597021	A/C	A	A	A	A	ENSMUSG00000057246	ENSMUST00000078615	Tesb	NON_SYNONYMOUS_CODING	0.119	benign	-0.225	hypothetical protein LOC407788 [Source:RefSeq peptide;Acc:NP_001001177]	Q/P	264	FALSE
	ENSMUSSNP3421047	17	34597021	A/C	A	A	A	A	ENSMUSG00000057246	ENSMUST00000097348	Tesb	NON_SYNONYMOUS_CODING	0.119	benign	-0.225	hypothetical protein LOC407788 [Source:RefSeq peptide;Acc:NP_001001177]	Q/P	271	FALSE
	ENSMUSSNP3421047	17	34597021	A/C	A	A	A	A	ENSMUSG00000057246	ENSMUST00000114173	Tesb	NON_SYNONYMOUS_CODING	0.119	benign	-0.225	hypothetical protein LOC407788 [Source:RefSeq peptide;Acc:NP_001001177]	Q/P	271	FALSE
	ENSMUSSNP3421047	17	34597021	A/C	A	A	A	A	ENSMUSG00000057246	ENSMUST00000114175	Tesb	NON_SYNONYMOUS_CODING	0.119	benign	-0.225	hypothetical protein LOC407788 [Source:RefSeq peptide;Acc:NP_001001177]	Q/P	254	FALSE
	Sudbery et al 2009	17	34597021	A/C	A	C			ENSMUST00000114175	ENSMUSG00000057246	Tesb-001	3PRIME_UTR	0.119			testis specific basic protein Gene [Source:MGI (curated);Acc:Tesb-001]	Q/P		TRUE
	Sudbery et al 2009	17	34597022	G/A	G	A			ENSMUST00000114175	ENSMUSG00000057246	Tesb-001	3PRIME_UTR	<0.1			testis specific basic protein Gene [Source:MGI (curated);Acc:Tesb-001]	Q		TRUE
	ENSMUSSNP6894611	17	34605689	C/T	C	T	C		ENSMUSG00000058435	ENSMUST00000114166	0	SPLICE_SITE,INTRONIC	<0.1	0	0	0			FALSE
	ENSMUSSNP5667266	17	34606054	A/G	A	A	A	A	ENSMUSG00000058435	ENSMUST00000114166	Btn3a3	NON_SYNONYMOUS_CODING	<0.1	benign	0.73	butyrophilin, subfamily 3, member A3 [Source:RefSeq peptide;Acc:NP_109671]	V/A	565	FALSE
	rs52083012	17	34606151	T/C	T		T		ENSMUSG00000058435	ENSMUST00000114166	Btn3a3	NON_SYNONYMOUS_CODING	0.533	benign	-0.033	butyrophilin, subfamily 3, member A3 [Source:RefSeq peptide;Acc:NP_109671]	K/E	533	FALSE
	rs52293914	17	34606152	C/A	C	C	C	C	ENSMUSG00000058435	ENSMUST00000114166	Btn3a3	NON_SYNONYMOUS_CODING	0.549	possibly damaging	-0.555	butyrophilin, subfamily 3, member A3 [Source:RefSeq peptide;Acc:NP_109671]	R/S	532	FALSE
	rs52291859	17	34606163	T/A	T		T		ENSMUSG00000058435	ENSMUST00000114166	Btn3a3	NON_SYNONYMOUS_CODING	0.626	probably damaging	-0.849	butyrophilin, subfamily 3, member A3 [Source:RefSeq peptide;Acc:NP_109671]	R/W	529	FALSE
	ENSMUSSNP3227407	17	34606171	T/C	T		T		ENSMUSG00000058435	ENSMUST00000114166	Btn3a3	NON_SYNONYMOUS_CODING	0.586	benign	1.17	butyrophilin, subfamily 3, member A3 [Source:RefSeq peptide;Acc:NP_109671]	K/R	526	FALSE
	rs48789592	17	34606315	G/T	G	G	G	G	ENSMUSG00000058435	ENSMUST00000114166	Btn3a3	NON_SYNONYMOUS_CODING	0.426	probably damaging	2.634	butyrophilin, subfamily 3, member A3 [Source:RefSeq peptide;Acc:NP_109671]	P/H	478	FALSE
	rs47877066	17	34606400	G/C	G		G		ENSMUSG00000058435	ENSMUST00000114166	Btn3a3	NON_SYNONYMOUS_CODING	<0.1	benign	0.722	butyrophilin, subfamily 3, member A3 [Source:RefSeq peptide;Acc:NP_109671]	L/V	450	FALSE
	ENSMUSSNP2078669	17	34606408	A/G	A	A	A	A	ENSMUSG00000058435	ENSMUST00000114166	Btn3a3	NON_SYNONYMOUS_CODING	<0.1	benign	0.754	butyrophilin, subfamily 3, member A3 [Source:RefSeq peptide;Acc:NP_109671]	L/S	447	FALSE
	rs50056172	17	34606722	C/A	C	C	C	C	ENSMUSG00000058435	ENSMUST00000114166	Btn3a3	NON_SYNONYMOUS_CODING,SPLICE_SITE	0.16	benign	0.93	butyrophilin, subfamily 3, member A3 [Source:RefSeq peptide;Acc:NP_109671]	W/C	342	FALSE
	rs50056172	17	34606722	C/A	C	C	C	C	ENSMUSG00000058435	ENSMUST00000080904	Btn3a3	NON_SYNONYMOUS_CODING,SPLICE_SITE	0.16	benign	1.618	butyrophilin, subfamily 3, member A3 [Source:RefSeq peptide;Acc:NP_109671]	W/C	313	FALSE
	rs45950735	17	34607944	T/C	T	T	T	T	ENSMUSG00000058435	ENSMUST00000114166	Btn3a3	NON_SYNONYMOUS_CODING	0.998	benign	1.119	butyrophilin, subfamily 3, member A3 [Source:RefSeq peptide;Acc:NP_109671]	K/R	326	FALSE
	rs45950735	17	34607944	T/C	T	T	T	T	ENSMUSG00000058435	ENSMUST00000080904	Btn3a3	NON_SYNONYMOUS_CODING	0.998	benign	0.794	butyrophilin, subfamily 3, member A3 [Source:RefSeq peptide;Acc:NP_109671]	K/R	297	FALSE
	rs50218359	17	34609313	C/A	C	A	C		ENSMUSG00000058435	ENSMUST00000080904	Btn3a3	NON_SYNONYMOUS_CODING,SPLICE_SITE	<0.1	benign	0.345	butyrophilin, subfamily 3, member A3 [Source:RefSeq peptide;Acc:NP_109671]	R/L	285	FALSE
	rs50218359	17	34609313	C/A	C	A	C		ENSMUSG00000058435	ENSMUST00000114166	Btn3a3	NON_SYNONYMOUS_CODING,SPLICE_SITE	<0.1	benign	0.794	butyrophilin, subfamily 3, member A3 [Source:RefSeq peptide;Acc:NP_109671]	R/L	314	FALSE
	rs51698166	17	34609331	C/T	C	C	C	C	ENSMUSG00000058435	ENSMUST00000114166	Btn3a3	NON_SYNONYMOUS_CODING	0.314	benign	0.042	butyrophilin, subfamily 3, member A3 [Source:RefSeq peptide;Acc:NP_109671]	G/D	308	FALSE
	rs51698166	17	34609331	C/T	C	C	C	C	ENSMUSG00000058435	ENSMUST00000080904	Btn3a3	NON_SYNONYMOUS_CODING,SPLICE_SITE	0.314	benign	0.66	butyrophilin, subfamily 3, member A3 [Source:RefSeq peptide;Acc:NP_109671]	G/D	279	FALSE
	ss159821613	17	34609569	A/T	A	T			ENSMUSG00000058435	ENSMUST00000114166	Btn3a3	NON_SYNONYMOUS_CODING	<0.1	benign	0.249	butyrophilin, subfamily 3, member A3 [Source:RefSeq peptide;Acc:NP_109671]	L/Q	297	TRUE
	ss159821614	17	34609581	T/A	T	A			ENSMUSG00000058435	ENSMUST00000114166	Btn3a3	NON_SYNONYMOUS_CODING	<0.1	benign	0.013	butyrophilin, subfamily 3, member A3 [Source:RefSeq peptide;Acc:NP_109671]	K/M	293	TRUE
	rs33389488	17	34609641	C/A	C	-	C	A	ENSMUSG00000058435	ENSMUST00000114166	Btn3a3	NON_SYNONYMOUS_CODING	<0.1	benign	-0.072	butyrophilin, subfamily 3, member A3 [Source:RefSeq peptide;Acc:NP_109671]	R/I	273	FALSE
	rs47395805	17	34611041	A/T	A	A	T	T	ENSMUSG00000058435	ENSMUST00000080904	Btn3a3	NON_SYNONYMOUS_CODING	<0.1	benign	1.263	butyrophilin, subfamily 3, member A3 [Source:RefSeq peptide;Acc:NP_109671]	L/Q	153	FALSE
	rs47395805	17	34611041	A/T	A	A	T	T	ENSMUSG00000058435	ENSMUST00000114166	Btn3a3	NON_SYNONYMOUS_CODING	<0.1	benign	1.184	butyrophilin, subfamily 3, member A3 [Source:RefSeq peptide;Acc:NP_109671]	L/Q	115	FALSE
	ss159821616	17	34611150	A/C	A	C			ENSMUSG00000058435	ENSMUST00000114166	Btn3a3	NON_SYNONYMOUS_CODING	<0.1	benign	0.949	butyrophilin, subfamily 3, member A3 [Source:RefSeq peptide;Acc:NP_109671]	F/V	79	TRUE
	ss159821616	17	34611150	A/C	A	C			ENSMUSG00000058435	ENSMUST00000080904	Btn3a3	NON_SYNONYMOUS_CODING	<0.1	benign	0.73	butyrophilin, subfamily 3, member A3 [Source:RefSeq peptide;Acc:NP_109671]	F/V	117	TRUE
	rs49182541	17	34611161	T/G	T		T	T	ENSMUSG00000058435	ENSMUST00000114166	Btn3a3	NON_SYNONYMOUS_CODING	0.744	benign	0.027	butyrophilin, subfamily 3, member A3 [Source:RefSeq peptide;Acc:NP_109671]	E/A	75	FALSE
	rs49182541	17	34611161	T/G	T		T	T	ENSMUSG00000058435	ENSMUST00000080904	Btn3a3	NON_SYNONYMOUS_CODING	0.744	benign	0.32	butyrophilin, subfamily 3, member A3 [Source:RefSeq peptide;Acc:NP_109671]	E/A	113	FALSE
	rs46516658	17	34627807	T/C	T		T		ENSMUSG00000073420	ENSMUST00000097346	Btnl5	NON_SYNONYMOUS_CODING	0.865	probably damaging	-1.024	butyrophilin-like 5 (Btnl5), non-coding RNA [Source:RefSeq DNA;Acc:NR_004051]	Y/C	301	FALSE
	rs49186761	17	34627831	G/A	G	-	G		ENSMUSG00000073420	ENSMUST00000097346		SPLICE_SITE,INTRONIC	0.94						FALSE
	rs48507435	17	34630178	A/C	A	A	A	A	ENSMUSG00000073420	ENSMUST00000097346	Btnl5	NON_SYNONYMOUS_CODING	0.106	benign	-0.545	butyrophilin-like 5 (Btnl5), non-coding RNA [Source:RefSeq DNA;Acc:NR_004051]	N/K	206	FALSE
	ss159821637	17	34630192	T/A	T	A		A	ENSMUSG00000073420	ENSMUST00000097346	Btnl5	NON_SYNONYMOUS_CODING	<0.1	probably damaging	2.17	butyrophilin-like 5 (Btnl5), non-coding RNA [Source:RefSeq DNA;Acc:NR_004051]	S/C	202	TRUE
	rs46221021	17	34631116	G/T	G	T	G		ENSMUSG00000073420	ENSMUST00000097346	Btnl5	NON_SYNONYMOUS_CODING	<0.1	benign	0.779	butyrophilin-like 5 (Btnl5), non-coding RNA [Source:RefSeq DNA;Acc:NR_004051]	L/I	162	FALSE
	rs48735622	17	34631236	T/C	T		-		ENSMUSG00000073420	ENSMUST00000097346	Btnl5	NON_SYNONYMOUS_CODING	0.377	benign	0.029	butyrophilin-like 5 (Btnl5), non-coding RNA [Source:RefSeq DNA;Acc:NR_004051]	K/E	122	TRUE
	rs51602329	17	34631383	C/T	C	T	-		ENSMUSG00000073420	ENSMUST00000097346	Btnl5	NON_SYNONYMOUS_CODING	<0.1	possibly damaging	1.929	butyrophilin-like 5 (Btnl5), non-coding RNA [Source:RefSeq DNA;Acc:NR_004051]	G/S	73	TRUE
	Sudbery et al 2009	17	34632954	G/A	G	A		A	ENSMUST00000097346	ENSMUSG00000073420	Btnl5-001	NON_SYNONYMOUS_CODING	<0.1	benign	0.2	butyrophilin-like 5 Pseudogene [Source:MGI (curated);Acc:Btnl5-001]	R/W		TRUE
	ENSMUSSNP4548390	17	34632954	G/A	G	G		G	ENSMUSG00000073420	ENSMUST00000097346	Btnl5	NON_SYNONYMOUS_CODING	<0.1	benign	-0.782	butyrophilin-like 5 (Btnl5), non-coding RNA [Source:RefSeq DNA;Acc:NR_004051]	R/W	37	FALSE
	Sudbery et al 2009	17	34632955	T/G	T	G		G	ENSMUST00000097346	ENSMUSG00000073420	Btnl5-001	SYNONYMOUS_CODING	<0.1			butyrophilin-like 5 Pseudogene [Source:MGI (curated);Acc:Btnl5-001]	G		TRUE
	ENSMUSSNP846191	17	34634096	T/C	T	T			ENSMUSG00000073420	ENSMUST00000097346	Btnl5	NON_SYNONYMOUS_CODING	<0.1	benign	1.125	butyrophilin-like 5 (Btnl5), non-coding RNA [Source:RefSeq DNA;Acc:NR_004051]	K/R	5	FALSE
	Sudbery et al 2009	17	34644893	A/C	A	C		C	ENSMUST00000114163	ENSMUSG00000058762	Btnl6-001	NON_SYNONYMOUS_CODING	<0.1	benign	0	butyrophilin-like 6 Gene [Source:MGI (curated);Acc:Btnl6-001]	M/R		TRUE
	Sudbery et al 2009	17	34644915	C/T	C	T			ENSMUST00000114163	ENSMUSG00000058762	Btnl6-001	NON_SYNONYMOUS_CODING	0.152	benign	0	butyrophilin-like 6 Gene [Source:MGI (curated);Acc:Btnl6-001]	G/R		TRUE
	Sudbery et al 2009	17	34644974	G/A	G	A			ENSMUST00000114163	ENSMUSG00000058762	Btnl6-001	NON_SYNONYMOUS_CODING	<0.1	benign	1.227	butyrophilin-like 6 Gene [Source:MGI (curated);Acc:Btnl6-001]	A/V		TRUE
	Sudbery et al 2009	17	34644980	T/G	T	G			ENSMUST00000114163	ENSMUSG00000058762	Btnl6-001	NON_SYNONYMOUS_CODING	<0.1	benign	1.452	butyrophilin-like 6 Gene [Source:MGI (curated);Acc:Btnl6-001]	E/A		TRUE
	Sudbery et al 2009	17	34644989	T/A	T		A		ENSMUST00000114163	ENSMUSG00000058762	Btnl6-001	NON_SYNONYMOUS_CODING	<0.1	possibly damaging	1.965	butyrophilin-like 6 Gene [Source:MGI (curated);Acc:Btnl6-001]	N/I		TRUE
	Sudbery et al 2009	17	34645013	C/G	C		G		ENSMUST00000114163	ENSMUSG00000058762	Btnl6-001	NON_SYNONYMOUS_CODING	<0.1	benign	0.63	butyrophilin-like 6 Gene [Source:MGI (curated);Acc:Btnl6-001]	S/T		TRUE
	rs48141160	17	34645013	C/G	C		G	G	ENSMUSG00000058762	ENSMUST00000075483	Btnl6	NON_SYNONYMOUS_CODING	<0.1	benign	0.63	butyrophilin-like 6 [Source:RefSeq peptide;Acc:NP_109672]	S/T	496	TRUE
	rs48141160	17	34645013	C/G	C		G	G	ENSMUSG00000058762	ENSMUST00000114163	Btnl6	NON_SYNONYMOUS_CODING	<0.1	benign	0.63	butyrophilin-like 6 [Source:RefSeq peptide;Acc:NP_109672]	S/T	496	TRUE
	rs47867628	17	34645173	T/C	T	C	C	C	ENSMUSG00000058762	ENSMUST00000075483	Btnl6	NON_SYNONYMOUS_CODING	<0.1	benign	0.54	butyrophilin-like 6 [Source:RefSeq peptide;Acc:NP_109672]	T/A	443	TRUE
	rs47867628	17	34645173	T/C	T	C	C	C	ENSMUSG00000058762	ENSMUST00000114163	Btnl6	NON_SYNONYMOUS_CODING	<0.1	benign	0.54	butyrophilin-like 6 [Source:RefSeq peptide;Acc:NP_109672]	T/A	443	TRUE
	Sudbery et al 2009	17	34645268	A/T	A			T	ENSMUST00000114163	ENSMUSG00000058762	Btnl6-001	NON_SYNONYMOUS_CODING	<0.1	benign	0.422	butyrophilin-like 6 Gene [Source:MGI (curated);Acc:Btnl6-001]	V/D		TRUE
	rs49147261	17	34645268	A/T	A				ENSMUSG00000058762	ENSMUST00000075483	Btnl6	NON_SYNONYMOUS_CODING	<0.1	benign	0.422	butyrophilin-like 6 [Source:RefSeq peptide;Acc:NP_109672]	V/D	411	TRUE
	rs49147261	17	34645268	A/T	A				ENSMUSG00000058762	ENSMUST00000114163	Btnl6	NON_SYNONYMOUS_CODING	<0.1	benign	0.422	butyrophilin-like 6 [Source:RefSeq peptide;Acc:NP_109672]	V/D	411	TRUE
	Sudbery et al 2009	17	34645288	A/C	A	C		C	ENSMUST00000114163	ENSMUSG00000058762	Btnl6-001	SYNONYMOUS_CODING	0.652			butyrophilin-like 6 Gene [Source:MGI (curated);Acc:Btnl6-001]	G		TRUE
	Sudbery et al 2009	17	34645313	A/C	A		C		ENSMUST00000114163	ENSMUSG00000058762	Btnl6-001	NON_SYNONYMOUS_CODING	<0.1	benign	0.308	butyrophilin-like 6 Gene [Source:MGI (curated);Acc:Btnl6-001]	I/R		TRUE
	rs47289933	17	34645313	A/C	A		C		ENSMUSG00000058762	ENSMUST00000075483	Btnl6	NON_SYNONYMOUS_CODING	<0.1	benign	0.308	butyrophilin-like 6 [Source:RefSeq peptide;Acc:NP_109672]	I/R	396	TRUE
	rs47289933	17	34645313	A/C	A		C		ENSMUSG00000058762	ENSMUST00000114163	Btnl6	NON_SYNONYMOUS_CODING	<0.1	benign	0.308	butyrophilin-like 6 [Source:RefSeq peptide;Acc:NP_109672]	I/R	396	TRUE
	Sudbery et al 2009	17	34645314	T/C	T		C		ENSMUST00000114163	ENSMUSG00000058762	Btnl6-001	NON_SYNONYMOUS_CODING	<0.1	benign	0.192	butyrophilin-like 6 Gene [Source:MGI (curated);Acc:Btnl6-001]	I/V		TRUE
	Sudbery et al 2009	17	34645341	A/G	A			G	ENSMUST00000114163	ENSMUSG00000058762	Btnl6-001	NON_SYNONYMOUS_CODING	0.289	possibly damaging	1.772	butyrophilin-like 6 Gene [Source:MGI (curated);Acc:Btnl6-001]	Y/H		TRUE
	ss159828103	17	34645364	A/C	A		C		ENSMUSG00000058762	ENSMUST00000075483	Btnl6	NON_SYNONYMOUS_CODING	<0.1	benign	0.128	butyrophilin-like 6 [Source:RefSeq peptide;Acc:NP_109672]	I/S	379	TRUE
	ss159828103	17	34645364	A/C	A		C		ENSMUSG00000058762	ENSMUST00000114163	Btnl6	NON_SYNONYMOUS_CODING	<0.1	benign	0.128	butyrophilin-like 6 [Source:RefSeq peptide;Acc:NP_109672]	I/S	379	TRUE
	Sudbery et al 2009	17	34645376	C/G	C	G			ENSMUST00000114163	ENSMUSG00000058762	Btnl6-001	NON_SYNONYMOUS_CODING	<0.1	possibly damaging	1.62	butyrophilin-like 6 Gene [Source:MGI (curated);Acc:Btnl6-001]	C/S		TRUE
	ss159828105	17	34645377	A/T	A		T		ENSMUSG00000058762	ENSMUST00000075483	Btnl6	NON_SYNONYMOUS_CODING	<0.1	possibly damaging	1.62	butyrophilin-like 6 [Source:RefSeq peptide;Acc:NP_109672]	C/S	375	TRUE
	ss159828105	17	34645377	A/T	A		T		ENSMUSG00000058762	ENSMUST00000114163	Btnl6	NON_SYNONYMOUS_CODING	<0.1	possibly damaging	1.62	butyrophilin-like 6 [Source:RefSeq peptide;Acc:NP_109672]	C/S	375	TRUE
	ss159828106	17	34645403	A/G	A		G		ENSMUSG00000058762	ENSMUST00000075483	Btnl6	NON_SYNONYMOUS_CODING	<0.1	benign	0.009	butyrophilin-like 6 [Source:RefSeq peptide;Acc:NP_109672]	F/S	366	TRUE
	ss159828106	17	34645403	A/G	A		G		ENSMUSG00000058762	ENSMUST00000114163	Btnl6	NON_SYNONYMOUS_CODING	<0.1	benign	0.009	butyrophilin-like 6 [Source:RefSeq peptide;Acc:NP_109672]	F/S	366	TRUE
	ss159828107	17	34645421	G/C	G		C		ENSMUSG00000058762	ENSMUST00000075483	Btnl6	NON_SYNONYMOUS_CODING	<0.1	benign	0.623	butyrophilin-like 6 [Source:RefSeq peptide;Acc:NP_109672]	T/S	360	TRUE
	ss159828107	17	34645421	G/C	G		C		ENSMUSG00000058762	ENSMUST00000114163	Btnl6	NON_SYNONYMOUS_CODING	<0.1	benign	0.623	butyrophilin-like 6 [Source:RefSeq peptide;Acc:NP_109672]	T/S	360	TRUE
	Sudbery et al 2009	17	34645428	T/A	T	A			ENSMUST00000114163	ENSMUSG00000058762	Btnl6-001	NON_SYNONYMOUS_CODING	<0.1	benign	0.25	butyrophilin-like 6 Gene [Source:MGI (curated);Acc:Btnl6-001]	R/W		TRUE
	rs47114557	17	34645839	T/C	T				ENSMUSG00000058762	ENSMUST00000075483	Btnl6	NON_SYNONYMOUS_CODING	0.811	possibly damaging	1.663	butyrophilin-like 6 [Source:RefSeq peptide;Acc:NP_109672]	Q/R	337	TRUE
	rs47114557	17	34645839	T/C	T				ENSMUSG00000058762	ENSMUST00000114163	Btnl6	NON_SYNONYMOUS_CODING	0.811	possibly damaging	1.663	butyrophilin-like 6 [Source:RefSeq peptide;Acc:NP_109672]	Q/R	337	TRUE
	rs47025948	17	34645845	T/A	T				ENSMUSG00000058762	ENSMUST00000075483	Btnl6	NON_SYNONYMOUS_CODING	0.298	benign	0.913	butyrophilin-like 6 [Source:RefSeq peptide;Acc:NP_109672]	Q/L	335	TRUE
	rs47025948	17	34645845	T/A	T				ENSMUSG00000058762	ENSMUST00000114163	Btnl6	NON_SYNONYMOUS_CODING	0.298	benign	0.913	butyrophilin-like 6 [Source:RefSeq peptide;Acc:NP_109672]	Q/L	335	TRUE
	Sudbery et al 2009	17	34650588	C/A	C	A		A	ENSMUST00000114163	ENSMUSG00000058762	Btnl6-001	NON_SYNONYMOUS_CODING	<0.1	benign	0.795	butyrophilin-like 6 Gene [Source:MGI (curated);Acc:Btnl6-001]	R/M		TRUE
	Sudbery et al 2009	17	34650606	T/C	T	C		C	ENSMUST00000114163	ENSMUSG00000058762	Btnl6-001	NON_SYNONYMOUS_CODING	<0.1	benign	0.066	butyrophilin-like 6 Gene [Source:MGI (curated);Acc:Btnl6-001]	Q/R		TRUE
	rs49003639	17	34650606	T/C	T	C	C	C	ENSMUSG00000058762	ENSMUST00000075483	Btnl6	NON_SYNONYMOUS_CODING	<0.1	benign	0.066	butyrophilin-like 6 [Source:RefSeq peptide;Acc:NP_109672]	Q/R	313	TRUE
	rs49003639	17	34650606	T/C	T	C	C	C	ENSMUSG00000058762	ENSMUST00000114163	Btnl6	NON_SYNONYMOUS_CODING	<0.1	benign	0.066	butyrophilin-like 6 [Source:RefSeq peptide;Acc:NP_109672]	Q/R	313	TRUE
	Sudbery et al 2009	17	34651022	A/G	A	G		G	ENSMUST00000114163	ENSMUSG00000058762	Btnl6-001	NON_SYNONYMOUS_CODING	<0.1	benign	0.273	butyrophilin-like 6 Gene [Source:MGI (curated);Acc:Btnl6-001]	F/L		TRUE
	rs51696402	17	34651022	A/G	A	G	G		ENSMUSG00000058762	ENSMUST00000075483	Btnl6	NON_SYNONYMOUS_CODING	<0.1	benign	0.273	butyrophilin-like 6 [Source:RefSeq peptide;Acc:NP_109672]	F/L	271	TRUE
	rs51696402	17	34651022	A/G	A	G	G		ENSMUSG00000058762	ENSMUST00000114163	Btnl6	NON_SYNONYMOUS_CODING	<0.1	benign	0.273	butyrophilin-like 6 [Source:RefSeq peptide;Acc:NP_109672]	F/L	271	TRUE
	Sudbery et al 2009	17	34651069	A/C	A	C			ENSMUST00000114163	ENSMUSG00000058762	Btnl6-001	NON_SYNONYMOUS_CODING	<0.1	benign	0.093	butyrophilin-like 6 Gene [Source:MGI (curated);Acc:Btnl6-001]	V/G		TRUE
	rs48992697	17	34651073	A/G	A		G		ENSMUSG00000058762	ENSMUST00000075483	Btnl6	NON_SYNONYMOUS_CODING	<0.1	benign	0.34	butyrophilin-like 6 [Source:RefSeq peptide;Acc:NP_109672]	F/L	254	TRUE
	rs48992697	17	34651073	A/G	A		G		ENSMUSG00000058762	ENSMUST00000114163	Btnl6	NON_SYNONYMOUS_CODING	<0.1	benign	0.34	butyrophilin-like 6 [Source:RefSeq peptide;Acc:NP_109672]	F/L	254	TRUE
	Sudbery et al 2009	17	34651077	T/A	T	A		A	ENSMUST00000114163	ENSMUSG00000058762	Btnl6-001	SYNONYMOUS_CODING	<0.1			butyrophilin-like 6 Gene [Source:MGI (curated);Acc:Btnl6-001]	A		TRUE
	Sudbery et al 2009	17	34651100	T/G	T	G			ENSMUST00000114163	ENSMUSG00000058762	Btnl6-001	NON_SYNONYMOUS_CODING	0.938	benign	0.12	butyrophilin-like 6 Gene [Source:MGI (curated);Acc:Btnl6-001]	K/Q		TRUE
	Sudbery et al 2009	17	34651104	A/G	A	G			ENSMUST00000114163	ENSMUSG00000058762	Btnl6-001	SYNONYMOUS_CODING	0.971			butyrophilin-like 6 Gene [Source:MGI (curated);Acc:Btnl6-001]	F		TRUE
	Sudbery et al 2009	17	34651258	A/G	A			G	ENSMUST00000114163	ENSMUSG00000058762	Btnl6-001	SYNONYMOUS_CODING	0.995			butyrophilin-like 6 Gene [Source:MGI (curated);Acc:Btnl6-001]	G		TRUE
	Sudbery et al 2009	17	34651267	G/A	G			A	ENSMUST00000114163	ENSMUSG00000058762	Btnl6-001	SYNONYMOUS_CODING	0.833			butyrophilin-like 6 Gene [Source:MGI (curated);Acc:Btnl6-001]	P		TRUE
	Sudbery et al 2009	17	34651277	G/A	G			A	ENSMUST00000114163	ENSMUSG00000058762	Btnl6-001	NON_SYNONYMOUS_CODING	0.914	benign	1.31	butyrophilin-like 6 Gene [Source:MGI (curated);Acc:Btnl6-001]	T/I		TRUE
	Sudbery et al 2009	17	34651288	G/C	G			C	ENSMUST00000114163	ENSMUSG00000058762	Btnl6-001	SYNONYMOUS_CODING	0.678			butyrophilin-like 6 Gene [Source:MGI (curated);Acc:Btnl6-001]	V		TRUE
	Sudbery et al 2009	17	34651291	G/A	G			A	ENSMUST00000114163	ENSMUSG00000058762	Btnl6-001	SYNONYMOUS_CODING	0.386			butyrophilin-like 6 Gene [Source:MGI (curated);Acc:Btnl6-001]	N		TRUE
	Sudbery et al 2009	17	34651330	C/T	C	T		T	ENSMUST00000114163	ENSMUSG00000058762	Btnl6-001	SYNONYMOUS_CODING	<0.1			butyrophilin-like 6 Gene [Source:MGI (curated);Acc:Btnl6-001]	T		TRUE
	Sudbery et al 2009	17	34651333	T/G	T	G		G	ENSMUST00000114163	ENSMUSG00000058762	Btnl6-001	NON_SYNONYMOUS_CODING	<0.1	benign	0.053	butyrophilin-like 6 Gene [Source:MGI (curated);Acc:Btnl6-001]	R/S		TRUE
	Sudbery et al 2009	17	34651358	C/T	C	T			ENSMUST00000114163	ENSMUSG00000058762	Btnl6-001	NON_SYNONYMOUS_CODING	<0.1	benign	0.132	butyrophilin-like 6 Gene [Source:MGI (curated);Acc:Btnl6-001]	S/N		TRUE
	Sudbery et al 2009	17	34651359	T/G	T	G	G		ENSMUST00000114163	ENSMUSG00000058762	Btnl6-001	NON_SYNONYMOUS_CODING	<0.1	benign	0.145	butyrophilin-like 6 Gene [Source:MGI (curated);Acc:Btnl6-001]	S/R		TRUE
	Sudbery et al 2009	17	34651423	T/C	T		C		ENSMUST00000114163	ENSMUSG00000058762	Btnl6-001	SYNONYMOUS_CODING	0.793			butyrophilin-like 6 Gene [Source:MGI (curated);Acc:Btnl6-001]	P		TRUE
	Sudbery et al 2009	17	34651438	A/G	A	G		G	ENSMUST00000114163	ENSMUSG00000058762	Btnl6-001	SYNONYMOUS_CODING	0.214			butyrophilin-like 6 Gene [Source:MGI (curated);Acc:Btnl6-001]	T		TRUE
	Sudbery et al 2009	17	34651441	A/C	A	C		C	ENSMUST00000114163	ENSMUSG00000058762	Btnl6-001	NON_SYNONYMOUS_CODING	0.222	benign	0.894	butyrophilin-like 6 Gene [Source:MGI (curated);Acc:Btnl6-001]	I/M		TRUE
	Sudbery et al 2009	17	34651456	T/C	T			C	ENSMUST00000114163	ENSMUSG00000058762	Btnl6-001	SYNONYMOUS_CODING	<0.1			butyrophilin-like 6 Gene [Source:MGI (curated);Acc:Btnl6-001]	V		TRUE
	Sudbery et al 2009	17	34651465	G/A	G			A	ENSMUST00000114163	ENSMUSG00000058762	Btnl6-001	SYNONYMOUS_CODING	<0.1			butyrophilin-like 6 Gene [Source:MGI (curated);Acc:Btnl6-001]	D		TRUE
	rs46253725	17	34652362	T/G	T	T			ENSMUSG00000058762	ENSMUST00000075483	Btnl6	NON_SYNONYMOUS_CODING	<0.1	benign	0.568	butyrophilin-like 6 [Source:RefSeq peptide;Acc:NP_109672]	I/L	124	FALSE
	rs46253725	17	34652362	T/G	T	T			ENSMUSG00000058762	ENSMUST00000114163	Btnl6	NON_SYNONYMOUS_CODING	<0.1	benign	0.568	butyrophilin-like 6 [Source:RefSeq peptide;Acc:NP_109672]	I/L	124	FALSE
	rs50576946	17	34652374	G/A	G	A		A	ENSMUSG00000058762	ENSMUST00000075483	Btnl6	NON_SYNONYMOUS_CODING	<0.1	benign	1.162	butyrophilin-like 6 [Source:RefSeq peptide;Acc:NP_109672]	P/S	120	TRUE
	rs50576946	17	34652374	G/A	G	A		A	ENSMUSG00000058762	ENSMUST00000114163	Btnl6	NON_SYNONYMOUS_CODING	<0.1	benign	1.162	butyrophilin-like 6 [Source:RefSeq peptide;Acc:NP_109672]	P/S	120	TRUE
	ENSMUSSNP5863289	17	34652380	G/A	G	-	G	G	ENSMUSG00000058762	ENSMUST00000075483		STOP_GAINED	0.426				Q/*	118	FALSE
	ENSMUSSNP5863289	17	34652380	G/A	G	-	G	G	ENSMUSG00000058762	ENSMUST00000114163		STOP_GAINED	0.426				Q/*	118	FALSE
	Sudbery et al 2009	17	34652388	A/T	A		T		ENSMUST00000114163	ENSMUSG00000058762	Btnl6-001	NON_SYNONYMOUS_CODING	0.246	benign	0.968	butyrophilin-like 6 Gene [Source:MGI (curated);Acc:Btnl6-001]	L/Q		TRUE
	rs48119293	17	34652388	A/T	A	T			ENSMUSG00000058762	ENSMUST00000075483	Btnl6	NON_SYNONYMOUS_CODING	0.246	benign	0.968	butyrophilin-like 6 [Source:RefSeq peptide;Acc:NP_109672]	L/Q	115	TRUE
	rs48119293	17	34652388	A/T	A	T			ENSMUSG00000058762	ENSMUST00000114163	Btnl6	NON_SYNONYMOUS_CODING	0.246	benign	0.968	butyrophilin-like 6 [Source:RefSeq peptide;Acc:NP_109672]	L/Q	115	TRUE
	Sudbery et al 2009	17	34652394	C/T	C		T		ENSMUST00000114163	ENSMUSG00000058762	Btnl6-001	NON_SYNONYMOUS_CODING	<0.1	benign	0.828	butyrophilin-like 6 Gene [Source:MGI (curated);Acc:Btnl6-001]	R/K		TRUE
	Sudbery et al 2009	17	34652422	G/T	G	T		T	ENSMUST00000114163	ENSMUSG00000058762	Btnl6-001	NON_SYNONYMOUS_CODING	<0.1	benign	0.482	butyrophilin-like 6 Gene [Source:MGI (curated);Acc:Btnl6-001]	Q/K		TRUE
	ENSMUSSNP749578	17	34652422	G/T	G	G	G	G	ENSMUSG00000058762	ENSMUST00000075483	Btnl6	NON_SYNONYMOUS_CODING	<0.1	benign	-0.138	butyrophilin-like 6 [Source:RefSeq peptide;Acc:NP_109672]	Q/K	104	FALSE
	ENSMUSSNP749578	17	34652422	G/T	G	G	G	G	ENSMUSG00000058762	ENSMUST00000114163	Btnl6	NON_SYNONYMOUS_CODING	<0.1	benign	-0.138	butyrophilin-like 6 [Source:RefSeq peptide;Acc:NP_109672]	Q/K	104	FALSE
	Sudbery et al 2009	17	34652423	C/G	C	G		G	ENSMUST00000114163	ENSMUSG00000058762	Btnl6-001	NON_SYNONYMOUS_CODING	<0.1	benign	0.893	butyrophilin-like 6 Gene [Source:MGI (curated);Acc:Btnl6-001]	E/D		TRUE
	rs49770915	17	34652423	C/G	C	-			ENSMUSG00000058762	ENSMUST00000075483	Btnl6	NON_SYNONYMOUS_CODING	<0.1	benign	0.893	butyrophilin-like 6 [Source:RefSeq peptide;Acc:NP_109672]	E/D	103	TRUE
	rs49770915	17	34652423	C/G	C	-			ENSMUSG00000058762	ENSMUST00000114163	Btnl6	NON_SYNONYMOUS_CODING	<0.1	benign	0.893	butyrophilin-like 6 [Source:RefSeq peptide;Acc:NP_109672]	E/D	103	TRUE
	ss159821691	17	34652445	T/A	T	A			ENSMUSG00000058762	ENSMUST00000075483	Btnl6	NON_SYNONYMOUS_CODING	<0.1	benign	0.869	butyrophilin-like 6 [Source:RefSeq peptide;Acc:NP_109672]	Q/L	96	TRUE
	ss159821691	17	34652445	T/A	T	A			ENSMUSG00000058762	ENSMUST00000114163	Btnl6	NON_SYNONYMOUS_CODING	<0.1	benign	0.869	butyrophilin-like 6 [Source:RefSeq peptide;Acc:NP_109672]	Q/L	96	TRUE
	rs50764851	17	34652454	T/C	T	T	T	T	ENSMUSG00000058762	ENSMUST00000075483	Btnl6	NON_SYNONYMOUS_CODING	<0.1	benign	0.054	butyrophilin-like 6 [Source:RefSeq peptide;Acc:NP_109672]	E/G	93	FALSE
	rs50764851	17	34652454	T/C	T	T	T	T	ENSMUSG00000058762	ENSMUST00000114163	Btnl6	NON_SYNONYMOUS_CODING	<0.1	benign	0.054	butyrophilin-like 6 [Source:RefSeq peptide;Acc:NP_109672]	E/G	93	FALSE
	Sudbery et al 2009	17	34652458	G/A	G		A		ENSMUST00000114163	ENSMUSG00000058762	Btnl6-001	NON_SYNONYMOUS_CODING	<0.1	benign	1.077	butyrophilin-like 6 Gene [Source:MGI (curated);Acc:Btnl6-001]	P/S		TRUE
	Sudbery et al 2009	17	34652461	A/T	A		T		ENSMUST00000114163	ENSMUSG00000058762	Btnl6-001	NON_SYNONYMOUS_CODING	<0.1	possibly damaging	1.61	butyrophilin-like 6 Gene [Source:MGI (curated);Acc:Btnl6-001]	L/M		TRUE
	rs51069302	17	34652461	A/T	A			A	ENSMUSG00000058762	ENSMUST00000075483	Btnl6	NON_SYNONYMOUS_CODING	<0.1	possibly damaging	2.263	butyrophilin-like 6 [Source:RefSeq peptide;Acc:NP_109672]	L/M	91	FALSE
	rs51069302	17	34652461	A/T	A			A	ENSMUSG00000058762	ENSMUST00000114163	Btnl6	NON_SYNONYMOUS_CODING	<0.1	possibly damaging	2.263	butyrophilin-like 6 [Source:RefSeq peptide;Acc:NP_109672]	L/M	91	FALSE
	rs48586867	17	34652569	T/A	T	A			ENSMUSG00000058762	ENSMUST00000075483	Btnl6	NON_SYNONYMOUS_CODING	<0.1	benign	0.968	butyrophilin-like 6 [Source:RefSeq peptide;Acc:NP_109672]	I/F	55	TRUE
	rs48586867	17	34652569	T/A	T	A			ENSMUSG00000058762	ENSMUST00000114163	Btnl6	NON_SYNONYMOUS_CODING	<0.1	benign	0.968	butyrophilin-like 6 [Source:RefSeq peptide;Acc:NP_109672]	I/F	55	TRUE
	rs48704884	17	34652643	T/G	T	G			ENSMUSG00000058762	ENSMUST00000075483	Btnl6	NON_SYNONYMOUS_CODING	0.922	possibly damaging	1.518	butyrophilin-like 6 [Source:RefSeq peptide;Acc:NP_109672]	E/A	30	TRUE
	rs48704884	17	34652643	T/G	T	G			ENSMUSG00000058762	ENSMUST00000114163	Btnl6	NON_SYNONYMOUS_CODING	0.922	possibly damaging	1.518	butyrophilin-like 6 [Source:RefSeq peptide;Acc:NP_109672]	E/A	30	TRUE
	rs51529272	17	34652651	G/A	G	G		G	ENSMUSG00000058762	ENSMUST00000114163		SPLICE_SITE,INTRONIC	0.99						FALSE
	ss159828140	17	34654239	A/G	A		G		ENSMUSG00000058762	ENSMUST00000075483	Btnl6	NON_SYNONYMOUS_CODING	<0.1	benign	0.039	butyrophilin-like 6 [Source:RefSeq peptide;Acc:NP_109672]	I/T	20	TRUE
	ss159828140	17	34654239	A/G	A		G		ENSMUSG00000058762	ENSMUST00000114163	Btnl6	NON_SYNONYMOUS_CODING	<0.1	benign	0.039	butyrophilin-like 6 [Source:RefSeq peptide;Acc:NP_109672]	I/T	20	TRUE
	rs51288851	17	34669866	C/A	C		A	A	ENSMUSG00000061728	ENSMUST00000023469		STOP_GAINED	<0.1				G/*	570	TRUE
	Sudbery et al 2009	17	34670007	C/T	C		T	T	ENSMUST00000023469	ENSMUSG00000061728	Btnl7	NON_SYNONYMOUS_CODING	<0.1	probably damaging	2.031	butyrophilin-like 7 Gene [Source:MGI (curated);Acc:Btnl7-001]	G/R		TRUE
	rs52366891	17	34670007	C/T	C				ENSMUSG00000061728	ENSMUST00000023469	Btnl7	NON_SYNONYMOUS_CODING	<0.1	probably damaging	2.031	butyrophilin-like 7 [Source:RefSeq peptide;Acc:NP_001075132]	G/R	523	TRUE
	Sudbery et al 2009	17	34670298	A/G	A			G	ENSMUST00000023469	ENSMUSG00000061728	Btnl7	NON_SYNONYMOUS_CODING	<0.1	probably damaging	2.423	butyrophilin-like 7 Gene [Source:MGI (curated);Acc:Btnl7-001]	F/L		TRUE
	rs33585897	17	34670298	A/G	A	G	A		ENSMUSG00000061728	ENSMUST00000023469	Btnl7	NON_SYNONYMOUS_CODING	<0.1	probably damaging	-0.55	butyrophilin-like 7 [Source:RefSeq peptide;Acc:NP_001075132]	F/L	426	FALSE
	ss159821701	17	34670333	T/C	T	C	C		ENSMUSG00000061728	ENSMUST00000023469	Btnl7	NON_SYNONYMOUS_CODING	<0.1	benign	0.809	butyrophilin-like 7 [Source:RefSeq peptide;Acc:NP_001075132]	K/R	414	TRUE
	rs46066044	17	34678521	C/T	C	T	C		ENSMUSG00000061728	ENSMUST00000023469	Btnl7	NON_SYNONYMOUS_CODING	0.281	benign	0.466	butyrophilin-like 7 [Source:RefSeq peptide;Acc:NP_001075132]	M/I	168	FALSE
	Sudbery et al 2009	17	34684516	C/T	C	T	T	T	ENSMUST00000023469	ENSMUSG00000061728	Btnl7-001	NON_SYNONYMOUS_CODING	<0.1	benign	0.346	butyrophilin-like 7 Gene [Source:MGI (curated);Acc:Btnl7-001]	G/S		TRUE
	ENSMUSSNP4599534	17	34684516	C/T	C	-	-	-	ENSMUSG00000061728	ENSMUST00000023469	Btnl7	NON_SYNONYMOUS_CODING	<0.1	benign	0.346	butyrophilin-like 7 [Source:RefSeq peptide;Acc:NP_001075132]	G/S	24	TRUE
	Sudbery et al 2009	17	34684517	T/A	T	A	A	A	ENSMUST00000023469	ENSMUSG00000061728	Btnl7-001	SYNONYMOUS_CODING	<0.1			butyrophilin-like 7 Gene [Source:MGI (curated);Acc:Btnl7-001]	L		TRUE
	ss159821758	17	34705331	T/C	T	C	C	C	ENSMUSG00000015468	ENSMUST00000015612	0	SPLICE_SITE,INTRONIC	<0.1	0	0	0			TRUE
	Sudbery et al 2009	17	34705543	C/T	C		T		ENSMUST00000015612	ENSMUSG00000015468	Notch4-001	SYNONYMOUS_CODING	1			Notch gene homolog 4 (Drosophila) Gene [Source:MGI (curated);Acc:Notch4-001]	S		TRUE
	Sudbery et al 2009	17	34709536	T/C	T	C			ENSMUST00000015612	ENSMUSG00000015468	Notch4-001	NON_SYNONYMOUS_CODING	0.915	possibly damaging	1.856	Notch gene homolog 4 (Drosophila) Gene [Source:MGI (curated);Acc:Notch4-001]	Y/H		TRUE
	ss159828240	17	34709536	T/C	T		C	C	ENSMUSG00000015468	ENSMUST00000015612	Notch4	NON_SYNONYMOUS_CODING	0.915	possibly damaging	1.856	Neurogenic locus notch homolog protein 4 Precursor (Notch 4) [Contains Transforming protein Int-3;Notch 4 extracellular truncation;Notch 4 intracellular domain] [Source:UniProtKB/Swiss-Prot;Acc:P31695]	Y/H	571	TRUE
	ss159828243	17	34717909	C/A	C		A	A	ENSMUSG00000015468	ENSMUST00000015612	Notch4	NON_SYNONYMOUS_CODING	<0.1	possibly damaging	1.699	Neurogenic locus notch homolog protein 4 Precursor (Notch 4) [Contains Transforming protein Int-3;Notch 4 extracellular truncation;Notch 4 intracellular domain] [Source:UniProtKB/Swiss-Prot;Acc:P31695]	D/E	966	TRUE
	ss159821804	17	34719858	T/C	T	C	C		ENSMUSG00000015468	ENSMUST00000015612	Notch4	NON_SYNONYMOUS_CODING	0.622	benign	0.419	Neurogenic locus notch homolog protein 4 Precursor (Notch 4) [Contains Transforming protein Int-3;Notch 4 extracellular truncation;Notch 4 intracellular domain] [Source:UniProtKB/Swiss-Prot;Acc:P31695]	L/P	1245	TRUE
	Sudbery et al 2009	17	34721362	T/C	T	C	C	C	ENSMUST00000015612	ENSMUSG00000015468	Notch4-001	NON_SYNONYMOUS_CODING	<0.1	benign	0.082	Notch gene homolog 4 (Drosophila) Gene [Source:MGI (curated);Acc:Notch4-001]	S/P		TRUE
	rs33223511	17	34721362	T/C	T	C			ENSMUSG00000015468	ENSMUST00000015612	Notch4	NON_SYNONYMOUS_CODING	<0.1	benign	0.082	Neurogenic locus notch homolog protein 4 Precursor (Notch 4) [Contains Transforming protein Int-3;Notch 4 extracellular truncation;Notch 4 intracellular domain] [Source:UniProtKB/Swiss-Prot;Acc:P31695]	S/P	1437	TRUE
	rs51795773	17	34724062	G/A	G	G	G	G	ENSMUSG00000015468	ENSMUST00000015612	Notch4	NON_SYNONYMOUS_CODING,SPLICE_SITE	0.866	probably damaging	-0.785	Neurogenic locus notch homolog protein 4 Precursor (Notch 4) [Contains Transforming protein Int-3;Notch 4 extracellular truncation;Notch 4 intracellular domain] [Source:UniProtKB/Swiss-Prot;Acc:P31695]	G/E	1729	FALSE
	Sudbery et al 2009	17	34724653	A/G	A	G		G	ENSMUST00000015612	ENSMUSG00000015468	Notch4-001	NON_SYNONYMOUS_CODING	<0.1			Notch gene homolog 4 (Drosophila) Gene [Source:MGI (curated);Acc:Notch4-001]	Y/C		TRUE
	rs51120781	17	34727180	G/C	G	G	G	G	ENSMUSG00000034786	ENSMUST00000038244	Gpsm3	NON_SYNONYMOUS_CODING	1	possibly damaging	-0.303	G-protein-signaling modulator 3 [Source:UniProtKB/Swiss-Prot;Acc:Q3U1Z5]	R/T	5	FALSE
	rs47504953	17	34727194	G/T	G	G	G	G	ENSMUSG00000034786	ENSMUST00000038244	Gpsm3	NON_SYNONYMOUS_CODING	0.998	possibly damaging	-0.688	G-protein-signaling modulator 3 [Source:UniProtKB/Swiss-Prot;Acc:Q3U1Z5]	D/Y	10	FALSE
	ss159821814	17	34735125	G/A	G	A		A	ENSMUSG00000015452	ENSMUST00000015596	Ager	NON_SYNONYMOUS_CODING	0.963	probably damaging	2.031	Advanced glycosylation end product-specific receptor Precursor (Receptor for advanced glycosylation end products) [Source:UniProtKB/Swiss-Prot;Acc:Q62151]	G/E	31	TRUE
	ss159821815	17	34740271	A/G	A	G		G	ENSMUSG00000015478	ENSMUST00000015622		SPLICE_SITE,INTRONIC	0.453						TRUE
	ss159829520	17	34782221	T/C	T			C	ENSMUSG00000033739	ENSMUST00000036720	Fkbpl	NON_SYNONYMOUS_CODING	<0.1	benign	1.231	FK506-binding protein-like (WAF-1/CIP1 stabilizing protein 39)(WISp39) [Source:UniProtKB/Swiss-Prot;Acc:O35450]	I/T	6	TRUE
	Sudbery et al 2009	17	34784681	C/T	C		T		ENSMUST00000015605	ENSMUSG00000015461	MGI105121	SYNONYMOUS_CODING	1			cAMP responsive element binding protein-like 1 Gene [Source:MGI Symbol;Acc:MGI:105121]	0		TRUE
	rs29522502	17	34787670	G/T	G	G			ENSMUSG00000015461	ENSMUST00000015605	Atf6b	NON_SYNONYMOUS_CODING	0.727	benign	0.147	Cyclic AMP-dependent transcription factor ATF-6 beta (cAMP-dependent transcription factor ATF-6 beta)(Activating transcription factor 6 beta)(ATF6-beta)(cAMP-responsive element-binding protein-like 1)(cAMP response element-binding protein-related protein)	A/S	233	FALSE
	rs33887005	17	34808447	A/G	A	A	A		ENSMUSG00000033327	ENSMUST00000055067	Tnxb	NON_SYNONYMOUS_CODING	0.849	possibly damaging	0.093	tenascin XB [Source:RefSeq peptide;Acc:NP_112453]	Q/R	273	FALSE
	Sudbery et al 2009	17	34809014	A/G	A	G	G	G	ENSMUST00000087399	ENSMUSG00000033327	MGI1932137	NON_SYNONYMOUS_CODING	0.606	possibly damaging	1.558	tenascin XB Gene [Source:MGI Symbol;Acc:MGI:1932137]	N/S		TRUE
	rs47461796	17	34809014	A/G	A	G		G	ENSMUSG00000033327	ENSMUST00000055067	Tnxb	NON_SYNONYMOUS_CODING	0.606	possibly damaging	1.558	tenascin XB [Source:RefSeq peptide;Acc:NP_112453]	N/S	462	TRUE
	Sudbery et al 2009	17	34809045	T/C	T	C	C		ENSMUST00000087399	ENSMUSG00000033327	MGI1932137	SYNONYMOUS_CODING	0.915			tenascin XB Gene [Source:MGI Symbol;Acc:MGI:1932137]	P		TRUE
	Sudbery et al 2009	17	34809333	G/T	G	T			ENSMUST00000087399	ENSMUSG00000033327	MGI1932137	SYNONYMOUS_CODING	0.947			tenascin XB Gene [Source:MGI Symbol;Acc:MGI:1932137]	S		TRUE
	ss159821879	17	34809467	G/A	G	A	A	A	ENSMUSG00000033327	ENSMUST00000055067	Tnxb	NON_SYNONYMOUS_CODING	<0.1	benign	0.663	tenascin XB [Source:RefSeq peptide;Acc:NP_112453]	R/H	613	TRUE
	Sudbery et al 2009	17	34819051	A/C	A	C			ENSMUST00000087399	ENSMUSG00000033327	MGI1932137	NON_SYNONYMOUS_CODING	0.883	possibly damaging	1.568	tenascin XB Gene [Source:MGI Symbol;Acc:MGI:1932137]	S/R		TRUE
	rs33887584	17	34819051	A/C	A	C		C	ENSMUSG00000033327	ENSMUST00000055067	Tnxb	NON_SYNONYMOUS_CODING	0.883	benign	0.497	tenascin XB [Source:RefSeq peptide;Acc:NP_112453]	S/R	965	TRUE
	ss159821899	17	34820477	A/G	A	G	G	G	ENSMUSG00000033327	ENSMUST00000055067	Tnxb	NON_SYNONYMOUS_CODING	0.501	benign	0.133	tenascin XB [Source:RefSeq peptide;Acc:NP_112453]	I/V	1120	TRUE
	rs6171147	17	34822115	A/G	A	A	A	A	ENSMUSG00000033327	ENSMUST00000055067	Tnxb	NON_SYNONYMOUS_CODING	0.989	benign	-0.134	tenascin XB [Source:RefSeq peptide;Acc:NP_112453]	N/S	1218	FALSE
	Sudbery et al 2009	17	34832855	T/C	T			C	ENSMUST00000087399	ENSMUSG00000033327	MGI1932137	SYNONYMOUS_CODING	<0.1			tenascin XB Gene [Source:MGI Symbol;Acc:MGI:1932137]	P		TRUE
	ENSMUSSNP6116117	17	34833521	C/T	C				ENSMUSG00000033327	ENSMUST00000055067	Tnxb	NON_SYNONYMOUS_CODING	0.502	benign	1.259	tenascin XB [Source:RefSeq peptide;Acc:NP_112453]	T/I	2167	TRUE
	rs52003119	17	34833715	G/A	G	A		G	ENSMUSG00000033327	ENSMUST00000055067	Tnxb	NON_SYNONYMOUS_CODING	0.716	benign	-0.167	tenascin XB [Source:RefSeq peptide;Acc:NP_112453]	D/N	2232	FALSE
	rs33422550	17	34840315	C/T	C	T		C	ENSMUSG00000033327	ENSMUST00000055067	Tnxb	NON_SYNONYMOUS_CODING	<0.1	probably damaging	-0.521	tenascin XB [Source:RefSeq peptide;Acc:NP_112453]	P/S	2494	FALSE
	rs33422550	17	34840315	C/T	C	T		C	ENSMUSG00000033327	ENSMUST00000087399	Tnxb	NON_SYNONYMOUS_CODING	<0.1	possibly damaging	-0.475	tenascin XB [Source:RefSeq peptide;Acc:NP_112453]	P/S	2386	FALSE
	Sudbery et al 2009	17	34846463	C/G	C			G	ENSMUST00000087399	ENSMUSG00000033327	MGI1932137	NON_SYNONYMOUS_CODING	0.254	benign	0.469	tenascin XB Gene [Source:MGI Symbol;Acc:MGI:1932137]	H/Q		TRUE
	Sudbery et al 2009	17	34847767	T/C	T			C	ENSMUST00000087399	ENSMUSG00000033327	MGI1932137	SYNONYMOUS_CODING	0.983			tenascin XB Gene [Source:MGI Symbol;Acc:MGI:1932137]	S		TRUE
	Sudbery et al 2009	17	34847773	A/G	A			G	ENSMUST00000087399	ENSMUSG00000033327	MGI1932137	SYNONYMOUS_CODING	0.416			tenascin XB Gene [Source:MGI Symbol;Acc:MGI:1932137]	T		TRUE
	rs49259831	17	34851693	T/A	T	T	T	T	ENSMUSG00000033327	ENSMUST00000055067	Tnxb	NON_SYNONYMOUS_CODING	0.733	benign	-0.065	tenascin XB [Source:RefSeq peptide;Acc:NP_112453]	L/M	3369	FALSE
	rs49259831	17	34851693	T/A	T	T	T	T	ENSMUSG00000033327	ENSMUST00000087399	Tnxb	NON_SYNONYMOUS_CODING	0.733	benign	-0.065	tenascin XB [Source:RefSeq peptide;Acc:NP_112453]	L/M	3261	FALSE
	rs49113778	17	34851709	G/A	G	G	G	G	ENSMUSG00000033327	ENSMUST00000087399	Tnxb	NON_SYNONYMOUS_CODING	<0.1	possibly damaging	-0.071	tenascin XB [Source:RefSeq peptide;Acc:NP_112453]	R/Q	3266	FALSE
	rs49113778	17	34851709	G/A	G	G	G	G	ENSMUSG00000033327	ENSMUST00000055067	Tnxb	NON_SYNONYMOUS_CODING	<0.1	possibly damaging	-0.278	tenascin XB [Source:RefSeq peptide;Acc:NP_112453]	R/Q	3374	FALSE
	rs46170682	17	34851777	G/C	G	G	G	G	ENSMUSG00000033327	ENSMUST00000055067	Tnxb	NON_SYNONYMOUS_CODING	<0.1	benign	0.799	tenascin XB [Source:RefSeq peptide;Acc:NP_112453]	G/R	3397	FALSE
	rs46170682	17	34851777	G/C	G	G	G	G	ENSMUSG00000033327	ENSMUST00000087399	Tnxb	NON_SYNONYMOUS_CODING	<0.1	benign	0.675	tenascin XB [Source:RefSeq peptide;Acc:NP_112453]	G/R	3289	FALSE
	Sudbery et al 2009	17	34852725	G/A	G			A	ENSMUST00000087399	ENSMUSG00000033327	MGI1932137	SYNONYMOUS_CODING	0.968			tenascin XB Gene [Source:MGI Symbol;Acc:MGI:1932137]	L		TRUE
	rs46777670	17	34852795	G/C		G	G	G	ENSMUSG00000033327	ENSMUST00000055067	Tnxb	NON_SYNONYMOUS_CODING	0.929	benign	0.71	tenascin XB [Source:RefSeq peptide;Acc:NP_112453]	E/Q	3466	TRUE
	rs46777670	17	34852795	G/C		G	G	G	ENSMUSG00000033327	ENSMUST00000087399	Tnxb	NON_SYNONYMOUS_CODING	0.929	benign	0.469	tenascin XB [Source:RefSeq peptide;Acc:NP_112453]	E/Q	3358	TRUE
	rs8253666	17	34856005	C/T		G	G	G	ENSMUSG00000033327	ENSMUST00000055067	Tnxb	ESSENTIAL_SPLICE_SITE,INTRONIC	0.997						TRUE
	rs8253664	17	34856012	G/A		C	C	C	ENSMUSG00000033327	ENSMUST00000055067	Tnxb	NON_SYNONYMOUS_CODING	1	probably damaging	1.773	tenascin XB [Source:RefSeq peptide;Acc:NP_112453]	S/F	4029	TRUE
	rs8253664	17	34856012	G/A		C	C	C	ENSMUSG00000033327	ENSMUST00000087399	Tnxb	NON_SYNONYMOUS_CODING	1	probably damaging	1.773	tenascin XB [Source:RefSeq peptide;Acc:NP_112453]	S/F	3921	TRUE
	rs48292598	17	34865792	C/T		C	C	C	ENSMUSG00000073418	ENSMUST00000069507	C4a	NON_SYNONYMOUS_CODING	0.999	benign	0.91	Complement C4-B Precursor [Contains Complement C4 beta chain;Complement C4 alpha chain;C4a anaphylatoxin;Complement C4 gamma chain] [Source:UniProtKB/Swiss-Prot;Acc:P01029]	A/T	1665	TRUE
	rs51917632	17	34866163	G/A		G	G	G	ENSMUSG00000073418	ENSMUST00000069507	C4a	NON_SYNONYMOUS_CODING	1	benign	1.395	Complement C4-B Precursor [Contains Complement C4 beta chain;Complement C4 alpha chain;C4a anaphylatoxin;Complement C4 gamma chain] [Source:UniProtKB/Swiss-Prot;Acc:P01029]	L/F	1636	TRUE
	rs13475143	17	34866356	C/T	C	C			ENSMUSG00000073418	ENSMUST00000069507	C4a	NON_SYNONYMOUS_CODING	0.984	possibly damaging	-0.531	Complement C4-B Precursor [Contains Complement C4 beta chain;Complement C4 alpha chain;C4a anaphylatoxin;Complement C4 gamma chain] [Source:UniProtKB/Swiss-Prot;Acc:P01029]	R/Q	1616	FALSE
	ss159821929	17	34867829	C/T	C	T			ENSMUSG00000073418	ENSMUST00000069507	C4a	NON_SYNONYMOUS_CODING	0.978	benign	0.654	Complement C4-B Precursor [Contains Complement C4 beta chain;Complement C4 alpha chain;C4a anaphylatoxin;Complement C4 gamma chain] [Source:UniProtKB/Swiss-Prot;Acc:P01029]	R/K	1442	TRUE
	rs46195770	17	34869946	C/T	C	C		C	ENSMUSG00000073418	ENSMUST00000069507	C4a	NON_SYNONYMOUS_CODING	0.878	benign	1.572	Complement C4-B Precursor [Contains Complement C4 beta chain;Complement C4 alpha chain;C4a anaphylatoxin;Complement C4 gamma chain] [Source:UniProtKB/Swiss-Prot;Acc:P01029]	S/N	1290	FALSE
	rs46493572	17	34871121	A/T	A	A		A	ENSMUSG00000073418	ENSMUST00000069507	C4a	NON_SYNONYMOUS_CODING	<0.1	benign	0.142	Complement C4-B Precursor [Contains Complement C4 beta chain;Complement C4 alpha chain;C4a anaphylatoxin;Complement C4 gamma chain] [Source:UniProtKB/Swiss-Prot;Acc:P01029]	N/K	1058	FALSE
	rs49270807	17	34871326	C/G	C	C	C	C	ENSMUSG00000073418	ENSMUST00000069507	C4a	NON_SYNONYMOUS_CODING	1	possibly damaging	-0.575	Complement C4-B Precursor [Contains Complement C4 beta chain;Complement C4 alpha chain;C4a anaphylatoxin;Complement C4 gamma chain] [Source:UniProtKB/Swiss-Prot;Acc:P01029]	D/H	1043	FALSE
	rs49068908	17	34871371	C/T	C	C	C	C	ENSMUSG00000073418	ENSMUST00000069507	C4a	NON_SYNONYMOUS_CODING	0.987	benign	-0.271	Complement C4-B Precursor [Contains Complement C4 beta chain;Complement C4 alpha chain;C4a anaphylatoxin;Complement C4 gamma chain] [Source:UniProtKB/Swiss-Prot;Acc:P01029]	E/K	1028	FALSE
	rs51895403	17	34873226	C/G	C			C	ENSMUSG00000073418	ENSMUST00000069507	C4a	NON_SYNONYMOUS_CODING	0.976	benign	-0.285	Complement C4-B Precursor [Contains Complement C4 beta chain;Complement C4 alpha chain;C4a anaphylatoxin;Complement C4 gamma chain] [Source:UniProtKB/Swiss-Prot;Acc:P01029]	E/D	778	FALSE
	rs48909345	17	34873262	A/C	A			A	ENSMUSG00000073418	ENSMUST00000069507	C4a	NON_SYNONYMOUS_CODING	0.366	benign	1.066	Complement C4-B Precursor [Contains Complement C4 beta chain;Complement C4 alpha chain;C4a anaphylatoxin;Complement C4 gamma chain] [Source:UniProtKB/Swiss-Prot;Acc:P01029]	D/E	766	FALSE
	rs47442526	17	34873852	C/G	C	C		C	ENSMUSG00000073418	ENSMUST00000069507	C4a	NON_SYNONYMOUS_CODING	<0.1	benign	0.294	Complement C4-B Precursor [Contains Complement C4 beta chain;Complement C4 alpha chain;C4a anaphylatoxin;Complement C4 gamma chain] [Source:UniProtKB/Swiss-Prot;Acc:P01029]	V/L	685	FALSE
	rs48619464	17	34873860	T/A	T	T	T	T	ENSMUSG00000073418	ENSMUST00000069507	C4a	NON_SYNONYMOUS_CODING	0.474	possibly damaging	0.179	Complement C4-B Precursor [Contains Complement C4 beta chain;Complement C4 alpha chain;C4a anaphylatoxin;Complement C4 gamma chain] [Source:UniProtKB/Swiss-Prot;Acc:P01029]	Q/L	682	FALSE
	rs13475137	17	34875840	A/G	A	G	G	G	ENSMUSG00000073418	ENSMUST00000069507	C4a	NON_SYNONYMOUS_CODING	0.931	benign	0.03	Complement C4-B Precursor [Contains Complement C4 beta chain;Complement C4 alpha chain;C4a anaphylatoxin;Complement C4 gamma chain] [Source:UniProtKB/Swiss-Prot;Acc:P01029]	M/T	604	TRUE
	rs48884725	17	34879334	C/T		C	C	C	ENSMUSG00000073418	ENSMUST00000069507	C4a	NON_SYNONYMOUS_CODING	0.657	benign	0.686	Complement C4-B Precursor [Contains Complement C4 beta chain;Complement C4 alpha chain;C4a anaphylatoxin;Complement C4 gamma chain] [Source:UniProtKB/Swiss-Prot;Acc:P01029]	A/T	199	TRUE
	ENSMUSSNP3574229	17	34879821	A/T	A	T			ENSMUSG00000073418	ENSMUST00000069507	C4a	NON_SYNONYMOUS_CODING	0.991	benign	0.191	Complement C4-B Precursor [Contains Complement C4 beta chain;Complement C4 alpha chain;C4a anaphylatoxin;Complement C4 gamma chain] [Source:UniProtKB/Swiss-Prot;Acc:P01029]	F/Y	132	TRUE
	rs50241026	17	34879821	A/T		T	T	A	ENSMUSG00000073418	ENSMUST00000069507	0	NON_SYNONYMOUS_CODING	0.991	0	0	0	F/Y	132	TRUE
	Sudbery et al 2009	17	34880546	C/T	C	T	T		ENSMUST00000069507	ENSMUSG00000073418	MGI88228	SYNONYMOUS_CODING	<0.1			complement component 4B (Childo blood group) Gene [Source:MGI Symbol;Acc:MGI:88228]	Q		TRUE
	rs45740831	17	34939735	C/T	C		C	C	ENSMUSG00000024365	ENSMUST00000025223	Cyp21a1	NON_SYNONYMOUS_CODING	<0.1	benign	-0.586	Steroid 21-hydroxylase (EC 1.14.99.10)(Cytochrome P450 21)(Cytochrome P450 XXI)(21-OHase)(P450-C21)(P-450c21) [Source:UniProtKB/Swiss-Prot;Acc:P03940]	E/K	268	FALSE
	rs47024915	17	34939764	C/T	C		C	C	ENSMUSG00000024365	ENSMUST00000025223	Cyp21a1	NON_SYNONYMOUS_CODING	<0.1	benign	0.381	Steroid 21-hydroxylase (EC 1.14.99.10)(Cytochrome P450 21)(Cytochrome P450 XXI)(21-OHase)(P450-C21)(P-450c21) [Source:UniProtKB/Swiss-Prot;Acc:P03940]	G/E	258	FALSE
	rs46096914	17	34939937	C/T	C		-	C	ENSMUSG00000024365	ENSMUST00000025223	Cyp21a1	NON_SYNONYMOUS_CODING	0.942	benign	1.145	Steroid 21-hydroxylase (EC 1.14.99.10)(Cytochrome P450 21)(Cytochrome P450 XXI)(21-OHase)(P450-C21)(P-450c21) [Source:UniProtKB/Swiss-Prot;Acc:P03940]	R/Q	238	FALSE
	rs51143116	17	34940013	G/A	G	G	G	G	ENSMUSG00000024365	ENSMUST00000025223	Cyp21a1	NON_SYNONYMOUS_CODING	0.985	possibly damaging	2.134	Steroid 21-hydroxylase (EC 1.14.99.10)(Cytochrome P450 21)(Cytochrome P450 XXI)(21-OHase)(P450-C21)(P-450c21) [Source:UniProtKB/Swiss-Prot;Acc:P03940]	L/F	213	FALSE
	rs50211432	17	34940199	G/A		G	G	G	ENSMUSG00000024365	ENSMUST00000025223	Cyp21a1	NON_SYNONYMOUS_CODING	<0.1	possibly damaging	1.6	Steroid 21-hydroxylase (EC 1.14.99.10)(Cytochrome P450 21)(Cytochrome P450 XXI)(21-OHase)(P450-C21)(P-450c21) [Source:UniProtKB/Swiss-Prot;Acc:P03940]	T/M	180	TRUE
	rs47025212	17	34940487	G/T	G	G	G	G	ENSMUSG00000024365	ENSMUST00000025223	0	SPLICE_SITE,INTRONIC	0.447	0	0	0			FALSE
	rs48709001	17	34940490	C/T	C	C	C	C	ENSMUSG00000024365	ENSMUST00000025223	0	SPLICE_SITE,INTRONIC	0.846	0	0	0			FALSE
	rs51707651	17	34940543	C/A	C	C	C	C	ENSMUSG00000024365	ENSMUST00000025223	Cyp21a1	NON_SYNONYMOUS_CODING	0.121	possibly damaging	-0.947	Steroid 21-hydroxylase (EC 1.14.99.10)(Cytochrome P450 21)(Cytochrome P450 XXI)(21-OHase)(P450-C21)(P-450c21) [Source:UniProtKB/Swiss-Prot;Acc:P03940]	R/L	129	FALSE
	rs48054490	17	34940566	G/C	G	G	G	G	ENSMUSG00000024365	ENSMUST00000114087	Cyp21a1	NON_SYNONYMOUS_CODING	0.992	benign	0	Steroid 21-hydroxylase (EC 1.14.99.10)(Cytochrome P450 21)(Cytochrome P450 XXI)(21-OHase)(P450-C21)(P-450c21) [Source:UniProtKB/Swiss-Prot;Acc:P03940]	L/V	90	FALSE
	rs8247242	17	34940596	G/T	G	T	T		ENSMUSG00000024365	ENSMUST00000114087	Cyp21a1	NON_SYNONYMOUS_CODING	0.161	benign	?	Steroid 21-hydroxylase (EC 1.14.99.10)(Cytochrome P450 21)(Cytochrome P450 XXI)(21-OHase)(P450-C21)(P-450c21) [Source:UniProtKB/Swiss-Prot;Acc:P03940]	H/N	80	TRUE
	ENSMUSSNP1269395	17	34946503	T/C	T	C			ENSMUSG00000015451	ENSMUST00000015595	C4a	NON_SYNONYMOUS_CODING	0.731	benign	0.042	sex-limited protein [Source:RefSeq peptide;Acc:NP_035543]	T/A	1661	TRUE
	rs48292598	17	34946503	T/C		C	C		ENSMUSG00000015451	ENSMUST00000015595	0	NON_SYNONYMOUS_CODING	0.731	0	0	0	T/A	1661	FALSE
	ENSMUSSNP4513593	17	34946874	A/G	A				ENSMUSG00000015451	ENSMUST00000015595	C4a	NON_SYNONYMOUS_CODING	0.993	benign	1.31	sex-limited protein [Source:RefSeq peptide;Acc:NP_035543]	F/L	1632	TRUE
	rs51917632	17	34946874	A/G			G	G	ENSMUSG00000015451	ENSMUST00000015595	0	NON_SYNONYMOUS_CODING	0.993	0	0	0	F/L	1632	FALSE
	Sudbery et al 2009	17	34947470	C/T	C			T	ENSMUST00000015595	ENSMUSG00000015451	MGI98320	NON_SYNONYMOUS_CODING	0.282	possibly damaging	1.96	complement component 4A (Rodgers blood group) Gene [Source:MGI Symbol;Acc:MGI:98320]	A/T		TRUE
	Sudbery et al 2009	17	34950384	A/C	A	C	C		ENSMUST00000015595	ENSMUSG00000015451	MGI98320	NON_SYNONYMOUS_CODING	<0.1	benign	0.283	complement component 4A (Rodgers blood group) Gene [Source:MGI Symbol;Acc:MGI:98320]	V/G		TRUE
	rs47951027	17	34950384	A/C	A	C		A	ENSMUSG00000015451	ENSMUST00000015595	C4a	NON_SYNONYMOUS_CODING	<0.1	benign	-0.008	sex-limited protein [Source:RefSeq peptide;Acc:NP_035543]	V/G	1335	FALSE
	Sudbery et al 2009	17	34950392	T/C	T	C	C		ENSMUST00000015595	ENSMUSG00000015451	MGI98320	SYNONYMOUS_CODING	<0.1			complement component 4A (Rodgers blood group) Gene [Source:MGI Symbol;Acc:MGI:98320]	K		TRUE
	Sudbery et al 2009	17	34950395	G/A	G	A	A		ENSMUST00000015595	ENSMUSG00000015451	MGI98320	SYNONYMOUS_CODING	<0.1			complement component 4A (Rodgers blood group) Gene [Source:MGI Symbol;Acc:MGI:98320]	L		TRUE
	Sudbery et al 2009	17	34950428	C/G	C	G			ENSMUST00000015595	ENSMUSG00000015451	MGI98320	NON_SYNONYMOUS_CODING	0.759	possibly damaging	1.675	complement component 4A (Rodgers blood group) Gene [Source:MGI Symbol;Acc:MGI:98320]	K/N		TRUE
	rs49975925	17	34950428	C/G	C	G			ENSMUSG00000015451	ENSMUST00000015595	C4a	NON_SYNONYMOUS_CODING	0.759	possibly damaging	1.675	sex-limited protein [Source:RefSeq peptide;Acc:NP_035543]	K/N	1320	TRUE
	rs48623722	17	34950768	C/T	C	T		C	ENSMUSG00000015451	ENSMUST00000015595	C4a	NON_SYNONYMOUS_CODING	<0.1	benign	-0.468	sex-limited protein [Source:RefSeq peptide;Acc:NP_035543]	V/M	1233	FALSE
	Sudbery et al 2009	17	34951301	C/T	C			T	ENSMUST00000015595	ENSMUSG00000015451	MGI98320	NON_SYNONYMOUS_CODING	0.288	benign	0.404	complement component 4A (Rodgers blood group) Gene [Source:MGI Symbol;Acc:MGI:98320]	R/Q		TRUE
	Sudbery et al 2009	17	34951363	A/G	A			G	ENSMUST00000015595	ENSMUSG00000015451	MGI98320	SYNONYMOUS_CODING	0.331			complement component 4A (Rodgers blood group) Gene [Source:MGI Symbol;Acc:MGI:98320]	N		TRUE
	rs8247256	17	34952100	T/C	T	T	T	T	ENSMUSG00000015451	ENSMUST00000015595	C4a	NON_SYNONYMOUS_CODING,SPLICE_SITE	0.413	possibly damaging	1.286	sex-limited protein [Source:RefSeq peptide;Acc:NP_035543]	S/G	1001	FALSE
	Sudbery et al 2009	17	34952146	T/C	T		C		ENSMUST00000015595	ENSMUSG00000015451	MGI98320	NON_SYNONYMOUS_CODING	0.916	benign	1.334	complement component 4A (Rodgers blood group) Gene [Source:MGI Symbol;Acc:MGI:98320]	E/G		TRUE
	ss159821961	17	34952146	T/C	T	C		C	ENSMUSG00000015451	ENSMUST00000015595	C4a	NON_SYNONYMOUS_CODING	0.916	benign	1.334	sex-limited protein [Source:RefSeq peptide;Acc:NP_035543]	E/G	986	TRUE
	rs8247273	17	34953341	T/A	T	T	T	T	ENSMUSG00000015451	ENSMUST00000015595	C4a	NON_SYNONYMOUS_CODING	<0.1	benign	0.949	sex-limited protein [Source:RefSeq peptide;Acc:NP_035543]	K/M	858	FALSE
	Sudbery et al 2009	17	34953882	C/G	C		G		ENSMUST00000015595	ENSMUSG00000015451	MGI98320	NON_SYNONYMOUS_CODING	0.995	benign	1.379	complement component 4A (Rodgers blood group) Gene [Source:MGI Symbol;Acc:MGI:98320]	E/D		TRUE
	ENSMUSSNP5216451	17	34953882	C/G	C	G		C	ENSMUSG00000015451	ENSMUST00000015595	C4a	NON_SYNONYMOUS_CODING	0.995	benign	-0.378	sex-limited protein [Source:RefSeq peptide;Acc:NP_035543]	E/D	775	FALSE
	ENSMUSSNP1348527	17	34954050	G/T	G	T			ENSMUSG00000015451	ENSMUST00000015595	C4a	NON_SYNONYMOUS_CODING	<0.1	possibly damaging	1.733	sex-limited protein [Source:RefSeq peptide;Acc:NP_035543]	P/H	750	TRUE
	rs29534851	17	34954872	C/G	C	G			ENSMUSG00000015451	ENSMUST00000015595	C4a	NON_SYNONYMOUS_CODING	0.606	benign	0.911	sex-limited protein [Source:RefSeq peptide;Acc:NP_035543]	V/L	631	TRUE
	ENSMUSSNP3265858	17	34954884	T/C	T				ENSMUSG00000015451	ENSMUST00000015595	C4a	NON_SYNONYMOUS_CODING	0.946	possibly damaging	1.83	sex-limited protein [Source:RefSeq peptide;Acc:NP_035543]	N/D	627	TRUE
	Sudbery et al 2009	17	34955422	C/T	C			T	ENSMUST00000015595	ENSMUSG00000015451	MGI98320	NON_SYNONYMOUS_CODING	<0.1	benign	0.786	complement component 4A (Rodgers blood group) Gene [Source:MGI Symbol;Acc:MGI:98320]	R/Q		TRUE
	ENSMUSSNP2708120	17	34955422	C/T	C	T			ENSMUSG00000015451	ENSMUST00000015595	C4a	NON_SYNONYMOUS_CODING	<0.1	benign	0.786	sex-limited protein [Source:RefSeq peptide;Acc:NP_035543]	R/Q	588	TRUE
	Sudbery et al 2009	17	34955446	T/C	T			C	ENSMUST00000015595	ENSMUSG00000015451	MGI98320	NON_SYNONYMOUS_CODING	<0.1	benign	0.182	complement component 4A (Rodgers blood group) Gene [Source:MGI Symbol;Acc:MGI:98320]	H/R		TRUE
	Sudbery et al 2009	17	34956276	G/T	G			T	ENSMUST00000015595	ENSMUSG00000015451	MGI98320	SYNONYMOUS_CODING	0.167			complement component 4A (Rodgers blood group) Gene [Source:MGI Symbol;Acc:MGI:98320]	R		TRUE
	Sudbery et al 2009	17	34956277	A/T	A			T	ENSMUST00000015595	ENSMUSG00000015451	MGI98320	NON_SYNONYMOUS_CODING	0.124			complement component 4A (Rodgers blood group) Gene [Source:MGI Symbol;Acc:MGI:98320]	S/R		TRUE
	rs29538739	17	34956564	A/G	A	G	G	G	ENSMUSG00000015451	ENSMUST00000015595	C4a	NON_SYNONYMOUS_CODING	<0.1	possibly damaging	1.751	sex-limited protein [Source:RefSeq peptide;Acc:NP_035543]	M/T	453	TRUE
	ss159821962	17	34956744	C/T	C	T	T	T	ENSMUSG00000015451	ENSMUST00000015595	C4a	NON_SYNONYMOUS_CODING	<0.1	benign	1.339	sex-limited protein [Source:RefSeq peptide;Acc:NP_035543]	G/E	440	TRUE
	ss159821963	17	34956850	G/C	G	C	C	C	ENSMUSG00000015451	ENSMUST00000015595	C4a	NON_SYNONYMOUS_CODING	0.418	benign	1.276	sex-limited protein [Source:RefSeq peptide;Acc:NP_035543]	P/A	405	TRUE
	rs33339277	17	34957697	C/T	C	T			ENSMUSG00000015451	ENSMUST00000015595	C4a	NON_SYNONYMOUS_CODING	0.886	benign	0.71	sex-limited protein [Source:RefSeq peptide;Acc:NP_035543]	R/Q	295	TRUE
	ENSMUSSNP1465090	17	34958912	T/C	T	C			ENSMUSG00000015451	ENSMUST00000015595	C4a	NON_SYNONYMOUS_CODING	<0.1	benign	0.685	sex-limited protein [Source:RefSeq peptide;Acc:NP_035543]	T/A	199	TRUE
	rs48884725	17	34958912	T/C		C	C	C	ENSMUSG00000015451	ENSMUST00000015595	0	NON_SYNONYMOUS_CODING	<0.1	0	0	0	T/A	199	TRUE
	Sudbery et al 2009	17	34958912	T/C	T	C	C		ENSMUST00000015595	ENSMUSG00000015451	MGI98320	NON_SYNONYMOUS_CODING	<0.1			complement component 4A (Rodgers blood group) Gene [Source:MGI Symbol;Acc:MGI:98320]	T/A		TRUE
	ENSMUSSNP1814680	17	34958919	T/G	T	G			ENSMUSG00000015451	ENSMUST00000015595	C4a	NON_SYNONYMOUS_CODING	0.9	benign	0.381	sex-limited protein [Source:RefSeq peptide;Acc:NP_035543]	L/F	196	TRUE
	Sudbery et al 2009	17	34958919	T/G	T	G	G		ENSMUST00000015595	ENSMUSG00000015451	MGI98320	NON_SYNONYMOUS_CODING	0.9			complement component 4A (Rodgers blood group) Gene [Source:MGI Symbol;Acc:MGI:98320]	L/F		TRUE
	rs50241026	17	34959399	T/A		T	T	A	ENSMUSG00000015451	ENSMUST00000015595	C4a	NON_SYNONYMOUS_CODING	0.86	benign	0.191	sex-limited protein [Source:RefSeq peptide;Acc:NP_035543]	Y/F	132	TRUE
	ENSMUSSNP4882164	17	34960024	G/A	G	A			ENSMUSG00000015451	ENSMUST00000015595	C4a	NON_SYNONYMOUS_CODING	<0.1	possibly damaging	1.662	sex-limited protein [Source:RefSeq peptide;Acc:NP_035543]	S/L	76	TRUE
	Sudbery et al 2009	17	34960137	T/C	T			C	ENSMUST00000015595	ENSMUSG00000015451	MGI98320	SYNONYMOUS_CODING	0.956			complement component 4A (Rodgers blood group) Gene [Source:MGI Symbol;Acc:MGI:98320]	S		TRUE
	Sudbery et al 2009	17	34960146	A/G	A			G	ENSMUST00000015595	ENSMUSG00000015451	MGI98320	SYNONYMOUS_CODING	0.756			complement component 4A (Rodgers blood group) Gene [Source:MGI Symbol;Acc:MGI:98320]	T		TRUE
	Sudbery et al 2009	17	34961553	A/G	A			G	ENSMUST00000077477	ENSMUSG00000061207	MGI1860085	SYNONYMOUS_CODING	0.859			serine/threonine kinase 19 Gene [Source:MGI Symbol;Acc:MGI:1860085]	0		TRUE
	rs47426748	17	34961565	G/A	G	G	G	G	ENSMUSG00000061207	ENSMUST00000077477	Stk19	NON_SYNONYMOUS_CODING	0.99	probably damaging	-0.932	Serine/threonine-protein kinase 19 (RP1 protein)(EC 2.7.11.1) [Source:UniProtKB/Swiss-Prot;Acc:Q9JHN8]	R/W	205	FALSE
	ss159821982	17	34974401	C/A	C	A	A		ENSMUSG00000040482	ENSMUST00000046244	Dom3z	NON_SYNONYMOUS_CODING	0.623	benign	1.374	Protein Dom3Z (Dom-3 homolog Z) [Source:UniProtKB/Swiss-Prot;Acc:O70348]	H/N	20	TRUE
	ss159821983	17	34974426	T/C	T	C			ENSMUSG00000040482	ENSMUST00000046244	Dom3z	NON_SYNONYMOUS_CODING	<0.1	possibly damaging	1.998	Protein Dom3Z (Dom-3 homolog Z) [Source:UniProtKB/Swiss-Prot;Acc:O70348]	L/S	28	TRUE
	rs13473420	17	34974576	C/T	C	C		C	ENSMUSG00000040482	ENSMUST00000046244	Dom3z	NON_SYNONYMOUS_CODING	0.969	benign	-0.881	Protein Dom3Z (Dom-3 homolog Z) [Source:UniProtKB/Swiss-Prot;Acc:O70348]	P/L	78	FALSE
	Sudbery et al 2009	17	34976972	A/G	A	G	G		ENSMUST00000046022	ENSMUSG00000040356	MGI1099835	SYNONYMOUS_CODING	0.46			superkiller viralicidic activity 2-like (S. cerevisiae) Gene [Source:MGI Symbol;Acc:MGI:1099835]	0		TRUE
	rs49558752	17	34981753	G/A	G	G	G	A	ENSMUSG00000040356	ENSMUST00000046022	Skiv2l	NON_SYNONYMOUS_CODING	1	benign	-1.048	superkiller viralicidic activity 2-like [Source:RefSeq peptide;Acc:NP_067312]	S/F	553	FALSE
	Sudbery et al 2009	17	34982021	C/T	C	T	T		ENSMUST00000046022	ENSMUSG00000040356	MGI1099835	SYNONYMOUS_CODING	1			superkiller viralicidic activity 2-like (S. cerevisiae) Gene [Source:MGI Symbol;Acc:MGI:1099835]	K		TRUE
	rs13462562	17	34993993	C/G	C	C	C	C	ENSMUSG00000024371	ENSMUST00000025229	Cfb	NON_SYNONYMOUS_CODING	0.948	probably damaging	-0.599	Complement factor B Precursor (EC 3.4.21.47)(C3/C5 convertase) [Contains Complement factor B Ba fragment;Complement factor B Bb fragment] [Source:UniProtKB/Swiss-Prot;Acc:P04186]	C/S	679	FALSE
	Sudbery et al 2009	17	35160579	G/A	G		A		ENSMUST00000007245	ENSMUSG00000007030	Q9JHA8	SYNONYMOUS_CODING	0.994			Protein G7c Precursor [Source:UniProtKB/Swiss-Prot;Acc:Q9JHA8]	E		TRUE
	Sudbery et al 2009	17	35162115	T/C	T			C	ENSMUST00000007245	ENSMUSG00000007030	Q9JHA8	SYNONYMOUS_CODING	<0.1			Protein G7c Precursor [Source:UniProtKB/Swiss-Prot;Acc:Q9JHA8]	P		TRUE
	Sudbery et al 2009	17	35247613	T/C	T		C	C	ENSMUST00000037849	ENSMUSG00000034482	MGI2148974	SYNONYMOUS_CODING	<0.1			lymphocyte antigen 6 complex, locus G5C Gene [Source:MGI Symbol;Acc:MGI:2148974]	G		TRUE
	Sudbery et al 2009	17	35254805	G/A	G	A			ENSMUST00000025246	ENSMUSG00000024387	MGI88548	SYNONYMOUS_CODING	1			casein kinase 2, beta polypeptide Gene [Source:MGI Symbol;Acc:MGI:88548]	0		TRUE
	Sudbery et al 2009	17	35268246	A/G	A			G	ENSMUST00000025249	ENSMUSG00000024391	MGI1930124	NON_SYNONYMOUS_CODING	1			apolipoprotein M Gene [Source:MGI Symbol;Acc:MGI:1930124]	0		TRUE
	Sudbery et al 2009	17	35295953	C/T	C		T		ENSMUST00000025253	ENSMUSG00000024393	MGI1915467	NON_SYNONYMOUS_CODING	0.972			HLA-B associated transcript 2 Gene [Source:MGI Symbol;Acc:MGI:1915467]	V/I		TRUE
	Sudbery et al 2009	17	35323972	T/A	T	A			ENSMUST00000097336	ENSMUSG00000073412	MGI1096324	ESSENTIAL_SPLICE_SITE	<0.1			leukocyte specific transcript 1 Gene [Source:MGI Symbol;Acc:MGI:1096324]	N/Y		TRUE
	Sudbery et al 2009	17	35323973	T/G	T	G			ENSMUST00000097336	ENSMUSG00000073412	MGI1096324	ESSENTIAL_SPLICE_SITE	<0.1			leukocyte specific transcript 1 Gene [Source:MGI Symbol;Acc:MGI:1096324]	L		TRUE
	Sudbery et al 2009	17	35332104	G/C	G			C	ENSMUST00000025262	ENSMUSG00000024399	MGI104796	NON_SYNONYMOUS_CODING	<0.1			lymphotoxin B Gene [Source:MGI Symbol;Acc:MGI:104796]	R/P		TRUE
	Sudbery et al 2009	17	35332122	C/T	C	T	T		ENSMUST00000025262	ENSMUSG00000024399	MGI104796	NON_SYNONYMOUS_CODING	<0.1			lymphotoxin B Gene [Source:MGI Symbol;Acc:MGI:104796]	S/F		TRUE
	Sudbery et al 2009	17	35332124	A/T	A	T	T		ENSMUST00000025262	ENSMUSG00000024399	MGI104796	NON_SYNONYMOUS_CODING	<0.1			lymphotoxin B Gene [Source:MGI Symbol;Acc:MGI:104796]	N/Y		TRUE
	Sudbery et al 2009	17	35374135	A/G	A		G		ENSMUST00000118384	ENSMUSG00000024403	Atp6v1g2-001	SYNONYMOUS_CODING	0.423			ATPase, H+ transporting, lysosomal V1 subunit G2 Gene [Source:MGI (curated);Acc:Atp6v1g2-001]	0		TRUE
	Sudbery et al 2009	17	35400354	C/T	C			T	ENSMUST00000078966	ENSMUSG00000073411	MGI95931	NON_SYNONYMOUS_CODING	<0.1	benign	0.681	histocompatibility 2, Q region locus 2 Gene [Source:MGI Symbol;Acc:MGI:95931]	A/V		TRUE
	Sudbery et al 2009	17	35400375	A/G	A	G	G	G	ENSMUST00000078966	ENSMUSG00000073411	MGI95931	NON_SYNONYMOUS_CODING	<0.1	benign	1.072	histocompatibility 2, Q region locus 2 Gene [Source:MGI Symbol;Acc:MGI:95931]	E/G		TRUE
	Sudbery et al 2009	17	35400389	A/G	A			G	ENSMUST00000078966	ENSMUSG00000073411	MGI95931	NON_SYNONYMOUS_CODING	<0.1	benign	0.978	histocompatibility 2, Q region locus 2 Gene [Source:MGI Symbol;Acc:MGI:95931]	I/V		TRUE
	Sudbery et al 2009	17	35400403	T/C	T			C	ENSMUST00000078966	ENSMUSG00000073411	MGI95931	SYNONYMOUS_CODING	0.981			histocompatibility 2, Q region locus 2 Gene [Source:MGI Symbol;Acc:MGI:95931]	Y		TRUE
	Sudbery et al 2009	17	35400414	A/C	A			C	ENSMUST00000078966	ENSMUSG00000073411	MGI95931	NON_SYNONYMOUS_CODING	1	benign	1.176	histocompatibility 2, Q region locus 2 Gene [Source:MGI Symbol;Acc:MGI:95931]	K/T		TRUE
	Sudbery et al 2009	17	35400562	C/A	C			A	ENSMUST00000078966	ENSMUSG00000073411	MGI95931	NON_SYNONYMOUS_CODING	<0.1	benign	0.958	histocompatibility 2, Q region locus 2 Gene [Source:MGI Symbol;Acc:MGI:95931]	N/K		TRUE
	Sudbery et al 2009	17	35400568	C/A	C			A	ENSMUST00000078966	ENSMUSG00000073411	MGI95931	SYNONYMOUS_CODING	<0.1			histocompatibility 2, Q region locus 2 Gene [Source:MGI Symbol;Acc:MGI:95931]	L		TRUE
	Sudbery et al 2009	17	35400819	T/G	T	G	G		ENSMUST00000078966	ENSMUSG00000073411	MGI95931	NON_SYNONYMOUS_CODING	<0.1	benign	0.295	histocompatibility 2, Q region locus 2 Gene [Source:MGI Symbol;Acc:MGI:95931]	L/V		TRUE
	Sudbery et al 2009	17	35400831	T/G	T		G	G	ENSMUST00000078966	ENSMUSG00000073411	MGI95931	NON_SYNONYMOUS_CODING	<0.1	benign	0.339	histocompatibility 2, Q region locus 2 Gene [Source:MGI Symbol;Acc:MGI:95931]	W/G		TRUE
	Sudbery et al 2009	17	35400853	T/A	T		A		ENSMUST00000078966	ENSMUSG00000073411	MGI95931	NON_SYNONYMOUS_CODING	<0.1	probably damaging	0.563	histocompatibility 2, Q region locus 2 Gene [Source:MGI Symbol;Acc:MGI:95931]	L/Q		TRUE
	Sudbery et al 2009	17	35496689	T/G	T	G	G		ENSMUST00000105041	ENSMUSG00000079507	NP_034520	SYNONYMOUS_CODING	<0.1			histocompatibility 2, Q region locus 1 [Source:RefSeq peptide;Acc:NP_034520]	L		TRUE
	Sudbery et al 2009	17	35496691	G/A	G	A	A		ENSMUST00000105041	ENSMUSG00000079507	NP_034520	NON_SYNONYMOUS_CODING	<0.1	possibly damaging	0.881	histocompatibility 2, Q region locus 1 [Source:RefSeq peptide;Acc:NP_034520]	G/E		TRUE
	Sudbery et al 2009	17	35531973	A/G	A	G	G		ENSMUST00000040240	ENSMUSG00000055413	MGI95937	SYNONYMOUS_CODING	<0.1			histocompatibility 2, Q region locus 8 Gene [Source:MGI Symbol;Acc:MGI:95937]	0		TRUE
	Sudbery et al 2009	17	35531986	A/G	A	G	G		ENSMUST00000040240	ENSMUSG00000055413	MGI95937	NON_SYNONYMOUS_CODING	<0.1	benign	0.958	histocompatibility 2, Q region locus 8 Gene [Source:MGI Symbol;Acc:MGI:95937]	K/R		TRUE
	Sudbery et al 2009	17	35562698	A/G	A			G	ENSMUST00000113879	ENSMUSG00000073409	MGI2137763	NON_SYNONYMOUS_CODING	<0.1			minisatellite 10t detected by probe MMS10 Other Genome Feature [Source:MGI Symbol;Acc:MGI:2137763]	I/V		TRUE
	Sudbery et al 2009	17	35562699	T/A	T			A	ENSMUST00000113879	ENSMUSG00000073409	MGI2137763	NON_SYNONYMOUS_CODING	<0.1			minisatellite 10t detected by probe MMS10 Other Genome Feature [Source:MGI Symbol;Acc:MGI:2137763]	I/N		TRUE
	Sudbery et al 2009	17	35562761	C/G	C			G	ENSMUST00000113879	ENSMUSG00000073409	MGI2137763	NON_SYNONYMOUS_CODING	0.726			minisatellite 10t detected by probe MMS10 Other Genome Feature [Source:MGI Symbol;Acc:MGI:2137763]	Q/E		TRUE
	Sudbery et al 2009	17	35562767	C/G	C			G	ENSMUST00000113879	ENSMUSG00000073409	MGI2137763	NON_SYNONYMOUS_CODING	0.762			minisatellite 10t detected by probe MMS10 Other Genome Feature [Source:MGI Symbol;Acc:MGI:2137763]	R/G		TRUE
	Sudbery et al 2009	17	35657943	G/A	G			A	ENSMUST00000045956	ENSMUSG00000040312	MGI2385321	SYNONYMOUS_CODING	1			coiled-coil alpha-helical rod protein 1 Gene [Source:MGI Symbol;Acc:MGI:2385321]	0		TRUE
	Sudbery et al 2009	17	35662282	A/G	A			G	ENSMUST00000045956	ENSMUSG00000040312	MGI2385321	SYNONYMOUS_CODING	0.998			coiled-coil alpha-helical rod protein 1 Gene [Source:MGI Symbol;Acc:MGI:2385321]	V		TRUE
	ss159822631	17	35665497		G	C	C	C	ENSMUSG00000040312		Cchcr1		<0.1			Coiled-coil alpha-helical rod protein 1 (Alpha-helical coiled-coil rod protein) [Source:UniProtKB/Swiss-Prot;Acc:Q8K2I2]			TRUE
	Sudbery et al 2009	17	35666000	G/A	G	A	A		ENSMUST00000045956	ENSMUSG00000040312	MGI2385321	SYNONYMOUS_CODING	1			coiled-coil alpha-helical rod protein 1 Gene [Source:MGI Symbol;Acc:MGI:2385321]	E		TRUE
	Sudbery et al 2009	17	35689157	T/G	T	G	G	G	ENSMUST00000044804	ENSMUSG00000039518	MGI3505689	SYNONYMOUS_CODING	<0.1			corneodesmosin Gene [Source:MGI Symbol;Acc:MGI:3505689]	S		TRUE
	Sudbery et al 2009	17	35689159	G/A	G	A	A	A	ENSMUST00000044804	ENSMUSG00000039518	MGI3505689	NON_SYNONYMOUS_CODING	<0.1	benign	?	corneodesmosin Gene [Source:MGI Symbol;Acc:MGI:3505689]	R/Q		TRUE
	ss159822655	17	35691637		A	G	G	G	ENSMUSG00000039518		Cdsn		0.995			Corneodesmosin Precursor [Source:UniProtKB/Swiss-Prot;Acc:Q7TPC1]			TRUE
	Sudbery et al 2009	17	35691905	T/A	T			A	ENSMUST00000044804	ENSMUSG00000039518	MGI3505689	NON_SYNONYMOUS_CODING	<0.1	benign	?	corneodesmosin Gene [Source:MGI Symbol;Acc:MGI:3505689]	S/T		TRUE
	ss159828442	17	35691905		T		A		ENSMUSG00000039518		Cdsn		<0.1			Corneodesmosin Precursor [Source:UniProtKB/Swiss-Prot;Acc:Q7TPC1]			TRUE
	ss159822656	17	35691917		G	A			ENSMUSG00000039518		Cdsn		<0.1			Corneodesmosin Precursor [Source:UniProtKB/Swiss-Prot;Acc:Q7TPC1]			TRUE
	Sudbery et al 2009	17	35691926	T/A	T				ENSMUST00000044804	ENSMUSG00000039518	MGI3505689	NON_SYNONYMOUS_CODING	<0.1	benign	?	corneodesmosin Gene [Source:MGI Symbol;Acc:MGI:3505689]	S/T		TRUE
	ss159822657	17	35691926		T	A			ENSMUSG00000039518		Cdsn		<0.1			Corneodesmosin Precursor [Source:UniProtKB/Swiss-Prot;Acc:Q7TPC1]			TRUE
	ss159822658	17	35692339		T	C	C	C	ENSMUSG00000039518		Cdsn		0.966			Corneodesmosin Precursor [Source:UniProtKB/Swiss-Prot;Acc:Q7TPC1]			TRUE
	ss159822659	17	35692372		G	A	A	A	ENSMUSG00000039518		Cdsn		1			Corneodesmosin Precursor [Source:UniProtKB/Swiss-Prot;Acc:Q7TPC1]			TRUE
	ss159829818	17	35692719		C			T	ENSMUSG00000039518		Cdsn		0.322			Corneodesmosin Precursor [Source:UniProtKB/Swiss-Prot;Acc:Q7TPC1]			TRUE
	ss159822660	17	35692856		C	T	T		ENSMUSG00000039518		Cdsn		0.531			Corneodesmosin Precursor [Source:UniProtKB/Swiss-Prot;Acc:Q7TPC1]			TRUE
	ss159822661	17	35692867		T	G	G		ENSMUSG00000039518		Cdsn		0.961			Corneodesmosin Precursor [Source:UniProtKB/Swiss-Prot;Acc:Q7TPC1]			TRUE
	ss159822663	17	35693002		G	A	A	A	ENSMUSG00000039518		Cdsn		<0.1			Corneodesmosin Precursor [Source:UniProtKB/Swiss-Prot;Acc:Q7TPC1]			TRUE
	ss159822664	17	35693134		A	G	G	G	ENSMUSG00000039518		Cdsn		0.995			Corneodesmosin Precursor [Source:UniProtKB/Swiss-Prot;Acc:Q7TPC1]			TRUE
	Sudbery et al 2009	17	35704867	A/G	A		G		ENSMUST00000044326	ENSMUSG00000039269	MGI1916792	SYNONYMOUS_CODING	<0.1			RIKEN cDNA 2300002M23 gene Gene [Source:MGI Symbol;Acc:MGI:1916792]	G		TRUE
	ss159822686	17	35705160		T	C	C		ENSMUSG00000039269		2300002M23Rik		<0.1			Uncharacterized protein C6orf15 homolog Precursor (Protein STG)(Extracellular matrix protein with prion homology)(Emprin) [Source:UniProtKB/Swiss-Prot;Acc:Q8BM15]			TRUE
	Sudbery et al 2009	17	35773832	A/G	A	G			ENSMUST00000095467	ENSMUSG00000073408	MGI2685476	SYNONYMOUS_CODING	0.975			diffuse panbronchiolitis critical region 1 (human) Gene [Source:MGI Symbol;Acc:MGI:2685476]	V		TRUE
	ss159822936	17	35773870		G	C	C	C	ENSMUSG00000073408		Dpcr1		<0.1			Diffuse panbronchiolitis critical region protein 1 homolog Precursor [Source:UniProtKB/Swiss-Prot;Acc:Q3TNW5]			TRUE
	Sudbery et al 2009	17	35774433	G/A	G		A		ENSMUST00000095467	ENSMUSG00000073408	MGI2685476	SYNONYMOUS_CODING	<0.1			diffuse panbronchiolitis critical region 1 (human) Gene [Source:MGI Symbol;Acc:MGI:2685476]	T		TRUE
	Sudbery et al 2009	17	35774610	T/C	T		C		ENSMUST00000095467	ENSMUSG00000073408	MGI2685476	SYNONYMOUS_CODING	<0.1			diffuse panbronchiolitis critical region 1 (human) Gene [Source:MGI Symbol;Acc:MGI:2685476]	R		TRUE
	Sudbery et al 2009	17	35793936	T/C	T	C			ENSMUST00000043674	ENSMUSG00000038838	MGI1916165	NON_SYNONYMOUS_CODING	0.684	benign	0.182	valyl-tRNA synthetase 2, mitochondrial (putative) Gene [Source:MGI Symbol;Acc:MGI:1916165]	T/A		TRUE
	ss159828508	17	35794048		T		C	C	ENSMUSG00000038838		Vars2		<0.1			"Valyl-tRNA synthetase			TRUE
	ss159823031	17	35794246		T	C	C	C	ENSMUSG00000038838		Vars2		0.323			"Valyl-tRNA synthetase			TRUE
	ss159823043	17	35795088		T	C			ENSMUSG00000038838		Vars2		<0.1			"Valyl-tRNA synthetase			TRUE
	ss159829901	17	35798530		A			C	ENSMUSG00000038838		Vars2		0.624			"Valyl-tRNA synthetase			TRUE
	Sudbery et al 2009	17	35801021	T/A	T	A	A		ENSMUST00000043674	ENSMUSG00000038838	MGI1916165	NON_SYNONYMOUS_CODING	0.988			valyl-tRNA synthetase 2, mitochondrial (putative) Gene [Source:MGI Symbol;Acc:MGI:1916165]	E/V		TRUE
	Sudbery et al 2009	17	35801022	C/G	C	G	G		ENSMUST00000043674	ENSMUSG00000038838	MGI1916165	NON_SYNONYMOUS_CODING	0.988			valyl-tRNA synthetase 2, mitochondrial (putative) Gene [Source:MGI Symbol;Acc:MGI:1916165]	E/Q		TRUE
	ss159823083	17	35801540		C	T	T	T	ENSMUSG00000038838		Vars2		0.512			"Valyl-tRNA synthetase			TRUE
	ss159823086	17	35801767		A	G	G	G	ENSMUSG00000038838		Vars2		0.399			"Valyl-tRNA synthetase			TRUE
	ss159823087	17	35801776		T	C	C	C	ENSMUSG00000038838		Vars2		1			"Valyl-tRNA synthetase			TRUE
	ss159823091	17	35802793		C	T		T	ENSMUSG00000038838		Vars2		0.942			"Valyl-tRNA synthetase			TRUE
	Sudbery et al 2009	17	35802793	C/T	C		T		ENSMUST00000043674	ENSMUSG00000038838	MGI1916165	SYNONYMOUS_CODING	0.942			valyl-tRNA synthetase 2, mitochondrial (putative) Gene [Source:MGI Symbol;Acc:MGI:1916165]	R		TRUE
	ss159823092	17	35802825		T	C	C	C	ENSMUSG00000038838		Vars2		0.997			"Valyl-tRNA synthetase			TRUE
	ss159823098	17	35806272		A	G	G	G	ENSMUSG00000001524		Gtf2h4		0.993			General transcription factor IIH subunit 4 (General transcription factor IIH polypeptide 4)(TFIIH basal transcription factor complex p52 subunit)(Basic transcription factor 2 52 kDa subunit)(BTF2-p52) [Source:UniProtKB/Swiss-Prot;Acc:O70422]			TRUE
	Sudbery et al 2009	17	35807174	G/A	G		A		ENSMUST00000001565	ENSMUSG00000001524	MGI1338799	SYNONYMOUS_CODING	0.998			general transcription factor II H, polypeptide 4 Gene [Source:MGI Symbol;Acc:MGI:1338799]	0		TRUE
	ss159823103	17	35808188		T	C		C	ENSMUSG00000001524		Gtf2h4		0.999			General transcription factor IIH subunit 4 (General transcription factor IIH polypeptide 4)(TFIIH basal transcription factor complex p52 subunit)(Basic transcription factor 2 52 kDa subunit)(BTF2-p52) [Source:UniProtKB/Swiss-Prot;Acc:O70422]			TRUE
	ss159823111	17	35809708		C	T	T	T	ENSMUSG00000001524		Gtf2h4		0.991			General transcription factor IIH subunit 4 (General transcription factor IIH polypeptide 4)(TFIIH basal transcription factor complex p52 subunit)(Basic transcription factor 2 52 kDa subunit)(BTF2-p52) [Source:UniProtKB/Swiss-Prot;Acc:O70422]			TRUE
	ss159823112	17	35809756		C	A	A	A	ENSMUSG00000001524		Gtf2h4		<0.1			General transcription factor IIH subunit 4 (General transcription factor IIH polypeptide 4)(TFIIH basal transcription factor complex p52 subunit)(Basic transcription factor 2 52 kDa subunit)(BTF2-p52) [Source:UniProtKB/Swiss-Prot;Acc:O70422]			TRUE
	ss159823383	17	35984304		C	T		T	ENSMUSG00000061607		Mdc1		<0.1			Mediator of DNA damage checkpoint protein 1 [Source:UniProtKB/Swiss-Prot;Acc:Q5PSV9]			TRUE
	Sudbery et al 2009	17	35989472	C/T	C	T	T		ENSMUST00000082337	ENSMUSG00000061607	MGI3525201	NON_SYNONYMOUS_CODING	<0.1	benign	1.35	mediator of DNA damage checkpoint 1 Gene [Source:MGI Symbol;Acc:MGI:3525201]	S/L		TRUE
	ss159823392	17	36004581		T	C		C	ENSMUSG00000034595		2310014H01Rik		1			Phostensin (Protein phosphatase 1 F-actin cytoskeleton-targeting subunit) [Source:UniProtKB/Swiss-Prot;Acc:Q8BQ30]			TRUE
	ss159823401	17	36026540		A	C	C	C	ENSMUSG00000024422		Dhx16		0.953			DEAH (Asp-Glu-Ala-His) box polypeptide 16 [Source:RefSeq peptide;Acc:NP_081263]			TRUE
	Sudbery et al 2009	17	36034034	G/A	G			A	ENSMUST00000059740	ENSMUSG00000050705	MGI1916912	NON_SYNONYMOUS_CODING	<0.1			RIKEN cDNA 2310061I04 gene Gene [Source:MGI Symbol;Acc:MGI:1916912]	0		TRUE
	Sudbery et al 2009	17	36034803	C/T	C			T	ENSMUST00000077494	ENSMUSG00000024426	MGI1913869	SYNONYMOUS_CODING	<0.1			RIKEN cDNA 2610110G12 gene Gene [Source:MGI Symbol;Acc:MGI:1913869]	0		TRUE
	Sudbery et al 2009	17	36110720	G/A	G	A			ENSMUST00000055454	ENSMUSG00000038500	MGI1922460	SYNONYMOUS_CODING	1			proline-rich polypeptide 3 Gene [Source:MGI Symbol;Acc:MGI:1922460]	0		TRUE
	Sudbery et al 2009	17	36117155	G/A	G		A		ENSMUST00000087200	ENSMUSG00000024429	MGI95764	5PRIME_UTR	0.998			guanine nucleotide binding protein-like 1 Gene [Source:MGI Symbol;Acc:MGI:95764]	0		TRUE
	Sudbery et al 2009	17	36154307	A/G	A	G			ENSMUST00000116595	ENSMUSG00000053835	H2-T24-001	SYNONYMOUS_CODING	0.2			histocompatibility 2, T region locus 24 Gene [Source:MGI (curated);Acc:H2-T24-001]	H		TRUE
	Sudbery et al 2009	17	36178443	A/G	A	G			ENSMUST00000080015	ENSMUSG00000056116	H2-T22-002	SYNONYMOUS_CODING	<0.1			histocompatibility 2, T region locus 22 Gene [Source:MGI (curated);Acc:H2-T22-002]	D		TRUE
	Sudbery et al 2009	17	36178476	G/C	G	C			ENSMUST00000080015	ENSMUSG00000056116	H2-T22-002	NON_SYNONYMOUS_CODING	<0.1			histocompatibility 2, T region locus 22 Gene [Source:MGI (curated);Acc:H2-T22-002]	H/Q		TRUE
	Sudbery et al 2009	17	36178522	T/C	T	C			ENSMUST00000080015	ENSMUSG00000056116	H2-T22-002	NON_SYNONYMOUS_CODING	<0.1			histocompatibility 2, T region locus 22 Gene [Source:MGI (curated);Acc:H2-T22-002]	N/S		TRUE
	Sudbery et al 2009	17	36220240	G/C	G			C	ENSMUST00000025333	ENSMUSG00000073406	MGI892004	NON_SYNONYMOUS_CODING	0.765	benign	1.287	histocompatibility 2, blastocyst Gene [Source:MGI Symbol;Acc:MGI:892004]	A/G		TRUE
	Sudbery et al 2009	17	36220245	C/T	C			T	ENSMUST00000025333	ENSMUSG00000073406	MGI892004	SYNONYMOUS_CODING	0.787			histocompatibility 2, blastocyst Gene [Source:MGI Symbol;Acc:MGI:892004]	L		TRUE
	Sudbery et al 2009	17	36220314	A/G	A	G			ENSMUST00000025333	ENSMUSG00000073406	MGI892004	SYNONYMOUS_CODING	<0.1			histocompatibility 2, blastocyst Gene [Source:MGI Symbol;Acc:MGI:892004]	D		TRUE
	Sudbery et al 2009	17	36220762	C/G	C	G			ENSMUST00000025333	ENSMUSG00000073406	MGI892004	SYNONYMOUS_CODING	0.81			histocompatibility 2, blastocyst Gene [Source:MGI Symbol;Acc:MGI:892004]	P		TRUE
	Sudbery et al 2009	17	36220767	C/A	C	A			ENSMUST00000025333	ENSMUSG00000073406	MGI892004	NON_SYNONYMOUS_CODING	0.793	benign	1.035	histocompatibility 2, blastocyst Gene [Source:MGI Symbol;Acc:MGI:892004]	A/S		TRUE
	Sudbery et al 2009	17	36221117	C/G	C	G			ENSMUST00000025333	ENSMUSG00000073406	MGI892004	NON_SYNONYMOUS_CODING	0.205	benign	0.192	histocompatibility 2, blastocyst Gene [Source:MGI Symbol;Acc:MGI:892004]	E/Q		TRUE
	Sudbery et al 2009	17	36221124	A/G	A	G			ENSMUST00000025333	ENSMUSG00000073406	MGI892004	SYNONYMOUS_CODING	<0.1			histocompatibility 2, blastocyst Gene [Source:MGI Symbol;Acc:MGI:892004]	T		TRUE
	Sudbery et al 2009	17	36221136	C/T	C	T			ENSMUST00000025333	ENSMUSG00000073406	MGI892004	SYNONYMOUS_CODING	<0.1			histocompatibility 2, blastocyst Gene [Source:MGI Symbol;Acc:MGI:892004]	A		TRUE
	Sudbery et al 2009	17	36247633	C/T	C	T			ENSMUST00000076143	ENSMUSG00000073405		NON_SYNONYMOUS_CODING	0.324	benign	1.442		S/N		TRUE
	Sudbery et al 2009	17	36247714	G/A	G	A			ENSMUST00000076143	ENSMUSG00000073405		NON_SYNONYMOUS_CODING	<0.1	benign	0.568		A/V		TRUE
	Sudbery et al 2009	17	36247715	C/T	C	T			ENSMUST00000076143	ENSMUSG00000073405		NON_SYNONYMOUS_CODING	<0.1	benign	0.437		A/T		TRUE
	Sudbery et al 2009	17	36247776	T/C	T		C		ENSMUST00000076143	ENSMUSG00000073405		SYNONYMOUS_CODING	0.946				E		TRUE
	Sudbery et al 2009	17	36247806	A/G	A	G	G		ENSMUST00000076143	ENSMUSG00000073405		SYNONYMOUS_CODING	0.169				Y		TRUE
	Sudbery et al 2009	17	36248106	C/G	C		G		ENSMUST00000076143	ENSMUSG00000073405		NON_SYNONYMOUS_CODING	<0.1	benign	0.301		K/N		TRUE
	Sudbery et al 2009	17	36256207	A/C	A	C			ENSMUST00000074201	ENSMUSG00000079491	MGI95942	SYNONYMOUS_CODING	0.111			histocompatibility 2, T region locus 10 Gene [Source:MGI Symbol;Acc:MGI:95942]	P		TRUE
	Sudbery et al 2009	17	36257648	T/C	T		C		ENSMUST00000074201	ENSMUSG00000079491	MGI95942	SYNONYMOUS_CODING	<0.1			histocompatibility 2, T region locus 10 Gene [Source:MGI Symbol;Acc:MGI:95942]	E		TRUE
	Sudbery et al 2009	17	36257658	T/C	T		C		ENSMUST00000074201	ENSMUSG00000079491	MGI95942	NON_SYNONYMOUS_CODING	<0.1			histocompatibility 2, T region locus 10 Gene [Source:MGI Symbol;Acc:MGI:95942]	D/G		TRUE
	Sudbery et al 2009	17	36279288	C/T	C	T			ENSMUST00000064686	ENSMUSG00000073403		NON_SYNONYMOUS_CODING	<0.1	benign	0.143		G/E		TRUE
	Sudbery et al 2009	17	36279300	T/G	T	G			ENSMUST00000064686	ENSMUSG00000073403		NON_SYNONYMOUS_CODING	0.141	benign	1.185		D/A		TRUE
	Sudbery et al 2009	17	36279661	G/T	G	T			ENSMUST00000064686	ENSMUSG00000073403		NON_SYNONYMOUS_CODING	<0.1	benign	0.248		T/K		TRUE
	Sudbery et al 2009	17	36279686	A/C	A	C			ENSMUST00000064686	ENSMUSG00000073403		NON_SYNONYMOUS_CODING	<0.1	benign	0.298		S/A		TRUE
	Sudbery et al 2009	17	36279687	T/C	T	C			ENSMUST00000064686	ENSMUSG00000073403		SYNONYMOUS_CODING	<0.1				V		TRUE
	Sudbery et al 2009	17	36281992	G/T	G	T			ENSMUST00000064686	ENSMUSG00000073403		NON_SYNONYMOUS_CODING	<0.1				L/M		TRUE
	Sudbery et al 2009	17	36282002	C/T	C	T			ENSMUST00000064686	ENSMUSG00000073403		SYNONYMOUS_CODING	<0.1				T		TRUE
	Sudbery et al 2009	17	36282016	A/G	A	G			ENSMUST00000064686	ENSMUSG00000073403		SYNONYMOUS_CODING	<0.1				L		TRUE
	Sudbery et al 2009	17	36282068	T/C	T	C			ENSMUST00000064686	ENSMUSG00000073403		SYNONYMOUS_CODING	<0.1				G		TRUE
	Sudbery et al 2009	17	36282434	C/G	C				ENSMUST00000064686	ENSMUSG00000073403		NON_SYNONYMOUS_CODING	<0.1				R/P		TRUE
	Sudbery et al 2009	17	36282442	G/C	G				ENSMUST00000064686	ENSMUSG00000073403		NON_SYNONYMOUS_CODING	<0.1				H/Q		TRUE
	Sudbery et al 2009	17	36282472	C/T	C	T			ENSMUST00000064686	ENSMUSG00000073403		SYNONYMOUS_CODING	<0.1				R		TRUE
	Sudbery et al 2009	17	36282541	T/C	T				ENSMUST00000064686	ENSMUSG00000073403		SYNONYMOUS_CODING	<0.1				R		TRUE
	Sudbery et al 2009	17	36282547	T/C	T	C			ENSMUST00000064686	ENSMUSG00000073403		SYNONYMOUS_CODING	<0.1				E		TRUE
	Sudbery et al 2009	17	36282570	A/C	A				ENSMUST00000064686	ENSMUSG00000073403		NON_SYNONYMOUS_CODING	<0.1				L/V		TRUE
	Sudbery et al 2009	17	36282602	C/G	C			G	ENSMUST00000064686	ENSMUSG00000073403		NON_SYNONYMOUS_CODING	<0.1				G/A		TRUE
	Sudbery et al 2009	17	36282852	A/G	A	G			ENSMUST00000064686	ENSMUSG00000073403		NON_SYNONYMOUS_CODING	<0.1				L/P		TRUE
	Sudbery et al 2009	17	36298610	A/G	A		G	G	ENSMUST00000090537	ENSMUSG00000038311	MGI1916967	NON_SYNONYMOUS_CODING	<0.1			RIKEN cDNA 2410017I17 gene Gene [Source:MGI Symbol;Acc:MGI:1916967]	H/R		TRUE
	Sudbery et al 2009	17	36298612	G/A	G		A	A	ENSMUST00000090537	ENSMUSG00000038311	MGI1916967	NON_SYNONYMOUS_CODING	<0.1			RIKEN cDNA 2410017I17 gene Gene [Source:MGI Symbol;Acc:MGI:1916967]	A/T		TRUE
	Sudbery et al 2009	17	36298620	T/G	T				ENSMUST00000090537	ENSMUSG00000038311	MGI1916967	NON_SYNONYMOUS_CODING	<0.1			RIKEN cDNA 2410017I17 gene Gene [Source:MGI Symbol;Acc:MGI:1916967]	H/Q		TRUE
	Sudbery et al 2009	17	36298646	G/A	G	A			ENSMUST00000090537	ENSMUSG00000038311	MGI1916967	NON_SYNONYMOUS_CODING	<0.1			RIKEN cDNA 2410017I17 gene Gene [Source:MGI Symbol;Acc:MGI:1916967]	R/Q		TRUE
	Sudbery et al 2009	17	36298666	A/G	A	G			ENSMUST00000090537	ENSMUSG00000038311	MGI1916967	NON_SYNONYMOUS_CODING	<0.1			RIKEN cDNA 2410017I17 gene Gene [Source:MGI Symbol;Acc:MGI:1916967]	S/G		TRUE
	Sudbery et al 2009	17	36298675	C/A	C	A			ENSMUST00000090537	ENSMUSG00000038311	MGI1916967	NON_SYNONYMOUS_CODING	<0.1			RIKEN cDNA 2410017I17 gene Gene [Source:MGI Symbol;Acc:MGI:1916967]	R/S		TRUE
	Sudbery et al 2009	17	36298719	A/T	A				ENSMUST00000090537	ENSMUSG00000038311	MGI1916967	SYNONYMOUS_CODING	<0.1			RIKEN cDNA 2410017I17 gene Gene [Source:MGI Symbol;Acc:MGI:1916967]	T		TRUE
	Sudbery et al 2009	17	36298736	C/T	C	T			ENSMUST00000090537	ENSMUSG00000038311	MGI1916967	NON_SYNONYMOUS_CODING	<0.1			RIKEN cDNA 2410017I17 gene Gene [Source:MGI Symbol;Acc:MGI:1916967]	T/I		TRUE
	Sudbery et al 2009	17	36298737	C/G	C				ENSMUST00000090537	ENSMUSG00000038311	MGI1916967	SYNONYMOUS_CODING	<0.1			RIKEN cDNA 2410017I17 gene Gene [Source:MGI Symbol;Acc:MGI:1916967]	T		TRUE
	Sudbery et al 2009	17	36298752	C/T	C				ENSMUST00000090537	ENSMUSG00000038311	MGI1916967	SYNONYMOUS_CODING	<0.1			RIKEN cDNA 2410017I17 gene Gene [Source:MGI Symbol;Acc:MGI:1916967]	S		TRUE
	Sudbery et al 2009	17	36298761	G/T	G				ENSMUST00000090537	ENSMUSG00000038311	MGI1916967	SYNONYMOUS_CODING	<0.1			RIKEN cDNA 2410017I17 gene Gene [Source:MGI Symbol;Acc:MGI:1916967]	A		TRUE
	Sudbery et al 2009	17	36298768	A/G	A				ENSMUST00000090537	ENSMUSG00000038311	MGI1916967	NON_SYNONYMOUS_CODING	<0.1			RIKEN cDNA 2410017I17 gene Gene [Source:MGI Symbol;Acc:MGI:1916967]	S/G		TRUE
	Sudbery et al 2009	17	36298778	T/C	T				ENSMUST00000090537	ENSMUSG00000038311	MGI1916967	NON_SYNONYMOUS_CODING	<0.1			RIKEN cDNA 2410017I17 gene Gene [Source:MGI Symbol;Acc:MGI:1916967]	L/P		TRUE
	Sudbery et al 2009	17	36298787	C/A	C				ENSMUST00000090537	ENSMUSG00000038311	MGI1916967	NON_SYNONYMOUS_CODING	<0.1			RIKEN cDNA 2410017I17 gene Gene [Source:MGI Symbol;Acc:MGI:1916967]	S/Y		TRUE
	Sudbery et al 2009	17	36298803	T/G	T				ENSMUST00000090537	ENSMUSG00000038311	MGI1916967	SYNONYMOUS_CODING	<0.1			RIKEN cDNA 2410017I17 gene Gene [Source:MGI Symbol;Acc:MGI:1916967]	L		TRUE
	Sudbery et al 2009	17	36298815	T/G	T				ENSMUST00000090537	ENSMUSG00000038311	MGI1916967	SYNONYMOUS_CODING	<0.1			RIKEN cDNA 2410017I17 gene Gene [Source:MGI Symbol;Acc:MGI:1916967]	S		TRUE
	Sudbery et al 2009	17	36298890	G/C	G				ENSMUST00000090537	ENSMUSG00000038311	MGI1916967	SYNONYMOUS_CODING	<0.1			RIKEN cDNA 2410017I17 gene Gene [Source:MGI Symbol;Acc:MGI:1916967]	P		TRUE
	Sudbery et al 2009	17	36298900	T/G	T				ENSMUST00000090537	ENSMUSG00000038311	MGI1916967	NON_SYNONYMOUS_CODING	<0.1			RIKEN cDNA 2410017I17 gene Gene [Source:MGI Symbol;Acc:MGI:1916967]	C/G		TRUE
	Sudbery et al 2009	17	36298913	A/C	A				ENSMUST00000090537	ENSMUSG00000038311	MGI1916967	NON_SYNONYMOUS_CODING	<0.1			RIKEN cDNA 2410017I17 gene Gene [Source:MGI Symbol;Acc:MGI:1916967]	D/A		TRUE
	Sudbery et al 2009	17	36298932	A/G	A				ENSMUST00000090537	ENSMUSG00000038311	MGI1916967	SYNONYMOUS_CODING	0.156			RIKEN cDNA 2410017I17 gene Gene [Source:MGI Symbol;Acc:MGI:1916967]	E		TRUE
	Sudbery et al 2009	17	36298988	C/A	C				ENSMUST00000090537	ENSMUSG00000038311	MGI1916967	NON_SYNONYMOUS_CODING	<0.1			RIKEN cDNA 2410017I17 gene Gene [Source:MGI Symbol;Acc:MGI:1916967]	A/E		TRUE
	ss159823776	17	36326297		A	G	G	G	ENSMUSG00000054128		H2-T3		<0.1			"H-2 class I histocompatibility antigen			TRUE
	ss159823987	17	36405976		T	C		C	ENSMUSG00000045409		Trim39		0.998			Tripartite motif-containing protein 39 (RING finger protein 23)(Testis-abundant finger protein) [Source:UniProtKB/Swiss-Prot;Acc:Q9ESN2]			TRUE
	Sudbery et al 2009	17	36405976	T/C	T		C		ENSMUST00000113706	ENSMUSG00000045409	MGI1890659	NON_SYNONYMOUS_CODING	0.998			tripartite motif-containing 39 Gene [Source:MGI Symbol;Acc:MGI:1890659]	T/A		TRUE
	Sudbery et al 2009	17	36422986	C/T	C			T	ENSMUST00000113702	ENSMUSG00000023083	MGI1276525	NON_SYNONYMOUS_CODING	0.101			histocompatibility 2, M region locus 10.2 Gene [Source:MGI Symbol;Acc:MGI:1276525]	G/S		TRUE
	Sudbery et al 2009	17	36589276	G/A	G	A		A	ENSMUST00000057964	ENSMUSG00000044538		NON_SYNONYMOUS_CODING	<0.1				P/L		TRUE
	Sudbery et al 2009	17	36589811	G/A	G			A	ENSMUST00000057964	ENSMUSG00000044538		SYNONYMOUS_CODING	<0.1				L		TRUE
	Sudbery et al 2009	17	36589943	T/A	T			A	ENSMUST00000057964	ENSMUSG00000044538		NON_SYNONYMOUS_CODING	<0.1				T/S		TRUE
	Sudbery et al 2009	17	36597196	G/A	G				ENSMUST00000057502	ENSMUSG00000048231	MGI1276527	SYNONYMOUS_CODING	<0.1			histocompatibility 2, M region locus 10.4 Gene [Source:MGI Symbol;Acc:MGI:1276527]	T		TRUE
	Sudbery et al 2009	17	36684410	T/C	T	C			ENSMUST00000041964	ENSMUSG00000037537	MGI2676637	SYNONYMOUS_CODING	<0.1			histocompatibility 2, M region locus 11 Gene [Source:MGI Symbol;Acc:MGI:2676637]	G		TRUE
	Sudbery et al 2009	17	36807261	C/T	C	T			ENSMUST00000041662	ENSMUSG00000037334	H2-M1-001	NON_SYNONYMOUS_CODING	0.537			histocompatibility 2, M region locus 1 Gene [Source:MGI (curated);Acc:H2-M1-001]	E/K		TRUE
	Sudbery et al 2009	17	36808179	T/C	T				ENSMUST00000041662	ENSMUSG00000037334	H2-M1-001	SYNONYMOUS_CODING	<0.1			histocompatibility 2, M region locus 1 Gene [Source:MGI (curated);Acc:H2-M1-001]	G		TRUE
Locus	SNP_ID	Chr	position	ALLELES	C57BL6	AJ	Balbc	C3H	Gene	Transcript	GeneId	Consequence	phastCons	PolyphenConsequence	PolyphenStat	Description	Peptide shift	AA_Position	TRUE
Tir2-F12	NES10453359	5	72995060	T/C	TT			TT	ENSMUSG00000067220	ENSMUST00000087213	Cnga1-001	3PRIME_UTR	<0.1			cGMP-gated cation channel alpha-1 (CNG channel alpha-1)(CNG-1)(CNG1)(Cyclic nucleotide-gated channel alpha-1)(Cyclic nucleotide-gated channel, photoreceptor)(Cyclic nucleotide-gated cation channel 1)(Rod photoreceptor cGMP-gated channel subunit alpha		NULL	FALSE
Tir2-F12	NES16682477	5	73173256	C/T	CC		TT	TT	ENSMUSG00000029217	ENSMUST00000073843	Tec-005	SYNONYMOUS_CODING	0.949			Tyrosine-protein kinase Tec (EC 2.7.10.2) [Source:UniProtKB/Swiss-Prot;Acc:P24604]		NULL	TRUE
Tir2-F12	NES16682477	5	73173256	C/T	CC		TT	TT	ENSMUSG00000029217	ENSMUST00000071944	Tec-001	SYNONYMOUS_CODING	0.949			Tyrosine-protein kinase Tec (EC 2.7.10.2) [Source:UniProtKB/Swiss-Prot;Acc:P24604]		NULL	TRUE
Tir2-F12	NES16682477	5	73173256	C/T	CC		TT	TT	ENSMUSG00000029217	ENSMUST00000113594	Tec-002	SYNONYMOUS_CODING	0.949			Tyrosine-protein kinase Tec (EC 2.7.10.2) [Source:UniProtKB/Swiss-Prot;Acc:P24604]		NULL	TRUE
Tir2-F12	NES16682477	5	73173256	C/T	CC		TT	TT	ENSMUSG00000029217	ENSMUST00000113593	Tec-201	SYNONYMOUS_CODING	0.949			Tyrosine-protein kinase Tec (EC 2.7.10.2) [Source:UniProtKB/Swiss-Prot;Acc:P24604]		NULL	TRUE
Tir2-F12	NES16682478	5	73173346	G/A	GG			AA	ENSMUSG00000029217	ENSMUST00000073843	Tec-005	SYNONYMOUS_CODING	1			Tyrosine-protein kinase Tec (EC 2.7.10.2) [Source:UniProtKB/Swiss-Prot;Acc:P24604]		NULL	TRUE
Tir2-F12	NES16682478	5	73173346	G/A	GG			AA	ENSMUSG00000029217	ENSMUST00000071944	Tec-001	SYNONYMOUS_CODING	1			Tyrosine-protein kinase Tec (EC 2.7.10.2) [Source:UniProtKB/Swiss-Prot;Acc:P24604]		NULL	TRUE
Tir2-F12	NES16682478	5	73173346	G/A	GG			AA	ENSMUSG00000029217	ENSMUST00000113594	Tec-002	SYNONYMOUS_CODING	1			Tyrosine-protein kinase Tec (EC 2.7.10.2) [Source:UniProtKB/Swiss-Prot;Acc:P24604]		NULL	TRUE
Tir2-F12	NES16682478	5	73173346	G/A	GG			AA	ENSMUSG00000029217	ENSMUST00000113593	Tec-201	SYNONYMOUS_CODING	1			Tyrosine-protein kinase Tec (EC 2.7.10.2) [Source:UniProtKB/Swiss-Prot;Acc:P24604]		NULL	TRUE
Tir2-F12	NES16677054	5	73404688	C/G	CC	GG	GG	GG	ENSMUSG00000029219	ENSMUST00000031127	Slc10a4-001	3PRIME_UTR	<0.1			Sodium/bile acid cotransporter 4 (Na(+)/bile acid cotransporter 4)(Solute carrier family 10 member 4) [Source:UniProtKB/Swiss-Prot;Acc:Q3UEZ8]		NULL	TRUE
Tir2-F12	NES16677054	5	73404688	C/G	CC	GG	GG	GG	ENSMUSG00000081849	ENSMUST00000121417	AC108848.4-001	UPSTREAM	<0.1			No description		NULL	TRUE
Tir2-F12	NES16677065	5	73405110	C/T	CC	TT	TT		ENSMUSG00000029219	ENSMUST00000031127	Slc10a4-001	3PRIME_UTR	<0.1			Sodium/bile acid cotransporter 4 (Na(+)/bile acid cotransporter 4)(Solute carrier family 10 member 4) [Source:UniProtKB/Swiss-Prot;Acc:Q3UEZ8]		NULL	TRUE
Tir2-F12	NES16677065	5	73405110	C/T	CC	TT	TT		ENSMUSG00000081849	ENSMUST00000121417	AC108848.4-001	WITHIN_NON_CODING_GENE	<0.1			No description		NULL	TRUE
Tir2-F12	NES16677065	5	73405110	C/T	CC	TT	TT		ENSMUSG00000029219	ENSMUST00000031127	Slc10a4-001	3PRIME_UTR	<0.1			Sodium/bile acid cotransporter 4 (Na(+)/bile acid cotransporter 4)(Solute carrier family 10 member 4) [Source:UniProtKB/Swiss-Prot;Acc:Q3UEZ8]		NULL	TRUE
Tir2-F12	NES16677065	5	73405110	C/T	CC	TT	TT		ENSMUSG00000081849	ENSMUST00000121417	AC108848.4-001	WITHIN_NON_CODING_GENE	<0.1			No description		NULL	TRUE
Tir2-F12	NES16690827	5	73524502	C/A	CC	AA	AA	CC	ENSMUSG00000070733	ENSMUST00000094700	Fryl-202	5PRIME_UTR	0.995			furry homolog-like isoform 2 [Source:RefSeq peptide;Acc:NP_796110]		NULL	FALSE
Tir2-F12	NES16690827	5	73524502	C/A	CC	AA	AA	CC	ENSMUSG00000070733	ENSMUST00000101127	Fryl-001	SYNONYMOUS_CODING	0.995			furry homolog-like isoform 2 [Source:RefSeq peptide;Acc:NP_796110]		NULL	FALSE
Tir2-F12	NES16690827	5	73524502	C/A	CC	AA	AA	CC	ENSMUSG00000070733	ENSMUST00000042514	Fryl-201	SYNONYMOUS_CODING	0.995			furry homolog-like isoform 2 [Source:RefSeq peptide;Acc:NP_796110]		NULL	FALSE
Tir2-F12	NES16690827	5	73524502	C/A	CC	AA	AA	CC	ENSMUSG00000070733	ENSMUST00000094700	Fryl-202	5PRIME_UTR	0.995			furry homolog-like isoform 2 [Source:RefSeq peptide;Acc:NP_796110]		NULL	FALSE
Tir2-F12	NES16690827	5	73524502	C/A	CC	AA	AA	CC	ENSMUSG00000070733	ENSMUST00000101127	Fryl-001	SYNONYMOUS_CODING	0.995			furry homolog-like isoform 2 [Source:RefSeq peptide;Acc:NP_796110]		NULL	FALSE
Tir2-F12	NES16690827	5	73524502	C/A	CC	AA	AA	CC	ENSMUSG00000070733	ENSMUST00000042514	Fryl-201	SYNONYMOUS_CODING	0.995			furry homolog-like isoform 2 [Source:RefSeq peptide;Acc:NP_796110]		NULL	FALSE
Tir2-F12	NES16691999	5	73467921	G/A	GG		AA	AA	ENSMUSG00000070733	ENSMUST00000094700	Fryl-202	5PRIME_UTR	0.974			furry homolog-like isoform 2 [Source:RefSeq peptide;Acc:NP_796110]		NULL	TRUE
Tir2-F12	NES16692175	5	73461144	G/A	GG	AA			ENSMUSG00000070733	ENSMUST00000094700	Fryl-202	SYNONYMOUS_CODING	0.995			furry homolog-like isoform 2 [Source:RefSeq peptide;Acc:NP_796110]		NULL	TRUE
Tir2-F12	NES16692175	5	73461144	G/A	GG	AA			ENSMUSG00000070733	ENSMUST00000101127	Fryl-001	SYNONYMOUS_CODING	0.995			furry homolog-like isoform 2 [Source:RefSeq peptide;Acc:NP_796110]		NULL	TRUE
Tir2-F12	NES16692352	5	73456422	A/G	AA				ENSMUSG00000070733	ENSMUST00000094700	Fryl-202	SYNONYMOUS_CODING	1			furry homolog-like isoform 2 [Source:RefSeq peptide;Acc:NP_796110]		NULL	TRUE
Tir2-F12	NES16692352	5	73456422	A/G	AA				ENSMUSG00000070733	ENSMUST00000101127	Fryl-001	SYNONYMOUS_CODING	1			furry homolog-like isoform 2 [Source:RefSeq peptide;Acc:NP_796110]		NULL	TRUE
Tir2-F12	NES16692353	5	73456449	T/C	TT				ENSMUSG00000070733	ENSMUST00000094700	Fryl-202	SYNONYMOUS_CODING	0.281			furry homolog-like isoform 2 [Source:RefSeq peptide;Acc:NP_796110]		NULL	TRUE
Tir2-F12	NES16692353	5	73456449	T/C	TT				ENSMUSG00000070733	ENSMUST00000101127	Fryl-001	SYNONYMOUS_CODING	0.281			furry homolog-like isoform 2 [Source:RefSeq peptide;Acc:NP_796110]		NULL	TRUE
Tir2-F12	NES16692355	5	73456565	C/T	CC	TT			ENSMUSG00000070733	ENSMUST00000094700	Fryl-202	NON_SYNONYMOUS_CODING	0.475	benign	0.226	furry homolog-like isoform 2 [Source:RefSeq peptide;Acc:NP_796110]		6509	TRUE
Tir2-F12	NES16692355	5	73456565	C/T	CC	TT			ENSMUSG00000070733	ENSMUST00000101127	Fryl-001	NON_SYNONYMOUS_CODING	0.475			furry homolog-like isoform 2 [Source:RefSeq peptide;Acc:NP_796110]		6509	TRUE
Tir2-F12	NES16692677	5	73446767	A/G	AA	GG	GG		ENSMUSG00000070733	ENSMUST00000094700	Fryl-202	SYNONYMOUS_CODING	1			furry homolog-like isoform 2 [Source:RefSeq peptide;Acc:NP_796110]		NULL	TRUE
Tir2-F12	NES16692677	5	73446767	A/G	AA	GG	GG		ENSMUSG00000070733	ENSMUST00000101127	Fryl-001	SYNONYMOUS_CODING	1			furry homolog-like isoform 2 [Source:RefSeq peptide;Acc:NP_796110]		NULL	TRUE
Tir2-F12	NES16692680	5	73446914	A/G	AA	GG	GG	GG	ENSMUSG00000070733	ENSMUST00000094700	Fryl-202	SYNONYMOUS_CODING	0.879			furry homolog-like isoform 2 [Source:RefSeq peptide;Acc:NP_796110]		NULL	TRUE
Tir2-F12	NES16692680	5	73446914	A/G	AA	GG	GG	GG	ENSMUSG00000070733	ENSMUST00000101127	Fryl-001	SYNONYMOUS_CODING	0.879			furry homolog-like isoform 2 [Source:RefSeq peptide;Acc:NP_796110]		NULL	TRUE
Tir2-F12	NES16692762	5	73445417	A/G	AA	GG	GG	GG	ENSMUSG00000070733	ENSMUST00000094700	Fryl-202	SYNONYMOUS_CODING	0.999			furry homolog-like isoform 2 [Source:RefSeq peptide;Acc:NP_796110]		NULL	TRUE
Tir2-F12	NES16692762	5	73445417	A/G	AA	GG	GG	GG	ENSMUSG00000070733	ENSMUST00000101127	Fryl-001	SYNONYMOUS_CODING	0.999			furry homolog-like isoform 2 [Source:RefSeq peptide;Acc:NP_796110]		NULL	TRUE
Tir2-F12	NES16676699	5	73413308	T/C	TT	CC	CC		ENSMUSG00000081849	ENSMUST00000121417	AC108848.4-001	DOWNSTREAM	<0.1			No description		NULL	TRUE
Tir2-F12	NES16676699	5	73413308	T/C	TT	CC	CC		ENSMUSG00000070733	ENSMUST00000094700	Fryl-202	SYNONYMOUS_CODING	<0.1			furry homolog-like isoform 2 [Source:RefSeq peptide;Acc:NP_796110]		NULL	TRUE
Tir2-F12	NES16676699	5	73413308	T/C	TT	CC	CC		ENSMUSG00000070733	ENSMUST00000101127	Fryl-001	SYNONYMOUS_CODING	<0.1			furry homolog-like isoform 2 [Source:RefSeq peptide;Acc:NP_796110]		NULL	TRUE
Tir2-F12	NES16691999	5	73467921	G/A	GG		AA	AA	ENSMUSG00000070733	ENSMUST00000094700	Fryl-202	5PRIME_UTR	0.974			furry homolog-like isoform 2 [Source:RefSeq peptide;Acc:NP_796110]		NULL	TRUE
Tir2-F12	NES16687858	5	73704770	C/T	CC	TT	TT	TT	ENSMUSG00000029152	ENSMUST00000071081	Ociad1-202	3PRIME_UTR	1			OCIA domain-containing protein 1 [Source:UniProtKB/Swiss-Prot;Acc:Q9CRD0]		NULL	TRUE
Tir2-F12	NES16687858	5	73704770	C/T	CC	TT	TT	TT	ENSMUSG00000029152	ENSMUST00000031038	Ociad1-201	3PRIME_UTR	1			OCIA domain-containing protein 1 [Source:UniProtKB/Swiss-Prot;Acc:Q9CRD0]		NULL	TRUE
Tir2-F12	NES16687859	5	73704853	A/G	AA	GG	GG	GG	ENSMUSG00000029152	ENSMUST00000071081	Ociad1-202	3PRIME_UTR	0.903			OCIA domain-containing protein 1 [Source:UniProtKB/Swiss-Prot;Acc:Q9CRD0]		NULL	TRUE
Tir2-F12	NES16687859	5	73704853	A/G	AA	GG	GG	GG	ENSMUSG00000029152	ENSMUST00000031038	Ociad1-201	3PRIME_UTR	0.903			OCIA domain-containing protein 1 [Source:UniProtKB/Swiss-Prot;Acc:Q9CRD0]		NULL	TRUE
Tir2-F12	NES16687399	5	73727177	T/C	TT	CC	CC	CC	ENSMUSG00000029153	ENSMUST00000087195	Ociad2-001	5PRIME_UTR	<0.1			OCIA domain-containing protein 2 [Source:UniProtKB/Swiss-Prot;Acc:Q9D8W7]		NULL	TRUE
Tir2-F12	NES16687623	5	73714355	T/C	TT	CC	CC	CC	ENSMUSG00000029153	ENSMUST00000087195	Ociad2-001	3PRIME_UTR	<0.1			OCIA domain-containing protein 2 [Source:UniProtKB/Swiss-Prot;Acc:Q9D8W7]		NULL	TRUE
Tir2-F12	NES16687624	5	73714451	G/A	GG	AA	AA	GG	ENSMUSG00000029153	ENSMUST00000087195	Ociad2-001	3PRIME_UTR	<0.1			OCIA domain-containing protein 2 [Source:UniProtKB/Swiss-Prot;Acc:Q9D8W7]		NULL	FALSE
Tir2-F12	NES16687628	5	73715020	T/C	TT	CC	CC	CC	ENSMUSG00000029153	ENSMUST00000087195	Ociad2-001	SYNONYMOUS_CODING	0.991			OCIA domain-containing protein 2 [Source:UniProtKB/Swiss-Prot;Acc:Q9D8W7]		NULL	TRUE
Tir2-F12	NES16685619	5	73803122	T/C	TT	CC	CC	TT	ENSMUSG00000029154	ENSMUST00000065543	AC134551.2-002	SYNONYMOUS_CODING	0.367			PGAP2-interacting protein [Source:UniProtKB/Swiss-Prot;Acc:Q91YL7]		NULL	FALSE
Tir2-F12	NES16685619	5	73803122	T/C	TT	CC	CC	TT	ENSMUSG00000029154	ENSMUST00000031040	AC134551.2-001	SYNONYMOUS_CODING	0.367			PGAP2-interacting protein [Source:UniProtKB/Swiss-Prot;Acc:Q91YL7]		NULL	FALSE
Tir2-F12	NES16685620	5	73803165	C/T	CC	TT	TT	CC	ENSMUSG00000029154	ENSMUST00000065543	AC134551.2-002	SYNONYMOUS_CODING	0.657			PGAP2-interacting protein [Source:UniProtKB/Swiss-Prot;Acc:Q91YL7]		NULL	FALSE
Tir2-F12	NES16685620	5	73803165	C/T	CC	TT	TT	CC	ENSMUSG00000029154	ENSMUST00000031040	AC134551.2-001	SYNONYMOUS_CODING	0.657			PGAP2-interacting protein [Source:UniProtKB/Swiss-Prot;Acc:Q91YL7]		NULL	FALSE
Tir2-F12	NES16685599	5	73804357	A/G	AA	GG	GG	AA	ENSMUSG00000029154	ENSMUST00000065543	AC134551.2-002	SYNONYMOUS_CODING	0.997			PGAP2-interacting protein [Source:UniProtKB/Swiss-Prot;Acc:Q91YL7]		NULL	FALSE
Tir2-F12	NES16685599	5	73804357	A/G	AA	GG	GG	AA	ENSMUSG00000029154	ENSMUST00000031040	AC134551.2-001	SYNONYMOUS_CODING	0.997			PGAP2-interacting protein [Source:UniProtKB/Swiss-Prot;Acc:Q91YL7]		NULL	FALSE
Tir2-F12	NES13836328	5	73819814	A/G	AA	GG	GG	AA	ENSMUSG00000029154	ENSMUST00000065543	AC134551.2-002	SYNONYMOUS_CODING	0.127			PGAP2-interacting protein [Source:UniProtKB/Swiss-Prot;Acc:Q91YL7]		NULL	FALSE
Tir2-F12	NES13836328	5	73819814	A/G	AA	GG	GG	AA	ENSMUSG00000029154	ENSMUST00000031040	AC134551.2-001	SYNONYMOUS_CODING	0.127			PGAP2-interacting protein [Source:UniProtKB/Swiss-Prot;Acc:Q91YL7]		NULL	FALSE
Tir2-F12	NES13836329	5	73819826	T/G	TT	GG	GG	TT	ENSMUSG00000029154	ENSMUST00000065543	AC134551.2-002	SYNONYMOUS_CODING	0.979			PGAP2-interacting protein [Source:UniProtKB/Swiss-Prot;Acc:Q91YL7]		NULL	FALSE
Tir2-F12	NES13836329	5	73819826	T/G	TT	GG	GG	TT	ENSMUSG00000029154	ENSMUST00000031040	AC134551.2-001	SYNONYMOUS_CODING	0.979			PGAP2-interacting protein [Source:UniProtKB/Swiss-Prot;Acc:Q91YL7]		NULL	FALSE
Tir2-F12	NES13836098	5	73825499	G/T	GG	TT	TT	GG	ENSMUSG00000029154	ENSMUST00000065543	AC134551.2-002	SYNONYMOUS_CODING	0.993			PGAP2-interacting protein [Source:UniProtKB/Swiss-Prot;Acc:Q91YL7]		NULL	FALSE
Tir2-F12	NES13836098	5	73825499	G/T	GG	TT	TT	GG	ENSMUSG00000029154	ENSMUST00000031040	AC134551.2-001	SYNONYMOUS_CODING	0.993			PGAP2-interacting protein [Source:UniProtKB/Swiss-Prot;Acc:Q91YL7]		NULL	FALSE
Tir2-F12	NES13836100	5	73825562	C/T	CC	TT	TT	CC	ENSMUSG00000029154	ENSMUST00000065543	AC134551.2-002	SYNONYMOUS_CODING	0.997			PGAP2-interacting protein [Source:UniProtKB/Swiss-Prot;Acc:Q91YL7]		NULL	FALSE
Tir2-F12	NES13836100	5	73825562	C/T	CC	TT	TT	CC	ENSMUSG00000029154	ENSMUST00000031040	AC134551.2-001	SYNONYMOUS_CODING	0.997			PGAP2-interacting protein [Source:UniProtKB/Swiss-Prot;Acc:Q91YL7]		NULL	FALSE
Tir2-F12	NES13840709	5	73950993	C/T	CC	TT	TT	CC	ENSMUSG00000051674	ENSMUST00000087181	Dcun1d4-002	3PRIME_UTR	0.94			DCN1-like protein 4 (Defective in cullin neddylation protein 1-like protein 4)(DCUN1 domain-containing protein 4) [Source:UniProtKB/Swiss-Prot;Acc:Q8CCA0]		NULL	FALSE
Tir2-F12	NES13840709	5	73950993	C/T	CC	TT	TT	CC	ENSMUSG00000051674	ENSMUST00000113558	Dcun1d4-003	3PRIME_UTR	0.94			DCN1-like protein 4 (Defective in cullin neddylation protein 1-like protein 4)(DCUN1 domain-containing protein 4) [Source:UniProtKB/Swiss-Prot;Acc:Q8CCA0]		NULL	FALSE
Tir2-F12	NES13840709	5	73950993	C/T	CC	TT	TT	CC	ENSMUSG00000051674	ENSMUST00000063882	Dcun1d4-001	3PRIME_UTR	0.94			DCN1-like protein 4 (Defective in cullin neddylation protein 1-like protein 4)(DCUN1 domain-containing protein 4) [Source:UniProtKB/Swiss-Prot;Acc:Q8CCA0]		NULL	FALSE
Tir2-F12	NES13840709	5	73950993	C/T	CC	TT	TT	CC	ENSMUSG00000051674	ENSMUST00000087181	Dcun1d4-002	3PRIME_UTR	0.94			DCN1-like protein 4 (Defective in cullin neddylation protein 1-like protein 4)(DCUN1 domain-containing protein 4) [Source:UniProtKB/Swiss-Prot;Acc:Q8CCA0]		NULL	FALSE
Tir2-F12	NES13840709	5	73950993	C/T	CC	TT	TT	CC	ENSMUSG00000051674	ENSMUST00000113558	Dcun1d4-003	3PRIME_UTR	0.94			DCN1-like protein 4 (Defective in cullin neddylation protein 1-like protein 4)(DCUN1 domain-containing protein 4) [Source:UniProtKB/Swiss-Prot;Acc:Q8CCA0]		NULL	FALSE
Tir2-F12	NES13840709	5	73950993	C/T	CC	TT	TT	CC	ENSMUSG00000051674	ENSMUST00000063882	Dcun1d4-001	3PRIME_UTR	0.94			DCN1-like protein 4 (Defective in cullin neddylation protein 1-like protein 4)(DCUN1 domain-containing protein 4) [Source:UniProtKB/Swiss-Prot;Acc:Q8CCA0]		NULL	FALSE
Tir2-F12	NES13838967	5	74020807	C/T	CC	TT	TT	CC	ENSMUSG00000067206	ENSMUST00000087177	Lrrc66-001	SYNONYMOUS_CODING	0.829			Leucine-rich repeat-containing protein 66 [Source:UniProtKB/Swiss-Prot;Acc:Q8K0B3]		NULL	FALSE
Tir2-F12	NES13838968	5	74020891	C/A	CC	AA	AA		ENSMUSG00000067206	ENSMUST00000087177	Lrrc66-001	SYNONYMOUS_CODING	<0.1			Leucine-rich repeat-containing protein 66 [Source:UniProtKB/Swiss-Prot;Acc:Q8K0B3]		NULL	TRUE
Tir2-F12	NES13839572	5	74002149	C/T	CC	TT	TT	CC	ENSMUSG00000067206	ENSMUST00000087177	Lrrc66-001	SYNONYMOUS_CODING	<0.1			Leucine-rich repeat-containing protein 66 [Source:UniProtKB/Swiss-Prot;Acc:Q8K0B3]		NULL	FALSE
Tir2-F12	NES13839666	5	73998838	G/A	GG	AA	AA	AA	ENSMUSG00000067206	ENSMUST00000087177	Lrrc66-001	SYNONYMOUS_CODING	0.884			Leucine-rich repeat-containing protein 66 [Source:UniProtKB/Swiss-Prot;Acc:Q8K0B3]		NULL	TRUE
Tir2-F12	NES13839668	5	73998908	C/T	CC	TT	TT	TT	ENSMUSG00000067206	ENSMUST00000087177	Lrrc66-001	NON_SYNONYMOUS_CODING	<0.1	possibly damaging	1.631	Leucine-rich repeat-containing protein 66 [Source:UniProtKB/Swiss-Prot;Acc:Q8K0B3]		2073	TRUE
Tir2-F12	NES13839670	5	73999043	G/A	GG	AA	AA	AA	ENSMUSG00000067206	ENSMUST00000087177	Lrrc66-001	NON_SYNONYMOUS_CODING	<0.1	benign	1.208	Leucine-rich repeat-containing protein 66 [Source:UniProtKB/Swiss-Prot;Acc:Q8K0B3]		1938	TRUE
Tir2-F12	NES13839673	5	73999155	T/G	TT	GG	GG	GG	ENSMUSG00000067206	ENSMUST00000087177	Lrrc66-001	SYNONYMOUS_CODING	<0.1			Leucine-rich repeat-containing protein 66 [Source:UniProtKB/Swiss-Prot;Acc:Q8K0B3]		NULL	TRUE
Tir2-F12	NES13839676	5	73999297	G/A	GG	AA	AA	AA	ENSMUSG00000067206	ENSMUST00000087177	Lrrc66-001	SYNONYMOUS_CODING	<0.1			Leucine-rich repeat-containing protein 66 [Source:UniProtKB/Swiss-Prot;Acc:Q8K0B3]		NULL	TRUE
Tir2-F12	NES13839693	5	73999640	C/T	CC	TT	TT	CC	ENSMUSG00000067206	ENSMUST00000087177	Lrrc66-001	NON_SYNONYMOUS_CODING	<0.1	benign	0.074	Leucine-rich repeat-containing protein 66 [Source:UniProtKB/Swiss-Prot;Acc:Q8K0B3]		1341	FALSE
Tir2-F12	NES13839696	5	73999810	C/T	CC	TT	TT	CC	ENSMUSG00000067206	ENSMUST00000087177	Lrrc66-001	SYNONYMOUS_CODING	0.98			Leucine-rich repeat-containing protein 66 [Source:UniProtKB/Swiss-Prot;Acc:Q8K0B3]		NULL	FALSE
Tir2-F12	NES13839699	5	73999896	C/T	CC	TT	TT	TT	ENSMUSG00000067206	ENSMUST00000087177	Lrrc66-001	NON_SYNONYMOUS_CODING	<0.1	benign	0.055	Leucine-rich repeat-containing protein 66 [Source:UniProtKB/Swiss-Prot;Acc:Q8K0B3]		1085	TRUE
Tir2-F12	NES13839702	5	74000065	T/C	TT	CC	CC	TT	ENSMUSG00000067206	ENSMUST00000087177	Lrrc66-001	SYNONYMOUS_CODING	<0.1			Leucine-rich repeat-containing protein 66 [Source:UniProtKB/Swiss-Prot;Acc:Q8K0B3]		NULL	FALSE
Tir2-F12	NES13837934	5	74063598	G/A	GG	AA	AA		ENSMUSG00000029155	ENSMUST00000041422	Spata18-201	NON_SYNONYMOUS_CODING	1	benign	0.247	spermatogenesis associated 18 homolog [Source:RefSeq peptide;Acc:NP_848474]		368	TRUE
Tir2-F12	NES13837934	5	74063598	G/A	GG	AA	AA		ENSMUSG00000029155	ENSMUST00000113548	Spata18-203	NON_SYNONYMOUS_CODING	1			spermatogenesis associated 18 homolog [Source:RefSeq peptide;Acc:NP_848474]		286	TRUE
Tir2-F12	NES13838073	5	74060693	A/G	AA	GG			ENSMUSG00000029155	ENSMUST00000041422	Spata18-201	SYNONYMOUS_CODING	0.961			spermatogenesis associated 18 homolog [Source:RefSeq peptide;Acc:NP_848474]		NULL	TRUE
Tir2-F12	NES13838073	5	74060693	A/G	AA	GG			ENSMUSG00000029155	ENSMUST00000113548	Spata18-203	SYNONYMOUS_CODING	0.961			spermatogenesis associated 18 homolog [Source:RefSeq peptide;Acc:NP_848474]		NULL	TRUE
Tir2-F12	NES13838073	5	74060693	A/G	AA	GG			ENSMUSG00000029155	ENSMUST00000071077	Spata18-202	UPSTREAM	0.961			spermatogenesis associated 18 homolog [Source:RefSeq peptide;Acc:NP_848474]		NULL	TRUE
Tir2-F6	NES10462487	5	72655710	T/C	TT	CC	CC	CC	ENSMUSG00000046808	ENSMUST00000094710	Atp10d-201	SYNONYMOUS_CODING	0.997			Probable phospholipid-transporting ATPase VD (ATPVD)(EC 3.6.3.1)(ATPase class V type 10D) [Source:UniProtKB/Swiss-Prot;Acc:Q8K2X1]		NULL	TRUE
Tir2-F6	NES10453359	5	72995060	T/C	TT			TT	ENSMUSG00000067220	ENSMUST00000087213	Cnga1-001	3PRIME_UTR	<0.1			cGMP-gated cation channel alpha-1 (CNG channel alpha-1)(CNG-1)(CNG1)(Cyclic nucleotide-gated channel alpha-1)(Cyclic nucleotide-gated channel, photoreceptor)(Cyclic nucleotide-gated cation channel 1)(Rod photoreceptor cGMP-gated channel subunit alpha		NULL	FALSE
Tir2-F6	NES16682477	5	73173256	C/T	CC		TT	TT	ENSMUSG00000029217	ENSMUST00000073843	Tec-005	SYNONYMOUS_CODING	0.949			Tyrosine-protein kinase Tec (EC 2.7.10.2) [Source:UniProtKB/Swiss-Prot;Acc:P24604]		NULL	TRUE
Tir2-F6	NES16682477	5	73173256	C/T	CC		TT	TT	ENSMUSG00000029217	ENSMUST00000071944	Tec-001	SYNONYMOUS_CODING	0.949			Tyrosine-protein kinase Tec (EC 2.7.10.2) [Source:UniProtKB/Swiss-Prot;Acc:P24604]		NULL	TRUE
Tir2-F6	NES16682477	5	73173256	C/T	CC		TT	TT	ENSMUSG00000029217	ENSMUST00000113594	Tec-002	SYNONYMOUS_CODING	0.949			Tyrosine-protein kinase Tec (EC 2.7.10.2) [Source:UniProtKB/Swiss-Prot;Acc:P24604]		NULL	TRUE
Tir2-F6	NES16682477	5	73173256	C/T	CC		TT	TT	ENSMUSG00000029217	ENSMUST00000113593	Tec-201	SYNONYMOUS_CODING	0.949			Tyrosine-protein kinase Tec (EC 2.7.10.2) [Source:UniProtKB/Swiss-Prot;Acc:P24604]		NULL	TRUE
Tir2-F6	NES16682478	5	73173346	G/A	GG			AA	ENSMUSG00000029217	ENSMUST00000073843	Tec-005	SYNONYMOUS_CODING	1			Tyrosine-protein kinase Tec (EC 2.7.10.2) [Source:UniProtKB/Swiss-Prot;Acc:P24604]		NULL	TRUE
Tir2-F6	NES16682478	5	73173346	G/A	GG			AA	ENSMUSG00000029217	ENSMUST00000071944	Tec-001	SYNONYMOUS_CODING	1			Tyrosine-protein kinase Tec (EC 2.7.10.2) [Source:UniProtKB/Swiss-Prot;Acc:P24604]		NULL	TRUE
Tir2-F6	NES16682478	5	73173346	G/A	GG			AA	ENSMUSG00000029217	ENSMUST00000113594	Tec-002	SYNONYMOUS_CODING	1			Tyrosine-protein kinase Tec (EC 2.7.10.2) [Source:UniProtKB/Swiss-Prot;Acc:P24604]		NULL	TRUE
Tir2-F6	NES16682478	5	73173346	G/A	GG			AA	ENSMUSG00000029217	ENSMUST00000113593	Tec-201	SYNONYMOUS_CODING	1			Tyrosine-protein kinase Tec (EC 2.7.10.2) [Source:UniProtKB/Swiss-Prot;Acc:P24604]		NULL	TRUE
Tir2-F6	NES16677054	5	73404688	C/G	CC	GG	GG	GG	ENSMUSG00000029219	ENSMUST00000031127	Slc10a4-001	3PRIME_UTR	<0.1			Sodium/bile acid cotransporter 4 (Na(+)/bile acid cotransporter 4)(Solute carrier family 10 member 4) [Source:UniProtKB/Swiss-Prot;Acc:Q3UEZ8]		NULL	TRUE
Tir2-F6	NES16677054	5	73404688	C/G	CC	GG	GG	GG	ENSMUSG00000081849	ENSMUST00000121417	AC108848.4-001	UPSTREAM	<0.1			No description		NULL	TRUE
Tir2-F6	NES16677065	5	73405110	C/T	CC	TT	TT		ENSMUSG00000029219	ENSMUST00000031127	Slc10a4-001	3PRIME_UTR	<0.1			Sodium/bile acid cotransporter 4 (Na(+)/bile acid cotransporter 4)(Solute carrier family 10 member 4) [Source:UniProtKB/Swiss-Prot;Acc:Q3UEZ8]		NULL	TRUE
Tir2-F6	NES16677065	5	73405110	C/T	CC	TT	TT		ENSMUSG00000081849	ENSMUST00000121417	AC108848.4-001	WITHIN_NON_CODING_GENE	<0.1			No description		NULL	TRUE
Tir2-F6	NES16677065	5	73405110	C/T	CC	TT	TT		ENSMUSG00000029219	ENSMUST00000031127	Slc10a4-001	3PRIME_UTR	<0.1			Sodium/bile acid cotransporter 4 (Na(+)/bile acid cotransporter 4)(Solute carrier family 10 member 4) [Source:UniProtKB/Swiss-Prot;Acc:Q3UEZ8]		NULL	TRUE
Tir2-F6	NES16677065	5	73405110	C/T	CC	TT	TT		ENSMUSG00000081849	ENSMUST00000121417	AC108848.4-001	WITHIN_NON_CODING_GENE	<0.1			No description		NULL	TRUE
Tir2-F6	NES16690827	5	73524502	C/A	CC	AA	AA	CC	ENSMUSG00000070733	ENSMUST00000094700	Fryl-202	5PRIME_UTR	0.995			furry homolog-like isoform 2 [Source:RefSeq peptide;Acc:NP_796110]		NULL	FALSE
Tir2-F6	NES16690827	5	73524502	C/A	CC	AA	AA	CC	ENSMUSG00000070733	ENSMUST00000101127	Fryl-001	SYNONYMOUS_CODING	0.995			furry homolog-like isoform 2 [Source:RefSeq peptide;Acc:NP_796110]		NULL	FALSE
Tir2-F6	NES16690827	5	73524502	C/A	CC	AA	AA	CC	ENSMUSG00000070733	ENSMUST00000042514	Fryl-201	SYNONYMOUS_CODING	0.995			furry homolog-like isoform 2 [Source:RefSeq peptide;Acc:NP_796110]		NULL	FALSE
Tir2-F6	NES16690827	5	73524502	C/A	CC	AA	AA	CC	ENSMUSG00000070733	ENSMUST00000094700	Fryl-202	5PRIME_UTR	0.995			furry homolog-like isoform 2 [Source:RefSeq peptide;Acc:NP_796110]		NULL	FALSE
Tir2-F6	NES16690827	5	73524502	C/A	CC	AA	AA	CC	ENSMUSG00000070733	ENSMUST00000101127	Fryl-001	SYNONYMOUS_CODING	0.995			furry homolog-like isoform 2 [Source:RefSeq peptide;Acc:NP_796110]		NULL	FALSE
Tir2-F6	NES16690827	5	73524502	C/A	CC	AA	AA	CC	ENSMUSG00000070733	ENSMUST00000042514	Fryl-201	SYNONYMOUS_CODING	0.995			furry homolog-like isoform 2 [Source:RefSeq peptide;Acc:NP_796110]		NULL	FALSE
Tir2-F6	NES16691999	5	73467921	G/A	GG		AA	AA	ENSMUSG00000070733	ENSMUST00000094700	Fryl-202	5PRIME_UTR	0.974			furry homolog-like isoform 2 [Source:RefSeq peptide;Acc:NP_796110]		NULL	TRUE
Tir2-F6	NES16692175	5	73461144	G/A	GG	AA			ENSMUSG00000070733	ENSMUST00000094700	Fryl-202	SYNONYMOUS_CODING	0.995			furry homolog-like isoform 2 [Source:RefSeq peptide;Acc:NP_796110]		NULL	TRUE
Tir2-F6	NES16692175	5	73461144	G/A	GG	AA			ENSMUSG00000070733	ENSMUST00000101127	Fryl-001	SYNONYMOUS_CODING	0.995			furry homolog-like isoform 2 [Source:RefSeq peptide;Acc:NP_796110]		NULL	TRUE
Tir2-F6	NES16692352	5	73456422	A/G	AA				ENSMUSG00000070733	ENSMUST00000094700	Fryl-202	SYNONYMOUS_CODING	1			furry homolog-like isoform 2 [Source:RefSeq peptide;Acc:NP_796110]		NULL	TRUE
Tir2-F6	NES16692352	5	73456422	A/G	AA				ENSMUSG00000070733	ENSMUST00000101127	Fryl-001	SYNONYMOUS_CODING	1			furry homolog-like isoform 2 [Source:RefSeq peptide;Acc:NP_796110]		NULL	TRUE
Tir2-F6	NES16692353	5	73456449	T/C	TT				ENSMUSG00000070733	ENSMUST00000094700	Fryl-202	SYNONYMOUS_CODING	0.281			furry homolog-like isoform 2 [Source:RefSeq peptide;Acc:NP_796110]		NULL	TRUE
Tir2-F6	NES16692353	5	73456449	T/C	TT				ENSMUSG00000070733	ENSMUST00000101127	Fryl-001	SYNONYMOUS_CODING	0.281			furry homolog-like isoform 2 [Source:RefSeq peptide;Acc:NP_796110]		NULL	TRUE
Tir2-F6	NES16692355	5	73456565	C/T	CC	TT			ENSMUSG00000070733	ENSMUST00000094700	Fryl-202	NON_SYNONYMOUS_CODING	0.475	benign	0.226	furry homolog-like isoform 2 [Source:RefSeq peptide;Acc:NP_796110]		6509	TRUE
Tir2-F6	NES16692355	5	73456565	C/T	CC	TT			ENSMUSG00000070733	ENSMUST00000101127	Fryl-001	NON_SYNONYMOUS_CODING	0.475			furry homolog-like isoform 2 [Source:RefSeq peptide;Acc:NP_796110]		6509	TRUE
Tir2-F6	NES16692677	5	73446767	A/G	AA	GG	GG		ENSMUSG00000070733	ENSMUST00000094700	Fryl-202	SYNONYMOUS_CODING	1			furry homolog-like isoform 2 [Source:RefSeq peptide;Acc:NP_796110]		NULL	TRUE
Tir2-F6	NES16692677	5	73446767	A/G	AA	GG	GG		ENSMUSG00000070733	ENSMUST00000101127	Fryl-001	SYNONYMOUS_CODING	1			furry homolog-like isoform 2 [Source:RefSeq peptide;Acc:NP_796110]		NULL	TRUE
Tir2-F6	NES16692680	5	73446914	A/G	AA	GG	GG	GG	ENSMUSG00000070733	ENSMUST00000094700	Fryl-202	SYNONYMOUS_CODING	0.879			furry homolog-like isoform 2 [Source:RefSeq peptide;Acc:NP_796110]		NULL	TRUE
Tir2-F6	NES16692680	5	73446914	A/G	AA	GG	GG	GG	ENSMUSG00000070733	ENSMUST00000101127	Fryl-001	SYNONYMOUS_CODING	0.879			furry homolog-like isoform 2 [Source:RefSeq peptide;Acc:NP_796110]		NULL	TRUE
Tir2-F6	NES16692762	5	73445417	A/G	AA	GG	GG	GG	ENSMUSG00000070733	ENSMUST00000094700	Fryl-202	SYNONYMOUS_CODING	0.999			furry homolog-like isoform 2 [Source:RefSeq peptide;Acc:NP_796110]		NULL	TRUE
Tir2-F6	NES16692762	5	73445417	A/G	AA	GG	GG	GG	ENSMUSG00000070733	ENSMUST00000101127	Fryl-001	SYNONYMOUS_CODING	0.999			furry homolog-like isoform 2 [Source:RefSeq peptide;Acc:NP_796110]		NULL	TRUE
Tir2-F6	NES16676699	5	73413308	T/C	TT	CC	CC		ENSMUSG00000081849	ENSMUST00000121417	AC108848.4-001	DOWNSTREAM	<0.1			No description		NULL	TRUE
Tir2-F6	NES16676699	5	73413308	T/C	TT	CC	CC		ENSMUSG00000070733	ENSMUST00000094700	Fryl-202	SYNONYMOUS_CODING	<0.1			furry homolog-like isoform 2 [Source:RefSeq peptide;Acc:NP_796110]		NULL	TRUE
Tir2-F6	NES16676699	5	73413308	T/C	TT	CC	CC		ENSMUSG00000070733	ENSMUST00000101127	Fryl-001	SYNONYMOUS_CODING	<0.1			furry homolog-like isoform 2 [Source:RefSeq peptide;Acc:NP_796110]		NULL	TRUE
Tir2-F6	NES16691999	5	73467921	G/A	GG		AA	AA	ENSMUSG00000070733	ENSMUST00000094700	Fryl-202	5PRIME_UTR	0.974			furry homolog-like isoform 2 [Source:RefSeq peptide;Acc:NP_796110]		NULL	TRUE
Tir2-F6	NES16687858	5	73704770	C/T	CC	TT	TT	TT	ENSMUSG00000029152	ENSMUST00000071081	Ociad1-202	3PRIME_UTR	1			OCIA domain-containing protein 1 [Source:UniProtKB/Swiss-Prot;Acc:Q9CRD0]		NULL	TRUE
Tir2-F6	NES16687858	5	73704770	C/T	CC	TT	TT	TT	ENSMUSG00000029152	ENSMUST00000031038	Ociad1-201	3PRIME_UTR	1			OCIA domain-containing protein 1 [Source:UniProtKB/Swiss-Prot;Acc:Q9CRD0]		NULL	TRUE
Tir2-F6	NES16687859	5	73704853	A/G	AA	GG	GG	GG	ENSMUSG00000029152	ENSMUST00000071081	Ociad1-202	3PRIME_UTR	0.903			OCIA domain-containing protein 1 [Source:UniProtKB/Swiss-Prot;Acc:Q9CRD0]		NULL	TRUE
Tir2-F6	NES16687859	5	73704853	A/G	AA	GG	GG	GG	ENSMUSG00000029152	ENSMUST00000031038	Ociad1-201	3PRIME_UTR	0.903			OCIA domain-containing protein 1 [Source:UniProtKB/Swiss-Prot;Acc:Q9CRD0]		NULL	TRUE
Tir2-F6	NES16687399	5	73727177	T/C	TT	CC	CC	CC	ENSMUSG00000029153	ENSMUST00000087195	Ociad2-001	5PRIME_UTR	<0.1			OCIA domain-containing protein 2 [Source:UniProtKB/Swiss-Prot;Acc:Q9D8W7]		NULL	TRUE
Tir2-F6	NES16687623	5	73714355	T/C	TT	CC	CC	CC	ENSMUSG00000029153	ENSMUST00000087195	Ociad2-001	3PRIME_UTR	<0.1			OCIA domain-containing protein 2 [Source:UniProtKB/Swiss-Prot;Acc:Q9D8W7]		NULL	TRUE
Tir2-F6	NES16687624	5	73714451	G/A	GG	AA	AA	GG	ENSMUSG00000029153	ENSMUST00000087195	Ociad2-001	3PRIME_UTR	<0.1			OCIA domain-containing protein 2 [Source:UniProtKB/Swiss-Prot;Acc:Q9D8W7]		NULL	FALSE
Tir2-F6	NES16687628	5	73715020	T/C	TT	CC	CC	CC	ENSMUSG00000029153	ENSMUST00000087195	Ociad2-001	SYNONYMOUS_CODING	0.991			OCIA domain-containing protein 2 [Source:UniProtKB/Swiss-Prot;Acc:Q9D8W7]		NULL	TRUE
Tir2-F6	NES16685619	5	73803122	T/C	TT	CC	CC	TT	ENSMUSG00000029154	ENSMUST00000065543	AC134551.2-002	SYNONYMOUS_CODING	0.367			PGAP2-interacting protein [Source:UniProtKB/Swiss-Prot;Acc:Q91YL7]		NULL	FALSE
Tir2-F6	NES16685619	5	73803122	T/C	TT	CC	CC	TT	ENSMUSG00000029154	ENSMUST00000031040	AC134551.2-001	SYNONYMOUS_CODING	0.367			PGAP2-interacting protein [Source:UniProtKB/Swiss-Prot;Acc:Q91YL7]		NULL	FALSE
Tir2-F6	NES16685620	5	73803165	C/T	CC	TT	TT	CC	ENSMUSG00000029154	ENSMUST00000065543	AC134551.2-002	SYNONYMOUS_CODING	0.657			PGAP2-interacting protein [Source:UniProtKB/Swiss-Prot;Acc:Q91YL7]		NULL	FALSE
Tir2-F6	NES16685620	5	73803165	C/T	CC	TT	TT	CC	ENSMUSG00000029154	ENSMUST00000031040	AC134551.2-001	SYNONYMOUS_CODING	0.657			PGAP2-interacting protein [Source:UniProtKB/Swiss-Prot;Acc:Q91YL7]		NULL	FALSE
Tir2-F6	NES16685599	5	73804357	A/G	AA	GG	GG	AA	ENSMUSG00000029154	ENSMUST00000065543	AC134551.2-002	SYNONYMOUS_CODING	0.997			PGAP2-interacting protein [Source:UniProtKB/Swiss-Prot;Acc:Q91YL7]		NULL	FALSE
Tir2-F6	NES16685599	5	73804357	A/G	AA	GG	GG	AA	ENSMUSG00000029154	ENSMUST00000031040	AC134551.2-001	SYNONYMOUS_CODING	0.997			PGAP2-interacting protein [Source:UniProtKB/Swiss-Prot;Acc:Q91YL7]		NULL	FALSE
Tir2-F6	NES13836328	5	73819814	A/G	AA	GG	GG	AA	ENSMUSG00000029154	ENSMUST00000065543	AC134551.2-002	SYNONYMOUS_CODING	0.127			PGAP2-interacting protein [Source:UniProtKB/Swiss-Prot;Acc:Q91YL7]		NULL	FALSE
Tir2-F6	NES13836328	5	73819814	A/G	AA	GG	GG	AA	ENSMUSG00000029154	ENSMUST00000031040	AC134551.2-001	SYNONYMOUS_CODING	0.127			PGAP2-interacting protein [Source:UniProtKB/Swiss-Prot;Acc:Q91YL7]		NULL	FALSE
Tir2-F6	NES13836329	5	73819826	T/G	TT	GG	GG	TT	ENSMUSG00000029154	ENSMUST00000065543	AC134551.2-002	SYNONYMOUS_CODING	0.979			PGAP2-interacting protein [Source:UniProtKB/Swiss-Prot;Acc:Q91YL7]		NULL	FALSE
Tir2-F6	NES13836329	5	73819826	T/G	TT	GG	GG	TT	ENSMUSG00000029154	ENSMUST00000031040	AC134551.2-001	SYNONYMOUS_CODING	0.979			PGAP2-interacting protein [Source:UniProtKB/Swiss-Prot;Acc:Q91YL7]		NULL	FALSE
Tir2-F6	NES13836098	5	73825499	G/T	GG	TT	TT	GG	ENSMUSG00000029154	ENSMUST00000065543	AC134551.2-002	SYNONYMOUS_CODING	0.993			PGAP2-interacting protein [Source:UniProtKB/Swiss-Prot;Acc:Q91YL7]		NULL	FALSE
Tir2-F6	NES13836098	5	73825499	G/T	GG	TT	TT	GG	ENSMUSG00000029154	ENSMUST00000031040	AC134551.2-001	SYNONYMOUS_CODING	0.993			PGAP2-interacting protein [Source:UniProtKB/Swiss-Prot;Acc:Q91YL7]		NULL	FALSE
Tir2-F6	NES13836100	5	73825562	C/T	CC	TT	TT	CC	ENSMUSG00000029154	ENSMUST00000065543	AC134551.2-002	SYNONYMOUS_CODING	0.997			PGAP2-interacting protein [Source:UniProtKB/Swiss-Prot;Acc:Q91YL7]		NULL	FALSE
Tir2-F6	NES13836100	5	73825562	C/T	CC	TT	TT	CC	ENSMUSG00000029154	ENSMUST00000031040	AC134551.2-001	SYNONYMOUS_CODING	0.997			PGAP2-interacting protein [Source:UniProtKB/Swiss-Prot;Acc:Q91YL7]		NULL	FALSE
Tir2-F6	NES13840709	5	73950993	C/T	CC	TT	TT	CC	ENSMUSG00000051674	ENSMUST00000087181	Dcun1d4-002	3PRIME_UTR	0.94			DCN1-like protein 4 (Defective in cullin neddylation protein 1-like protein 4)(DCUN1 domain-containing protein 4) [Source:UniProtKB/Swiss-Prot;Acc:Q8CCA0]		NULL	FALSE
Tir2-F6	NES13840709	5	73950993	C/T	CC	TT	TT	CC	ENSMUSG00000051674	ENSMUST00000113558	Dcun1d4-003	3PRIME_UTR	0.94			DCN1-like protein 4 (Defective in cullin neddylation protein 1-like protein 4)(DCUN1 domain-containing protein 4) [Source:UniProtKB/Swiss-Prot;Acc:Q8CCA0]		NULL	FALSE
Tir2-F6	NES13840709	5	73950993	C/T	CC	TT	TT	CC	ENSMUSG00000051674	ENSMUST00000063882	Dcun1d4-001	3PRIME_UTR	0.94			DCN1-like protein 4 (Defective in cullin neddylation protein 1-like protein 4)(DCUN1 domain-containing protein 4) [Source:UniProtKB/Swiss-Prot;Acc:Q8CCA0]		NULL	FALSE
Tir2-F6	NES13840709	5	73950993	C/T	CC	TT	TT	CC	ENSMUSG00000051674	ENSMUST00000087181	Dcun1d4-002	3PRIME_UTR	0.94			DCN1-like protein 4 (Defective in cullin neddylation protein 1-like protein 4)(DCUN1 domain-containing protein 4) [Source:UniProtKB/Swiss-Prot;Acc:Q8CCA0]		NULL	FALSE
Tir2-F6	NES13840709	5	73950993	C/T	CC	TT	TT	CC	ENSMUSG00000051674	ENSMUST00000113558	Dcun1d4-003	3PRIME_UTR	0.94			DCN1-like protein 4 (Defective in cullin neddylation protein 1-like protein 4)(DCUN1 domain-containing protein 4) [Source:UniProtKB/Swiss-Prot;Acc:Q8CCA0]		NULL	FALSE
Tir2-F6	NES13840709	5	73950993	C/T	CC	TT	TT	CC	ENSMUSG00000051674	ENSMUST00000063882	Dcun1d4-001	3PRIME_UTR	0.94			DCN1-like protein 4 (Defective in cullin neddylation protein 1-like protein 4)(DCUN1 domain-containing protein 4) [Source:UniProtKB/Swiss-Prot;Acc:Q8CCA0]		NULL	FALSE
Tir2-F6	NES13838967	5	74020807	C/T	CC	TT	TT	CC	ENSMUSG00000067206	ENSMUST00000087177	Lrrc66-001	SYNONYMOUS_CODING	0.829			Leucine-rich repeat-containing protein 66 [Source:UniProtKB/Swiss-Prot;Acc:Q8K0B3]		NULL	FALSE
Tir2-F6	NES13838968	5	74020891	C/A	CC	AA	AA		ENSMUSG00000067206	ENSMUST00000087177	Lrrc66-001	SYNONYMOUS_CODING	<0.1			Leucine-rich repeat-containing protein 66 [Source:UniProtKB/Swiss-Prot;Acc:Q8K0B3]		NULL	TRUE
Tir2-F6	NES13839572	5	74002149	C/T	CC	TT	TT	CC	ENSMUSG00000067206	ENSMUST00000087177	Lrrc66-001	SYNONYMOUS_CODING	<0.1			Leucine-rich repeat-containing protein 66 [Source:UniProtKB/Swiss-Prot;Acc:Q8K0B3]		NULL	FALSE
Tir2-F6	NES13839666	5	73998838	G/A	GG	AA	AA	AA	ENSMUSG00000067206	ENSMUST00000087177	Lrrc66-001	SYNONYMOUS_CODING	0.884			Leucine-rich repeat-containing protein 66 [Source:UniProtKB/Swiss-Prot;Acc:Q8K0B3]		NULL	TRUE
Tir2-F6	NES13839668	5	73998908	C/T	CC	TT	TT	TT	ENSMUSG00000067206	ENSMUST00000087177	Lrrc66-001	NON_SYNONYMOUS_CODING	<0.1	possibly damaging	1.631	Leucine-rich repeat-containing protein 66 [Source:UniProtKB/Swiss-Prot;Acc:Q8K0B3]		2073	TRUE
Tir2-F6	NES13839670	5	73999043	G/A	GG	AA	AA	AA	ENSMUSG00000067206	ENSMUST00000087177	Lrrc66-001	NON_SYNONYMOUS_CODING	<0.1	benign	1.208	Leucine-rich repeat-containing protein 66 [Source:UniProtKB/Swiss-Prot;Acc:Q8K0B3]		1938	TRUE
Tir2-F6	NES13839673	5	73999155	T/G	TT	GG	GG	GG	ENSMUSG00000067206	ENSMUST00000087177	Lrrc66-001	SYNONYMOUS_CODING	<0.1			Leucine-rich repeat-containing protein 66 [Source:UniProtKB/Swiss-Prot;Acc:Q8K0B3]		NULL	TRUE
Tir2-F6	NES13839676	5	73999297	G/A	GG	AA	AA	AA	ENSMUSG00000067206	ENSMUST00000087177	Lrrc66-001	SYNONYMOUS_CODING	<0.1			Leucine-rich repeat-containing protein 66 [Source:UniProtKB/Swiss-Prot;Acc:Q8K0B3]		NULL	TRUE
Tir2-F6	NES13839693	5	73999640	C/T	CC	TT	TT	CC	ENSMUSG00000067206	ENSMUST00000087177	Lrrc66-001	NON_SYNONYMOUS_CODING	<0.1	benign	0.074	Leucine-rich repeat-containing protein 66 [Source:UniProtKB/Swiss-Prot;Acc:Q8K0B3]		1341	FALSE
Tir2-F6	NES13839696	5	73999810	C/T	CC	TT	TT	CC	ENSMUSG00000067206	ENSMUST00000087177	Lrrc66-001	SYNONYMOUS_CODING	0.98			Leucine-rich repeat-containing protein 66 [Source:UniProtKB/Swiss-Prot;Acc:Q8K0B3]		NULL	FALSE
Tir2-F6	NES13839699	5	73999896	C/T	CC	TT	TT	TT	ENSMUSG00000067206	ENSMUST00000087177	Lrrc66-001	NON_SYNONYMOUS_CODING	<0.1	benign	0.055	Leucine-rich repeat-containing protein 66 [Source:UniProtKB/Swiss-Prot;Acc:Q8K0B3]		1085	TRUE
Tir2-F6	NES13839702	5	74000065	T/C	TT	CC	CC	TT	ENSMUSG00000067206	ENSMUST00000087177	Lrrc66-001	SYNONYMOUS_CODING	<0.1			Leucine-rich repeat-containing protein 66 [Source:UniProtKB/Swiss-Prot;Acc:Q8K0B3]		NULL	FALSE
Tir2-F6	NES13837934	5	74063598	G/A	GG	AA	AA		ENSMUSG00000029155	ENSMUST00000041422	Spata18-201	NON_SYNONYMOUS_CODING	1	benign	0.247	spermatogenesis associated 18 homolog [Source:RefSeq peptide;Acc:NP_848474]		368	TRUE
Tir2-F6	NES13837934	5	74063598	G/A	GG	AA	AA		ENSMUSG00000029155	ENSMUST00000113548	Spata18-203	NON_SYNONYMOUS_CODING	1			spermatogenesis associated 18 homolog [Source:RefSeq peptide;Acc:NP_848474]		286	TRUE
Tir2-F6	NES13838073	5	74060693	A/G	AA	GG			ENSMUSG00000029155	ENSMUST00000041422	Spata18-201	SYNONYMOUS_CODING	0.961			spermatogenesis associated 18 homolog [Source:RefSeq peptide;Acc:NP_848474]		NULL	TRUE
Tir2-F6	NES13838073	5	74060693	A/G	AA	GG			ENSMUSG00000029155	ENSMUST00000113548	Spata18-203	SYNONYMOUS_CODING	0.961			spermatogenesis associated 18 homolog [Source:RefSeq peptide;Acc:NP_848474]		NULL	TRUE
Tir2-F6	NES13838073	5	74060693	A/G	AA	GG			ENSMUSG00000029155	ENSMUST00000071077	Spata18-202	UPSTREAM	0.961			spermatogenesis associated 18 homolog [Source:RefSeq peptide;Acc:NP_848474]		NULL	TRUE
Tir2-F6	NES16695307	5	74594154	T/C	TT		CC	CC	ENSMUSG00000049907	ENSMUST00000051937	Rasl11b-201	SYNONYMOUS_CODING	0.998			Ras-like protein family member 11B [Source:UniProtKB/Swiss-Prot;Acc:Q922H7]		NULL	TRUE
Tir2-F6	NES16695308	5	74594196	C/T	CC	TT	TT	CC	ENSMUSG00000049907	ENSMUST00000051937	Rasl11b-201	SYNONYMOUS_CODING	0.787			Ras-like protein family member 11B [Source:UniProtKB/Swiss-Prot;Acc:Q922H7]		NULL	FALSE
Tir2-F6	NES16695018	5	74602287	T/C	TT	CC	CC	TT	ENSMUSG00000062110	ENSMUST00000113542	Scfd2-002	3PRIME_UTR	<0.1			Sec1 family domain-containing protein 2 (Syntaxin-binding protein 1-like 1)(Neuronal Sec1) [Source:UniProtKB/Swiss-Prot;Acc:Q8BTY8]		NULL	FALSE
Tir2-F6	NES16695018	5	74602287	T/C	TT	CC	CC	TT	ENSMUSG00000062110	ENSMUST00000072857	Scfd2-001	3PRIME_UTR	<0.1			Sec1 family domain-containing protein 2 (Syntaxin-binding protein 1-like 1)(Neuronal Sec1) [Source:UniProtKB/Swiss-Prot;Acc:Q8BTY8]		NULL	FALSE
Tir2-F6	NES16695018	5	74602287	T/C	TT	CC	CC	TT	ENSMUSG00000062110	ENSMUST00000121330	Scfd2-003	3PRIME_UTR	<0.1			Sec1 family domain-containing protein 2 (Syntaxin-binding protein 1-like 1)(Neuronal Sec1) [Source:UniProtKB/Swiss-Prot;Acc:Q8BTY8]		NULL	FALSE
Tir2-F6	NES16695018	5	74602287	T/C	TT	CC	CC	TT	ENSMUSG00000062110	ENSMUST00000113542	Scfd2-002	3PRIME_UTR	<0.1			Sec1 family domain-containing protein 2 (Syntaxin-binding protein 1-like 1)(Neuronal Sec1) [Source:UniProtKB/Swiss-Prot;Acc:Q8BTY8]		NULL	FALSE
Tir2-F6	NES16695018	5	74602287	T/C	TT	CC	CC	TT	ENSMUSG00000062110	ENSMUST00000072857	Scfd2-001	3PRIME_UTR	<0.1			Sec1 family domain-containing protein 2 (Syntaxin-binding protein 1-like 1)(Neuronal Sec1) [Source:UniProtKB/Swiss-Prot;Acc:Q8BTY8]		NULL	FALSE
Tir2-F6	NES16695018	5	74602287	T/C	TT	CC	CC	TT	ENSMUSG00000062110	ENSMUST00000121330	Scfd2-003	3PRIME_UTR	<0.1			Sec1 family domain-containing protein 2 (Syntaxin-binding protein 1-like 1)(Neuronal Sec1) [Source:UniProtKB/Swiss-Prot;Acc:Q8BTY8]		NULL	FALSE
Tir2-F6	NES16693904	5	75003877	C/T	CC	TT	TT	CC	ENSMUSG00000029228	ENSMUST00000113531	Lnx1-202	SYNONYMOUS_CODING	0.935			E3 ubiquitin-protein ligase LNX (EC 6.3.2.-)(Numb-binding protein 1)(Ligand of Numb-binding protein 1)(Ligand of Numb protein X 1) [Source:UniProtKB/Swiss-Prot;Acc:O70263]		NULL	FALSE
Tir2-F6	NES16693904	5	75003877	C/T	CC	TT	TT	CC	ENSMUSG00000029228	ENSMUST00000039744	Lnx1-001	SYNONYMOUS_CODING	0.935			E3 ubiquitin-protein ligase LNX (EC 6.3.2.-)(Numb-binding protein 1)(Ligand of Numb-binding protein 1)(Ligand of Numb protein X 1) [Source:UniProtKB/Swiss-Prot;Acc:O70263]		NULL	FALSE
Tir2-F6	NES16693904	5	75003877	C/T	CC	TT	TT	CC	ENSMUSG00000029228	ENSMUST00000087161	Lnx1-201	SYNONYMOUS_CODING	0.935			E3 ubiquitin-protein ligase LNX (EC 6.3.2.-)(Numb-binding protein 1)(Ligand of Numb-binding protein 1)(Ligand of Numb protein X 1) [Source:UniProtKB/Swiss-Prot;Acc:O70263]		NULL	FALSE
Tir2-F6	NES16693904	5	75003877	C/T	CC	TT	TT	CC	ENSMUSG00000029228	ENSMUST00000117525	Lnx1-004	SYNONYMOUS_CODING	0.935			E3 ubiquitin-protein ligase LNX (EC 6.3.2.-)(Numb-binding protein 1)(Ligand of Numb-binding protein 1)(Ligand of Numb protein X 1) [Source:UniProtKB/Swiss-Prot;Acc:O70263]		NULL	FALSE
Tir2-F6	NES16693904	5	75003877	C/T	CC	TT	TT	CC	ENSMUSG00000029228	ENSMUST00000117388	Lnx1-006	SYNONYMOUS_CODING	0.935			E3 ubiquitin-protein ligase LNX (EC 6.3.2.-)(Numb-binding protein 1)(Ligand of Numb-binding protein 1)(Ligand of Numb protein X 1) [Source:UniProtKB/Swiss-Prot;Acc:O70263]		NULL	FALSE
Tir2-F6	NES16693904	5	75003877	C/T	CC	TT	TT	CC	ENSMUSG00000029228	ENSMUST00000121690	Lnx1-003	SYNONYMOUS_CODING	0.935			E3 ubiquitin-protein ligase LNX (EC 6.3.2.-)(Numb-binding protein 1)(Ligand of Numb-binding protein 1)(Ligand of Numb protein X 1) [Source:UniProtKB/Swiss-Prot;Acc:O70263]		NULL	FALSE
Tir2-F6	NES16691765	5	75081669	A/G	AA	GG	GG	GG	ENSMUSG00000029228	ENSMUST00000087161	Lnx1-201	SYNONYMOUS_CODING	1			E3 ubiquitin-protein ligase LNX (EC 6.3.2.-)(Numb-binding protein 1)(Ligand of Numb-binding protein 1)(Ligand of Numb protein X 1) [Source:UniProtKB/Swiss-Prot;Acc:O70263]		NULL	TRUE
Tir2-F6	NES16691765	5	75081669	A/G	AA	GG	GG	GG	ENSMUSG00000029228	ENSMUST00000117388	Lnx1-006	SYNONYMOUS_CODING	1			E3 ubiquitin-protein ligase LNX (EC 6.3.2.-)(Numb-binding protein 1)(Ligand of Numb-binding protein 1)(Ligand of Numb protein X 1) [Source:UniProtKB/Swiss-Prot;Acc:O70263]		NULL	TRUE
Tir2-F6	NES16691765	5	75081669	A/G	AA	GG	GG	GG	ENSMUSG00000029228	ENSMUST00000087161	Lnx1-201	SYNONYMOUS_CODING	1			E3 ubiquitin-protein ligase LNX (EC 6.3.2.-)(Numb-binding protein 1)(Ligand of Numb-binding protein 1)(Ligand of Numb protein X 1) [Source:UniProtKB/Swiss-Prot;Acc:O70263]		NULL	TRUE
Tir2-F6	NES16691765	5	75081669	A/G	AA	GG	GG	GG	ENSMUSG00000029228	ENSMUST00000117388	Lnx1-006	SYNONYMOUS_CODING	1			E3 ubiquitin-protein ligase LNX (EC 6.3.2.-)(Numb-binding protein 1)(Ligand of Numb-binding protein 1)(Ligand of Numb protein X 1) [Source:UniProtKB/Swiss-Prot;Acc:O70263]		NULL	TRUE
Tir2-F6	NES16687127	5	75345226	T/A	TT	AA		TT	ENSMUSG00000072874	ENSMUST00000101121	EG619945-201	5PRIME_UTR	<0.1			Putative uncharacterized protein [Source:UniProtKB/TrEMBL;Acc:Q3UNM3]		NULL	FALSE
Tir2-F6	NES16687128	5	75345398	T/C	TT			TT	ENSMUSG00000072874	ENSMUST00000101121	EG619945-201	5PRIME_UTR	<0.1			Putative uncharacterized protein [Source:UniProtKB/TrEMBL;Acc:Q3UNM3]		NULL	FALSE
Tir2-F6	NES16686444	5	75362278	T/A	TT		AA	TT	ENSMUSG00000072874	ENSMUST00000101121	EG619945-201	3PRIME_UTR	<0.1			Putative uncharacterized protein [Source:UniProtKB/TrEMBL;Acc:Q3UNM3]		NULL	FALSE
Tir2-F6	NES16686446	5	75362301	G/A	GG			AA	ENSMUSG00000072874	ENSMUST00000101121	EG619945-201	3PRIME_UTR	<0.1			Putative uncharacterized protein [Source:UniProtKB/TrEMBL;Acc:Q3UNM3]		NULL	TRUE
Tir2-F6	NES13838753	5	75588536	G/A	GG				ENSMUSG00000029231	ENSMUST00000000476	Pdgfra-201	SYNONYMOUS_CODING	0.981			Alpha-type platelet-derived growth factor receptor Precursor (EC 2.7.10.1)(PDGF-R-alpha)(CD140 antigen-like family member A)(CD140a antigen) [Source:UniProtKB/Swiss-Prot;Acc:P26618]		NULL	TRUE
Tir2-F6	NES16685514	5	77287225	G/A	GG				ENSMUSG00000036377	ENSMUST00000121160	AC166328.1-001	NON_SYNONYMOUS_CODING	<0.1	benign	0.491	Putative uncharacterized protein [Source:UniProtKB/TrEMBL;Acc:Q9D510]		803	TRUE
Tir2-F6	NES16685514	5	77287225	G/A	GG				ENSMUSG00000036377	ENSMUST00000120639	AC166328.1-002	NON_SYNONYMOUS_CODING	<0.1	benign	0.491	Putative uncharacterized protein [Source:UniProtKB/TrEMBL;Acc:Q9D510]		803	TRUE
Tir2-F6	NES16685514	5	77287225	G/A	GG				ENSMUSG00000036377	ENSMUST00000048811	C530008M17Rik-201	5PRIME_UTR	<0.1			Putative uncharacterized protein [Source:UniProtKB/TrEMBL;Acc:Q9D510]		NULL	TRUE
Tir2-F6	NES16685515	5	77288013	T/G	TT				ENSMUSG00000036377	ENSMUST00000121160	AC166328.1-001	SYNONYMOUS_CODING	<0.1			Putative uncharacterized protein [Source:UniProtKB/TrEMBL;Acc:Q9D510]		NULL	TRUE
Tir2-F6	NES16685515	5	77288013	T/G	TT				ENSMUSG00000036377	ENSMUST00000120639	AC166328.1-002	SYNONYMOUS_CODING	<0.1			Putative uncharacterized protein [Source:UniProtKB/TrEMBL;Acc:Q9D510]		NULL	TRUE
Tir2-F6	NES16685515	5	77288013	T/G	TT				ENSMUSG00000036377	ENSMUST00000048811	C530008M17Rik-201	SYNONYMOUS_CODING	<0.1			Putative uncharacterized protein [Source:UniProtKB/TrEMBL;Acc:Q9D510]		NULL	TRUE
Tir2-F6	NES16685511	5	77286132	T/A	TT				ENSMUSG00000036377	ENSMUST00000121160	AC166328.1-001	SYNONYMOUS_CODING	<0.1			Putative uncharacterized protein [Source:UniProtKB/TrEMBL;Acc:Q9D510]		NULL	TRUE
Tir2-F6	NES16685511	5	77286132	T/A	TT				ENSMUSG00000036377	ENSMUST00000120639	AC166328.1-002	SYNONYMOUS_CODING	<0.1			Putative uncharacterized protein [Source:UniProtKB/TrEMBL;Acc:Q9D510]		NULL	TRUE
Tir2-F6	NES16685511	5	77286132	T/A	TT				ENSMUSG00000036377	ENSMUST00000048811	C530008M17Rik-201	UPSTREAM	<0.1			Putative uncharacterized protein [Source:UniProtKB/TrEMBL;Acc:Q9D510]		NULL	TRUE
Tir2-F6	NES16685514	5	77287225	G/A	GG				ENSMUSG00000036377	ENSMUST00000121160	AC166328.1-001	NON_SYNONYMOUS_CODING	<0.1	benign	0.491	Putative uncharacterized protein [Source:UniProtKB/TrEMBL;Acc:Q9D510]		803	TRUE
Tir2-F6	NES16685514	5	77287225	G/A	GG				ENSMUSG00000036377	ENSMUST00000120639	AC166328.1-002	NON_SYNONYMOUS_CODING	<0.1	benign	0.491	Putative uncharacterized protein [Source:UniProtKB/TrEMBL;Acc:Q9D510]		803	TRUE
Tir2-F6	NES16685514	5	77287225	G/A	GG				ENSMUSG00000036377	ENSMUST00000048811	C530008M17Rik-201	5PRIME_UTR	<0.1			Putative uncharacterized protein [Source:UniProtKB/TrEMBL;Acc:Q9D510]		NULL	TRUE
Tir2-F6	NES16685515	5	77288013	T/G	TT				ENSMUSG00000036377	ENSMUST00000121160	AC166328.1-001	SYNONYMOUS_CODING	<0.1			Putative uncharacterized protein [Source:UniProtKB/TrEMBL;Acc:Q9D510]		NULL	TRUE
Tir2-F6	NES16685515	5	77288013	T/G	TT				ENSMUSG00000036377	ENSMUST00000120639	AC166328.1-002	SYNONYMOUS_CODING	<0.1			Putative uncharacterized protein [Source:UniProtKB/TrEMBL;Acc:Q9D510]		NULL	TRUE
Tir2-F6	NES16685515	5	77288013	T/G	TT				ENSMUSG00000036377	ENSMUST00000048811	C530008M17Rik-201	SYNONYMOUS_CODING	<0.1			Putative uncharacterized protein [Source:UniProtKB/TrEMBL;Acc:Q9D510]		NULL	TRUE
Tir2-F6	NES16685511	5	77286132	T/A	TT				ENSMUSG00000036377	ENSMUST00000121160	AC166328.1-001	SYNONYMOUS_CODING	<0.1			Putative uncharacterized protein [Source:UniProtKB/TrEMBL;Acc:Q9D510]		NULL	TRUE
Tir2-F6	NES16685511	5	77286132	T/A	TT				ENSMUSG00000036377	ENSMUST00000120639	AC166328.1-002	SYNONYMOUS_CODING	<0.1			Putative uncharacterized protein [Source:UniProtKB/TrEMBL;Acc:Q9D510]		NULL	TRUE
Tir2-F6	NES16685511	5	77286132	T/A	TT				ENSMUSG00000036377	ENSMUST00000048811	C530008M17Rik-201	UPSTREAM	<0.1			Putative uncharacterized protein [Source:UniProtKB/TrEMBL;Acc:Q9D510]		NULL	TRUE
Tir2-F6	NES16685514	5	77287225	G/A	GG				ENSMUSG00000036377	ENSMUST00000121160	AC166328.1-001	NON_SYNONYMOUS_CODING	<0.1	benign	0.491	Putative uncharacterized protein [Source:UniProtKB/TrEMBL;Acc:Q9D510]		803	TRUE
Tir2-F6	NES16685514	5	77287225	G/A	GG				ENSMUSG00000036377	ENSMUST00000120639	AC166328.1-002	NON_SYNONYMOUS_CODING	<0.1	benign	0.491	Putative uncharacterized protein [Source:UniProtKB/TrEMBL;Acc:Q9D510]		803	TRUE
Tir2-F6	NES16685514	5	77287225	G/A	GG				ENSMUSG00000036377	ENSMUST00000048811	C530008M17Rik-201	5PRIME_UTR	<0.1			Putative uncharacterized protein [Source:UniProtKB/TrEMBL;Acc:Q9D510]		NULL	TRUE
Tir2-F6	NES16685515	5	77288013	T/G	TT				ENSMUSG00000036377	ENSMUST00000121160	AC166328.1-001	SYNONYMOUS_CODING	<0.1			Putative uncharacterized protein [Source:UniProtKB/TrEMBL;Acc:Q9D510]		NULL	TRUE
Tir2-F6	NES16685515	5	77288013	T/G	TT				ENSMUSG00000036377	ENSMUST00000120639	AC166328.1-002	SYNONYMOUS_CODING	<0.1			Putative uncharacterized protein [Source:UniProtKB/TrEMBL;Acc:Q9D510]		NULL	TRUE
Tir2-F6	NES16685515	5	77288013	T/G	TT				ENSMUSG00000036377	ENSMUST00000048811	C530008M17Rik-201	SYNONYMOUS_CODING	<0.1			Putative uncharacterized protein [Source:UniProtKB/TrEMBL;Acc:Q9D510]		NULL	TRUE
Tir2-F6	NES16696343	5	77416918	A/G	AA				ENSMUSG00000036323	ENSMUST00000101087	Srp72-001	SYNONYMOUS_CODING	1			signal recognition particle 72 [Source:RefSeq peptide;Acc:NP_079967]		NULL	TRUE
Tir2-F6	NES16696343	5	77416918	A/G	AA				ENSMUSG00000036323	ENSMUST00000120550	Srp72-002	SYNONYMOUS_CODING	1			signal recognition particle 72 [Source:RefSeq peptide;Acc:NP_079967]		NULL	TRUE
Tir2-F6	NES16696258	5	77423911	C/G	CC	GG			ENSMUSG00000036323	ENSMUST00000101087	Srp72-001	NON_SYNONYMOUS_CODING	0.998	probably damaging	2.032	signal recognition particle 72 [Source:RefSeq peptide;Acc:NP_079967]		492	TRUE
Tir2-F6	NES16696258	5	77423911	C/G	CC	GG			ENSMUSG00000036323	ENSMUST00000120550	Srp72-002	NON_SYNONYMOUS_CODING	0.998			signal recognition particle 72 [Source:RefSeq peptide;Acc:NP_079967]		431	TRUE
Tir2-F6	NES16696236	5	77425680	G/A	GG				ENSMUSG00000036323	ENSMUST00000101087	Srp72-001	SYNONYMOUS_CODING	0.975			signal recognition particle 72 [Source:RefSeq peptide;Acc:NP_079967]		NULL	TRUE
Tir2-F6	NES16696236	5	77425680	G/A	GG				ENSMUSG00000036323	ENSMUST00000120550	Srp72-002	SYNONYMOUS_CODING	0.975			signal recognition particle 72 [Source:RefSeq peptide;Acc:NP_079967]		NULL	TRUE
Tir2-F6	NES16696224	5	77427404	A/G	AA	GG	GG		ENSMUSG00000036323	ENSMUST00000101087	Srp72-001	3PRIME_UTR	<0.1			signal recognition particle 72 [Source:RefSeq peptide;Acc:NP_079967]		NULL	TRUE
Tir2-F6	NES16696224	5	77427404	A/G	AA	GG	GG		ENSMUSG00000036323	ENSMUST00000120550	Srp72-002	3PRIME_UTR	<0.1			signal recognition particle 72 [Source:RefSeq peptide;Acc:NP_079967]		NULL	TRUE
Tir2-F6	NES16696225	5	77427413	A/T	AA				ENSMUSG00000036323	ENSMUST00000101087	Srp72-001	3PRIME_UTR	<0.1			signal recognition particle 72 [Source:RefSeq peptide;Acc:NP_079967]		NULL	TRUE
Tir2-F6	NES16696225	5	77427413	A/T	AA				ENSMUSG00000036323	ENSMUST00000120550	Srp72-002	3PRIME_UTR	<0.1			signal recognition particle 72 [Source:RefSeq peptide;Acc:NP_079967]		NULL	TRUE
Tir2-F6	NES16696224	5	77427404	A/G	AA	GG	GG		ENSMUSG00000036323	ENSMUST00000101087	Srp72-001	3PRIME_UTR	<0.1			signal recognition particle 72 [Source:RefSeq peptide;Acc:NP_079967]		NULL	TRUE
Tir2-F6	NES16696224	5	77427404	A/G	AA	GG	GG		ENSMUSG00000036323	ENSMUST00000120550	Srp72-002	3PRIME_UTR	<0.1			signal recognition particle 72 [Source:RefSeq peptide;Acc:NP_079967]		NULL	TRUE
Tir2-F6	NES16696225	5	77427413	A/T	AA				ENSMUSG00000036323	ENSMUST00000101087	Srp72-001	3PRIME_UTR	<0.1			signal recognition particle 72 [Source:RefSeq peptide;Acc:NP_079967]		NULL	TRUE
Tir2-F6	NES16696225	5	77427413	A/T	AA				ENSMUSG00000036323	ENSMUST00000120550	Srp72-002	3PRIME_UTR	<0.1			signal recognition particle 72 [Source:RefSeq peptide;Acc:NP_079967]		NULL	TRUE
Tir2-F6	NES10427563	5	87346584	T/C	TT	CC		TT	ENSMUSG00000075732	ENSMUST00000097250	U6	UPSTREAM	<0.1			U6 spliceosomal RNA [Source:RFAM;Acc:RF00026]		NULL	FALSE
Tir2-F6	NES10427563	5	87346584	T/C	TT	CC		TT	ENSMUSG00000035836	ENSMUST00000031183	Ugt2b1-201	3PRIME_UTR	<0.1			UDP glucuronosyltransferase 2 family, polypeptide B1 [Source:RefSeq peptide;Acc:NP_690024]		NULL	FALSE
Tir2-F6	NES10427564	5	87346630	T/C	TT	CC		TT	ENSMUSG00000075732	ENSMUST00000097250	U6	UPSTREAM	0.174			U6 spliceosomal RNA [Source:RFAM;Acc:RF00026]		NULL	FALSE
Tir2-F6	NES10427565	5	87346706	C/T	CC		TT		ENSMUSG00000075732	ENSMUST00000097250	U6	UPSTREAM	0.991			U6 spliceosomal RNA [Source:RFAM;Acc:RF00026]		NULL	TRUE
Tir2-F6	NES10424616	5	87436421	C/T	CC	TT	TT		ENSMUSG00000035811	ENSMUST00000031186	Ugt2b35-001	SPLICE_SITE	0.884			UDP glucuronosyltransferase 2 family, polypeptide B35 [Source:RefSeq peptide;Acc:NP_766469]		NULL	TRUE
Tir2-F6	NES10424616	5	87436421	C/T	CC	TT	TT		ENSMUSG00000035811	ENSMUST00000031186	Ugt2b35-001	SYNONYMOUS_CODING	0.884			UDP glucuronosyltransferase 2 family, polypeptide B35 [Source:RefSeq peptide;Acc:NP_766469]		NULL	TRUE
Tir2-F6	NES10424561	5	87437228	C/T	CC	TT	TT	TT	ENSMUSG00000035811	ENSMUST00000031186	Ugt2b35-001	NON_SYNONYMOUS_CODING	0.744	benign	0.549	UDP glucuronosyltransferase 2 family, polypeptide B35 [Source:RefSeq peptide;Acc:NP_766469]		385	TRUE
Tir2-F6	NES10421470	5	87565154	C/T	CC				ENSMUSG00000054630	ENSMUST00000067790	Ugt2b5-201	NON_SYNONYMOUS_CODING	<0.1	benign	0.111	UDP-glucuronosyltransferase 2B5 Precursor (UDPGT 2B5)(EC 2.4.1.17)(M-1) [Source:UniProtKB/Swiss-Prot;Acc:P17717]		1004	TRUE
Tir2-F6	NES10421470	5	87565154	C/T	CC				ENSMUSG00000054630	ENSMUST00000113327	Ugt2b5-202	NON_SYNONYMOUS_CODING	<0.1			UDP-glucuronosyltransferase 2B5 Precursor (UDPGT 2B5)(EC 2.4.1.17)(M-1) [Source:UniProtKB/Swiss-Prot;Acc:P17717]		1004	TRUE
Tir2-F6	NES10414677	5	87840912	T/C	TT				ENSMUSG00000061906	ENSMUST00000072818	Ugt2b38-201	NON_SYNONYMOUS_CODING	<0.1	probably damaging	3.213	UDP glucuronosyltransferase 2 family, polypeptide B38 [Source:RefSeq peptide;Acc:NP_598655]		1177	TRUE
Tir2-F6	NES10413099	5	87889462	T/G	TT				ENSMUSG00000029268	ENSMUST00000079811	Ugt2a2-202	SYNONYMOUS_CODING	<0.1			UDP-glucuronosyltransferase 2A1 Precursor (UDPGT 2A1)(EC 2.4.1.17) [Source:UniProtKB/Swiss-Prot;Acc:Q80X89]		NULL	TRUE
Tir2-F6	NES10413099	5	87889462	T/G	TT				ENSMUSG00000029268	ENSMUST00000031197	Ugt2a2-201	SYNONYMOUS_CODING	<0.1			UDP-glucuronosyltransferase 2A1 Precursor (UDPGT 2A1)(EC 2.4.1.17) [Source:UniProtKB/Swiss-Prot;Acc:Q80X89]		NULL	TRUE
Tir2-F6	NES10413100	5	87889493	A/G	AA	GG	GG	GG	ENSMUSG00000029268	ENSMUST00000079811	Ugt2a2-202	NON_SYNONYMOUS_CODING	<0.1	benign	0.465	UDP-glucuronosyltransferase 2A1 Precursor (UDPGT 2A1)(EC 2.4.1.17) [Source:UniProtKB/Swiss-Prot;Acc:Q80X89]		1561	TRUE
Tir2-F6	NES10413100	5	87889493	A/G	AA	GG	GG	GG	ENSMUSG00000029268	ENSMUST00000031197	Ugt2a2-201	NON_SYNONYMOUS_CODING	<0.1	benign	0.537	UDP-glucuronosyltransferase 2A1 Precursor (UDPGT 2A1)(EC 2.4.1.17) [Source:UniProtKB/Swiss-Prot;Acc:Q80X89]		1511	TRUE
Tir2-F6	NES10413101	5	87889502	G/T	GG		TT		ENSMUSG00000029268	ENSMUST00000079811	Ugt2a2-202	NON_SYNONYMOUS_CODING	<0.1	possibly damaging	1.782	UDP-glucuronosyltransferase 2A1 Precursor (UDPGT 2A1)(EC 2.4.1.17) [Source:UniProtKB/Swiss-Prot;Acc:Q80X89]		1552	TRUE
Tir2-F6	NES10413101	5	87889502	G/T	GG		TT		ENSMUSG00000029268	ENSMUST00000031197	Ugt2a2-201	NON_SYNONYMOUS_CODING	<0.1	possibly damaging	1.803	UDP-glucuronosyltransferase 2A1 Precursor (UDPGT 2A1)(EC 2.4.1.17) [Source:UniProtKB/Swiss-Prot;Acc:Q80X89]		1502	TRUE
Tir2-F6	NES10413104	5	87889675	T/C	TT	CC		CC	ENSMUSG00000029268	ENSMUST00000079811	Ugt2a2-202	SYNONYMOUS_CODING	<0.1			UDP-glucuronosyltransferase 2A1 Precursor (UDPGT 2A1)(EC 2.4.1.17) [Source:UniProtKB/Swiss-Prot;Acc:Q80X89]		NULL	TRUE
Tir2-F6	NES10413104	5	87889675	T/C	TT	CC		CC	ENSMUSG00000029268	ENSMUST00000031197	Ugt2a2-201	SYNONYMOUS_CODING	<0.1			UDP-glucuronosyltransferase 2A1 Precursor (UDPGT 2A1)(EC 2.4.1.17) [Source:UniProtKB/Swiss-Prot;Acc:Q80X89]		NULL	TRUE
Tir2-F6	NES16695606	5	87949842	A/G	AA				ENSMUSG00000029269	ENSMUST00000031199	Sult1b1-001	SYNONYMOUS_CODING	<0.1			Sulfotransferase family cytosolic 1B member 1 (Sulfotransferase 1B1)(EC 2.8.2.-)(DOPA/tyrosine sulfotransferase) [Source:UniProtKB/Swiss-Prot;Acc:Q9QWG7]		NULL	TRUE
Tir2-F6	NES16695606	5	87949842	A/G	AA				ENSMUSG00000029269	ENSMUST00000117455	Sult1b1-002	SYNONYMOUS_CODING	<0.1			Sulfotransferase family cytosolic 1B member 1 (Sulfotransferase 1B1)(EC 2.8.2.-)(DOPA/tyrosine sulfotransferase) [Source:UniProtKB/Swiss-Prot;Acc:Q9QWG7]		NULL	TRUE
Tir2-F6	NES16695606	5	87949842	A/G	AA				ENSMUSG00000029269	ENSMUST00000120150	Sult1b1-003	SYNONYMOUS_CODING	<0.1			Sulfotransferase family cytosolic 1B member 1 (Sulfotransferase 1B1)(EC 2.8.2.-)(DOPA/tyrosine sulfotransferase) [Source:UniProtKB/Swiss-Prot;Acc:Q9QWG7]		NULL	TRUE
Tir2-F6	NES16695711	5	87943345	A/C	AA		CC	CC	ENSMUSG00000029269	ENSMUST00000031199	Sult1b1-001	3PRIME_UTR	<0.1			Sulfotransferase family cytosolic 1B member 1 (Sulfotransferase 1B1)(EC 2.8.2.-)(DOPA/tyrosine sulfotransferase) [Source:UniProtKB/Swiss-Prot;Acc:Q9QWG7]		NULL	TRUE
Tir2-F6	NES16695711	5	87943345	A/C	AA		CC	CC	ENSMUSG00000029269	ENSMUST00000117455	Sult1b1-002	3PRIME_UTR	<0.1			Sulfotransferase family cytosolic 1B member 1 (Sulfotransferase 1B1)(EC 2.8.2.-)(DOPA/tyrosine sulfotransferase) [Source:UniProtKB/Swiss-Prot;Acc:Q9QWG7]		NULL	TRUE
Tir2-F6	NES16695711	5	87943345	A/C	AA		CC	CC	ENSMUSG00000029269	ENSMUST00000120150	Sult1b1-003	DOWNSTREAM	<0.1			Sulfotransferase family cytosolic 1B member 1 (Sulfotransferase 1B1)(EC 2.8.2.-)(DOPA/tyrosine sulfotransferase) [Source:UniProtKB/Swiss-Prot;Acc:Q9QWG7]		NULL	TRUE
Tir2-F6	NES16695711	5	87943345	A/C	AA		CC	CC	ENSMUSG00000029269	ENSMUST00000031199	Sult1b1-001	3PRIME_UTR	<0.1			Sulfotransferase family cytosolic 1B member 1 (Sulfotransferase 1B1)(EC 2.8.2.-)(DOPA/tyrosine sulfotransferase) [Source:UniProtKB/Swiss-Prot;Acc:Q9QWG7]		NULL	TRUE
Tir2-F6	NES16695711	5	87943345	A/C	AA		CC	CC	ENSMUSG00000029269	ENSMUST00000117455	Sult1b1-002	3PRIME_UTR	<0.1			Sulfotransferase family cytosolic 1B member 1 (Sulfotransferase 1B1)(EC 2.8.2.-)(DOPA/tyrosine sulfotransferase) [Source:UniProtKB/Swiss-Prot;Acc:Q9QWG7]		NULL	TRUE
Tir2-F6	NES16695711	5	87943345	A/C	AA		CC	CC	ENSMUSG00000029269	ENSMUST00000120150	Sult1b1-003	DOWNSTREAM	<0.1			Sulfotransferase family cytosolic 1B member 1 (Sulfotransferase 1B1)(EC 2.8.2.-)(DOPA/tyrosine sulfotransferase) [Source:UniProtKB/Swiss-Prot;Acc:Q9QWG7]		NULL	TRUE
Tir2-F6	NES13832183	5	88339715	C/G	CC				ENSMUSG00000070701	ENSMUST00000094637	AC022298.31-201	SPLICE_SITE	<0.1			No description		NULL	TRUE
Tir2-F6	NES13832183	5	88339715	C/G	CC				ENSMUSG00000070701	ENSMUST00000094637	AC022298.31-201	SYNONYMOUS_CODING	<0.1			No description		NULL	TRUE
Tir2-F6	NES16700777	5	88393334	C/T	CC				ENSMUSG00000055961	ENSMUST00000069773	BC051076-201	NON_SYNONYMOUS_CODING	<0.1	benign	0.9	BC051076 protein Fragment [Source:UniProtKB/TrEMBL;Acc:Q80XE3]		275	TRUE
Tir2-F6	NES16700778	5	88393574	T/G	TT				ENSMUSG00000055961	ENSMUST00000069773	BC051076-201	NON_SYNONYMOUS_CODING	<0.1	benign	1.35	BC051076 protein Fragment [Source:UniProtKB/TrEMBL;Acc:Q80XE3]		355	TRUE
Tir2-F6	NES16700778	5	88393574	T/G	TT				ENSMUSG00000007457	ENSMUST00000007601	2310003L06Rik-201	UPSTREAM	<0.1			Putative uncharacterized protein Fragment [Source:UniProtKB/TrEMBL;Acc:Q9CV82]		NULL	TRUE
Tir2-F6	NES16700779	5	88393975	G/A	GG				ENSMUSG00000055961	ENSMUST00000069773	BC051076-201	3PRIME_UTR	<0.1			BC051076 protein Fragment [Source:UniProtKB/TrEMBL;Acc:Q80XE3]		NULL	TRUE
Tir2-F6	NES16700779	5	88393975	G/A	GG				ENSMUSG00000007457	ENSMUST00000007601	2310003L06Rik-201	UPSTREAM	<0.1			Putative uncharacterized protein Fragment [Source:UniProtKB/TrEMBL;Acc:Q9CV82]		NULL	TRUE
Tir2-F6	NES16700780	5	88394254	T/C	TT				ENSMUSG00000055961	ENSMUST00000069773	BC051076-201	3PRIME_UTR	<0.1			BC051076 protein Fragment [Source:UniProtKB/TrEMBL;Acc:Q80XE3]		NULL	TRUE
Tir2-F6	NES16700780	5	88394254	T/C	TT				ENSMUSG00000007457	ENSMUST00000007601	2310003L06Rik-201	UPSTREAM	<0.1			Putative uncharacterized protein Fragment [Source:UniProtKB/TrEMBL;Acc:Q9CV82]		NULL	TRUE
Tir2-F6	NES16700781	5	88394316	T/C	TT				ENSMUSG00000055961	ENSMUST00000069773	BC051076-201	3PRIME_UTR	<0.1			BC051076 protein Fragment [Source:UniProtKB/TrEMBL;Acc:Q80XE3]		NULL	TRUE
Tir2-F6	NES16700781	5	88394316	T/C	TT				ENSMUSG00000007457	ENSMUST00000007601	2310003L06Rik-201	UPSTREAM	<0.1			Putative uncharacterized protein Fragment [Source:UniProtKB/TrEMBL;Acc:Q9CV82]		NULL	TRUE
Tir2-F6	NES16700782	5	88394575	A/G	AA				ENSMUSG00000055961	ENSMUST00000069773	BC051076-201	3PRIME_UTR	<0.1			BC051076 protein Fragment [Source:UniProtKB/TrEMBL;Acc:Q80XE3]		NULL	TRUE
Tir2-F6	NES16700782	5	88394575	A/G	AA				ENSMUSG00000007457	ENSMUST00000007601	2310003L06Rik-201	UPSTREAM	<0.1			Putative uncharacterized protein Fragment [Source:UniProtKB/TrEMBL;Acc:Q9CV82]		NULL	TRUE
Tir2-F6	NES16700767	5	88395083	C/A	CC				ENSMUSG00000055961	ENSMUST00000069773	BC051076-201	3PRIME_UTR	<0.1			BC051076 protein Fragment [Source:UniProtKB/TrEMBL;Acc:Q80XE3]		NULL	TRUE
Tir2-F6	NES16700767	5	88395083	C/A	CC				ENSMUSG00000007457	ENSMUST00000007601	2310003L06Rik-201	UPSTREAM	<0.1			Putative uncharacterized protein Fragment [Source:UniProtKB/TrEMBL;Acc:Q9CV82]		NULL	TRUE
Tir2-F6	NES16700768	5	88395201	A/T	AA				ENSMUSG00000055961	ENSMUST00000069773	BC051076-201	3PRIME_UTR	<0.1			BC051076 protein Fragment [Source:UniProtKB/TrEMBL;Acc:Q80XE3]		NULL	TRUE
Tir2-F6	NES16700768	5	88395201	A/T	AA				ENSMUSG00000007457	ENSMUST00000007601	2310003L06Rik-201	UPSTREAM	<0.1			Putative uncharacterized protein Fragment [Source:UniProtKB/TrEMBL;Acc:Q9CV82]		NULL	TRUE
Tir2-F6	NES16707514	5	89211913	A/T	AA				ENSMUSG00000029366	ENSMUST00000031311	Dck-001	3PRIME_UTR	<0.1			Deoxycytidine kinase (dCK)(EC 2.7.1.74) [Source:UniProtKB/Swiss-Prot;Acc:P43346]		NULL	TRUE
Tir2-F6	NES16707515	5	89211991	A/G	AA				ENSMUSG00000029366	ENSMUST00000031311	Dck-001	3PRIME_UTR	<0.1			Deoxycytidine kinase (dCK)(EC 2.7.1.74) [Source:UniProtKB/Swiss-Prot;Acc:P43346]		NULL	TRUE
Tir2-F6	NES16707518	5	89212259	G/A	GG				ENSMUSG00000029366	ENSMUST00000031311	Dck-001	3PRIME_UTR	<0.1			Deoxycytidine kinase (dCK)(EC 2.7.1.74) [Source:UniProtKB/Swiss-Prot;Acc:P43346]		NULL	TRUE
Tir2-F6	NES16706243	5	89267143	G/A	GG				ENSMUSG00000082389	ENSMUST00000122035	Mkrn1-ps1-001	WITHIN_NON_CODING_GENE	0.306			No description		NULL	TRUE
Tir2-F6	NES16706244	5	89267233	T/C	TT				ENSMUSG00000082389	ENSMUST00000122035	Mkrn1-ps1-001	WITHIN_NON_CODING_GENE	<0.1			No description		NULL	TRUE
Tir2-F6	NES16706245	5	89267305	G/A	GG				ENSMUSG00000082389	ENSMUST00000122035	Mkrn1-ps1-001	WITHIN_NON_CODING_GENE	0.901			No description		NULL	TRUE
Tir2-F6	NES16706246	5	89267601	C/T	CC				ENSMUSG00000082389	ENSMUST00000122035	Mkrn1-ps1-001	WITHIN_NON_CODING_GENE	0.983			No description		NULL	TRUE
Tir2-F6	NES16706247	5	89267680	C/T	CC				ENSMUSG00000082389	ENSMUST00000122035	Mkrn1-ps1-001	WITHIN_NON_CODING_GENE	0.998			No description		NULL	TRUE
Tir2-F6	NES16711280	5	89657892	C/G	CC		GG	GG	ENSMUSG00000060961	ENSMUST00000066831	Slc4a4-201	SYNONYMOUS_CODING	1			Electrogenic sodium bicarbonate cotransporter 1 (Sodium bicarbonate cotransporter)(Na(+)/HCO3(-) cotransporter)(Solute carrier family 4 member 4) [Source:UniProtKB/Swiss-Prot;Acc:O88343]		NULL	TRUE
Tir2-F6	NES16711280	5	89657892	C/G	CC		GG	GG	ENSMUSG00000060961	ENSMUST00000113218	Slc4a4-203	SYNONYMOUS_CODING	1			Electrogenic sodium bicarbonate cotransporter 1 (Sodium bicarbonate cotransporter)(Na(+)/HCO3(-) cotransporter)(Solute carrier family 4 member 4) [Source:UniProtKB/Swiss-Prot;Acc:O88343]		NULL	TRUE
Tir2-F6	NES10445506	5	91231655	T/C	TT	CC	CC	CC	ENSMUSG00000029375	ENSMUST00000031322	Cxcl15-201	3PRIME_UTR	<0.1			C-X-C motif chemokine 15 Precursor (Small-inducible cytokine B15)(Lungkine) [Source:UniProtKB/Swiss-Prot;Acc:Q9WVL7]		NULL	TRUE
Tir2-F6	NES16703282	5	91322139	T/A	TT				ENSMUSG00000029380	ENSMUST00000031327	Cxcl1-001	SPLICE_SITE	<0.1			Growth-regulated alpha protein Precursor (C-X-C motif chemokine 1)(Platelet-derived growth factor-inducible protein KC)(Secretory protein N51) [Contains KC(5-72)(KC-T)(Hematopoietic synergistic factor)(HSF)] [Source:UniProtKB/Swiss-Prot;Acc:P12850]		NULL	TRUE
Tir2-F6	NES16703282	5	91322139	T/A	TT				ENSMUSG00000029380	ENSMUST00000031327	Cxcl1-001	3PRIME_UTR	<0.1			Growth-regulated alpha protein Precursor (C-X-C motif chemokine 1)(Platelet-derived growth factor-inducible protein KC)(Secretory protein N51) [Contains KC(5-72)(KC-T)(Hematopoietic synergistic factor)(HSF)] [Source:UniProtKB/Swiss-Prot;Acc:P12850]		NULL	TRUE
Tir2-F6	NES16702741	5	91334414	A/G	AA			GG	ENSMUSG00000058427	ENSMUST00000075433	Cxcl2-201	3PRIME_UTR	<0.1			C-X-C motif chemokine 2 Precursor (Macrophage inflammatory protein 2)(MIP2) [Source:UniProtKB/Swiss-Prot;Acc:P10889]		NULL	TRUE
Tir2-F6	NES16702754	5	91334931	T/C	TT			TT	ENSMUSG00000058427	ENSMUST00000075433	Cxcl2-201	3PRIME_UTR	<0.1			C-X-C motif chemokine 2 Precursor (Macrophage inflammatory protein 2)(MIP2) [Source:UniProtKB/Swiss-Prot;Acc:P10889]		NULL	FALSE
Tir2-F6	NES10436406	5	91463198	G/A	GG				ENSMUSG00000035020	ENSMUST00000041516	Epgn-001	3PRIME_UTR	0.137			Epigen Precursor (Epithelial mitogen)(EPG) [Source:UniProtKB/Swiss-Prot;Acc:Q924X1]		NULL	TRUE
Tir2-F6	NES10436407	5	91463479	C/A	CC				ENSMUSG00000035020	ENSMUST00000041516	Epgn-001	3PRIME_UTR	<0.1			Epigen Precursor (Epithelial mitogen)(EPG) [Source:UniProtKB/Swiss-Prot;Acc:Q924X1]		NULL	TRUE
Tir2-F6	NES10422081	5	91786485	A/G	AA				ENSMUSG00000082361	ENSMUST00000115974	Btc-201	3PRIME_UTR	<0.1			Probetacellulin Precursor [Contains Betacellulin(BTC)] [Source:UniProtKB/Swiss-Prot;Acc:Q05928]		NULL	TRUE
Tir2-F6	NES10422081	5	91786485	A/G	AA				ENSMUSG00000082361	ENSMUST00000121044	Btc-202	3PRIME_UTR	<0.1			Probetacellulin Precursor [Contains Betacellulin(BTC)] [Source:UniProtKB/Swiss-Prot;Acc:Q05928]		NULL	TRUE
Tir2-F6	NES10422082	5	91786791	A/G	AA				ENSMUSG00000082361	ENSMUST00000115974	Btc-201	3PRIME_UTR	<0.1			Probetacellulin Precursor [Contains Betacellulin(BTC)] [Source:UniProtKB/Swiss-Prot;Acc:Q05928]		NULL	TRUE
Tir2-F6	NES10422082	5	91786791	A/G	AA				ENSMUSG00000082361	ENSMUST00000121044	Btc-202	3PRIME_UTR	<0.1			Probetacellulin Precursor [Contains Betacellulin(BTC)] [Source:UniProtKB/Swiss-Prot;Acc:Q05928]		NULL	TRUE
Tir2-F6	NES10422083	5	91786804	G/A	GG				ENSMUSG00000082361	ENSMUST00000115974	Btc-201	3PRIME_UTR	<0.1			Probetacellulin Precursor [Contains Betacellulin(BTC)] [Source:UniProtKB/Swiss-Prot;Acc:Q05928]		NULL	TRUE
Tir2-F6	NES10422083	5	91786804	G/A	GG				ENSMUSG00000082361	ENSMUST00000121044	Btc-202	3PRIME_UTR	<0.1			Probetacellulin Precursor [Contains Betacellulin(BTC)] [Source:UniProtKB/Swiss-Prot;Acc:Q05928]		NULL	TRUE
Tir2-F6	NES10422084	5	91786843	G/A	GG				ENSMUSG00000082361	ENSMUST00000115974	Btc-201	3PRIME_UTR	<0.1			Probetacellulin Precursor [Contains Betacellulin(BTC)] [Source:UniProtKB/Swiss-Prot;Acc:Q05928]		NULL	TRUE
Tir2-F6	NES10422084	5	91786843	G/A	GG				ENSMUSG00000082361	ENSMUST00000121044	Btc-202	3PRIME_UTR	<0.1			Probetacellulin Precursor [Contains Betacellulin(BTC)] [Source:UniProtKB/Swiss-Prot;Acc:Q05928]		NULL	TRUE
Tir2-F6	NES10422085	5	91786889	G/A	GG				ENSMUSG00000082361	ENSMUST00000115974	Btc-201	3PRIME_UTR	<0.1			Probetacellulin Precursor [Contains Betacellulin(BTC)] [Source:UniProtKB/Swiss-Prot;Acc:Q05928]		NULL	TRUE
Tir2-F6	NES10422085	5	91786889	G/A	GG				ENSMUSG00000082361	ENSMUST00000121044	Btc-202	3PRIME_UTR	<0.1			Probetacellulin Precursor [Contains Betacellulin(BTC)] [Source:UniProtKB/Swiss-Prot;Acc:Q05928]		NULL	TRUE
Tir2-F6	NES10422086	5	91786948	G/A	GG				ENSMUSG00000082361	ENSMUST00000115974	Btc-201	3PRIME_UTR	<0.1			Probetacellulin Precursor [Contains Betacellulin(BTC)] [Source:UniProtKB/Swiss-Prot;Acc:Q05928]		NULL	TRUE
Tir2-F6	NES10422086	5	91786948	G/A	GG				ENSMUSG00000082361	ENSMUST00000121044	Btc-202	3PRIME_UTR	<0.1			Probetacellulin Precursor [Contains Betacellulin(BTC)] [Source:UniProtKB/Swiss-Prot;Acc:Q05928]		NULL	TRUE
Tir2-F6	NES10422087	5	91786995	T/C	TT				ENSMUSG00000082361	ENSMUST00000115974	Btc-201	3PRIME_UTR	<0.1			Probetacellulin Precursor [Contains Betacellulin(BTC)] [Source:UniProtKB/Swiss-Prot;Acc:Q05928]		NULL	TRUE
Tir2-F6	NES10422087	5	91786995	T/C	TT				ENSMUSG00000082361	ENSMUST00000121044	Btc-202	3PRIME_UTR	<0.1			Probetacellulin Precursor [Contains Betacellulin(BTC)] [Source:UniProtKB/Swiss-Prot;Acc:Q05928]		NULL	TRUE
Tir2-F6	NES10422088	5	91787025	A/G	AA				ENSMUSG00000082361	ENSMUST00000115974	Btc-201	3PRIME_UTR	<0.1			Probetacellulin Precursor [Contains Betacellulin(BTC)] [Source:UniProtKB/Swiss-Prot;Acc:Q05928]		NULL	TRUE
Tir2-F6	NES10422088	5	91787025	A/G	AA				ENSMUSG00000082361	ENSMUST00000121044	Btc-202	3PRIME_UTR	<0.1			Probetacellulin Precursor [Contains Betacellulin(BTC)] [Source:UniProtKB/Swiss-Prot;Acc:Q05928]		NULL	TRUE
Tir2-F6	NES10422089	5	91787190	G/C	GG				ENSMUSG00000082361	ENSMUST00000115974	Btc-201	3PRIME_UTR	<0.1			Probetacellulin Precursor [Contains Betacellulin(BTC)] [Source:UniProtKB/Swiss-Prot;Acc:Q05928]		NULL	TRUE
Tir2-F6	NES10422089	5	91787190	G/C	GG				ENSMUSG00000082361	ENSMUST00000121044	Btc-202	3PRIME_UTR	<0.1			Probetacellulin Precursor [Contains Betacellulin(BTC)] [Source:UniProtKB/Swiss-Prot;Acc:Q05928]		NULL	TRUE
Tir2-F6	NES10422090	5	91787223	A/C	AA				ENSMUSG00000082361	ENSMUST00000115974	Btc-201	3PRIME_UTR	<0.1			Probetacellulin Precursor [Contains Betacellulin(BTC)] [Source:UniProtKB/Swiss-Prot;Acc:Q05928]		NULL	TRUE
Tir2-F6	NES10422090	5	91787223	A/C	AA				ENSMUSG00000082361	ENSMUST00000121044	Btc-202	3PRIME_UTR	<0.1			Probetacellulin Precursor [Contains Betacellulin(BTC)] [Source:UniProtKB/Swiss-Prot;Acc:Q05928]		NULL	TRUE
Tir2-F6	NES10422091	5	91787236	T/C	TT				ENSMUSG00000082361	ENSMUST00000115974	Btc-201	3PRIME_UTR	<0.1			Probetacellulin Precursor [Contains Betacellulin(BTC)] [Source:UniProtKB/Swiss-Prot;Acc:Q05928]		NULL	TRUE
Tir2-F6	NES10422091	5	91787236	T/C	TT				ENSMUSG00000082361	ENSMUST00000121044	Btc-202	3PRIME_UTR	<0.1			Probetacellulin Precursor [Contains Betacellulin(BTC)] [Source:UniProtKB/Swiss-Prot;Acc:Q05928]		NULL	TRUE
Tir2-F6	NES10422092	5	91787258	G/T	GG				ENSMUSG00000082361	ENSMUST00000115974	Btc-201	3PRIME_UTR	<0.1			Probetacellulin Precursor [Contains Betacellulin(BTC)] [Source:UniProtKB/Swiss-Prot;Acc:Q05928]		NULL	TRUE
Tir2-F6	NES10422092	5	91787258	G/T	GG				ENSMUSG00000082361	ENSMUST00000121044	Btc-202	3PRIME_UTR	<0.1			Probetacellulin Precursor [Contains Betacellulin(BTC)] [Source:UniProtKB/Swiss-Prot;Acc:Q05928]		NULL	TRUE
Tir2-F6	NES10422093	5	91787363	A/C	AA				ENSMUSG00000082361	ENSMUST00000115974	Btc-201	3PRIME_UTR	<0.1			Probetacellulin Precursor [Contains Betacellulin(BTC)] [Source:UniProtKB/Swiss-Prot;Acc:Q05928]		NULL	TRUE
Tir2-F6	NES10422093	5	91787363	A/C	AA				ENSMUSG00000082361	ENSMUST00000121044	Btc-202	3PRIME_UTR	<0.1			Probetacellulin Precursor [Contains Betacellulin(BTC)] [Source:UniProtKB/Swiss-Prot;Acc:Q05928]		NULL	TRUE
Tir2-F6	NES10422094	5	91787504	A/G	AA				ENSMUSG00000082361	ENSMUST00000115974	Btc-201	3PRIME_UTR	<0.1			Probetacellulin Precursor [Contains Betacellulin(BTC)] [Source:UniProtKB/Swiss-Prot;Acc:Q05928]		NULL	TRUE
Tir2-F6	NES10422094	5	91787504	A/G	AA				ENSMUSG00000082361	ENSMUST00000121044	Btc-202	3PRIME_UTR	<0.1			Probetacellulin Precursor [Contains Betacellulin(BTC)] [Source:UniProtKB/Swiss-Prot;Acc:Q05928]		NULL	TRUE
Tir2-F6	NES10422095	5	91787523	C/A	CC				ENSMUSG00000082361	ENSMUST00000115974	Btc-201	3PRIME_UTR	<0.1			Probetacellulin Precursor [Contains Betacellulin(BTC)] [Source:UniProtKB/Swiss-Prot;Acc:Q05928]		NULL	TRUE
Tir2-F6	NES10422095	5	91787523	C/A	CC				ENSMUSG00000082361	ENSMUST00000121044	Btc-202	3PRIME_UTR	<0.1			Probetacellulin Precursor [Contains Betacellulin(BTC)] [Source:UniProtKB/Swiss-Prot;Acc:Q05928]		NULL	TRUE
Tir2-F6	NES10422096	5	91787573	T/C	TT				ENSMUSG00000082361	ENSMUST00000115974	Btc-201	3PRIME_UTR	<0.1			Probetacellulin Precursor [Contains Betacellulin(BTC)] [Source:UniProtKB/Swiss-Prot;Acc:Q05928]		NULL	TRUE
Tir2-F6	NES10422096	5	91787573	T/C	TT				ENSMUSG00000082361	ENSMUST00000121044	Btc-202	3PRIME_UTR	<0.1			Probetacellulin Precursor [Contains Betacellulin(BTC)] [Source:UniProtKB/Swiss-Prot;Acc:Q05928]		NULL	TRUE
Tir2-F6	NES10422097	5	91787607	T/C	TT				ENSMUSG00000082361	ENSMUST00000115974	Btc-201	3PRIME_UTR	<0.1			Probetacellulin Precursor [Contains Betacellulin(BTC)] [Source:UniProtKB/Swiss-Prot;Acc:Q05928]		NULL	TRUE
Tir2-F6	NES10422097	5	91787607	T/C	TT				ENSMUSG00000082361	ENSMUST00000121044	Btc-202	3PRIME_UTR	<0.1			Probetacellulin Precursor [Contains Betacellulin(BTC)] [Source:UniProtKB/Swiss-Prot;Acc:Q05928]		NULL	TRUE
Tir2-F6	NES10422040	5	91788095	G/T	GG				ENSMUSG00000082361	ENSMUST00000115974	Btc-201	3PRIME_UTR	<0.1			Probetacellulin Precursor [Contains Betacellulin(BTC)] [Source:UniProtKB/Swiss-Prot;Acc:Q05928]		NULL	TRUE
Tir2-F6	NES10422040	5	91788095	G/T	GG				ENSMUSG00000082361	ENSMUST00000121044	Btc-202	3PRIME_UTR	<0.1			Probetacellulin Precursor [Contains Betacellulin(BTC)] [Source:UniProtKB/Swiss-Prot;Acc:Q05928]		NULL	TRUE
Tir2-F6	NES10422041	5	91788300	G/T	GG				ENSMUSG00000082361	ENSMUST00000115974	Btc-201	3PRIME_UTR	0.149			Probetacellulin Precursor [Contains Betacellulin(BTC)] [Source:UniProtKB/Swiss-Prot;Acc:Q05928]		NULL	TRUE
Tir2-F6	NES10422041	5	91788300	G/T	GG				ENSMUSG00000082361	ENSMUST00000121044	Btc-202	3PRIME_UTR	0.149			Probetacellulin Precursor [Contains Betacellulin(BTC)] [Source:UniProtKB/Swiss-Prot;Acc:Q05928]		NULL	TRUE
Tir2-F6	NES16701027	5	92235667	G/A	GG				ENSMUSG00000057990	ENSMUST00000075293	AC120381.13-201	WITHIN_NON_CODING_GENE	<0.1			No description		NULL	TRUE
Tir2-F6	NES16701028	5	92235677	G/T	GG				ENSMUSG00000057990	ENSMUST00000075293	AC120381.13-201	WITHIN_NON_CODING_GENE	<0.1			No description		NULL	TRUE
Tir2-F6	NES16701029	5	92235791	T/A	TT				ENSMUSG00000057990	ENSMUST00000075293	AC120381.13-201	WITHIN_NON_CODING_GENE	<0.1			No description		NULL	TRUE
Tir3a-F12	NES12802639	1	125582882	C/A	CC		AA		ENSMUSG00000036815	ENSMUST00000112603	Dpp10-002	SYNONYMOUS_CODING	1			Inactive dipeptidyl peptidase 10 (Dipeptidyl peptidase X) [Source:UniProtKB/Swiss-Prot;Acc:Q6NXK7]		NULL	TRUE
Tir3a-F12	NES12802639	1	125582882	C/A	CC		AA		ENSMUSG00000036815	ENSMUST00000112606	Dpp10-001	SYNONYMOUS_CODING	1			Inactive dipeptidyl peptidase 10 (Dipeptidyl peptidase X) [Source:UniProtKB/Swiss-Prot;Acc:Q6NXK7]		NULL	TRUE
Tir3a-F12	NES12802639	1	125582882	C/A	CC		AA		ENSMUSG00000036815	ENSMUST00000035420	Dpp10-201	SYNONYMOUS_CODING	1			Inactive dipeptidyl peptidase 10 (Dipeptidyl peptidase X) [Source:UniProtKB/Swiss-Prot;Acc:Q6NXK7]		NULL	TRUE
Tir3a-F12	NES14479643	1	125281582	G/A	GG	AA	AA	AA	ENSMUSG00000036815	ENSMUST00000112603	Dpp10-002	SYNONYMOUS_CODING	1			Inactive dipeptidyl peptidase 10 (Dipeptidyl peptidase X) [Source:UniProtKB/Swiss-Prot;Acc:Q6NXK7]		NULL	TRUE
Tir3a-F12	NES14479643	1	125281582	G/A	GG	AA	AA	AA	ENSMUSG00000036815	ENSMUST00000112606	Dpp10-001	SYNONYMOUS_CODING	1			Inactive dipeptidyl peptidase 10 (Dipeptidyl peptidase X) [Source:UniProtKB/Swiss-Prot;Acc:Q6NXK7]		NULL	TRUE
Tir3a-F12	NES14479643	1	125281582	G/A	GG	AA	AA	AA	ENSMUSG00000036815	ENSMUST00000035420	Dpp10-201	SYNONYMOUS_CODING	1			Inactive dipeptidyl peptidase 10 (Dipeptidyl peptidase X) [Source:UniProtKB/Swiss-Prot;Acc:Q6NXK7]		NULL	TRUE
Tir3a-F12	NES14479643	1	125281582	G/A	GG	AA	AA	AA	ENSMUSG00000077472	ENSMUST00000104284	SNORA17	DOWNSTREAM	1			Small nucleolar RNA SNORA17 [Source:RFAM;Acc:RF00560]		NULL	TRUE
Tir3a-F12	NES14479932	1	125274726	T/C	TT	CC	CC	CC	ENSMUSG00000036815	ENSMUST00000112603	Dpp10-002	SYNONYMOUS_CODING	0.997			Inactive dipeptidyl peptidase 10 (Dipeptidyl peptidase X) [Source:UniProtKB/Swiss-Prot;Acc:Q6NXK7]		NULL	TRUE
Tir3a-F12	NES14479932	1	125274726	T/C	TT	CC	CC	CC	ENSMUSG00000036815	ENSMUST00000112606	Dpp10-001	SYNONYMOUS_CODING	0.997			Inactive dipeptidyl peptidase 10 (Dipeptidyl peptidase X) [Source:UniProtKB/Swiss-Prot;Acc:Q6NXK7]		NULL	TRUE
Tir3a-F12	NES14479932	1	125274726	T/C	TT	CC	CC	CC	ENSMUSG00000036815	ENSMUST00000035420	Dpp10-201	SYNONYMOUS_CODING	0.997			Inactive dipeptidyl peptidase 10 (Dipeptidyl peptidase X) [Source:UniProtKB/Swiss-Prot;Acc:Q6NXK7]		NULL	TRUE
Tir3a-F12	NES14481235	1	125238276	A/G	AA	GG	GG	GG	ENSMUSG00000036815	ENSMUST00000112603	Dpp10-002	SYNONYMOUS_CODING	1			Inactive dipeptidyl peptidase 10 (Dipeptidyl peptidase X) [Source:UniProtKB/Swiss-Prot;Acc:Q6NXK7]		NULL	TRUE
Tir3a-F12	NES14481235	1	125238276	A/G	AA	GG	GG	GG	ENSMUSG00000036815	ENSMUST00000112606	Dpp10-001	SYNONYMOUS_CODING	1			Inactive dipeptidyl peptidase 10 (Dipeptidyl peptidase X) [Source:UniProtKB/Swiss-Prot;Acc:Q6NXK7]		NULL	TRUE
Tir3a-F12	NES14481235	1	125238276	A/G	AA	GG	GG	GG	ENSMUSG00000036815	ENSMUST00000035420	Dpp10-201	SYNONYMOUS_CODING	1			Inactive dipeptidyl peptidase 10 (Dipeptidyl peptidase X) [Source:UniProtKB/Swiss-Prot;Acc:Q6NXK7]		NULL	TRUE
Tir3a-F12	NES14481402	1	125229051	C/T	CC	TT	TT	TT	ENSMUSG00000036815	ENSMUST00000112603	Dpp10-002	3PRIME_UTR	0.986			Inactive dipeptidyl peptidase 10 (Dipeptidyl peptidase X) [Source:UniProtKB/Swiss-Prot;Acc:Q6NXK7]		NULL	TRUE
Tir3a-F12	NES14481402	1	125229051	C/T	CC	TT	TT	TT	ENSMUSG00000036815	ENSMUST00000112606	Dpp10-001	3PRIME_UTR	0.986			Inactive dipeptidyl peptidase 10 (Dipeptidyl peptidase X) [Source:UniProtKB/Swiss-Prot;Acc:Q6NXK7]		NULL	TRUE
Tir3a-F12	NES14481402	1	125229051	C/T	CC	TT	TT	TT	ENSMUSG00000036815	ENSMUST00000035420	Dpp10-201	3PRIME_UTR	0.986			Inactive dipeptidyl peptidase 10 (Dipeptidyl peptidase X) [Source:UniProtKB/Swiss-Prot;Acc:Q6NXK7]		NULL	TRUE
Tir3a-F12	NES14481407	1	125229503	T/C	TT	CC	CC	CC	ENSMUSG00000036815	ENSMUST00000112603	Dpp10-002	3PRIME_UTR	0.89			Inactive dipeptidyl peptidase 10 (Dipeptidyl peptidase X) [Source:UniProtKB/Swiss-Prot;Acc:Q6NXK7]		NULL	TRUE
Tir3a-F12	NES14481407	1	125229503	T/C	TT	CC	CC	CC	ENSMUSG00000036815	ENSMUST00000112606	Dpp10-001	3PRIME_UTR	0.89			Inactive dipeptidyl peptidase 10 (Dipeptidyl peptidase X) [Source:UniProtKB/Swiss-Prot;Acc:Q6NXK7]		NULL	TRUE
Tir3a-F12	NES14481407	1	125229503	T/C	TT	CC	CC	CC	ENSMUSG00000036815	ENSMUST00000035420	Dpp10-201	3PRIME_UTR	0.89			Inactive dipeptidyl peptidase 10 (Dipeptidyl peptidase X) [Source:UniProtKB/Swiss-Prot;Acc:Q6NXK7]		NULL	TRUE
Tir3a-F12	NES14481408	1	125229598	C/T	CC		TT	TT	ENSMUSG00000036815	ENSMUST00000112603	Dpp10-002	3PRIME_UTR	0.995			Inactive dipeptidyl peptidase 10 (Dipeptidyl peptidase X) [Source:UniProtKB/Swiss-Prot;Acc:Q6NXK7]		NULL	TRUE
Tir3a-F12	NES14481408	1	125229598	C/T	CC		TT	TT	ENSMUSG00000036815	ENSMUST00000112606	Dpp10-001	3PRIME_UTR	0.995			Inactive dipeptidyl peptidase 10 (Dipeptidyl peptidase X) [Source:UniProtKB/Swiss-Prot;Acc:Q6NXK7]		NULL	TRUE
Tir3a-F12	NES14481408	1	125229598	C/T	CC		TT	TT	ENSMUSG00000036815	ENSMUST00000035420	Dpp10-201	3PRIME_UTR	0.995			Inactive dipeptidyl peptidase 10 (Dipeptidyl peptidase X) [Source:UniProtKB/Swiss-Prot;Acc:Q6NXK7]		NULL	TRUE
Tir3a-F12	NES14481409	1	125229655	G/A	GG	AA	AA	AA	ENSMUSG00000036815	ENSMUST00000112603	Dpp10-002	3PRIME_UTR	0.941			Inactive dipeptidyl peptidase 10 (Dipeptidyl peptidase X) [Source:UniProtKB/Swiss-Prot;Acc:Q6NXK7]		NULL	TRUE
Tir3a-F12	NES14481409	1	125229655	G/A	GG	AA	AA	AA	ENSMUSG00000036815	ENSMUST00000112606	Dpp10-001	3PRIME_UTR	0.941			Inactive dipeptidyl peptidase 10 (Dipeptidyl peptidase X) [Source:UniProtKB/Swiss-Prot;Acc:Q6NXK7]		NULL	TRUE
Tir3a-F12	NES14481409	1	125229655	G/A	GG	AA	AA	AA	ENSMUSG00000036815	ENSMUST00000035420	Dpp10-201	3PRIME_UTR	0.941			Inactive dipeptidyl peptidase 10 (Dipeptidyl peptidase X) [Source:UniProtKB/Swiss-Prot;Acc:Q6NXK7]		NULL	TRUE
Tir3a-F12	NES14481410	1	125229691	T/A	TT	AA	AA	AA	ENSMUSG00000036815	ENSMUST00000112603	Dpp10-002	3PRIME_UTR	0.46			Inactive dipeptidyl peptidase 10 (Dipeptidyl peptidase X) [Source:UniProtKB/Swiss-Prot;Acc:Q6NXK7]		NULL	TRUE
Tir3a-F12	NES14481410	1	125229691	T/A	TT	AA	AA	AA	ENSMUSG00000036815	ENSMUST00000112606	Dpp10-001	3PRIME_UTR	0.46			Inactive dipeptidyl peptidase 10 (Dipeptidyl peptidase X) [Source:UniProtKB/Swiss-Prot;Acc:Q6NXK7]		NULL	TRUE
Tir3a-F12	NES14481410	1	125229691	T/A	TT	AA	AA	AA	ENSMUSG00000036815	ENSMUST00000035420	Dpp10-201	3PRIME_UTR	0.46			Inactive dipeptidyl peptidase 10 (Dipeptidyl peptidase X) [Source:UniProtKB/Swiss-Prot;Acc:Q6NXK7]		NULL	TRUE
Tir3a-F12	NES14481411	1	125229878	C/T	CC			TT	ENSMUSG00000036815	ENSMUST00000112603	Dpp10-002	3PRIME_UTR	1			Inactive dipeptidyl peptidase 10 (Dipeptidyl peptidase X) [Source:UniProtKB/Swiss-Prot;Acc:Q6NXK7]		NULL	TRUE
Tir3a-F12	NES14481411	1	125229878	C/T	CC			TT	ENSMUSG00000036815	ENSMUST00000112606	Dpp10-001	3PRIME_UTR	1			Inactive dipeptidyl peptidase 10 (Dipeptidyl peptidase X) [Source:UniProtKB/Swiss-Prot;Acc:Q6NXK7]		NULL	TRUE
Tir3a-F12	NES14481411	1	125229878	C/T	CC			TT	ENSMUSG00000036815	ENSMUST00000035420	Dpp10-201	3PRIME_UTR	1			Inactive dipeptidyl peptidase 10 (Dipeptidyl peptidase X) [Source:UniProtKB/Swiss-Prot;Acc:Q6NXK7]		NULL	TRUE
Tir3a-F12	NES14481415	1	125230738	A/C	AA	CC	CC	CC	ENSMUSG00000036815	ENSMUST00000112603	Dpp10-002	3PRIME_UTR	0.967			Inactive dipeptidyl peptidase 10 (Dipeptidyl peptidase X) [Source:UniProtKB/Swiss-Prot;Acc:Q6NXK7]		NULL	TRUE
Tir3a-F12	NES14481415	1	125230738	A/C	AA	CC	CC	CC	ENSMUSG00000036815	ENSMUST00000112606	Dpp10-001	3PRIME_UTR	0.967			Inactive dipeptidyl peptidase 10 (Dipeptidyl peptidase X) [Source:UniProtKB/Swiss-Prot;Acc:Q6NXK7]		NULL	TRUE
Tir3a-F12	NES14481415	1	125230738	A/C	AA	CC	CC	CC	ENSMUSG00000036815	ENSMUST00000035420	Dpp10-201	3PRIME_UTR	0.967			Inactive dipeptidyl peptidase 10 (Dipeptidyl peptidase X) [Source:UniProtKB/Swiss-Prot;Acc:Q6NXK7]		NULL	TRUE
Tir3a-F12	NES14481367	1	125941954	C/T	CC			TT	ENSMUSG00000036815	ENSMUST00000112603	Dpp10-002	UPSTREAM	1			Inactive dipeptidyl peptidase 10 (Dipeptidyl peptidase X) [Source:UniProtKB/Swiss-Prot;Acc:Q6NXK7]		NULL	TRUE
Tir3a-F12	NES14481367	1	125941954	C/T	CC			TT	ENSMUSG00000073586	ENSMUST00000097605	AC157770.4-201	UPSTREAM	1			No description		NULL	TRUE
Tir3a-F12	NES14481402	1	125229051	C/T	CC	TT	TT	TT	ENSMUSG00000036815	ENSMUST00000112603	Dpp10-002	3PRIME_UTR	0.986			Inactive dipeptidyl peptidase 10 (Dipeptidyl peptidase X) [Source:UniProtKB/Swiss-Prot;Acc:Q6NXK7]		NULL	TRUE
Tir3a-F12	NES14481402	1	125229051	C/T	CC	TT	TT	TT	ENSMUSG00000036815	ENSMUST00000112606	Dpp10-001	3PRIME_UTR	0.986			Inactive dipeptidyl peptidase 10 (Dipeptidyl peptidase X) [Source:UniProtKB/Swiss-Prot;Acc:Q6NXK7]		NULL	TRUE
Tir3a-F12	NES14481402	1	125229051	C/T	CC	TT	TT	TT	ENSMUSG00000036815	ENSMUST00000035420	Dpp10-201	3PRIME_UTR	0.986			Inactive dipeptidyl peptidase 10 (Dipeptidyl peptidase X) [Source:UniProtKB/Swiss-Prot;Acc:Q6NXK7]		NULL	TRUE
Tir3a-F12	NES14481407	1	125229503	T/C	TT	CC	CC	CC	ENSMUSG00000036815	ENSMUST00000112603	Dpp10-002	3PRIME_UTR	0.89			Inactive dipeptidyl peptidase 10 (Dipeptidyl peptidase X) [Source:UniProtKB/Swiss-Prot;Acc:Q6NXK7]		NULL	TRUE
Tir3a-F12	NES14481407	1	125229503	T/C	TT	CC	CC	CC	ENSMUSG00000036815	ENSMUST00000112606	Dpp10-001	3PRIME_UTR	0.89			Inactive dipeptidyl peptidase 10 (Dipeptidyl peptidase X) [Source:UniProtKB/Swiss-Prot;Acc:Q6NXK7]		NULL	TRUE
Tir3a-F12	NES14481407	1	125229503	T/C	TT	CC	CC	CC	ENSMUSG00000036815	ENSMUST00000035420	Dpp10-201	3PRIME_UTR	0.89			Inactive dipeptidyl peptidase 10 (Dipeptidyl peptidase X) [Source:UniProtKB/Swiss-Prot;Acc:Q6NXK7]		NULL	TRUE
Tir3a-F12	NES14481408	1	125229598	C/T	CC		TT	TT	ENSMUSG00000036815	ENSMUST00000112603	Dpp10-002	3PRIME_UTR	0.995			Inactive dipeptidyl peptidase 10 (Dipeptidyl peptidase X) [Source:UniProtKB/Swiss-Prot;Acc:Q6NXK7]		NULL	TRUE
Tir3a-F12	NES14481408	1	125229598	C/T	CC		TT	TT	ENSMUSG00000036815	ENSMUST00000112606	Dpp10-001	3PRIME_UTR	0.995			Inactive dipeptidyl peptidase 10 (Dipeptidyl peptidase X) [Source:UniProtKB/Swiss-Prot;Acc:Q6NXK7]		NULL	TRUE
Tir3a-F12	NES14481408	1	125229598	C/T	CC		TT	TT	ENSMUSG00000036815	ENSMUST00000035420	Dpp10-201	3PRIME_UTR	0.995			Inactive dipeptidyl peptidase 10 (Dipeptidyl peptidase X) [Source:UniProtKB/Swiss-Prot;Acc:Q6NXK7]		NULL	TRUE
Tir3a-F12	NES14481409	1	125229655	G/A	GG	AA	AA	AA	ENSMUSG00000036815	ENSMUST00000112603	Dpp10-002	3PRIME_UTR	0.941			Inactive dipeptidyl peptidase 10 (Dipeptidyl peptidase X) [Source:UniProtKB/Swiss-Prot;Acc:Q6NXK7]		NULL	TRUE
Tir3a-F12	NES14481409	1	125229655	G/A	GG	AA	AA	AA	ENSMUSG00000036815	ENSMUST00000112606	Dpp10-001	3PRIME_UTR	0.941			Inactive dipeptidyl peptidase 10 (Dipeptidyl peptidase X) [Source:UniProtKB/Swiss-Prot;Acc:Q6NXK7]		NULL	TRUE
Tir3a-F12	NES14481409	1	125229655	G/A	GG	AA	AA	AA	ENSMUSG00000036815	ENSMUST00000035420	Dpp10-201	3PRIME_UTR	0.941			Inactive dipeptidyl peptidase 10 (Dipeptidyl peptidase X) [Source:UniProtKB/Swiss-Prot;Acc:Q6NXK7]		NULL	TRUE
Tir3a-F12	NES14481410	1	125229691	T/A	TT	AA	AA	AA	ENSMUSG00000036815	ENSMUST00000112603	Dpp10-002	3PRIME_UTR	0.46			Inactive dipeptidyl peptidase 10 (Dipeptidyl peptidase X) [Source:UniProtKB/Swiss-Prot;Acc:Q6NXK7]		NULL	TRUE
Tir3a-F12	NES14481410	1	125229691	T/A	TT	AA	AA	AA	ENSMUSG00000036815	ENSMUST00000112606	Dpp10-001	3PRIME_UTR	0.46			Inactive dipeptidyl peptidase 10 (Dipeptidyl peptidase X) [Source:UniProtKB/Swiss-Prot;Acc:Q6NXK7]		NULL	TRUE
Tir3a-F12	NES14481410	1	125229691	T/A	TT	AA	AA	AA	ENSMUSG00000036815	ENSMUST00000035420	Dpp10-201	3PRIME_UTR	0.46			Inactive dipeptidyl peptidase 10 (Dipeptidyl peptidase X) [Source:UniProtKB/Swiss-Prot;Acc:Q6NXK7]		NULL	TRUE
Tir3a-F12	NES14481411	1	125229878	C/T	CC			TT	ENSMUSG00000036815	ENSMUST00000112603	Dpp10-002	3PRIME_UTR	1			Inactive dipeptidyl peptidase 10 (Dipeptidyl peptidase X) [Source:UniProtKB/Swiss-Prot;Acc:Q6NXK7]		NULL	TRUE
Tir3a-F12	NES14481411	1	125229878	C/T	CC			TT	ENSMUSG00000036815	ENSMUST00000112606	Dpp10-001	3PRIME_UTR	1			Inactive dipeptidyl peptidase 10 (Dipeptidyl peptidase X) [Source:UniProtKB/Swiss-Prot;Acc:Q6NXK7]		NULL	TRUE
Tir3a-F12	NES14481411	1	125229878	C/T	CC			TT	ENSMUSG00000036815	ENSMUST00000035420	Dpp10-201	3PRIME_UTR	1			Inactive dipeptidyl peptidase 10 (Dipeptidyl peptidase X) [Source:UniProtKB/Swiss-Prot;Acc:Q6NXK7]		NULL	TRUE
Tir3a-F12	NES14481415	1	125230738	A/C	AA	CC	CC	CC	ENSMUSG00000036815	ENSMUST00000112603	Dpp10-002	3PRIME_UTR	0.967			Inactive dipeptidyl peptidase 10 (Dipeptidyl peptidase X) [Source:UniProtKB/Swiss-Prot;Acc:Q6NXK7]		NULL	TRUE
Tir3a-F12	NES14481415	1	125230738	A/C	AA	CC	CC	CC	ENSMUSG00000036815	ENSMUST00000112606	Dpp10-001	3PRIME_UTR	0.967			Inactive dipeptidyl peptidase 10 (Dipeptidyl peptidase X) [Source:UniProtKB/Swiss-Prot;Acc:Q6NXK7]		NULL	TRUE
Tir3a-F12	NES14481415	1	125230738	A/C	AA	CC	CC	CC	ENSMUSG00000036815	ENSMUST00000035420	Dpp10-201	3PRIME_UTR	0.967			Inactive dipeptidyl peptidase 10 (Dipeptidyl peptidase X) [Source:UniProtKB/Swiss-Prot;Acc:Q6NXK7]		NULL	TRUE
Tir3a-F12	NES14481367	1	125941954	C/T	CC			TT	ENSMUSG00000036815	ENSMUST00000112603	Dpp10-002	UPSTREAM	1			Inactive dipeptidyl peptidase 10 (Dipeptidyl peptidase X) [Source:UniProtKB/Swiss-Prot;Acc:Q6NXK7]		NULL	TRUE
Tir3a-F12	NES14481367	1	125941954	C/T	CC			TT	ENSMUSG00000073586	ENSMUST00000097605	AC157770.4-201	UPSTREAM	1			No description		NULL	TRUE
Tir3a-F12	NES14493233	1	127457768	G/T	GG				ENSMUSG00000026342	ENSMUST00000027580	Slc35f5-201	5PRIME_UTR	0.878			Solute carrier family 35 member F5 [Source:UniProtKB/Swiss-Prot;Acc:Q8R314]		NULL	TRUE
Tir3a-F12	NES14489797	1	127573868	G/T	GG	TT	TT	TT	ENSMUSG00000026343	ENSMUST00000027581	Gpr39-201	5PRIME_UTR	<0.1			G-protein coupled receptor 39 [Source:UniProtKB/Swiss-Prot;Acc:Q5U431]		NULL	TRUE
Tir3a-F12	NES13000150	1	127769077	T/C	TT				ENSMUSG00000026343	ENSMUST00000027581	Gpr39-201	SYNONYMOUS_CODING	0.868			G-protein coupled receptor 39 [Source:UniProtKB/Swiss-Prot;Acc:Q5U431]		NULL	TRUE
Tir3a-F12	NES13000150	1	127769077	T/C	TT				ENSMUSG00000026344	ENSMUST00000027582	Lypd1-201	3PRIME_UTR	0.868			Ly6/PLAUR domain-containing protein 1 Precursor [Source:UniProtKB/Swiss-Prot;Acc:Q8BLC3]		NULL	TRUE
Tir3a-F12	NES13000151	1	127769080	T/C	TT	CC	CC	CC	ENSMUSG00000026343	ENSMUST00000027581	Gpr39-201	SYNONYMOUS_CODING	0.93			G-protein coupled receptor 39 [Source:UniProtKB/Swiss-Prot;Acc:Q5U431]		NULL	TRUE
Tir3a-F12	NES13000151	1	127769080	T/C	TT	CC	CC	CC	ENSMUSG00000026344	ENSMUST00000027582	Lypd1-201	3PRIME_UTR	0.93			Ly6/PLAUR domain-containing protein 1 Precursor [Source:UniProtKB/Swiss-Prot;Acc:Q8BLC3]		NULL	TRUE
Tir3a-F12	NES13000152	1	127769101	T/C	TT	CC	CC	CC	ENSMUSG00000026343	ENSMUST00000027581	Gpr39-201	SYNONYMOUS_CODING	0.697			G-protein coupled receptor 39 [Source:UniProtKB/Swiss-Prot;Acc:Q5U431]		NULL	TRUE
Tir3a-F12	NES13000152	1	127769101	T/C	TT	CC	CC	CC	ENSMUSG00000026344	ENSMUST00000027582	Lypd1-201	3PRIME_UTR	0.697			Ly6/PLAUR domain-containing protein 1 Precursor [Source:UniProtKB/Swiss-Prot;Acc:Q8BLC3]		NULL	TRUE
Tir3a-F12	NES13000153	1	127769278	C/T	CC	TT	TT	TT	ENSMUSG00000026343	ENSMUST00000027581	Gpr39-201	SYNONYMOUS_CODING	<0.1			G-protein coupled receptor 39 [Source:UniProtKB/Swiss-Prot;Acc:Q5U431]		NULL	TRUE
Tir3a-F12	NES13000153	1	127769278	C/T	CC	TT	TT	TT	ENSMUSG00000026344	ENSMUST00000027582	Lypd1-201	3PRIME_UTR	<0.1			Ly6/PLAUR domain-containing protein 1 Precursor [Source:UniProtKB/Swiss-Prot;Acc:Q8BLC3]		NULL	TRUE
Tir3a-F12	NES13000155	1	127769486	C/T	CC	TT	TT	TT	ENSMUSG00000026343	ENSMUST00000027581	Gpr39-201	3PRIME_UTR	<0.1			G-protein coupled receptor 39 [Source:UniProtKB/Swiss-Prot;Acc:Q5U431]		NULL	TRUE
Tir3a-F12	NES13000155	1	127769486	C/T	CC	TT	TT	TT	ENSMUSG00000026344	ENSMUST00000027582	Lypd1-201	3PRIME_UTR	<0.1			Ly6/PLAUR domain-containing protein 1 Precursor [Source:UniProtKB/Swiss-Prot;Acc:Q8BLC3]		NULL	TRUE
Tir3a-F12	NES13000156	1	127769529	G/A	GG	AA	AA	AA	ENSMUSG00000026343	ENSMUST00000027581	Gpr39-201	3PRIME_UTR	<0.1			G-protein coupled receptor 39 [Source:UniProtKB/Swiss-Prot;Acc:Q5U431]		NULL	TRUE
Tir3a-F12	NES13000156	1	127769529	G/A	GG	AA	AA	AA	ENSMUSG00000026344	ENSMUST00000027582	Lypd1-201	3PRIME_UTR	<0.1			Ly6/PLAUR domain-containing protein 1 Precursor [Source:UniProtKB/Swiss-Prot;Acc:Q8BLC3]		NULL	TRUE
Tir3a-F12	NES13000158	1	127769865	C/T	CC	TT	TT	TT	ENSMUSG00000026343	ENSMUST00000027581	Gpr39-201	3PRIME_UTR	<0.1			G-protein coupled receptor 39 [Source:UniProtKB/Swiss-Prot;Acc:Q5U431]		NULL	TRUE
Tir3a-F12	NES13000158	1	127769865	C/T	CC	TT	TT	TT	ENSMUSG00000026344	ENSMUST00000027582	Lypd1-201	3PRIME_UTR	<0.1			Ly6/PLAUR domain-containing protein 1 Precursor [Source:UniProtKB/Swiss-Prot;Acc:Q8BLC3]		NULL	TRUE
Tir3a-F12	NES13000161	1	127769988	A/G	AA			GG	ENSMUSG00000026343	ENSMUST00000027581	Gpr39-201	3PRIME_UTR	0.189			G-protein coupled receptor 39 [Source:UniProtKB/Swiss-Prot;Acc:Q5U431]		NULL	TRUE
Tir3a-F12	NES13000161	1	127769988	A/G	AA			GG	ENSMUSG00000026344	ENSMUST00000027582	Lypd1-201	SYNONYMOUS_CODING	0.189			Ly6/PLAUR domain-containing protein 1 Precursor [Source:UniProtKB/Swiss-Prot;Acc:Q8BLC3]		NULL	TRUE
Tir3a-F12	NES13000162	1	127770048	G/A	GG	AA	AA	AA	ENSMUSG00000026343	ENSMUST00000027581	Gpr39-201	3PRIME_UTR	1			G-protein coupled receptor 39 [Source:UniProtKB/Swiss-Prot;Acc:Q5U431]		NULL	TRUE
Tir3a-F12	NES13000162	1	127770048	G/A	GG	AA	AA	AA	ENSMUSG00000026344	ENSMUST00000027582	Lypd1-201	SYNONYMOUS_CODING	1			Ly6/PLAUR domain-containing protein 1 Precursor [Source:UniProtKB/Swiss-Prot;Acc:Q8BLC3]		NULL	TRUE
Tir3a-F12	NES13000168	1	127770408	G/A	GG	AA	AA	AA	ENSMUSG00000026343	ENSMUST00000027581	Gpr39-201	3PRIME_UTR	<0.1			G-protein coupled receptor 39 [Source:UniProtKB/Swiss-Prot;Acc:Q5U431]		NULL	TRUE
Tir3a-F12	NES13000168	1	127770408	G/A	GG	AA	AA	AA	ENSMUSG00000026344	ENSMUST00000027582	Lypd1-201	INTRONIC	<0.1			Ly6/PLAUR domain-containing protein 1 Precursor [Source:UniProtKB/Swiss-Prot;Acc:Q8BLC3]		NULL	TRUE
Tir3a-F12	NES12989635	1	127808732	C/A	CC	AA	AA		ENSMUSG00000026344	ENSMUST00000027582	Lypd1-201	5PRIME_UTR	<0.1			Ly6/PLAUR domain-containing protein 1 Precursor [Source:UniProtKB/Swiss-Prot;Acc:Q8BLC3]		NULL	TRUE
Tir3a-F12	NES12989635	1	127808732	C/A	CC	AA	AA		ENSMUSG00000049690	ENSMUST00000057846	E030049G20Rik-201	DOWNSTREAM	<0.1			Nck-associated protein 5 isoform 1 [Source:RefSeq peptide;Acc:NP_001075225]		NULL	TRUE
Tir3a-F12	NES12989635	1	127808732	C/A	CC	AA	AA		ENSMUSG00000049690	ENSMUST00000112583	E030049G20Rik-203	DOWNSTREAM	<0.1			Nck-associated protein 5 isoform 1 [Source:RefSeq peptide;Acc:NP_001075225]		NULL	TRUE
Tir3a-F12	NES13000148	1	127768666	T/A	TT	AA	AA	AA	ENSMUSG00000026343	ENSMUST00000027581	Gpr39-201	INTRONIC	0.241			G-protein coupled receptor 39 [Source:UniProtKB/Swiss-Prot;Acc:Q5U431]		NULL	TRUE
Tir3a-F12	NES13000148	1	127768666	T/A	TT	AA	AA	AA	ENSMUSG00000026344	ENSMUST00000027582	Lypd1-201	3PRIME_UTR	0.241			Ly6/PLAUR domain-containing protein 1 Precursor [Source:UniProtKB/Swiss-Prot;Acc:Q8BLC3]		NULL	TRUE
Tir3a-F12	NES13000149	1	127768707	C/G	CC				ENSMUSG00000026343	ENSMUST00000027581	Gpr39-201	INTRONIC	1			G-protein coupled receptor 39 [Source:UniProtKB/Swiss-Prot;Acc:Q5U431]		NULL	TRUE
Tir3a-F12	NES13000149	1	127768707	C/G	CC				ENSMUSG00000026344	ENSMUST00000027582	Lypd1-201	3PRIME_UTR	1			Ly6/PLAUR domain-containing protein 1 Precursor [Source:UniProtKB/Swiss-Prot;Acc:Q8BLC3]		NULL	TRUE
Tir3a-F12	NES13000150	1	127769077	T/C	TT				ENSMUSG00000026343	ENSMUST00000027581	Gpr39-201	SYNONYMOUS_CODING	0.868			G-protein coupled receptor 39 [Source:UniProtKB/Swiss-Prot;Acc:Q5U431]		NULL	TRUE
Tir3a-F12	NES13000150	1	127769077	T/C	TT				ENSMUSG00000026344	ENSMUST00000027582	Lypd1-201	3PRIME_UTR	0.868			Ly6/PLAUR domain-containing protein 1 Precursor [Source:UniProtKB/Swiss-Prot;Acc:Q8BLC3]		NULL	TRUE
Tir3a-F12	NES13000151	1	127769080	T/C	TT	CC	CC	CC	ENSMUSG00000026343	ENSMUST00000027581	Gpr39-201	SYNONYMOUS_CODING	0.93			G-protein coupled receptor 39 [Source:UniProtKB/Swiss-Prot;Acc:Q5U431]		NULL	TRUE
Tir3a-F12	NES13000151	1	127769080	T/C	TT	CC	CC	CC	ENSMUSG00000026344	ENSMUST00000027582	Lypd1-201	3PRIME_UTR	0.93			Ly6/PLAUR domain-containing protein 1 Precursor [Source:UniProtKB/Swiss-Prot;Acc:Q8BLC3]		NULL	TRUE
Tir3a-F12	NES13000152	1	127769101	T/C	TT	CC	CC	CC	ENSMUSG00000026343	ENSMUST00000027581	Gpr39-201	SYNONYMOUS_CODING	0.697			G-protein coupled receptor 39 [Source:UniProtKB/Swiss-Prot;Acc:Q5U431]		NULL	TRUE
Tir3a-F12	NES13000152	1	127769101	T/C	TT	CC	CC	CC	ENSMUSG00000026344	ENSMUST00000027582	Lypd1-201	3PRIME_UTR	0.697			Ly6/PLAUR domain-containing protein 1 Precursor [Source:UniProtKB/Swiss-Prot;Acc:Q8BLC3]		NULL	TRUE
Tir3a-F12	NES13000153	1	127769278	C/T	CC	TT	TT	TT	ENSMUSG00000026343	ENSMUST00000027581	Gpr39-201	SYNONYMOUS_CODING	<0.1			G-protein coupled receptor 39 [Source:UniProtKB/Swiss-Prot;Acc:Q5U431]		NULL	TRUE
Tir3a-F12	NES13000153	1	127769278	C/T	CC	TT	TT	TT	ENSMUSG00000026344	ENSMUST00000027582	Lypd1-201	3PRIME_UTR	<0.1			Ly6/PLAUR domain-containing protein 1 Precursor [Source:UniProtKB/Swiss-Prot;Acc:Q8BLC3]		NULL	TRUE
Tir3a-F12	NES13000155	1	127769486	C/T	CC	TT	TT	TT	ENSMUSG00000026343	ENSMUST00000027581	Gpr39-201	3PRIME_UTR	<0.1			G-protein coupled receptor 39 [Source:UniProtKB/Swiss-Prot;Acc:Q5U431]		NULL	TRUE
Tir3a-F12	NES13000155	1	127769486	C/T	CC	TT	TT	TT	ENSMUSG00000026344	ENSMUST00000027582	Lypd1-201	3PRIME_UTR	<0.1			Ly6/PLAUR domain-containing protein 1 Precursor [Source:UniProtKB/Swiss-Prot;Acc:Q8BLC3]		NULL	TRUE
Tir3a-F12	NES13000156	1	127769529	G/A	GG	AA	AA	AA	ENSMUSG00000026343	ENSMUST00000027581	Gpr39-201	3PRIME_UTR	<0.1			G-protein coupled receptor 39 [Source:UniProtKB/Swiss-Prot;Acc:Q5U431]		NULL	TRUE
Tir3a-F12	NES13000156	1	127769529	G/A	GG	AA	AA	AA	ENSMUSG00000026344	ENSMUST00000027582	Lypd1-201	3PRIME_UTR	<0.1			Ly6/PLAUR domain-containing protein 1 Precursor [Source:UniProtKB/Swiss-Prot;Acc:Q8BLC3]		NULL	TRUE
Tir3a-F12	NES13000158	1	127769865	C/T	CC	TT	TT	TT	ENSMUSG00000026343	ENSMUST00000027581	Gpr39-201	3PRIME_UTR	<0.1			G-protein coupled receptor 39 [Source:UniProtKB/Swiss-Prot;Acc:Q5U431]		NULL	TRUE
Tir3a-F12	NES13000158	1	127769865	C/T	CC	TT	TT	TT	ENSMUSG00000026344	ENSMUST00000027582	Lypd1-201	3PRIME_UTR	<0.1			Ly6/PLAUR domain-containing protein 1 Precursor [Source:UniProtKB/Swiss-Prot;Acc:Q8BLC3]		NULL	TRUE
Tir3a-F12	NES13000161	1	127769988	A/G	AA			GG	ENSMUSG00000026343	ENSMUST00000027581	Gpr39-201	3PRIME_UTR	0.189			G-protein coupled receptor 39 [Source:UniProtKB/Swiss-Prot;Acc:Q5U431]		NULL	TRUE
Tir3a-F12	NES13000161	1	127769988	A/G	AA			GG	ENSMUSG00000026344	ENSMUST00000027582	Lypd1-201	SYNONYMOUS_CODING	0.189			Ly6/PLAUR domain-containing protein 1 Precursor [Source:UniProtKB/Swiss-Prot;Acc:Q8BLC3]		NULL	TRUE
Tir3a-F12	NES13000162	1	127770048	G/A	GG	AA	AA	AA	ENSMUSG00000026343	ENSMUST00000027581	Gpr39-201	3PRIME_UTR	1			G-protein coupled receptor 39 [Source:UniProtKB/Swiss-Prot;Acc:Q5U431]		NULL	TRUE
Tir3a-F12	NES13000162	1	127770048	G/A	GG	AA	AA	AA	ENSMUSG00000026344	ENSMUST00000027582	Lypd1-201	SYNONYMOUS_CODING	1			Ly6/PLAUR domain-containing protein 1 Precursor [Source:UniProtKB/Swiss-Prot;Acc:Q8BLC3]		NULL	TRUE
Tir3a-F12	NES16466682	1	128389134	G/A	GG	AA	AA	AA	ENSMUSG00000049690	ENSMUST00000057846	E030049G20Rik-201	NON_SYNONYMOUS_CODING	0.981	benign	0	Nck-associated protein 5 isoform 1 [Source:RefSeq peptide;Acc:NP_001075225]		371	TRUE
Tir3a-F12	NES16466682	1	128389134	G/A	GG	AA	AA	AA	ENSMUSG00000049690	ENSMUST00000112583	E030049G20Rik-203	INTRONIC	0.981			Nck-associated protein 5 isoform 1 [Source:RefSeq peptide;Acc:NP_001075225]		NULL	TRUE
Tir3a-F12	NES12989657	1	127810549	A/C	AA	CC	CC	CC	ENSMUSG00000026344	ENSMUST00000027582	Lypd1-201	UPSTREAM	<0.1			Ly6/PLAUR domain-containing protein 1 Precursor [Source:UniProtKB/Swiss-Prot;Acc:Q8BLC3]		NULL	TRUE
Tir3a-F12	NES12989657	1	127810549	A/C	AA	CC	CC	CC	ENSMUSG00000049690	ENSMUST00000057846	E030049G20Rik-201	3PRIME_UTR	<0.1			Nck-associated protein 5 isoform 1 [Source:RefSeq peptide;Acc:NP_001075225]		NULL	TRUE
Tir3a-F12	NES12989657	1	127810549	A/C	AA	CC	CC	CC	ENSMUSG00000049690	ENSMUST00000112583	E030049G20Rik-203	3PRIME_UTR	<0.1			Nck-associated protein 5 isoform 1 [Source:RefSeq peptide;Acc:NP_001075225]		NULL	TRUE
Tir3a-F12	NES16467320	1	128364802	C/T	CC	TT	TT	TT	ENSMUSG00000049690	ENSMUST00000057846	E030049G20Rik-201	INTRONIC	<0.1			Nck-associated protein 5 isoform 1 [Source:RefSeq peptide;Acc:NP_001075225]		NULL	TRUE
Tir3a-F12	NES16467320	1	128364802	C/T	CC	TT	TT	TT	ENSMUSG00000049690	ENSMUST00000112583	E030049G20Rik-203	INTRONIC	<0.1			Nck-associated protein 5 isoform 1 [Source:RefSeq peptide;Acc:NP_001075225]		NULL	TRUE
Tir3a-F12	NES16467320	1	128364802	C/T	CC	TT	TT	TT	ENSMUSG00000080345	ENSMUST00000116695	AC164156.2-201	UPSTREAM	<0.1			No description		NULL	TRUE
Tir3a-F12	NES16463568	1	128421703	C/T	CC	TT	TT	TT	ENSMUSG00000049690	ENSMUST00000112583	E030049G20Rik-203	INTRONIC	0.133			Nck-associated protein 5 isoform 1 [Source:RefSeq peptide;Acc:NP_001075225]		NULL	TRUE
Tir3a-F12	NES16463568	1	128421703	C/T	CC	TT	TT	TT	ENSMUSG00000070689	ENSMUST00000094609	AC160965.4-201	3PRIME_UTR	0.133			Putative uncharacterized protein [Source:UniProtKB/TrEMBL;Acc:Q8C9K4]		NULL	TRUE
Tir3a-F12	NES16463569	1	128421720	A/G	AA			GG	ENSMUSG00000049690	ENSMUST00000112583	E030049G20Rik-203	INTRONIC	<0.1			Nck-associated protein 5 isoform 1 [Source:RefSeq peptide;Acc:NP_001075225]		NULL	TRUE
Tir3a-F12	NES16463569	1	128421720	A/G	AA			GG	ENSMUSG00000070689	ENSMUST00000094609	AC160965.4-201	3PRIME_UTR	<0.1			Putative uncharacterized protein [Source:UniProtKB/TrEMBL;Acc:Q8C9K4]		NULL	TRUE
Tir3a-F12	NES16463570	1	128421735	T/C	TT				ENSMUSG00000049690	ENSMUST00000112583	E030049G20Rik-203	INTRONIC	<0.1			Nck-associated protein 5 isoform 1 [Source:RefSeq peptide;Acc:NP_001075225]		NULL	TRUE
Tir3a-F12	NES16463570	1	128421735	T/C	TT				ENSMUSG00000070689	ENSMUST00000094609	AC160965.4-201	3PRIME_UTR	<0.1			Putative uncharacterized protein [Source:UniProtKB/TrEMBL;Acc:Q8C9K4]		NULL	TRUE
Tir3a-F12	NES16463571	1	128421756	G/A	GG				ENSMUSG00000049690	ENSMUST00000112583	E030049G20Rik-203	INTRONIC	0.264			Nck-associated protein 5 isoform 1 [Source:RefSeq peptide;Acc:NP_001075225]		NULL	TRUE
Tir3a-F12	NES16463571	1	128421756	G/A	GG				ENSMUSG00000070689	ENSMUST00000094609	AC160965.4-201	3PRIME_UTR	0.264			Putative uncharacterized protein [Source:UniProtKB/TrEMBL;Acc:Q8C9K4]		NULL	TRUE
Tir3a-F12	NES16463573	1	128422163	T/C	TT				ENSMUSG00000049690	ENSMUST00000112583	E030049G20Rik-203	INTRONIC	<0.1			Nck-associated protein 5 isoform 1 [Source:RefSeq peptide;Acc:NP_001075225]		NULL	TRUE
Tir3a-F12	NES16463573	1	128422163	T/C	TT				ENSMUSG00000070689	ENSMUST00000094609	AC160965.4-201	3PRIME_UTR	<0.1			Putative uncharacterized protein [Source:UniProtKB/TrEMBL;Acc:Q8C9K4]		NULL	TRUE
Tir3a-F12	NES16463574	1	128422245	G/A	GG	AA	AA	AA	ENSMUSG00000049690	ENSMUST00000112583	E030049G20Rik-203	INTRONIC	<0.1			Nck-associated protein 5 isoform 1 [Source:RefSeq peptide;Acc:NP_001075225]		NULL	TRUE
Tir3a-F12	NES16463574	1	128422245	G/A	GG	AA	AA	AA	ENSMUSG00000070689	ENSMUST00000094609	AC160965.4-201	3PRIME_UTR	<0.1			Putative uncharacterized protein [Source:UniProtKB/TrEMBL;Acc:Q8C9K4]		NULL	TRUE
Tir3a-F12	NES16463500	1	128423265	A/G	AA				ENSMUSG00000049690	ENSMUST00000112583	E030049G20Rik-203	INTRONIC	<0.1			Nck-associated protein 5 isoform 1 [Source:RefSeq peptide;Acc:NP_001075225]		NULL	TRUE
Tir3a-F12	NES16463500	1	128423265	A/G	AA				ENSMUSG00000070689	ENSMUST00000094609	AC160965.4-201	3PRIME_UTR	<0.1			Putative uncharacterized protein [Source:UniProtKB/TrEMBL;Acc:Q8C9K4]		NULL	TRUE
Tir3a-F12	NES16463501	1	128423281	T/G	TT	GG	GG	GG	ENSMUSG00000049690	ENSMUST00000112583	E030049G20Rik-203	INTRONIC	<0.1			Nck-associated protein 5 isoform 1 [Source:RefSeq peptide;Acc:NP_001075225]		NULL	TRUE
Tir3a-F12	NES16463501	1	128423281	T/G	TT	GG	GG	GG	ENSMUSG00000070689	ENSMUST00000094609	AC160965.4-201	3PRIME_UTR	<0.1			Putative uncharacterized protein [Source:UniProtKB/TrEMBL;Acc:Q8C9K4]		NULL	TRUE
Tir3a-F12	NES16463502	1	128423328	T/C	TT				ENSMUSG00000049690	ENSMUST00000112583	E030049G20Rik-203	INTRONIC	<0.1			Nck-associated protein 5 isoform 1 [Source:RefSeq peptide;Acc:NP_001075225]		NULL	TRUE
Tir3a-F12	NES16463502	1	128423328	T/C	TT				ENSMUSG00000070689	ENSMUST00000094609	AC160965.4-201	3PRIME_UTR	<0.1			Putative uncharacterized protein [Source:UniProtKB/TrEMBL;Acc:Q8C9K4]		NULL	TRUE
Tir3a-F12	NES16463503	1	128423449	T/A	TT	AA	AA	AA	ENSMUSG00000049690	ENSMUST00000112583	E030049G20Rik-203	INTRONIC	<0.1			Nck-associated protein 5 isoform 1 [Source:RefSeq peptide;Acc:NP_001075225]		NULL	TRUE
Tir3a-F12	NES16463503	1	128423449	T/A	TT	AA	AA	AA	ENSMUSG00000070689	ENSMUST00000094609	AC160965.4-201	3PRIME_UTR	<0.1			Putative uncharacterized protein [Source:UniProtKB/TrEMBL;Acc:Q8C9K4]		NULL	TRUE
Tir3a-F12	NES16463504	1	128423467	C/A	CC	AA	AA	AA	ENSMUSG00000049690	ENSMUST00000112583	E030049G20Rik-203	INTRONIC	<0.1			Nck-associated protein 5 isoform 1 [Source:RefSeq peptide;Acc:NP_001075225]		NULL	TRUE
Tir3a-F12	NES16463504	1	128423467	C/A	CC	AA	AA	AA	ENSMUSG00000070689	ENSMUST00000094609	AC160965.4-201	3PRIME_UTR	<0.1			Putative uncharacterized protein [Source:UniProtKB/TrEMBL;Acc:Q8C9K4]		NULL	TRUE
Tir3a-F12	NES16463506	1	128423523	T/A	TT	AA	AA	AA	ENSMUSG00000049690	ENSMUST00000112583	E030049G20Rik-203	INTRONIC	<0.1			Nck-associated protein 5 isoform 1 [Source:RefSeq peptide;Acc:NP_001075225]		NULL	TRUE
Tir3a-F12	NES16463506	1	128423523	T/A	TT	AA	AA	AA	ENSMUSG00000070689	ENSMUST00000094609	AC160965.4-201	3PRIME_UTR	<0.1			Putative uncharacterized protein [Source:UniProtKB/TrEMBL;Acc:Q8C9K4]		NULL	TRUE
Tir3a-F12	NES16463507	1	128423541	A/G	AA	GG	GG	GG	ENSMUSG00000049690	ENSMUST00000112583	E030049G20Rik-203	INTRONIC	<0.1			Nck-associated protein 5 isoform 1 [Source:RefSeq peptide;Acc:NP_001075225]		NULL	TRUE
Tir3a-F12	NES16463507	1	128423541	A/G	AA	GG	GG	GG	ENSMUSG00000070689	ENSMUST00000094609	AC160965.4-201	3PRIME_UTR	<0.1			Putative uncharacterized protein [Source:UniProtKB/TrEMBL;Acc:Q8C9K4]		NULL	TRUE
Tir3a-F12	NES16463508	1	128423572	T/G	TT	GG	GG	GG	ENSMUSG00000049690	ENSMUST00000112583	E030049G20Rik-203	INTRONIC	<0.1			Nck-associated protein 5 isoform 1 [Source:RefSeq peptide;Acc:NP_001075225]		NULL	TRUE
Tir3a-F12	NES16463508	1	128423572	T/G	TT	GG	GG	GG	ENSMUSG00000070689	ENSMUST00000094609	AC160965.4-201	3PRIME_UTR	<0.1			Putative uncharacterized protein [Source:UniProtKB/TrEMBL;Acc:Q8C9K4]		NULL	TRUE
Tir3a-F12	NES16463509	1	128423592	G/A	GG	AA	AA	AA	ENSMUSG00000049690	ENSMUST00000112583	E030049G20Rik-203	INTRONIC	<0.1			Nck-associated protein 5 isoform 1 [Source:RefSeq peptide;Acc:NP_001075225]		NULL	TRUE
Tir3a-F12	NES16463509	1	128423592	G/A	GG	AA	AA	AA	ENSMUSG00000070689	ENSMUST00000094609	AC160965.4-201	3PRIME_UTR	<0.1			Putative uncharacterized protein [Source:UniProtKB/TrEMBL;Acc:Q8C9K4]		NULL	TRUE
Tir3a-F12	NES16463510	1	128423626	C/T	CC	TT	TT	TT	ENSMUSG00000049690	ENSMUST00000112583	E030049G20Rik-203	INTRONIC	<0.1			Nck-associated protein 5 isoform 1 [Source:RefSeq peptide;Acc:NP_001075225]		NULL	TRUE
Tir3a-F12	NES16463510	1	128423626	C/T	CC	TT	TT	TT	ENSMUSG00000070689	ENSMUST00000094609	AC160965.4-201	3PRIME_UTR	<0.1			Putative uncharacterized protein [Source:UniProtKB/TrEMBL;Acc:Q8C9K4]		NULL	TRUE
Tir3a-F12	NES16463511	1	128423688	T/C	TT	CC	CC	CC	ENSMUSG00000049690	ENSMUST00000112583	E030049G20Rik-203	INTRONIC	<0.1			Nck-associated protein 5 isoform 1 [Source:RefSeq peptide;Acc:NP_001075225]		NULL	TRUE
Tir3a-F12	NES16463511	1	128423688	T/C	TT	CC	CC	CC	ENSMUSG00000070689	ENSMUST00000094609	AC160965.4-201	3PRIME_UTR	<0.1			Putative uncharacterized protein [Source:UniProtKB/TrEMBL;Acc:Q8C9K4]		NULL	TRUE
Tir3a-F12	NES16463512	1	128423758	A/G	AA	GG	GG	GG	ENSMUSG00000049690	ENSMUST00000112583	E030049G20Rik-203	INTRONIC	<0.1			Nck-associated protein 5 isoform 1 [Source:RefSeq peptide;Acc:NP_001075225]		NULL	TRUE
Tir3a-F12	NES16463512	1	128423758	A/G	AA	GG	GG	GG	ENSMUSG00000070689	ENSMUST00000094609	AC160965.4-201	3PRIME_UTR	<0.1			Putative uncharacterized protein [Source:UniProtKB/TrEMBL;Acc:Q8C9K4]		NULL	TRUE
Tir3a-F12	NES16463514	1	128423984	C/T	CC	TT	TT	TT	ENSMUSG00000049690	ENSMUST00000112583	E030049G20Rik-203	INTRONIC	<0.1			Nck-associated protein 5 isoform 1 [Source:RefSeq peptide;Acc:NP_001075225]		NULL	TRUE
Tir3a-F12	NES16463514	1	128423984	C/T	CC	TT	TT	TT	ENSMUSG00000070689	ENSMUST00000094609	AC160965.4-201	3PRIME_UTR	<0.1			Putative uncharacterized protein [Source:UniProtKB/TrEMBL;Acc:Q8C9K4]		NULL	TRUE
Tir3a-F12	NES16463516	1	128424029	C/A	CC	AA	AA	AA	ENSMUSG00000049690	ENSMUST00000112583	E030049G20Rik-203	INTRONIC	<0.1			Nck-associated protein 5 isoform 1 [Source:RefSeq peptide;Acc:NP_001075225]		NULL	TRUE
Tir3a-F12	NES16463516	1	128424029	C/A	CC	AA	AA	AA	ENSMUSG00000070689	ENSMUST00000094609	AC160965.4-201	3PRIME_UTR	<0.1			Putative uncharacterized protein [Source:UniProtKB/TrEMBL;Acc:Q8C9K4]		NULL	TRUE
Tir3a-F12	NES16463466	1	128425031	A/G	AA	GG	GG	GG	ENSMUSG00000049690	ENSMUST00000112583	E030049G20Rik-203	INTRONIC	<0.1			Nck-associated protein 5 isoform 1 [Source:RefSeq peptide;Acc:NP_001075225]		NULL	TRUE
Tir3a-F12	NES16463466	1	128425031	A/G	AA	GG	GG	GG	ENSMUSG00000070689	ENSMUST00000094609	AC160965.4-201	SYNONYMOUS_CODING	<0.1			Putative uncharacterized protein [Source:UniProtKB/TrEMBL;Acc:Q8C9K4]		NULL	TRUE
Tir3a-F12	NES16463467	1	128425123	A/C	AA	CC	CC	CC	ENSMUSG00000049690	ENSMUST00000112583	E030049G20Rik-203	INTRONIC	0.147			Nck-associated protein 5 isoform 1 [Source:RefSeq peptide;Acc:NP_001075225]		NULL	TRUE
Tir3a-F12	NES14486275	1	129279557	T/C	TT				ENSMUSG00000036155	ENSMUST00000038361	Mgat5-201	SYNONYMOUS_CODING	0.998			Alpha-1,6-mannosylglycoprotein 6-beta-N-acetylglucosaminyltransferase A (EC 2.4.1.155)(Mannoside acetylglucosaminyltransferase 5)(Alpha-mannoside beta-1,6-N-acetylglucosaminyltransferase)(N-acetylglucosaminyl-transferase V)(GlcNAc-T V)(GNT-V) [Source		NULL	TRUE
Tir3a-F12	NES14486174	1	129281407	T/A	TT				ENSMUSG00000036155	ENSMUST00000038361	Mgat5-201	SYNONYMOUS_CODING	0.998			Alpha-1,6-mannosylglycoprotein 6-beta-N-acetylglucosaminyltransferase A (EC 2.4.1.155)(Mannoside acetylglucosaminyltransferase 5)(Alpha-mannoside beta-1,6-N-acetylglucosaminyltransferase)(N-acetylglucosaminyl-transferase V)(GlcNAc-T V)(GNT-V) [Source		NULL	TRUE
Tir3a-F12	NES14486175	1	129281470	G/A	GG				ENSMUSG00000036155	ENSMUST00000038361	Mgat5-201	SYNONYMOUS_CODING	0.961			Alpha-1,6-mannosylglycoprotein 6-beta-N-acetylglucosaminyltransferase A (EC 2.4.1.155)(Mannoside acetylglucosaminyltransferase 5)(Alpha-mannoside beta-1,6-N-acetylglucosaminyltransferase)(N-acetylglucosaminyl-transferase V)(GlcNAc-T V)(GNT-V) [Source		NULL	TRUE
Tir3a-F12	NES14486083	1	129283970	G/A	GG				ENSMUSG00000036155	ENSMUST00000038361	Mgat5-201	SYNONYMOUS_CODING	1			Alpha-1,6-mannosylglycoprotein 6-beta-N-acetylglucosaminyltransferase A (EC 2.4.1.155)(Mannoside acetylglucosaminyltransferase 5)(Alpha-mannoside beta-1,6-N-acetylglucosaminyltransferase)(N-acetylglucosaminyl-transferase V)(GlcNAc-T V)(GNT-V) [Source		NULL	TRUE
Tir3a-F12	NES14486086	1	129284066	G/A	GG				ENSMUSG00000036155	ENSMUST00000038361	Mgat5-201	SYNONYMOUS_CODING	1			Alpha-1,6-mannosylglycoprotein 6-beta-N-acetylglucosaminyltransferase A (EC 2.4.1.155)(Mannoside acetylglucosaminyltransferase 5)(Alpha-mannoside beta-1,6-N-acetylglucosaminyltransferase)(N-acetylglucosaminyl-transferase V)(GlcNAc-T V)(GNT-V) [Source		NULL	TRUE
Tir3a-F12	NES14485896	1	129294141	C/T	CC				ENSMUSG00000036155	ENSMUST00000038361	Mgat5-201	SYNONYMOUS_CODING	0.585			Alpha-1,6-mannosylglycoprotein 6-beta-N-acetylglucosaminyltransferase A (EC 2.4.1.155)(Mannoside acetylglucosaminyltransferase 5)(Alpha-mannoside beta-1,6-N-acetylglucosaminyltransferase)(N-acetylglucosaminyl-transferase V)(GlcNAc-T V)(GNT-V) [Source		NULL	TRUE
Tir3a-F12	NES14484283	1	129365804	C/T	CC				ENSMUSG00000036155	ENSMUST00000038361	Mgat5-201	SYNONYMOUS_CODING	0.995			Alpha-1,6-mannosylglycoprotein 6-beta-N-acetylglucosaminyltransferase A (EC 2.4.1.155)(Mannoside acetylglucosaminyltransferase 5)(Alpha-mannoside beta-1,6-N-acetylglucosaminyltransferase)(N-acetylglucosaminyl-transferase V)(GlcNAc-T V)(GNT-V) [Source		NULL	TRUE
Tir3a-F12	NES14484284	1	129365874	T/C	TT				ENSMUSG00000036155	ENSMUST00000038361	Mgat5-201	SYNONYMOUS_CODING	1			Alpha-1,6-mannosylglycoprotein 6-beta-N-acetylglucosaminyltransferase A (EC 2.4.1.155)(Mannoside acetylglucosaminyltransferase 5)(Alpha-mannoside beta-1,6-N-acetylglucosaminyltransferase)(N-acetylglucosaminyl-transferase V)(GlcNAc-T V)(GNT-V) [Source		NULL	TRUE
Tir3a-F12	NES16472124	1	129663346	T/C	TT				ENSMUSG00000026348	ENSMUST00000038006	Acmsd-201	3PRIME_UTR	<0.1			2-amino-3-carboxymuconate-6-semialdehyde decarboxylase (EC 4.1.1.45) [Source:UniProtKB/Swiss-Prot;Acc:Q8R519]		NULL	TRUE
Tir3a-F12	NES16472127	1	129663517	C/A	CC				ENSMUSG00000026348	ENSMUST00000038006	Acmsd-201	3PRIME_UTR	<0.1			2-amino-3-carboxymuconate-6-semialdehyde decarboxylase (EC 4.1.1.45) [Source:UniProtKB/Swiss-Prot;Acc:Q8R519]		NULL	TRUE
Tir3a-F12	NES16472129	1	129663596	T/G	TT				ENSMUSG00000026348	ENSMUST00000038006	Acmsd-201	3PRIME_UTR	<0.1			2-amino-3-carboxymuconate-6-semialdehyde decarboxylase (EC 4.1.1.45) [Source:UniProtKB/Swiss-Prot;Acc:Q8R519]		NULL	TRUE
Tir3a-F12	NES16472074	1	129664101	G/A	GG				ENSMUSG00000026348	ENSMUST00000038006	Acmsd-201	3PRIME_UTR	<0.1			2-amino-3-carboxymuconate-6-semialdehyde decarboxylase (EC 4.1.1.45) [Source:UniProtKB/Swiss-Prot;Acc:Q8R519]		NULL	TRUE
Tir3a-F12	NES16471482	1	129699717	A/G	AA	GG	GG	GG	ENSMUSG00000026349	ENSMUST00000112570	Ccnt2-002	NON_SYNONYMOUS_CODING	0.994	benign	0.103	cyclin T2 [Source:RefSeq peptide;Acc:NP_082675]		585	TRUE
Tir3a-F12	NES16471482	1	129699717	A/G	AA	GG	GG	GG	ENSMUSG00000026349	ENSMUST00000027587	Ccnt2-001	NON_SYNONYMOUS_CODING	0.994	benign	0.103	cyclin T2 [Source:RefSeq peptide;Acc:NP_082675]		585	TRUE
Tir3a-F12	NES16471482	1	129699717	A/G	AA	GG	GG	GG	ENSMUSG00000026349	ENSMUST00000112570	Ccnt2-002	NON_SYNONYMOUS_CODING	0.994	benign	0.103	cyclin T2 [Source:RefSeq peptide;Acc:NP_082675]		585	TRUE
Tir3a-F12	NES16471482	1	129699717	A/G	AA	GG	GG	GG	ENSMUSG00000026349	ENSMUST00000027587	Ccnt2-001	NON_SYNONYMOUS_CODING	0.994	benign	0.103	cyclin T2 [Source:RefSeq peptide;Acc:NP_082675]		585	TRUE
Tir3a-F12	NES16470362	1	129785844	A/G	AA	GG	GG	GG	ENSMUSG00000036104	ENSMUST00000037649	Rab3gap1-001	NON_SYNONYMOUS_CODING	1	possibly damaging	1.82	Rab3 GTPase-activating protein catalytic subunit (RAB3 GTPase-activating protein 130 kDa subunit)(Rab3-GAP p130)(Rab3-GAP) [Source:UniProtKB/Swiss-Prot;Acc:Q80UJ7]		88	TRUE
Tir3a-F12	NES16469802	1	129824591	T/A	TT	AA	AA	AA	ENSMUSG00000036104	ENSMUST00000037649	Rab3gap1-001	SYNONYMOUS_CODING	1			Rab3 GTPase-activating protein catalytic subunit (RAB3 GTPase-activating protein 130 kDa subunit)(Rab3-GAP p130)(Rab3-GAP) [Source:UniProtKB/Swiss-Prot;Acc:Q80UJ7]		NULL	TRUE
Tir3a-F12	NES16469524	1	129839661	C/T	CC	TT	TT	TT	ENSMUSG00000036104	ENSMUST00000037649	Rab3gap1-001	3PRIME_UTR	<0.1			Rab3 GTPase-activating protein catalytic subunit (RAB3 GTPase-activating protein 130 kDa subunit)(Rab3-GAP p130)(Rab3-GAP) [Source:UniProtKB/Swiss-Prot;Acc:Q80UJ7]		NULL	TRUE
Tir3a-F12	NES16469533	1	129840444	T/C	TT	CC	CC	CC	ENSMUSG00000036104	ENSMUST00000037649	Rab3gap1-001	SPLICE_SITE	0.441			Rab3 GTPase-activating protein catalytic subunit (RAB3 GTPase-activating protein 130 kDa subunit)(Rab3-GAP p130)(Rab3-GAP) [Source:UniProtKB/Swiss-Prot;Acc:Q80UJ7]		NULL	TRUE
Tir3a-F12	NES16469533	1	129840444	T/C	TT	CC	CC	CC	ENSMUSG00000036104	ENSMUST00000037649	Rab3gap1-001	3PRIME_UTR	0.441			Rab3 GTPase-activating protein catalytic subunit (RAB3 GTPase-activating protein 130 kDa subunit)(Rab3-GAP p130)(Rab3-GAP) [Source:UniProtKB/Swiss-Prot;Acc:Q80UJ7]		NULL	TRUE
Tir3a-F12	NES16469085	1	129856396	T/C	TT	CC	CC	CC	ENSMUSG00000036086	ENSMUST00000086614	Zranb3-001	NON_SYNONYMOUS_CODING	0.163	benign	0.225	Zinc finger Ran-binding domain-containing protein 3 (EC 3.6.1.-) [Source:UniProtKB/Swiss-Prot;Acc:Q6NZP1]		3033	TRUE
Tir3a-F12	NES16469085	1	129856396	T/C	TT	CC	CC	CC	ENSMUSG00000036086	ENSMUST00000112539	Zranb3-203	3PRIME_UTR	0.163			Zinc finger Ran-binding domain-containing protein 3 (EC 3.6.1.-) [Source:UniProtKB/Swiss-Prot;Acc:Q6NZP1]		NULL	TRUE
Tir3a-F12	NES16469088	1	129856673	T/G	TT	GG	GG	GG	ENSMUSG00000036086	ENSMUST00000086614	Zranb3-001	NON_SYNONYMOUS_CODING	<0.1	benign	0.176	Zinc finger Ran-binding domain-containing protein 3 (EC 3.6.1.-) [Source:UniProtKB/Swiss-Prot;Acc:Q6NZP1]		2756	TRUE
Tir3a-F12	NES16469088	1	129856673	T/G	TT	GG	GG	GG	ENSMUSG00000036086	ENSMUST00000112539	Zranb3-203	3PRIME_UTR	<0.1			Zinc finger Ran-binding domain-containing protein 3 (EC 3.6.1.-) [Source:UniProtKB/Swiss-Prot;Acc:Q6NZP1]		NULL	TRUE
Tir3a-F12	NES16469085	1	129856396	T/C	TT	CC	CC	CC	ENSMUSG00000036086	ENSMUST00000086614	Zranb3-001	NON_SYNONYMOUS_CODING	0.163	benign	0.225	Zinc finger Ran-binding domain-containing protein 3 (EC 3.6.1.-) [Source:UniProtKB/Swiss-Prot;Acc:Q6NZP1]		3033	TRUE
Tir3a-F12	NES16469085	1	129856396	T/C	TT	CC	CC	CC	ENSMUSG00000036086	ENSMUST00000112539	Zranb3-203	3PRIME_UTR	0.163			Zinc finger Ran-binding domain-containing protein 3 (EC 3.6.1.-) [Source:UniProtKB/Swiss-Prot;Acc:Q6NZP1]		NULL	TRUE
Tir3a-F12	NES16469088	1	129856673	T/G	TT	GG	GG	GG	ENSMUSG00000036086	ENSMUST00000086614	Zranb3-001	NON_SYNONYMOUS_CODING	<0.1	benign	0.176	Zinc finger Ran-binding domain-containing protein 3 (EC 3.6.1.-) [Source:UniProtKB/Swiss-Prot;Acc:Q6NZP1]		2756	TRUE
Tir3a-F12	NES16469088	1	129856673	T/G	TT	GG	GG	GG	ENSMUSG00000036086	ENSMUST00000112539	Zranb3-203	3PRIME_UTR	<0.1			Zinc finger Ran-binding domain-containing protein 3 (EC 3.6.1.-) [Source:UniProtKB/Swiss-Prot;Acc:Q6NZP1]		NULL	TRUE
Tir3a-F12	NES16467163	1	130417935	T/C	TT	CC	CC	CC	ENSMUSG00000080357	ENSMUST00000116707	AC161170.7-201	WITHIN_NON_CODING_GENE	0.974			No description		NULL	TRUE
Tir3a-F12	NES12869263	1	132013148	C/T	CC				ENSMUSG00000042581	ENSMUST00000073527	Thsd7b-202	NON_SYNONYMOUS_CODING	0.878	probably damaging	2.051	Thrombospondin type-1 domain-containing protein 7B Precursor [Source:UniProtKB/Swiss-Prot;Acc:Q6P4U0]		1096	TRUE
Tir3a-F12	NES12869264	1	132013252	A/G	AA				ENSMUSG00000042581	ENSMUST00000073527	Thsd7b-202	NON_SYNONYMOUS_CODING	1	benign	0.755	Thrombospondin type-1 domain-containing protein 7B Precursor [Source:UniProtKB/Swiss-Prot;Acc:Q6P4U0]		1131	TRUE
Tir3a-F12	NES12865437	1	132085101	T/C	TT				ENSMUSG00000042581	ENSMUST00000073527	Thsd7b-202	NON_SYNONYMOUS_CODING	<0.1	benign	1.256	Thrombospondin type-1 domain-containing protein 7B Precursor [Source:UniProtKB/Swiss-Prot;Acc:Q6P4U0]		1338	TRUE
Tir3a-F12	NES12865272	1	132086602	T/C	TT				ENSMUSG00000042581	ENSMUST00000073527	Thsd7b-202	SYNONYMOUS_CODING	0.963			Thrombospondin type-1 domain-containing protein 7B Precursor [Source:UniProtKB/Swiss-Prot;Acc:Q6P4U0]		NULL	TRUE
Tir3a-F12	NES12990936	1	132319470	C/A	CC				ENSMUSG00000026401	ENSMUST00000027654	Daf2-201	SPLICE_SITE	<0.1	benign	0	Complement decay-accelerating factor transmembrane isoform Precursor (DAF-TM)(CD55 antigen) [Source:UniProtKB/Swiss-Prot;Acc:Q61476]		NULL	TRUE
Tir3a-F12	NES12990936	1	132319470	C/A	CC				ENSMUSG00000026401	ENSMUST00000027654	Daf2-201	NON_SYNONYMOUS_CODING	<0.1	benign	0	Complement decay-accelerating factor transmembrane isoform Precursor (DAF-TM)(CD55 antigen) [Source:UniProtKB/Swiss-Prot;Acc:Q61476]		88	TRUE
Tir3a-F12	NES12990936	1	132319470	C/A	CC				ENSMUSG00000026401	ENSMUST00000112488	Daf2-001	SYNONYMOUS_CODING	<0.1			Complement decay-accelerating factor transmembrane isoform Precursor (DAF-TM)(CD55 antigen) [Source:UniProtKB/Swiss-Prot;Acc:Q61476]		NULL	TRUE
Tir3a-F12	NES12990936	1	132319470	C/A	CC				ENSMUSG00000026401	ENSMUST00000119432	Daf2-003	SYNONYMOUS_CODING	<0.1			Complement decay-accelerating factor transmembrane isoform Precursor (DAF-TM)(CD55 antigen) [Source:UniProtKB/Swiss-Prot;Acc:Q61476]		NULL	TRUE
Tir3a-F12	NES12990937	1	132319571	C/T	CC				ENSMUSG00000026401	ENSMUST00000027654	Daf2-201	UPSTREAM	<0.1			Complement decay-accelerating factor transmembrane isoform Precursor (DAF-TM)(CD55 antigen) [Source:UniProtKB/Swiss-Prot;Acc:Q61476]		NULL	TRUE
Tir3a-F12	NES12990937	1	132319571	C/T	CC				ENSMUSG00000026401	ENSMUST00000112488	Daf2-001	5PRIME_UTR	<0.1			Complement decay-accelerating factor transmembrane isoform Precursor (DAF-TM)(CD55 antigen) [Source:UniProtKB/Swiss-Prot;Acc:Q61476]		NULL	TRUE
Tir3a-F12	NES12990937	1	132319571	C/T	CC				ENSMUSG00000026401	ENSMUST00000119432	Daf2-003	5PRIME_UTR	<0.1			Complement decay-accelerating factor transmembrane isoform Precursor (DAF-TM)(CD55 antigen) [Source:UniProtKB/Swiss-Prot;Acc:Q61476]		NULL	TRUE
Tir3a-F12	NES12990978	1	132316229	A/C	AA	CC	CC	CC	ENSMUSG00000026401	ENSMUST00000027654	Daf2-201	NON_SYNONYMOUS_CODING	<0.1	benign	0.323	Complement decay-accelerating factor transmembrane isoform Precursor (DAF-TM)(CD55 antigen) [Source:UniProtKB/Swiss-Prot;Acc:Q61476]		442	TRUE
Tir3a-F12	NES12990978	1	132316229	A/C	AA	CC	CC	CC	ENSMUSG00000026401	ENSMUST00000112488	Daf2-001	NON_SYNONYMOUS_CODING	<0.1			Complement decay-accelerating factor transmembrane isoform Precursor (DAF-TM)(CD55 antigen) [Source:UniProtKB/Swiss-Prot;Acc:Q61476]		462	TRUE
Tir3a-F12	NES12990978	1	132316229	A/C	AA	CC	CC	CC	ENSMUSG00000026401	ENSMUST00000119432	Daf2-003	NON_SYNONYMOUS_CODING	<0.1			Complement decay-accelerating factor transmembrane isoform Precursor (DAF-TM)(CD55 antigen) [Source:UniProtKB/Swiss-Prot;Acc:Q61476]		472	TRUE
Tir3a-F12	NES12990979	1	132316244	A/G	AA	GG	GG	GG	ENSMUSG00000026401	ENSMUST00000027654	Daf2-201	NON_SYNONYMOUS_CODING	<0.1	benign	0.409	Complement decay-accelerating factor transmembrane isoform Precursor (DAF-TM)(CD55 antigen) [Source:UniProtKB/Swiss-Prot;Acc:Q61476]		427	TRUE
Tir3a-F12	NES12990979	1	132316244	A/G	AA	GG	GG	GG	ENSMUSG00000026401	ENSMUST00000112488	Daf2-001	NON_SYNONYMOUS_CODING	<0.1			Complement decay-accelerating factor transmembrane isoform Precursor (DAF-TM)(CD55 antigen) [Source:UniProtKB/Swiss-Prot;Acc:Q61476]		447	TRUE
Tir3a-F12	NES12990979	1	132316244	A/G	AA	GG	GG	GG	ENSMUSG00000026401	ENSMUST00000119432	Daf2-003	NON_SYNONYMOUS_CODING	<0.1			Complement decay-accelerating factor transmembrane isoform Precursor (DAF-TM)(CD55 antigen) [Source:UniProtKB/Swiss-Prot;Acc:Q61476]		457	TRUE
Tir3a-F12	NES12990980	1	132316358	T/C	TT	CC	CC	CC	ENSMUSG00000026401	ENSMUST00000027654	Daf2-201	NON_SYNONYMOUS_CODING	<0.1	benign	1.211	Complement decay-accelerating factor transmembrane isoform Precursor (DAF-TM)(CD55 antigen) [Source:UniProtKB/Swiss-Prot;Acc:Q61476]		313	TRUE
Tir3a-F12	NES12990980	1	132316358	T/C	TT	CC	CC	CC	ENSMUSG00000026401	ENSMUST00000112488	Daf2-001	NON_SYNONYMOUS_CODING	<0.1			Complement decay-accelerating factor transmembrane isoform Precursor (DAF-TM)(CD55 antigen) [Source:UniProtKB/Swiss-Prot;Acc:Q61476]		333	TRUE
Tir3a-F12	NES12990980	1	132316358	T/C	TT	CC	CC	CC	ENSMUSG00000026401	ENSMUST00000119432	Daf2-003	NON_SYNONYMOUS_CODING	<0.1			Complement decay-accelerating factor transmembrane isoform Precursor (DAF-TM)(CD55 antigen) [Source:UniProtKB/Swiss-Prot;Acc:Q61476]		343	TRUE
Tir3a-F12	NES12991053	1	132313432	T/C	TT	CC	CC	CC	ENSMUSG00000026401	ENSMUST00000027654	Daf2-201	SYNONYMOUS_CODING	<0.1			Complement decay-accelerating factor transmembrane isoform Precursor (DAF-TM)(CD55 antigen) [Source:UniProtKB/Swiss-Prot;Acc:Q61476]		NULL	TRUE
Tir3a-F12	NES12991053	1	132313432	T/C	TT	CC	CC	CC	ENSMUSG00000026401	ENSMUST00000112488	Daf2-001	SYNONYMOUS_CODING	<0.1			Complement decay-accelerating factor transmembrane isoform Precursor (DAF-TM)(CD55 antigen) [Source:UniProtKB/Swiss-Prot;Acc:Q61476]		NULL	TRUE
Tir3a-F12	NES12991053	1	132313432	T/C	TT	CC	CC	CC	ENSMUSG00000026401	ENSMUST00000119432	Daf2-003	SYNONYMOUS_CODING	<0.1			Complement decay-accelerating factor transmembrane isoform Precursor (DAF-TM)(CD55 antigen) [Source:UniProtKB/Swiss-Prot;Acc:Q61476]		NULL	TRUE
Tir3a-F12	NES12991055	1	132313438	A/G	AA	GG		GG	ENSMUSG00000026401	ENSMUST00000027654	Daf2-201	SYNONYMOUS_CODING	<0.1			Complement decay-accelerating factor transmembrane isoform Precursor (DAF-TM)(CD55 antigen) [Source:UniProtKB/Swiss-Prot;Acc:Q61476]		NULL	TRUE
Tir3a-F12	NES12991055	1	132313438	A/G	AA	GG		GG	ENSMUSG00000026401	ENSMUST00000112488	Daf2-001	SYNONYMOUS_CODING	<0.1			Complement decay-accelerating factor transmembrane isoform Precursor (DAF-TM)(CD55 antigen) [Source:UniProtKB/Swiss-Prot;Acc:Q61476]		NULL	TRUE
Tir3a-F12	NES12991055	1	132313438	A/G	AA	GG		GG	ENSMUSG00000026401	ENSMUST00000119432	Daf2-003	SYNONYMOUS_CODING	<0.1			Complement decay-accelerating factor transmembrane isoform Precursor (DAF-TM)(CD55 antigen) [Source:UniProtKB/Swiss-Prot;Acc:Q61476]		NULL	TRUE
Tir3a-F12	NES12990936	1	132319470	C/A	CC				ENSMUSG00000026401	ENSMUST00000027654	Daf2-201	SPLICE_SITE	<0.1	benign	0	Complement decay-accelerating factor transmembrane isoform Precursor (DAF-TM)(CD55 antigen) [Source:UniProtKB/Swiss-Prot;Acc:Q61476]		NULL	TRUE
Tir3a-F12	NES12990936	1	132319470	C/A	CC				ENSMUSG00000026401	ENSMUST00000027654	Daf2-201	NON_SYNONYMOUS_CODING	<0.1	benign	0	Complement decay-accelerating factor transmembrane isoform Precursor (DAF-TM)(CD55 antigen) [Source:UniProtKB/Swiss-Prot;Acc:Q61476]		88	TRUE
Tir3a-F12	NES12990936	1	132319470	C/A	CC				ENSMUSG00000026401	ENSMUST00000112488	Daf2-001	SYNONYMOUS_CODING	<0.1			Complement decay-accelerating factor transmembrane isoform Precursor (DAF-TM)(CD55 antigen) [Source:UniProtKB/Swiss-Prot;Acc:Q61476]		NULL	TRUE
Tir3a-F12	NES12990936	1	132319470	C/A	CC				ENSMUSG00000026401	ENSMUST00000119432	Daf2-003	SYNONYMOUS_CODING	<0.1			Complement decay-accelerating factor transmembrane isoform Precursor (DAF-TM)(CD55 antigen) [Source:UniProtKB/Swiss-Prot;Acc:Q61476]		NULL	TRUE
Tir3a-F12	NES12990937	1	132319571	C/T	CC				ENSMUSG00000026401	ENSMUST00000027654	Daf2-201	UPSTREAM	<0.1			Complement decay-accelerating factor transmembrane isoform Precursor (DAF-TM)(CD55 antigen) [Source:UniProtKB/Swiss-Prot;Acc:Q61476]		NULL	TRUE
Tir3a-F12	NES12990937	1	132319571	C/T	CC				ENSMUSG00000026401	ENSMUST00000112488	Daf2-001	5PRIME_UTR	<0.1			Complement decay-accelerating factor transmembrane isoform Precursor (DAF-TM)(CD55 antigen) [Source:UniProtKB/Swiss-Prot;Acc:Q61476]		NULL	TRUE
Tir3a-F12	NES12990937	1	132319571	C/T	CC				ENSMUSG00000026401	ENSMUST00000119432	Daf2-003	5PRIME_UTR	<0.1			Complement decay-accelerating factor transmembrane isoform Precursor (DAF-TM)(CD55 antigen) [Source:UniProtKB/Swiss-Prot;Acc:Q61476]		NULL	TRUE
Tir3a-F12	NES12990936	1	132319470	C/A	CC				ENSMUSG00000026401	ENSMUST00000027654	Daf2-201	SPLICE_SITE	<0.1	benign	0	Complement decay-accelerating factor transmembrane isoform Precursor (DAF-TM)(CD55 antigen) [Source:UniProtKB/Swiss-Prot;Acc:Q61476]		NULL	TRUE
Tir3a-F12	NES12990936	1	132319470	C/A	CC				ENSMUSG00000026401	ENSMUST00000027654	Daf2-201	NON_SYNONYMOUS_CODING	<0.1	benign	0	Complement decay-accelerating factor transmembrane isoform Precursor (DAF-TM)(CD55 antigen) [Source:UniProtKB/Swiss-Prot;Acc:Q61476]		88	TRUE
Tir3a-F12	NES12990936	1	132319470	C/A	CC				ENSMUSG00000026401	ENSMUST00000112488	Daf2-001	SYNONYMOUS_CODING	<0.1			Complement decay-accelerating factor transmembrane isoform Precursor (DAF-TM)(CD55 antigen) [Source:UniProtKB/Swiss-Prot;Acc:Q61476]		NULL	TRUE
Tir3a-F12	NES12990936	1	132319470	C/A	CC				ENSMUSG00000026401	ENSMUST00000119432	Daf2-003	SYNONYMOUS_CODING	<0.1			Complement decay-accelerating factor transmembrane isoform Precursor (DAF-TM)(CD55 antigen) [Source:UniProtKB/Swiss-Prot;Acc:Q61476]		NULL	TRUE
Tir3a-F12	NES12996963	1	132614280	A/G	AA				ENSMUSG00000026409	ENSMUST00000066863	Pfkfb2-201	UPSTREAM	1			6-phosphofructo-2-kinase/fructose-2,6-biphosphatase 2 (PFK-2/FBPase-2)(6PF-2-K/Fru-2,6-P2ASE heart-type isozyme) [Includes 6-phosphofructo-2-kinase(EC 2.7.1.105);Fructose-2,6-bisphosphatase(EC 3.1.3.46)] [Source:UniProtKB/Swiss-Prot;Acc:P70265]		NULL	TRUE
Tir3a-F12	NES12996965	1	132614318	T/C	TT				ENSMUSG00000026409	ENSMUST00000066863	Pfkfb2-201	UPSTREAM	0.693			6-phosphofructo-2-kinase/fructose-2,6-biphosphatase 2 (PFK-2/FBPase-2)(6PF-2-K/Fru-2,6-P2ASE heart-type isozyme) [Includes 6-phosphofructo-2-kinase(EC 2.7.1.105);Fructose-2,6-bisphosphatase(EC 3.1.3.46)] [Source:UniProtKB/Swiss-Prot;Acc:P70265]		NULL	TRUE
Tir3a-F12	NES12996965	1	132614318	T/C	TT				ENSMUSG00000046404	ENSMUST00000049813	Yod1-201	SYNONYMOUS_CODING	0.693			Ubiquitin thioesterase OTU1 (EC 3.1.2.-) [Source:UniProtKB/Swiss-Prot;Acc:Q8CB27]		NULL	TRUE
Tir3a-F12	NES16471829	1	132803723	T/G	TT				ENSMUSG00000026416	ENSMUST00000112468	Il20-202	3PRIME_UTR	<0.1			Interleukin-20 Precursor (IL-20)(Four alpha helix cytokine ZCYTO10) [Source:UniProtKB/Swiss-Prot;Acc:Q9JKV9]		NULL	TRUE
Tir3a-F12	NES16471829	1	132803723	T/G	TT				ENSMUSG00000026416	ENSMUST00000027673	Il20-201	3PRIME_UTR	<0.1			Interleukin-20 Precursor (IL-20)(Four alpha helix cytokine ZCYTO10) [Source:UniProtKB/Swiss-Prot;Acc:Q9JKV9]		NULL	TRUE
Tir3a-F12	NES12848474	1	133057071	G/T	GG				ENSMUSG00000026427	ENSMUST00000068805	Lgtn-006	SYNONYMOUS_CODING	0.319			Ligatin [Source:UniProtKB/Swiss-Prot;Acc:Q61211]		NULL	TRUE
Tir3a-F12	NES12848474	1	133057071	G/T	GG				ENSMUSG00000026427	ENSMUST00000068791	Lgtn-005	SYNONYMOUS_CODING	0.319			Ligatin [Source:UniProtKB/Swiss-Prot;Acc:Q61211]		NULL	TRUE
Tir3a-F12	NES12848474	1	133057071	G/T	GG				ENSMUSG00000026427	ENSMUST00000086578	Lgtn-201	SYNONYMOUS_CODING	0.319			Ligatin [Source:UniProtKB/Swiss-Prot;Acc:Q61211]		NULL	TRUE
Tir3a-F12	NES12848474	1	133057071	G/T	GG				ENSMUSG00000026427	ENSMUST00000112446	Lgtn-001	SYNONYMOUS_CODING	0.319			Ligatin [Source:UniProtKB/Swiss-Prot;Acc:Q61211]		NULL	TRUE
Tir3a-F12	NES12848477	1	133057094	C/G	CC	GG			ENSMUSG00000026427	ENSMUST00000068805	Lgtn-006	NON_SYNONYMOUS_CODING	<0.1	benign	0.255	Ligatin [Source:UniProtKB/Swiss-Prot;Acc:Q61211]		213	TRUE
Tir3a-F12	NES12848477	1	133057094	C/G	CC	GG			ENSMUSG00000026427	ENSMUST00000068791	Lgtn-005	NON_SYNONYMOUS_CODING	<0.1	benign	0.067	Ligatin [Source:UniProtKB/Swiss-Prot;Acc:Q61211]		213	TRUE
Tir3a-F12	NES12848477	1	133057094	C/G	CC	GG			ENSMUSG00000026427	ENSMUST00000086578	Lgtn-201	NON_SYNONYMOUS_CODING	<0.1	benign	0.064	Ligatin [Source:UniProtKB/Swiss-Prot;Acc:Q61211]		213	TRUE
Tir3a-F12	NES12848477	1	133057094	C/G	CC	GG			ENSMUSG00000026427	ENSMUST00000112446	Lgtn-001	NON_SYNONYMOUS_CODING	<0.1	benign	0.255	Ligatin [Source:UniProtKB/Swiss-Prot;Acc:Q61211]		213	TRUE
Tir3a-F12	NES12871299	1	133171847	G/T	GG	TT			ENSMUSG00000042349	ENSMUST00000062108	Ikbke-201	SYNONYMOUS_CODING	1			Inhibitor of nuclear factor kappa-B kinase subunit epsilon (I kappa-B kinase epsilon)(IkBKE)(IKK-epsilon)(IKK-E)(EC 2.7.11.10)(Inducible I kappa-B kinase)(IKK-i) [Source:UniProtKB/Swiss-Prot;Acc:Q9R0T8]		NULL	TRUE
Tir3a-F12	NES16471674	1	133182359	T/G	TT			TT	ENSMUSG00000026425	ENSMUST00000097588	Srgap2-203	3PRIME_UTR	0.525			SLIT-ROBO Rho GTPase-activating protein 2 (srGAP2)(Formin-binding protein 2)(Formin-binding protein 27)(FBP-27) [Source:UniProtKB/Swiss-Prot;Acc:Q91Z67]		NULL	FALSE
Tir3a-F12	NES16471674	1	133182359	T/G	TT			TT	ENSMUSG00000026425	ENSMUST00000032395	Srgap2-202	3PRIME_UTR	0.525			SLIT-ROBO Rho GTPase-activating protein 2 (srGAP2)(Formin-binding protein 2)(Formin-binding protein 27)(FBP-27) [Source:UniProtKB/Swiss-Prot;Acc:Q91Z67]		NULL	FALSE
Tir3a-F12	NES14472076	1	133609153	A/G	AA		GG	AA	ENSMUSG00000052688	ENSMUST00000064664	5430435G22Rik-201	3PRIME_UTR	<0.1			Ras-related protein Rab-7b [Source:UniProtKB/Swiss-Prot;Acc:Q8VEA8]		NULL	FALSE
Tir3a-F12	NES14472076	1	133609153	A/G	AA		GG	AA	ENSMUSG00000052688	ENSMUST00000064679	5430435G22Rik-202	3PRIME_UTR	<0.1			Ras-related protein Rab-7b [Source:UniProtKB/Swiss-Prot;Acc:Q8VEA8]		NULL	FALSE
Tir3a-F12	NES14477178	1	133950742	A/G	AA				ENSMUSG00000059149	ENSMUST00000112370	Mfsd4-204	SYNONYMOUS_CODING	0.255			Major facilitator superfamily domain-containing protein 4 [Source:UniProtKB/Swiss-Prot;Acc:Q6PDC8]		NULL	TRUE
Tir3a-F12	NES14477178	1	133950742	A/G	AA				ENSMUSG00000059149	ENSMUST00000086547	Mfsd4-202	INTRONIC	0.255			Major facilitator superfamily domain-containing protein 4 [Source:UniProtKB/Swiss-Prot;Acc:Q6PDC8]		NULL	TRUE
Tir3a-F12	NES14477178	1	133950742	A/G	AA				ENSMUSG00000059149	ENSMUST00000046658	Mfsd4-201	INTRONIC	0.255			Major facilitator superfamily domain-containing protein 4 [Source:UniProtKB/Swiss-Prot;Acc:Q6PDC8]		NULL	TRUE
Tir3a-F12	NES14477178	1	133950742	A/G	AA				ENSMUSG00000059149	ENSMUST00000112365	Mfsd4-203	SYNONYMOUS_CODING	0.255			Major facilitator superfamily domain-containing protein 4 [Source:UniProtKB/Swiss-Prot;Acc:Q6PDC8]		NULL	TRUE
Tir3a-F12	NES16476541	1	134212756	G/C	GG				ENSMUSG00000009772	ENSMUST00000082125	Nuak2-001	5PRIME_UTR	<0.1			NUAK family SNF1-like kinase 2 (EC 2.7.11.1) [Source:UniProtKB/Swiss-Prot;Acc:Q8BZN4]		NULL	TRUE
Tir3a-F12	NES16476541	1	134212756	G/C	GG				ENSMUSG00000009772	ENSMUST00000072177	Nuak2-002	5PRIME_UTR	<0.1			NUAK family SNF1-like kinase 2 (EC 2.7.11.1) [Source:UniProtKB/Swiss-Prot;Acc:Q8BZN4]		NULL	TRUE
Tir3a-F12	NES14474658	1	134346323	G/A	GG	AA	AA	AA	ENSMUSG00000042046	ENSMUST00000045110	Ripk5-201	SYNONYMOUS_CODING	1			Dual serine/threonine and tyrosine protein kinase (EC 2.7.12.1)(Dusty protein kinase)(Dusty PK)(Receptor-interacting serine/threonine-protein kinase 5) [Source:UniProtKB/Swiss-Prot;Acc:Q6XUX1]		NULL	TRUE
Tir3a-F12	NES14474580	1	134350682	A/G	AA	GG	GG	GG	ENSMUSG00000042046	ENSMUST00000045110	Ripk5-201	SYNONYMOUS_CODING	1			Dual serine/threonine and tyrosine protein kinase (EC 2.7.12.1)(Dusty protein kinase)(Dusty PK)(Receptor-interacting serine/threonine-protein kinase 5) [Source:UniProtKB/Swiss-Prot;Acc:Q6XUX1]		NULL	TRUE
Tir3a-F12	NES14474500	1	134361112	G/T	GG	TT	TT	TT	ENSMUSG00000042046	ENSMUST00000045110	Ripk5-201	3PRIME_UTR	<0.1			Dual serine/threonine and tyrosine protein kinase (EC 2.7.12.1)(Dusty protein kinase)(Dusty PK)(Receptor-interacting serine/threonine-protein kinase 5) [Source:UniProtKB/Swiss-Prot;Acc:Q6XUX1]		NULL	TRUE
Tir3a-F12	NES14474441	1	134363278	G/T	GG	TT	TT	TT	ENSMUSG00000042046	ENSMUST00000045110	Ripk5-201	3PRIME_UTR	1			Dual serine/threonine and tyrosine protein kinase (EC 2.7.12.1)(Dusty protein kinase)(Dusty PK)(Receptor-interacting serine/threonine-protein kinase 5) [Source:UniProtKB/Swiss-Prot;Acc:Q6XUX1]		NULL	TRUE
Tir3a-F12	NES14474054	1	134389213	A/G	AA	GG	GG	GG	ENSMUSG00000026439	ENSMUST00000027700	Rbbp5-201	SYNONYMOUS_CODING	0.997			retinoblastoma binding protein 5 [Source:RefSeq peptide;Acc:NP_766105]		NULL	TRUE
Tir3a-F12	NES14473962	1	134393541	A/G	AA	GG	GG	GG	ENSMUSG00000026439	ENSMUST00000027700	Rbbp5-201	SYNONYMOUS_CODING	1			retinoblastoma binding protein 5 [Source:RefSeq peptide;Acc:NP_766105]		NULL	TRUE
Tir3a-F12	NES14473875	1	134400691	A/G	AA	GG	GG	GG	ENSMUSG00000026439	ENSMUST00000027700	Rbbp5-201	3PRIME_UTR	<0.1			retinoblastoma binding protein 5 [Source:RefSeq peptide;Acc:NP_766105]		NULL	TRUE
Tir3a-F12	NES14473875	1	134400691	A/G	AA	GG	GG	GG	ENSMUSG00000048174	ENSMUST00000058167	Tmem81-201	UPSTREAM	<0.1			Transmembrane protein 81 Precursor [Source:UniProtKB/Swiss-Prot;Acc:Q9D5K1]		NULL	TRUE
Tir3a-F12	NES14473877	1	134400721	G/C	GG	CC	CC	CC	ENSMUSG00000026439	ENSMUST00000027700	Rbbp5-201	3PRIME_UTR	0.527			retinoblastoma binding protein 5 [Source:RefSeq peptide;Acc:NP_766105]		NULL	TRUE
Tir3a-F12	NES14473877	1	134400721	G/C	GG	CC	CC	CC	ENSMUSG00000048174	ENSMUST00000058167	Tmem81-201	UPSTREAM	0.527			Transmembrane protein 81 Precursor [Source:UniProtKB/Swiss-Prot;Acc:Q9D5K1]		NULL	TRUE
Tir3a-F12	NES14473775	1	134403793	G/A	GG	AA	AA	AA	ENSMUSG00000026439	ENSMUST00000027700	Rbbp5-201	DOWNSTREAM	<0.1			retinoblastoma binding protein 5 [Source:RefSeq peptide;Acc:NP_766105]		NULL	TRUE
Tir3a-F12	NES14473775	1	134403793	G/A	GG	AA	AA	AA	ENSMUSG00000048174	ENSMUST00000058167	Tmem81-201	5PRIME_UTR	<0.1			Transmembrane protein 81 Precursor [Source:UniProtKB/Swiss-Prot;Acc:Q9D5K1]		NULL	TRUE
Tir3a-F12	NES14473775	1	134403793	G/A	GG	AA	AA	AA	ENSMUSG00000053024	ENSMUST00000086521	Cntn2-201	DOWNSTREAM	<0.1			Contactin-2 Precursor (Axonin-1)(Axonal glycoprotein TAG-1)(Transient axonal glycoprotein 1)(TAX-1) [Source:UniProtKB/Swiss-Prot;Acc:Q61330]		NULL	TRUE
Tir3a-F12	NES14473691	1	134408092	C/A	CC	AA	AA	AA	ENSMUSG00000048174	ENSMUST00000058167	Tmem81-201	DOWNSTREAM	<0.1			Transmembrane protein 81 Precursor [Source:UniProtKB/Swiss-Prot;Acc:Q9D5K1]		NULL	TRUE
Tir3a-F12	NES14473691	1	134408092	C/A	CC	AA	AA	AA	ENSMUSG00000053024	ENSMUST00000086521	Cntn2-201	3PRIME_UTR	<0.1			Contactin-2 Precursor (Axonin-1)(Axonal glycoprotein TAG-1)(Transient axonal glycoprotein 1)(TAX-1) [Source:UniProtKB/Swiss-Prot;Acc:Q61330]		NULL	TRUE
Tir3a-F12	NES14473691	1	134408092	C/A	CC	AA	AA	AA	ENSMUSG00000053024	ENSMUST00000086522	Cntn2-202	DOWNSTREAM	<0.1			Contactin-2 Precursor (Axonin-1)(Axonal glycoprotein TAG-1)(Transient axonal glycoprotein 1)(TAX-1) [Source:UniProtKB/Swiss-Prot;Acc:Q61330]		NULL	TRUE
Tir3a-F12	NES14473694	1	134408145	G/C	GG	CC	CC	CC	ENSMUSG00000048174	ENSMUST00000058167	Tmem81-201	DOWNSTREAM	<0.1			Transmembrane protein 81 Precursor [Source:UniProtKB/Swiss-Prot;Acc:Q9D5K1]		NULL	TRUE
Tir3a-F12	NES14473694	1	134408145	G/C	GG	CC	CC	CC	ENSMUSG00000053024	ENSMUST00000086521	Cntn2-201	3PRIME_UTR	<0.1			Contactin-2 Precursor (Axonin-1)(Axonal glycoprotein TAG-1)(Transient axonal glycoprotein 1)(TAX-1) [Source:UniProtKB/Swiss-Prot;Acc:Q61330]		NULL	TRUE
Tir3a-F12	NES14473694	1	134408145	G/C	GG	CC	CC	CC	ENSMUSG00000053024	ENSMUST00000086522	Cntn2-202	DOWNSTREAM	<0.1			Contactin-2 Precursor (Axonin-1)(Axonal glycoprotein TAG-1)(Transient axonal glycoprotein 1)(TAX-1) [Source:UniProtKB/Swiss-Prot;Acc:Q61330]		NULL	TRUE
Tir3a-F12	NES14473663	1	134408972	G/A	GG	AA	AA	AA	ENSMUSG00000048174	ENSMUST00000058167	Tmem81-201	DOWNSTREAM	<0.1			Transmembrane protein 81 Precursor [Source:UniProtKB/Swiss-Prot;Acc:Q9D5K1]		NULL	TRUE
Tir3a-F12	NES14473663	1	134408972	G/A	GG	AA	AA	AA	ENSMUSG00000053024	ENSMUST00000086521	Cntn2-201	3PRIME_UTR	<0.1			Contactin-2 Precursor (Axonin-1)(Axonal glycoprotein TAG-1)(Transient axonal glycoprotein 1)(TAX-1) [Source:UniProtKB/Swiss-Prot;Acc:Q61330]		NULL	TRUE
Tir3a-F12	NES14473663	1	134408972	G/A	GG	AA	AA	AA	ENSMUSG00000053024	ENSMUST00000086522	Cntn2-202	DOWNSTREAM	<0.1			Contactin-2 Precursor (Axonin-1)(Axonal glycoprotein TAG-1)(Transient axonal glycoprotein 1)(TAX-1) [Source:UniProtKB/Swiss-Prot;Acc:Q61330]		NULL	TRUE
Tir3a-F12	NES14473666	1	134410090	A/G	AA	GG	GG	GG	ENSMUSG00000048174	ENSMUST00000058167	Tmem81-201	DOWNSTREAM	<0.1			Transmembrane protein 81 Precursor [Source:UniProtKB/Swiss-Prot;Acc:Q9D5K1]		NULL	TRUE
Tir3a-F12	NES14473666	1	134410090	A/G	AA	GG	GG	GG	ENSMUSG00000053024	ENSMUST00000086521	Cntn2-201	3PRIME_UTR	<0.1			Contactin-2 Precursor (Axonin-1)(Axonal glycoprotein TAG-1)(Transient axonal glycoprotein 1)(TAX-1) [Source:UniProtKB/Swiss-Prot;Acc:Q61330]		NULL	TRUE
Tir3a-F12	NES14473666	1	134410090	A/G	AA	GG	GG	GG	ENSMUSG00000053024	ENSMUST00000086522	Cntn2-202	DOWNSTREAM	<0.1			Contactin-2 Precursor (Axonin-1)(Axonal glycoprotein TAG-1)(Transient axonal glycoprotein 1)(TAX-1) [Source:UniProtKB/Swiss-Prot;Acc:Q61330]		NULL	TRUE
Tir3a-F12	NES14473624	1	134411810	C/T	CC	TT	TT	TT	ENSMUSG00000053024	ENSMUST00000086521	Cntn2-201	3PRIME_UTR	0.452			Contactin-2 Precursor (Axonin-1)(Axonal glycoprotein TAG-1)(Transient axonal glycoprotein 1)(TAX-1) [Source:UniProtKB/Swiss-Prot;Acc:Q61330]		NULL	TRUE
Tir3a-F12	NES14473624	1	134411810	C/T	CC	TT	TT	TT	ENSMUSG00000053024	ENSMUST00000086522	Cntn2-202	DOWNSTREAM	0.452			Contactin-2 Precursor (Axonin-1)(Axonal glycoprotein TAG-1)(Transient axonal glycoprotein 1)(TAX-1) [Source:UniProtKB/Swiss-Prot;Acc:Q61330]		NULL	TRUE
Tir3a-F12	NES12847850	1	134942829	C/T	CC			CC	ENSMUSG00000026447	ENSMUST00000077730	Pik3c2b-001	5PRIME_UTR	<0.1			Pik3c2b protein [Source:UniProtKB/TrEMBL;Acc:A2RSK1]		NULL	FALSE
Tir3a-F12	NES12847850	1	134942829	C/T	CC			CC	ENSMUSG00000026447	ENSMUST00000112310	Pik3c2b-202	5PRIME_UTR	<0.1			Pik3c2b protein [Source:UniProtKB/TrEMBL;Acc:A2RSK1]		NULL	FALSE
Tir3a-F12	NES12847850	1	134942829	C/T	CC			CC	ENSMUSG00000026447	ENSMUST00000077730	Pik3c2b-001	5PRIME_UTR	<0.1			Pik3c2b protein [Source:UniProtKB/TrEMBL;Acc:A2RSK1]		NULL	FALSE
Tir3a-F12	NES12847850	1	134942829	C/T	CC			CC	ENSMUSG00000026447	ENSMUST00000112310	Pik3c2b-202	5PRIME_UTR	<0.1			Pik3c2b protein [Source:UniProtKB/TrEMBL;Acc:A2RSK1]		NULL	FALSE
Tir3a-F12	NES12883599	1	134999986	C/T	CC				ENSMUSG00000026447	ENSMUST00000077730	Pik3c2b-001	SYNONYMOUS_CODING	0.473			Pik3c2b protein [Source:UniProtKB/TrEMBL;Acc:A2RSK1]		NULL	TRUE
Tir3a-F12	NES12883599	1	134999986	C/T	CC				ENSMUSG00000026447	ENSMUST00000112309	Pik3c2b-201	DOWNSTREAM	0.473			Pik3c2b protein [Source:UniProtKB/TrEMBL;Acc:A2RSK1]		NULL	TRUE
Tir3a-F12	NES12992132	1	136079118	C/T	CC				ENSMUSG00000064246	ENSMUST00000082060	Chi3l1-201	NON_SYNONYMOUS_CODING	<0.1	benign	0.045	Chitinase-3-like protein 1 Precursor (Cartilage glycoprotein 39)(CGP-39)(GP-39)(BRP39 protein) [Source:UniProtKB/Swiss-Prot;Acc:Q61362]		13	TRUE
Tir3a-F12	NES12992104	1	136080088	C/T	CC				ENSMUSG00000064246	ENSMUST00000082060	Chi3l1-201	SYNONYMOUS_CODING	0.976			Chitinase-3-like protein 1 Precursor (Cartilage glycoprotein 39)(CGP-39)(GP-39)(BRP39 protein) [Source:UniProtKB/Swiss-Prot;Acc:Q61362]		NULL	TRUE
Tir3a-F12	NES12992105	1	136080217	C/A	CC				ENSMUSG00000064246	ENSMUST00000082060	Chi3l1-201	NON_SYNONYMOUS_CODING	0.124	benign	0.334	Chitinase-3-like protein 1 Precursor (Cartilage glycoprotein 39)(CGP-39)(GP-39)(BRP39 protein) [Source:UniProtKB/Swiss-Prot;Acc:Q61362]		75	TRUE
Tir3b-F12	NES13066983	1	152240071	C/T	CC	TT		TT	ENSMUSG00000006010	ENSMUST00000111912	BC003331-202	5PRIME_UTR	0.915			Protein odr-4 homolog (mODR-4) [Source:UniProtKB/Swiss-Prot;Acc:Q4PJX1]		NULL	TRUE
Tir3b-F12	NES13066983	1	152240071	C/T	CC	TT		TT	ENSMUSG00000006010	ENSMUST00000097546	BC003331-201	5PRIME_UTR	0.915			Protein odr-4 homolog (mODR-4) [Source:UniProtKB/Swiss-Prot;Acc:Q4PJX1]		NULL	TRUE
Tir3b-F12	NES13066983	1	152240071	C/T	CC	TT		TT	ENSMUSG00000006010	ENSMUST00000097547	AC121113.1-003	5PRIME_UTR	0.915			Protein odr-4 homolog (mODR-4) [Source:UniProtKB/Swiss-Prot;Acc:Q4PJX1]		NULL	TRUE
Tir3b-F12	NES13066983	1	152240071	C/T	CC	TT		TT	ENSMUSG00000006010	ENSMUST00000111913	AC121113.1-001	5PRIME_UTR	0.915			Protein odr-4 homolog (mODR-4) [Source:UniProtKB/Swiss-Prot;Acc:Q4PJX1]		NULL	TRUE
Tir3b-F12	NES13066983	1	152240071	C/T	CC	TT		TT	ENSMUSG00000006010	ENSMUST00000006167	AC121113.1-002	UPSTREAM	0.915			Protein odr-4 homolog (mODR-4) [Source:UniProtKB/Swiss-Prot;Acc:Q4PJX1]		NULL	TRUE
Tir3b-F12	NES13066983	1	152240071	C/T	CC	TT		TT	ENSMUSG00000006010	ENSMUST00000094477	AC121113.1-004	UPSTREAM	0.915			Protein odr-4 homolog (mODR-4) [Source:UniProtKB/Swiss-Prot;Acc:Q4PJX1]		NULL	TRUE
Tir3b-F12	NES13066983	1	152240071	C/T	CC	TT		TT	ENSMUSG00000006005	ENSMUST00000064506	Tpr-201	5PRIME_UTR	0.915			nuclear pore complex-associated protein Tpr [Source:RefSeq peptide;Acc:NP_598541]		NULL	TRUE
Tir3b-F12	NES13066983	1	152240071	C/T	CC	TT		TT	ENSMUSG00000006005	ENSMUST00000119161	Tpr-001	UPSTREAM	0.915			nuclear pore complex-associated protein Tpr [Source:RefSeq peptide;Acc:NP_598541]		NULL	TRUE
Tir3b-F12	NES13066991	1	152240618	T/C	TT	CC		CC	ENSMUSG00000006010	ENSMUST00000111912	BC003331-202	UPSTREAM	<0.1			Protein odr-4 homolog (mODR-4) [Source:UniProtKB/Swiss-Prot;Acc:Q4PJX1]		NULL	TRUE
Tir3b-F12	NES13066991	1	152240618	T/C	TT	CC		CC	ENSMUSG00000006010	ENSMUST00000097546	BC003331-201	UPSTREAM	<0.1			Protein odr-4 homolog (mODR-4) [Source:UniProtKB/Swiss-Prot;Acc:Q4PJX1]		NULL	TRUE
Tir3b-F12	NES13066991	1	152240618	T/C	TT	CC		CC	ENSMUSG00000006010	ENSMUST00000097547	AC121113.1-003	UPSTREAM	<0.1			Protein odr-4 homolog (mODR-4) [Source:UniProtKB/Swiss-Prot;Acc:Q4PJX1]		NULL	TRUE
Tir3b-F12	NES13066991	1	152240618	T/C	TT	CC		CC	ENSMUSG00000006010	ENSMUST00000111913	AC121113.1-001	UPSTREAM	<0.1			Protein odr-4 homolog (mODR-4) [Source:UniProtKB/Swiss-Prot;Acc:Q4PJX1]		NULL	TRUE
Tir3b-F12	NES13066991	1	152240618	T/C	TT	CC		CC	ENSMUSG00000006010	ENSMUST00000006167	AC121113.1-002	UPSTREAM	<0.1			Protein odr-4 homolog (mODR-4) [Source:UniProtKB/Swiss-Prot;Acc:Q4PJX1]		NULL	TRUE
Tir3b-F12	NES13066991	1	152240618	T/C	TT	CC		CC	ENSMUSG00000006010	ENSMUST00000094477	AC121113.1-004	UPSTREAM	<0.1			Protein odr-4 homolog (mODR-4) [Source:UniProtKB/Swiss-Prot;Acc:Q4PJX1]		NULL	TRUE
Tir3b-F12	NES13066991	1	152240618	T/C	TT	CC		CC	ENSMUSG00000006005	ENSMUST00000064506	Tpr-201	5PRIME_UTR	<0.1			nuclear pore complex-associated protein Tpr [Source:RefSeq peptide;Acc:NP_598541]		NULL	TRUE
Tir3b-F12	NES13066991	1	152240618	T/C	TT	CC		CC	ENSMUSG00000006005	ENSMUST00000119161	Tpr-001	5PRIME_UTR	<0.1			nuclear pore complex-associated protein Tpr [Source:RefSeq peptide;Acc:NP_598541]		NULL	TRUE
Tir3b-F12	NES13066983	1	152240071	C/T	CC	TT		TT	ENSMUSG00000006010	ENSMUST00000111912	BC003331-202	5PRIME_UTR	0.915			Protein odr-4 homolog (mODR-4) [Source:UniProtKB/Swiss-Prot;Acc:Q4PJX1]		NULL	TRUE
Tir3b-F12	NES13066983	1	152240071	C/T	CC	TT		TT	ENSMUSG00000006010	ENSMUST00000097546	BC003331-201	5PRIME_UTR	0.915			Protein odr-4 homolog (mODR-4) [Source:UniProtKB/Swiss-Prot;Acc:Q4PJX1]		NULL	TRUE
Tir3b-F12	NES13066983	1	152240071	C/T	CC	TT		TT	ENSMUSG00000006010	ENSMUST00000097547	AC121113.1-003	5PRIME_UTR	0.915			Protein odr-4 homolog (mODR-4) [Source:UniProtKB/Swiss-Prot;Acc:Q4PJX1]		NULL	TRUE
Tir3b-F12	NES13066983	1	152240071	C/T	CC	TT		TT	ENSMUSG00000006010	ENSMUST00000111913	AC121113.1-001	5PRIME_UTR	0.915			Protein odr-4 homolog (mODR-4) [Source:UniProtKB/Swiss-Prot;Acc:Q4PJX1]		NULL	TRUE
Tir3b-F12	NES13066983	1	152240071	C/T	CC	TT		TT	ENSMUSG00000006010	ENSMUST00000006167	AC121113.1-002	UPSTREAM	0.915			Protein odr-4 homolog (mODR-4) [Source:UniProtKB/Swiss-Prot;Acc:Q4PJX1]		NULL	TRUE
Tir3b-F12	NES13066983	1	152240071	C/T	CC	TT		TT	ENSMUSG00000006010	ENSMUST00000094477	AC121113.1-004	UPSTREAM	0.915			Protein odr-4 homolog (mODR-4) [Source:UniProtKB/Swiss-Prot;Acc:Q4PJX1]		NULL	TRUE
Tir3b-F12	NES13066983	1	152240071	C/T	CC	TT		TT	ENSMUSG00000006005	ENSMUST00000064506	Tpr-201	5PRIME_UTR	0.915			nuclear pore complex-associated protein Tpr [Source:RefSeq peptide;Acc:NP_598541]		NULL	TRUE
Tir3b-F12	NES13066983	1	152240071	C/T	CC	TT		TT	ENSMUSG00000006005	ENSMUST00000119161	Tpr-001	UPSTREAM	0.915			nuclear pore complex-associated protein Tpr [Source:RefSeq peptide;Acc:NP_598541]		NULL	TRUE
Tir3b-F12	NES13066991	1	152240618	T/C	TT	CC		CC	ENSMUSG00000006010	ENSMUST00000111912	BC003331-202	UPSTREAM	<0.1			Protein odr-4 homolog (mODR-4) [Source:UniProtKB/Swiss-Prot;Acc:Q4PJX1]		NULL	TRUE
Tir3b-F12	NES13066991	1	152240618	T/C	TT	CC		CC	ENSMUSG00000006010	ENSMUST00000097546	BC003331-201	UPSTREAM	<0.1			Protein odr-4 homolog (mODR-4) [Source:UniProtKB/Swiss-Prot;Acc:Q4PJX1]		NULL	TRUE
Tir3b-F12	NES13066991	1	152240618	T/C	TT	CC		CC	ENSMUSG00000006010	ENSMUST00000097547	AC121113.1-003	UPSTREAM	<0.1			Protein odr-4 homolog (mODR-4) [Source:UniProtKB/Swiss-Prot;Acc:Q4PJX1]		NULL	TRUE
Tir3b-F12	NES13066991	1	152240618	T/C	TT	CC		CC	ENSMUSG00000006010	ENSMUST00000111913	AC121113.1-001	UPSTREAM	<0.1			Protein odr-4 homolog (mODR-4) [Source:UniProtKB/Swiss-Prot;Acc:Q4PJX1]		NULL	TRUE
Tir3b-F12	NES13066991	1	152240618	T/C	TT	CC		CC	ENSMUSG00000006010	ENSMUST00000006167	AC121113.1-002	UPSTREAM	<0.1			Protein odr-4 homolog (mODR-4) [Source:UniProtKB/Swiss-Prot;Acc:Q4PJX1]		NULL	TRUE
Tir3b-F12	NES13066991	1	152240618	T/C	TT	CC		CC	ENSMUSG00000006010	ENSMUST00000094477	AC121113.1-004	UPSTREAM	<0.1			Protein odr-4 homolog (mODR-4) [Source:UniProtKB/Swiss-Prot;Acc:Q4PJX1]		NULL	TRUE
Tir3b-F12	NES13066991	1	152240618	T/C	TT	CC		CC	ENSMUSG00000006005	ENSMUST00000064506	Tpr-201	5PRIME_UTR	<0.1			nuclear pore complex-associated protein Tpr [Source:RefSeq peptide;Acc:NP_598541]		NULL	TRUE
Tir3b-F12	NES13066991	1	152240618	T/C	TT	CC		CC	ENSMUSG00000006005	ENSMUST00000119161	Tpr-001	5PRIME_UTR	<0.1			nuclear pore complex-associated protein Tpr [Source:RefSeq peptide;Acc:NP_598541]		NULL	TRUE
Tir3b-F12	NES13072121	1	152840529	G/T	GG				ENSMUSG00000066842	ENSMUST00000074783	Hmcn1-001	5PRIME_UTR	<0.1			hemicentin 1 [Source:RefSeq peptide;Acc:NP_001019891]		NULL	TRUE
Tir3b-F12	NES13072121	1	152840529	G/T	GG				ENSMUSG00000066842	ENSMUST00000097545	Hmcn1-202	5PRIME_UTR	<0.1			hemicentin 1 [Source:RefSeq peptide;Acc:NP_001019891]		NULL	TRUE
Tir3b-F12	NES13074768	1	152721212	G/A	GG				ENSMUSG00000066842	ENSMUST00000074783	Hmcn1-001	INTRONIC	<0.1			hemicentin 1 [Source:RefSeq peptide;Acc:NP_001019891]		NULL	TRUE
Tir3b-F12	NES13074768	1	152721212	G/A	GG				ENSMUSG00000066842	ENSMUST00000097545	Hmcn1-202	3PRIME_UTR	<0.1			hemicentin 1 [Source:RefSeq peptide;Acc:NP_001019891]		NULL	TRUE
Tir3b-F12	NES13074769	1	152721809	G/T	GG				ENSMUSG00000066842	ENSMUST00000074783	Hmcn1-001	INTRONIC	<0.1			hemicentin 1 [Source:RefSeq peptide;Acc:NP_001019891]		NULL	TRUE
Tir3b-F12	NES13074769	1	152721809	G/T	GG				ENSMUSG00000066842	ENSMUST00000097545	Hmcn1-202	3PRIME_UTR	<0.1			hemicentin 1 [Source:RefSeq peptide;Acc:NP_001019891]		NULL	TRUE
Tir3b-F12	NES13074771	1	152722729	T/C	TT	CC			ENSMUSG00000066842	ENSMUST00000074783	Hmcn1-001	INTRONIC	<0.1			hemicentin 1 [Source:RefSeq peptide;Acc:NP_001019891]		NULL	TRUE
Tir3b-F12	NES13074771	1	152722729	T/C	TT	CC			ENSMUSG00000066842	ENSMUST00000097545	Hmcn1-202	3PRIME_UTR	<0.1			hemicentin 1 [Source:RefSeq peptide;Acc:NP_001019891]		NULL	TRUE
Tir3b-F12	NES13072121	1	152840529	G/T	GG				ENSMUSG00000066842	ENSMUST00000074783	Hmcn1-001	5PRIME_UTR	<0.1			hemicentin 1 [Source:RefSeq peptide;Acc:NP_001019891]		NULL	TRUE
Tir3b-F12	NES13072121	1	152840529	G/T	GG				ENSMUSG00000066842	ENSMUST00000097545	Hmcn1-202	5PRIME_UTR	<0.1			hemicentin 1 [Source:RefSeq peptide;Acc:NP_001019891]		NULL	TRUE
Tir3b-F12	NES13076383	1	152653635	G/T	GG	TT	TT	TT	ENSMUSG00000066842	ENSMUST00000074783	Hmcn1-001	SYNONYMOUS_CODING	1			hemicentin 1 [Source:RefSeq peptide;Acc:NP_001019891]		NULL	TRUE
Tir3b-F12	NES16490509	1	153226575	T/C	TT				ENSMUSG00000052748	ENSMUST00000111883	1200016B10Rik-203	3PRIME_UTR	1			Uncharacterized protein C1orf26 homolog [Source:UniProtKB/Swiss-Prot;Acc:Q9DBQ9]		NULL	TRUE
Tir3b-F12	NES16490509	1	153226575	T/C	TT				ENSMUSG00000052748	ENSMUST00000064771	1200016B10Rik-201	SYNONYMOUS_CODING	1			Uncharacterized protein C1orf26 homolog [Source:UniProtKB/Swiss-Prot;Acc:Q9DBQ9]		NULL	TRUE
Tir3b-F12	NES16490509	1	153226575	T/C	TT				ENSMUSG00000052748	ENSMUST00000086279	1200016B10Rik-202	SYNONYMOUS_CODING	1			Uncharacterized protein C1orf26 homolog [Source:UniProtKB/Swiss-Prot;Acc:Q9DBQ9]		NULL	TRUE
Tir3b-F12	NES16490509	1	153226575	T/C	TT				ENSMUSG00000052748	ENSMUST00000111883	1200016B10Rik-203	3PRIME_UTR	1			Uncharacterized protein C1orf26 homolog [Source:UniProtKB/Swiss-Prot;Acc:Q9DBQ9]		NULL	TRUE
Tir3b-F12	NES16490509	1	153226575	T/C	TT				ENSMUSG00000052748	ENSMUST00000064771	1200016B10Rik-201	SYNONYMOUS_CODING	1			Uncharacterized protein C1orf26 homolog [Source:UniProtKB/Swiss-Prot;Acc:Q9DBQ9]		NULL	TRUE
Tir3b-F12	NES16490509	1	153226575	T/C	TT				ENSMUSG00000052748	ENSMUST00000086279	1200016B10Rik-202	SYNONYMOUS_CODING	1			Uncharacterized protein C1orf26 homolog [Source:UniProtKB/Swiss-Prot;Acc:Q9DBQ9]		NULL	TRUE
Tir3b-F12	NES16489357	1	153304628	G/C	GG				ENSMUSG00000053286	ENSMUST00000065625	1190005F20Rik-201	NON_SYNONYMOUS_CODING	0.921	benign	1.077	TRM1-like protein [Source:UniProtKB/Swiss-Prot;Acc:A2RSY6]		615	TRUE
Tir3b-F12	NES16500329	1	153304998	G/A	GG				ENSMUSG00000053286	ENSMUST00000065625	1190005F20Rik-201	SYNONYMOUS_CODING	0.672			TRM1-like protein [Source:UniProtKB/Swiss-Prot;Acc:A2RSY6]		NULL	TRUE
Tir3b-F12	NES16500330	1	153305043	G/A	GG				ENSMUSG00000053286	ENSMUST00000065625	1190005F20Rik-201	SYNONYMOUS_CODING	0.884			TRM1-like protein [Source:UniProtKB/Swiss-Prot;Acc:A2RSY6]		NULL	TRUE
Tir3b-F12	NES16495133	1	153658809	C/G	CC		GG		ENSMUSG00000043019	ENSMUST00000059498	Edem3-201	SYNONYMOUS_CODING	1			ER degradation-enhancing alpha-mannosidase-like 3 Precursor [Source:UniProtKB/Swiss-Prot;Acc:Q2HXL6]		NULL	TRUE
Tir3b-F12	NES16434218	1	155392465	T/C	TT				ENSMUSG00000042684	ENSMUST00000041874	Npl-201	5PRIME_UTR	<0.1			N-acetylneuraminate lyase (NALase)(EC 4.1.3.3)(N-acetylneuraminic acid aldolase)(N-acetylneuraminate pyruvate-lyase)(Sialic acid lyase)(Sialate lyase)(Sialate-pyruvate lyase)(Sialic acid aldolase) [Source:UniProtKB/Swiss-Prot;Acc:Q9DCJ9]		NULL	TRUE
Tir3b-F12	NES16430912	1	155601715	T/A	TT				ENSMUSG00000066800	ENSMUST00000086209	Rnasel-201	NON_SYNONYMOUS_CODING	<0.1	benign	1.319	2-5A-dependent ribonuclease (2-5A-dependent RNase)(EC 3.1.26.-)(Ribonuclease L)(RNase L)(Ribonuclease 4) [Source:UniProtKB/Swiss-Prot;Acc:Q05921]		282	TRUE
Tir3b-F12	NES16430913	1	155601726	A/G	AA				ENSMUSG00000066800	ENSMUST00000086209	Rnasel-201	NON_SYNONYMOUS_CODING	<0.1	benign	1.242	2-5A-dependent ribonuclease (2-5A-dependent RNase)(EC 3.1.26.-)(Ribonuclease L)(RNase L)(Ribonuclease 4) [Source:UniProtKB/Swiss-Prot;Acc:Q05921]		286	TRUE
Tir3b-F12	NES16430914	1	155601760	T/C	TT				ENSMUSG00000066800	ENSMUST00000086209	Rnasel-201	SYNONYMOUS_CODING	0.124			2-5A-dependent ribonuclease (2-5A-dependent RNase)(EC 3.1.26.-)(Ribonuclease L)(RNase L)(Ribonuclease 4) [Source:UniProtKB/Swiss-Prot;Acc:Q05921]		NULL	TRUE
Tir3b-F12	NES16430915	1	155602049	C/T	CC				ENSMUSG00000066800	ENSMUST00000086209	Rnasel-201	NON_SYNONYMOUS_CODING	<0.1	benign	0.865	2-5A-dependent ribonuclease (2-5A-dependent RNase)(EC 3.1.26.-)(Ribonuclease L)(RNase L)(Ribonuclease 4) [Source:UniProtKB/Swiss-Prot;Acc:Q05921]		394	TRUE
Tir3b-F12	NES16430917	1	155602088	C/T	CC				ENSMUSG00000066800	ENSMUST00000086209	Rnasel-201	SYNONYMOUS_CODING	<0.1			2-5A-dependent ribonuclease (2-5A-dependent RNase)(EC 3.1.26.-)(Ribonuclease L)(RNase L)(Ribonuclease 4) [Source:UniProtKB/Swiss-Prot;Acc:Q05921]		NULL	TRUE
Tir3b-F12	NES16430918	1	155602100	G/A	GG				ENSMUSG00000066800	ENSMUST00000086209	Rnasel-201	NON_SYNONYMOUS_CODING	<0.1	benign	1.252	2-5A-dependent ribonuclease (2-5A-dependent RNase)(EC 3.1.26.-)(Ribonuclease L)(RNase L)(Ribonuclease 4) [Source:UniProtKB/Swiss-Prot;Acc:Q05921]		411	TRUE
Tir3b-F12	NES16430919	1	155602232	G/A	GG				ENSMUSG00000066800	ENSMUST00000086209	Rnasel-201	NON_SYNONYMOUS_CODING	<0.1	possibly damaging	1.501	2-5A-dependent ribonuclease (2-5A-dependent RNase)(EC 3.1.26.-)(Ribonuclease L)(RNase L)(Ribonuclease 4) [Source:UniProtKB/Swiss-Prot;Acc:Q05921]		455	TRUE
Tir3b-F12	NES16430774	1	155606790	A/C	AA				ENSMUSG00000066800	ENSMUST00000086209	Rnasel-201	NON_SYNONYMOUS_CODING	<0.1	benign	0.625	2-5A-dependent ribonuclease (2-5A-dependent RNase)(EC 3.1.26.-)(Ribonuclease L)(RNase L)(Ribonuclease 4) [Source:UniProtKB/Swiss-Prot;Acc:Q05921]		628	TRUE
Tir3b-F12	NES14465760	1	155722132	A/T	AA				ENSMUSG00000043282	ENSMUST00000055314	EG433365-201	NON_SYNONYMOUS_CODING	<0.1	probably damaging	3.083	hypothetical protein LOC433365 [Source:RefSeq peptide;Acc:NP_001008426]		186	TRUE
Tir3b-F12	NES12840909	1	156984660	C/T	CC				ENSMUSG00000026471	ENSMUST00000027744	Mr1-201	SYNONYMOUS_CODING	<0.1			Major histocompatibility complex class I-related gene protein Precursor (MHC class-I related-gene protein)(Class I histocompatibility antigen-like protein) [Source:UniProtKB/Swiss-Prot;Acc:Q8HWB0]		NULL	TRUE
Tir3b-F12	NES12835057	1	157079712	C/A	CC	AA			ENSMUSG00000033722	ENSMUST00000035914	BC034090-201	NON_SYNONYMOUS_CODING	0.983	possibly damaging	1.579	MKIAA1614 protein Fragment [Source:UniProtKB/TrEMBL;Acc:Q6ZPL5]		159	TRUE
Tir3b-F12	NES12777937	1	157534089	C/T	CC			CC	ENSMUSG00000033701	ENSMUST00000035560	Acbd6-201	SYNONYMOUS_CODING	1			Acyl-CoA-binding domain-containing protein 6 [Source:UniProtKB/Swiss-Prot;Acc:Q9D061]		NULL	FALSE
Tir3b-F12	NES12777356	1	157552365	C/T	CC	TT		TT	ENSMUSG00000026468	ENSMUST00000027740	Lhx4-201	SYNONYMOUS_CODING	0.999			LIM/homeobox protein Lhx4 (LIM homeobox protein 4) [Source:UniProtKB/Swiss-Prot;Acc:P53776]		NULL	TRUE
Tir3b-F12	NES12774139	1	157642503	G/A	GG	AA	AA	AA	ENSMUSG00000033684	ENSMUST00000035325	Qsox1-201	SYNONYMOUS_CODING	<0.1			Sulfhydryl oxidase 1 Precursor (mSOx)(EC 1.8.3.2)(Quiescin Q6)(Skin sulfhydryl oxidase) [Source:UniProtKB/Swiss-Prot;Acc:Q8BND5]		NULL	TRUE
Tir3b-F12	NES12774139	1	157642503	G/A	GG	AA	AA	AA	ENSMUSG00000033684	ENSMUST00000111764	Qsox1-202	SYNONYMOUS_CODING	<0.1			Sulfhydryl oxidase 1 Precursor (mSOx)(EC 1.8.3.2)(Quiescin Q6)(Skin sulfhydryl oxidase) [Source:UniProtKB/Swiss-Prot;Acc:Q8BND5]		NULL	TRUE
Tir3b-F12	NES12774294	1	157638194	A/G	AA	GG	GG	GG	ENSMUSG00000033684	ENSMUST00000035325	Qsox1-201	SYNONYMOUS_CODING	<0.1			Sulfhydryl oxidase 1 Precursor (mSOx)(EC 1.8.3.2)(Quiescin Q6)(Skin sulfhydryl oxidase) [Source:UniProtKB/Swiss-Prot;Acc:Q8BND5]		NULL	TRUE
Tir3b-F12	NES12774294	1	157638194	A/G	AA	GG	GG	GG	ENSMUSG00000033684	ENSMUST00000111764	Qsox1-202	SYNONYMOUS_CODING	<0.1			Sulfhydryl oxidase 1 Precursor (mSOx)(EC 1.8.3.2)(Quiescin Q6)(Skin sulfhydryl oxidase) [Source:UniProtKB/Swiss-Prot;Acc:Q8BND5]		NULL	TRUE
Tir3b-F12	NES12774258	1	157636505	G/A	GG	AA	AA	AA	ENSMUSG00000033684	ENSMUST00000035325	Qsox1-201	SYNONYMOUS_CODING	0.102			Sulfhydryl oxidase 1 Precursor (mSOx)(EC 1.8.3.2)(Quiescin Q6)(Skin sulfhydryl oxidase) [Source:UniProtKB/Swiss-Prot;Acc:Q8BND5]		NULL	TRUE
Tir3b-F12	NES12774258	1	157636505	G/A	GG	AA	AA	AA	ENSMUSG00000033684	ENSMUST00000111764	Qsox1-202	SYNONYMOUS_CODING	0.102			Sulfhydryl oxidase 1 Precursor (mSOx)(EC 1.8.3.2)(Quiescin Q6)(Skin sulfhydryl oxidase) [Source:UniProtKB/Swiss-Prot;Acc:Q8BND5]		NULL	TRUE
Tir3b-F12	NES12774705	1	157625594	C/G	CC	GG	GG	GG	ENSMUSG00000033684	ENSMUST00000035325	Qsox1-201	3PRIME_UTR	<0.1			Sulfhydryl oxidase 1 Precursor (mSOx)(EC 1.8.3.2)(Quiescin Q6)(Skin sulfhydryl oxidase) [Source:UniProtKB/Swiss-Prot;Acc:Q8BND5]		NULL	TRUE
Tir3b-F12	NES12774705	1	157625594	C/G	CC	GG	GG	GG	ENSMUSG00000033684	ENSMUST00000111764	Qsox1-202	3PRIME_UTR	<0.1			Sulfhydryl oxidase 1 Precursor (mSOx)(EC 1.8.3.2)(Quiescin Q6)(Skin sulfhydryl oxidase) [Source:UniProtKB/Swiss-Prot;Acc:Q8BND5]		NULL	TRUE
Tir3b-F12	NES12774708	1	157625604	T/C	TT	CC	CC	CC	ENSMUSG00000033684	ENSMUST00000035325	Qsox1-201	3PRIME_UTR	<0.1			Sulfhydryl oxidase 1 Precursor (mSOx)(EC 1.8.3.2)(Quiescin Q6)(Skin sulfhydryl oxidase) [Source:UniProtKB/Swiss-Prot;Acc:Q8BND5]		NULL	TRUE
Tir3b-F12	NES12774708	1	157625604	T/C	TT	CC	CC	CC	ENSMUSG00000033684	ENSMUST00000111764	Qsox1-202	3PRIME_UTR	<0.1			Sulfhydryl oxidase 1 Precursor (mSOx)(EC 1.8.3.2)(Quiescin Q6)(Skin sulfhydryl oxidase) [Source:UniProtKB/Swiss-Prot;Acc:Q8BND5]		NULL	TRUE
Tir3b-F12	NES12774713	1	157625694	T/C	TT	CC	CC	CC	ENSMUSG00000033684	ENSMUST00000035325	Qsox1-201	3PRIME_UTR	<0.1			Sulfhydryl oxidase 1 Precursor (mSOx)(EC 1.8.3.2)(Quiescin Q6)(Skin sulfhydryl oxidase) [Source:UniProtKB/Swiss-Prot;Acc:Q8BND5]		NULL	TRUE
Tir3b-F12	NES12774713	1	157625694	T/C	TT	CC	CC	CC	ENSMUSG00000033684	ENSMUST00000111764	Qsox1-202	3PRIME_UTR	<0.1			Sulfhydryl oxidase 1 Precursor (mSOx)(EC 1.8.3.2)(Quiescin Q6)(Skin sulfhydryl oxidase) [Source:UniProtKB/Swiss-Prot;Acc:Q8BND5]		NULL	TRUE
Tir3b-F12	NES12774715	1	157626081	G/A	GG	AA	AA	AA	ENSMUSG00000033684	ENSMUST00000035325	Qsox1-201	3PRIME_UTR	<0.1			Sulfhydryl oxidase 1 Precursor (mSOx)(EC 1.8.3.2)(Quiescin Q6)(Skin sulfhydryl oxidase) [Source:UniProtKB/Swiss-Prot;Acc:Q8BND5]		NULL	TRUE
Tir3b-F12	NES12774715	1	157626081	G/A	GG	AA	AA	AA	ENSMUSG00000033684	ENSMUST00000111764	Qsox1-202	INTRONIC	<0.1			Sulfhydryl oxidase 1 Precursor (mSOx)(EC 1.8.3.2)(Quiescin Q6)(Skin sulfhydryl oxidase) [Source:UniProtKB/Swiss-Prot;Acc:Q8BND5]		NULL	TRUE
Tir3b-F12	NES12774719	1	157626578	A/C	AA	CC	CC	CC	ENSMUSG00000033684	ENSMUST00000035325	Qsox1-201	NON_SYNONYMOUS_CODING	0.14	benign	0.212	Sulfhydryl oxidase 1 Precursor (mSOx)(EC 1.8.3.2)(Quiescin Q6)(Skin sulfhydryl oxidase) [Source:UniProtKB/Swiss-Prot;Acc:Q8BND5]		2068	TRUE
Tir3b-F12	NES12774719	1	157626578	A/C	AA	CC	CC	CC	ENSMUSG00000033684	ENSMUST00000111764	Qsox1-202	NON_SYNONYMOUS_CODING	0.14	benign	1.242	Sulfhydryl oxidase 1 Precursor (mSOx)(EC 1.8.3.2)(Quiescin Q6)(Skin sulfhydryl oxidase) [Source:UniProtKB/Swiss-Prot;Acc:Q8BND5]		2068	TRUE
Tir3b-F12	NES12774719	1	157626578	A/C	AA	CC	CC	CC	ENSMUSG00000033684	ENSMUST00000035325	Qsox1-201	NON_SYNONYMOUS_CODING	0.14	benign	0.212	Sulfhydryl oxidase 1 Precursor (mSOx)(EC 1.8.3.2)(Quiescin Q6)(Skin sulfhydryl oxidase) [Source:UniProtKB/Swiss-Prot;Acc:Q8BND5]		2068	TRUE
Tir3b-F12	NES12774719	1	157626578	A/C	AA	CC	CC	CC	ENSMUSG00000033684	ENSMUST00000111764	Qsox1-202	NON_SYNONYMOUS_CODING	0.14	benign	1.242	Sulfhydryl oxidase 1 Precursor (mSOx)(EC 1.8.3.2)(Quiescin Q6)(Skin sulfhydryl oxidase) [Source:UniProtKB/Swiss-Prot;Acc:Q8BND5]		2068	TRUE
Tir3b-F12	NES12774705	1	157625594	C/G	CC	GG	GG	GG	ENSMUSG00000033684	ENSMUST00000035325	Qsox1-201	3PRIME_UTR	<0.1			Sulfhydryl oxidase 1 Precursor (mSOx)(EC 1.8.3.2)(Quiescin Q6)(Skin sulfhydryl oxidase) [Source:UniProtKB/Swiss-Prot;Acc:Q8BND5]		NULL	TRUE
Tir3b-F12	NES12774705	1	157625594	C/G	CC	GG	GG	GG	ENSMUSG00000033684	ENSMUST00000111764	Qsox1-202	3PRIME_UTR	<0.1			Sulfhydryl oxidase 1 Precursor (mSOx)(EC 1.8.3.2)(Quiescin Q6)(Skin sulfhydryl oxidase) [Source:UniProtKB/Swiss-Prot;Acc:Q8BND5]		NULL	TRUE
Tir3b-F12	NES12774708	1	157625604	T/C	TT	CC	CC	CC	ENSMUSG00000033684	ENSMUST00000035325	Qsox1-201	3PRIME_UTR	<0.1			Sulfhydryl oxidase 1 Precursor (mSOx)(EC 1.8.3.2)(Quiescin Q6)(Skin sulfhydryl oxidase) [Source:UniProtKB/Swiss-Prot;Acc:Q8BND5]		NULL	TRUE
Tir3b-F12	NES12774708	1	157625604	T/C	TT	CC	CC	CC	ENSMUSG00000033684	ENSMUST00000111764	Qsox1-202	3PRIME_UTR	<0.1			Sulfhydryl oxidase 1 Precursor (mSOx)(EC 1.8.3.2)(Quiescin Q6)(Skin sulfhydryl oxidase) [Source:UniProtKB/Swiss-Prot;Acc:Q8BND5]		NULL	TRUE
Tir3b-F12	NES12774713	1	157625694	T/C	TT	CC	CC	CC	ENSMUSG00000033684	ENSMUST00000035325	Qsox1-201	3PRIME_UTR	<0.1			Sulfhydryl oxidase 1 Precursor (mSOx)(EC 1.8.3.2)(Quiescin Q6)(Skin sulfhydryl oxidase) [Source:UniProtKB/Swiss-Prot;Acc:Q8BND5]		NULL	TRUE
Tir3b-F12	NES12774713	1	157625694	T/C	TT	CC	CC	CC	ENSMUSG00000033684	ENSMUST00000111764	Qsox1-202	3PRIME_UTR	<0.1			Sulfhydryl oxidase 1 Precursor (mSOx)(EC 1.8.3.2)(Quiescin Q6)(Skin sulfhydryl oxidase) [Source:UniProtKB/Swiss-Prot;Acc:Q8BND5]		NULL	TRUE
Tir3b-F12	NES12796624	1	157769545	T/C	TT	CC	CC	CC	ENSMUSG00000033671	ENSMUST00000074902	Cep350-201	SYNONYMOUS_CODING	0.992			MKIAA0480 protein Fragment [Source:UniProtKB/TrEMBL;Acc:Q6A062]		NULL	TRUE
Tir3b-F12	NES12796804	1	157762586	T/C	TT	CC	CC	CC	ENSMUSG00000033671	ENSMUST00000074902	Cep350-201	SYNONYMOUS_CODING	<0.1			MKIAA0480 protein Fragment [Source:UniProtKB/TrEMBL;Acc:Q6A062]		NULL	TRUE
Tir3b-F12	NES12796795	1	157761885	G/A	GG	AA	AA	AA	ENSMUSG00000033671	ENSMUST00000074902	Cep350-201	SYNONYMOUS_CODING	0.807			MKIAA0480 protein Fragment [Source:UniProtKB/TrEMBL;Acc:Q6A062]		NULL	TRUE
Tir3b-F12	NES12796797	1	157761942	A/G	AA	GG	GG	GG	ENSMUSG00000033671	ENSMUST00000074902	Cep350-201	SYNONYMOUS_CODING	0.997			MKIAA0480 protein Fragment [Source:UniProtKB/TrEMBL;Acc:Q6A062]		NULL	TRUE
Tir3b-F12	NES12796976	1	157759084	T/C	TT	CC	CC	CC	ENSMUSG00000033671	ENSMUST00000074902	Cep350-201	SYNONYMOUS_CODING	0.889			MKIAA0480 protein Fragment [Source:UniProtKB/TrEMBL;Acc:Q6A062]		NULL	TRUE
Tir3b-F12	NES12797073	1	157757813	G/A	GG	AA	AA	AA	ENSMUSG00000033671	ENSMUST00000074902	Cep350-201	SYNONYMOUS_CODING	0.985			MKIAA0480 protein Fragment [Source:UniProtKB/TrEMBL;Acc:Q6A062]		NULL	TRUE
Tir3b-F12	NES12797320	1	157753638	C/T	CC	TT	TT	TT	ENSMUSG00000033671	ENSMUST00000074902	Cep350-201	SYNONYMOUS_CODING	0.892			MKIAA0480 protein Fragment [Source:UniProtKB/TrEMBL;Acc:Q6A062]		NULL	TRUE
Tir3b-F12	NES12797321	1	157753686	T/C	TT	CC	CC	CC	ENSMUSG00000033671	ENSMUST00000074902	Cep350-201	SYNONYMOUS_CODING	0.478			MKIAA0480 protein Fragment [Source:UniProtKB/TrEMBL;Acc:Q6A062]		NULL	TRUE
Tir3b-F12	NES12797493	1	157749837	T/C	TT	CC	CC	CC	ENSMUSG00000033671	ENSMUST00000074902	Cep350-201	SYNONYMOUS_CODING	0.997			MKIAA0480 protein Fragment [Source:UniProtKB/TrEMBL;Acc:Q6A062]		NULL	TRUE
Tir3b-F12	NES12799469	1	157708871	T/C	TT	CC		CC	ENSMUSG00000033671	ENSMUST00000074902	Cep350-201	SYNONYMOUS_CODING	<0.1			MKIAA0480 protein Fragment [Source:UniProtKB/TrEMBL;Acc:Q6A062]		NULL	TRUE
Tir3b-F12	NES12799471	1	157709499	G/A	GG	AA	AA	AA	ENSMUSG00000033671	ENSMUST00000074902	Cep350-201	NON_SYNONYMOUS_CODING	<0.1	possibly damaging	1.581	MKIAA0480 protein Fragment [Source:UniProtKB/TrEMBL;Acc:Q6A062]		4258	TRUE
Tir3b-F12	NES12799472	1	157710012	C/T	CC	TT	TT	TT	ENSMUSG00000033671	ENSMUST00000074902	Cep350-201	NON_SYNONYMOUS_CODING	<0.1	benign	1.09	MKIAA0480 protein Fragment [Source:UniProtKB/TrEMBL;Acc:Q6A062]		3745	TRUE
Tir3b-F12	NES12799473	1	157710050	T/C	TT	CC	CC	CC	ENSMUSG00000033671	ENSMUST00000074902	Cep350-201	SYNONYMOUS_CODING	<0.1			MKIAA0480 protein Fragment [Source:UniProtKB/TrEMBL;Acc:Q6A062]		NULL	TRUE
Tir3b-F12	NES12799475	1	157710356	T/C	TT	CC	CC	CC	ENSMUSG00000033671	ENSMUST00000074902	Cep350-201	SYNONYMOUS_CODING	0.997			MKIAA0480 protein Fragment [Source:UniProtKB/TrEMBL;Acc:Q6A062]		NULL	TRUE
Tir3b-F12	NES12799476	1	157710412	C/G	CC	GG	GG	GG	ENSMUSG00000033671	ENSMUST00000074902	Cep350-201	NON_SYNONYMOUS_CODING	<0.1	benign	0.785	MKIAA0480 protein Fragment [Source:UniProtKB/TrEMBL;Acc:Q6A062]		3345	TRUE
Tir3b-F12	NES12799477	1	157710524	A/G	AA	GG	GG	GG	ENSMUSG00000033671	ENSMUST00000074902	Cep350-201	SYNONYMOUS_CODING	0.19			MKIAA0480 protein Fragment [Source:UniProtKB/TrEMBL;Acc:Q6A062]		NULL	TRUE
Tir3b-F12	NES12799467	1	157707848	A/G	AA	GG	GG	GG	ENSMUSG00000033671	ENSMUST00000074902	Cep350-201	SYNONYMOUS_CODING	0.999			MKIAA0480 protein Fragment [Source:UniProtKB/TrEMBL;Acc:Q6A062]		NULL	TRUE
Tir3b-F12	NES12800091	1	157692470	G/T	GG	TT	TT	TT	ENSMUSG00000033671	ENSMUST00000074902	Cep350-201	3PRIME_UTR	1			MKIAA0480 protein Fragment [Source:UniProtKB/TrEMBL;Acc:Q6A062]		NULL	TRUE
Tir3b-F12	NES12800095	1	157693459	G/A	GG	AA	AA	AA	ENSMUSG00000033671	ENSMUST00000074902	Cep350-201	3PRIME_UTR	<0.1			MKIAA0480 protein Fragment [Source:UniProtKB/TrEMBL;Acc:Q6A062]		NULL	TRUE
Tir3b-F12	NES12800097	1	157693765	A/G	AA	GG	GG	GG	ENSMUSG00000033671	ENSMUST00000074902	Cep350-201	3PRIME_UTR	0.496			MKIAA0480 protein Fragment [Source:UniProtKB/TrEMBL;Acc:Q6A062]		NULL	TRUE
Tir3b-F12	NES12800098	1	157693818	A/G	AA	GG	GG	GG	ENSMUSG00000033671	ENSMUST00000074902	Cep350-201	3PRIME_UTR	0.996			MKIAA0480 protein Fragment [Source:UniProtKB/TrEMBL;Acc:Q6A062]		NULL	TRUE
Tir3b-F12	NES12795162	1	157805811	G/A	GG	AA	AA	AA	ENSMUSG00000058942	ENSMUST00000094446	Cep350-203	UPSTREAM	0.968			Putative uncharacterized protein Fragment [Source:UniProtKB/TrEMBL;Acc:Q8BXM7]		NULL	TRUE
Tir3b-F12	NES12795162	1	157805811	G/A	GG	AA	AA	AA	ENSMUSG00000077419	ENSMUST00000104231	U2	DOWNSTREAM	0.968			U2 spliceosomal RNA [Source:RFAM;Acc:RF00004]		NULL	TRUE
Tir3b-F12	NES15830793	1	157877553	A/T	AA	TT		TT	ENSMUSG00000026466	ENSMUST00000027738	Tor1aip1-001	NON_SYNONYMOUS_CODING	<0.1	probably damaging	2.232	Torsin-1A-interacting protein 1 (Lamina-associated polypeptide 1B) [Source:UniProtKB/Swiss-Prot;Acc:Q921T2]		806	TRUE
Tir3b-F12	NES15830793	1	157877553	A/T	AA	TT		TT	ENSMUSG00000026466	ENSMUST00000097528	Tor1aip1-202	NON_SYNONYMOUS_CODING	<0.1	possibly damaging	1.695	Torsin-1A-interacting protein 1 (Lamina-associated polypeptide 1B) [Source:UniProtKB/Swiss-Prot;Acc:Q921T2]		806	TRUE
Tir3b-F12	NES15830793	1	157877553	A/T	AA	TT		TT	ENSMUSG00000026466	ENSMUST00000097527	Tor1aip1-201	NON_SYNONYMOUS_CODING	<0.1	possibly damaging	1.814	Torsin-1A-interacting protein 1 (Lamina-associated polypeptide 1B) [Source:UniProtKB/Swiss-Prot;Acc:Q921T2]		806	TRUE
Tir3b-F12	NES15830793	1	157877553	A/T	AA	TT		TT	ENSMUSG00000050565	ENSMUST00000065673	Tor1aip2-002	UPSTREAM	<0.1			Torsin-1A-interacting protein 2 [Source:UniProtKB/Swiss-Prot;Acc:Q8BYU6]		NULL	TRUE
Tir3b-F12	NES15830795	1	157877560	A/G	AA		GG	GG	ENSMUSG00000026466	ENSMUST00000027738	Tor1aip1-001	SPLICE_SITE	0.901			Torsin-1A-interacting protein 1 (Lamina-associated polypeptide 1B) [Source:UniProtKB/Swiss-Prot;Acc:Q921T2]		NULL	TRUE
Tir3b-F12	NES15830795	1	157877560	A/G	AA		GG	GG	ENSMUSG00000026466	ENSMUST00000027738	Tor1aip1-001	SYNONYMOUS_CODING	0.901			Torsin-1A-interacting protein 1 (Lamina-associated polypeptide 1B) [Source:UniProtKB/Swiss-Prot;Acc:Q921T2]		NULL	TRUE
Tir3b-F12	NES15830795	1	157877560	A/G	AA		GG	GG	ENSMUSG00000026466	ENSMUST00000097528	Tor1aip1-202	SPLICE_SITE	0.901			Torsin-1A-interacting protein 1 (Lamina-associated polypeptide 1B) [Source:UniProtKB/Swiss-Prot;Acc:Q921T2]		NULL	TRUE
Tir3b-F12	NES15830795	1	157877560	A/G	AA		GG	GG	ENSMUSG00000026466	ENSMUST00000097528	Tor1aip1-202	SYNONYMOUS_CODING	0.901			Torsin-1A-interacting protein 1 (Lamina-associated polypeptide 1B) [Source:UniProtKB/Swiss-Prot;Acc:Q921T2]		NULL	TRUE
Tir3b-F12	NES15830795	1	157877560	A/G	AA		GG	GG	ENSMUSG00000026466	ENSMUST00000097527	Tor1aip1-201	SPLICE_SITE	0.901			Torsin-1A-interacting protein 1 (Lamina-associated polypeptide 1B) [Source:UniProtKB/Swiss-Prot;Acc:Q921T2]		NULL	TRUE
Tir3b-F12	NES15830795	1	157877560	A/G	AA		GG	GG	ENSMUSG00000026466	ENSMUST00000097527	Tor1aip1-201	SYNONYMOUS_CODING	0.901			Torsin-1A-interacting protein 1 (Lamina-associated polypeptide 1B) [Source:UniProtKB/Swiss-Prot;Acc:Q921T2]		NULL	TRUE
Tir3b-F12	NES15830795	1	157877560	A/G	AA		GG	GG	ENSMUSG00000050565	ENSMUST00000065673	Tor1aip2-002	UPSTREAM	0.901			Torsin-1A-interacting protein 2 [Source:UniProtKB/Swiss-Prot;Acc:Q8BYU6]		NULL	TRUE
Tir3b-F12	NES15830887	1	157870301	C/T	CC	TT		TT	ENSMUSG00000026466	ENSMUST00000027738	Tor1aip1-001	SYNONYMOUS_CODING	0.988			Torsin-1A-interacting protein 1 (Lamina-associated polypeptide 1B) [Source:UniProtKB/Swiss-Prot;Acc:Q921T2]		NULL	TRUE
Tir3b-F12	NES15830887	1	157870301	C/T	CC	TT		TT	ENSMUSG00000026466	ENSMUST00000097528	Tor1aip1-202	SYNONYMOUS_CODING	0.988			Torsin-1A-interacting protein 1 (Lamina-associated polypeptide 1B) [Source:UniProtKB/Swiss-Prot;Acc:Q921T2]		NULL	TRUE
Tir3b-F12	NES15830887	1	157870301	C/T	CC	TT		TT	ENSMUSG00000026466	ENSMUST00000097527	Tor1aip1-201	SYNONYMOUS_CODING	0.988			Torsin-1A-interacting protein 1 (Lamina-associated polypeptide 1B) [Source:UniProtKB/Swiss-Prot;Acc:Q921T2]		NULL	TRUE
Tir3b-F12	NES15830880	1	157869448	C/T	CC	TT	TT	TT	ENSMUSG00000026466	ENSMUST00000027738	Tor1aip1-001	NON_SYNONYMOUS_CODING	0.964	benign	0.093	Torsin-1A-interacting protein 1 (Lamina-associated polypeptide 1B) [Source:UniProtKB/Swiss-Prot;Acc:Q921T2]		944	TRUE
Tir3b-F12	NES15830880	1	157869448	C/T	CC	TT	TT	TT	ENSMUSG00000026466	ENSMUST00000097528	Tor1aip1-202	NON_SYNONYMOUS_CODING	0.964	benign	0.203	Torsin-1A-interacting protein 1 (Lamina-associated polypeptide 1B) [Source:UniProtKB/Swiss-Prot;Acc:Q921T2]		944	TRUE
Tir3b-F12	NES15830880	1	157869448	C/T	CC	TT	TT	TT	ENSMUSG00000026466	ENSMUST00000097527	Tor1aip1-201	NON_SYNONYMOUS_CODING	0.964	benign	0.095	Torsin-1A-interacting protein 1 (Lamina-associated polypeptide 1B) [Source:UniProtKB/Swiss-Prot;Acc:Q921T2]		944	TRUE
Tir3b-F12	NES15830727	1	157888067	T/A	TT	AA	AA	AA	ENSMUSG00000026466	ENSMUST00000027738	Tor1aip1-001	UPSTREAM	<0.1			Torsin-1A-interacting protein 1 (Lamina-associated polypeptide 1B) [Source:UniProtKB/Swiss-Prot;Acc:Q921T2]		NULL	TRUE
Tir3b-F12	NES15830727	1	157888067	T/A	TT	AA	AA	AA	ENSMUSG00000026466	ENSMUST00000097528	Tor1aip1-202	UPSTREAM	<0.1			Torsin-1A-interacting protein 1 (Lamina-associated polypeptide 1B) [Source:UniProtKB/Swiss-Prot;Acc:Q921T2]		NULL	TRUE
Tir3b-F12	NES15830727	1	157888067	T/A	TT	AA	AA	AA	ENSMUSG00000026466	ENSMUST00000097527	Tor1aip1-201	UPSTREAM	<0.1			Torsin-1A-interacting protein 1 (Lamina-associated polypeptide 1B) [Source:UniProtKB/Swiss-Prot;Acc:Q921T2]		NULL	TRUE
Tir3b-F12	NES15830727	1	157888067	T/A	TT	AA	AA	AA	ENSMUSG00000050565	ENSMUST00000065673	Tor1aip2-002	INTRONIC	<0.1			Torsin-1A-interacting protein 2 [Source:UniProtKB/Swiss-Prot;Acc:Q8BYU6]		NULL	TRUE
Tir3b-F12	NES15830727	1	157888067	T/A	TT	AA	AA	AA	ENSMUSG00000079252	ENSMUST00000111754	Ifrg15-004	INTRONIC	<0.1			interferon alpha responsive [Source:RefSeq peptide;Acc:NP_071724]		NULL	TRUE
Tir3b-F12	NES15830727	1	157888067	T/A	TT	AA	AA	AA	ENSMUSG00000050565	ENSMUST00000060404	Tor1aip2-001	5PRIME_UTR	<0.1			Torsin-1A-interacting protein 2 [Source:UniProtKB/Swiss-Prot;Acc:Q8BYU6]		NULL	TRUE
Tir3b-F12	NES15830727	1	157888067	T/A	TT	AA	AA	AA	ENSMUSG00000079252	ENSMUST00000065648	Ifrg15-001	5PRIME_UTR	<0.1			interferon alpha responsive [Source:RefSeq peptide;Acc:NP_071724]		NULL	TRUE
Tir3b-F12	NES15830727	1	157888067	T/A	TT	AA	AA	AA	ENSMUSG00000079252	ENSMUST00000097526	Ifrg15-002	5PRIME_UTR	<0.1			interferon alpha responsive [Source:RefSeq peptide;Acc:NP_071724]		NULL	TRUE
Tir3b-F12	NES15830393	1	157908728	T/C	TT	CC	CC	CC	ENSMUSG00000050565	ENSMUST00000065673	Tor1aip2-002	SYNONYMOUS_CODING	0.998			Torsin-1A-interacting protein 2 [Source:UniProtKB/Swiss-Prot;Acc:Q8BYU6]		NULL	TRUE
Tir3b-F12	NES15830393	1	157908728	T/C	TT	CC	CC	CC	ENSMUSG00000050565	ENSMUST00000060404	Tor1aip2-001	SYNONYMOUS_CODING	0.998			Torsin-1A-interacting protein 2 [Source:UniProtKB/Swiss-Prot;Acc:Q8BYU6]		NULL	TRUE
Tir3b-F12	NES15830393	1	157908728	T/C	TT	CC	CC	CC	ENSMUSG00000050565	ENSMUST00000111757	Tor1aip2-004	SYNONYMOUS_CODING	0.998			Torsin-1A-interacting protein 2 [Source:UniProtKB/Swiss-Prot;Acc:Q8BYU6]		NULL	TRUE
Tir3b-F12	NES15830394	1	157908785	G/A	GG	AA	AA	AA	ENSMUSG00000050565	ENSMUST00000065673	Tor1aip2-002	SYNONYMOUS_CODING	<0.1			Torsin-1A-interacting protein 2 [Source:UniProtKB/Swiss-Prot;Acc:Q8BYU6]		NULL	TRUE
Tir3b-F12	NES15830394	1	157908785	G/A	GG	AA	AA	AA	ENSMUSG00000050565	ENSMUST00000060404	Tor1aip2-001	SYNONYMOUS_CODING	<0.1			Torsin-1A-interacting protein 2 [Source:UniProtKB/Swiss-Prot;Acc:Q8BYU6]		NULL	TRUE
Tir3b-F12	NES15830394	1	157908785	G/A	GG	AA	AA	AA	ENSMUSG00000050565	ENSMUST00000111757	Tor1aip2-004	SYNONYMOUS_CODING	<0.1			Torsin-1A-interacting protein 2 [Source:UniProtKB/Swiss-Prot;Acc:Q8BYU6]		NULL	TRUE
Tir3b-F12	NES15830395	1	157908787	A/G	AA				ENSMUSG00000050565	ENSMUST00000065673	Tor1aip2-002	NON_SYNONYMOUS_CODING	<0.1	benign	1.154	Torsin-1A-interacting protein 2 [Source:UniProtKB/Swiss-Prot;Acc:Q8BYU6]		46	TRUE
Tir3b-F12	NES15830395	1	157908787	A/G	AA				ENSMUSG00000050565	ENSMUST00000060404	Tor1aip2-001	NON_SYNONYMOUS_CODING	<0.1	benign	1.154	Torsin-1A-interacting protein 2 [Source:UniProtKB/Swiss-Prot;Acc:Q8BYU6]		46	TRUE
Tir3b-F12	NES15830395	1	157908787	A/G	AA				ENSMUSG00000050565	ENSMUST00000111757	Tor1aip2-004	NON_SYNONYMOUS_CODING	<0.1	benign	1.154	Torsin-1A-interacting protein 2 [Source:UniProtKB/Swiss-Prot;Acc:Q8BYU6]		46	TRUE
Tir3b-F12	NES15830397	1	157908895	A/G	AA	GG	GG	GG	ENSMUSG00000050565	ENSMUST00000065673	Tor1aip2-002	NON_SYNONYMOUS_CODING	<0.1	possibly damaging	1.65	Torsin-1A-interacting protein 2 [Source:UniProtKB/Swiss-Prot;Acc:Q8BYU6]		82	TRUE
Tir3b-F12	NES15830397	1	157908895	A/G	AA	GG	GG	GG	ENSMUSG00000050565	ENSMUST00000060404	Tor1aip2-001	NON_SYNONYMOUS_CODING	<0.1	possibly damaging	1.65	Torsin-1A-interacting protein 2 [Source:UniProtKB/Swiss-Prot;Acc:Q8BYU6]		82	TRUE
Tir3b-F12	NES15830397	1	157908895	A/G	AA	GG	GG	GG	ENSMUSG00000050565	ENSMUST00000111757	Tor1aip2-004	NON_SYNONYMOUS_CODING	<0.1	possibly damaging	1.65	Torsin-1A-interacting protein 2 [Source:UniProtKB/Swiss-Prot;Acc:Q8BYU6]		82	TRUE
Tir3b-F12	NES15830398	1	157908914	G/A	GG	AA	AA	AA	ENSMUSG00000050565	ENSMUST00000065673	Tor1aip2-002	SYNONYMOUS_CODING	<0.1			Torsin-1A-interacting protein 2 [Source:UniProtKB/Swiss-Prot;Acc:Q8BYU6]		NULL	TRUE
Tir3b-F12	NES15830398	1	157908914	G/A	GG	AA	AA	AA	ENSMUSG00000050565	ENSMUST00000060404	Tor1aip2-001	SYNONYMOUS_CODING	<0.1			Torsin-1A-interacting protein 2 [Source:UniProtKB/Swiss-Prot;Acc:Q8BYU6]		NULL	TRUE
Tir3b-F12	NES15830398	1	157908914	G/A	GG	AA	AA	AA	ENSMUSG00000050565	ENSMUST00000111757	Tor1aip2-004	SYNONYMOUS_CODING	<0.1			Torsin-1A-interacting protein 2 [Source:UniProtKB/Swiss-Prot;Acc:Q8BYU6]		NULL	TRUE
Tir3b-F12	NES15830399	1	157909039	G/T	GG	TT	TT	TT	ENSMUSG00000050565	ENSMUST00000065673	Tor1aip2-002	NON_SYNONYMOUS_CODING	<0.1	possibly damaging	1.826	Torsin-1A-interacting protein 2 [Source:UniProtKB/Swiss-Prot;Acc:Q8BYU6]		130	TRUE
Tir3b-F12	NES15830399	1	157909039	G/T	GG	TT	TT	TT	ENSMUSG00000050565	ENSMUST00000060404	Tor1aip2-001	NON_SYNONYMOUS_CODING	<0.1	possibly damaging	1.826	Torsin-1A-interacting protein 2 [Source:UniProtKB/Swiss-Prot;Acc:Q8BYU6]		130	TRUE
Tir3b-F12	NES15830399	1	157909039	G/T	GG	TT	TT	TT	ENSMUSG00000050565	ENSMUST00000111757	Tor1aip2-004	NON_SYNONYMOUS_CODING	<0.1	possibly damaging	1.826	Torsin-1A-interacting protein 2 [Source:UniProtKB/Swiss-Prot;Acc:Q8BYU6]		130	TRUE
Tir3b-F12	NES15830401	1	157909093	T/C	TT	CC	CC	CC	ENSMUSG00000050565	ENSMUST00000065673	Tor1aip2-002	NON_SYNONYMOUS_CODING	<0.1	benign	0.222	Torsin-1A-interacting protein 2 [Source:UniProtKB/Swiss-Prot;Acc:Q8BYU6]		148	TRUE
Tir3b-F12	NES15830401	1	157909093	T/C	TT	CC	CC	CC	ENSMUSG00000050565	ENSMUST00000060404	Tor1aip2-001	NON_SYNONYMOUS_CODING	<0.1	benign	0.222	Torsin-1A-interacting protein 2 [Source:UniProtKB/Swiss-Prot;Acc:Q8BYU6]		148	TRUE
Tir3b-F12	NES15830401	1	157909093	T/C	TT	CC	CC	CC	ENSMUSG00000050565	ENSMUST00000111757	Tor1aip2-004	NON_SYNONYMOUS_CODING	<0.1	benign	0.222	Torsin-1A-interacting protein 2 [Source:UniProtKB/Swiss-Prot;Acc:Q8BYU6]		148	TRUE
Tir3b-F12	NES15830402	1	157909133	T/C	TT	CC		CC	ENSMUSG00000050565	ENSMUST00000065673	Tor1aip2-002	SYNONYMOUS_CODING	<0.1			Torsin-1A-interacting protein 2 [Source:UniProtKB/Swiss-Prot;Acc:Q8BYU6]		NULL	TRUE
Tir3b-F12	NES15830402	1	157909133	T/C	TT	CC		CC	ENSMUSG00000050565	ENSMUST00000060404	Tor1aip2-001	SYNONYMOUS_CODING	<0.1			Torsin-1A-interacting protein 2 [Source:UniProtKB/Swiss-Prot;Acc:Q8BYU6]		NULL	TRUE
Tir3b-F12	NES15830402	1	157909133	T/C	TT	CC		CC	ENSMUSG00000050565	ENSMUST00000111757	Tor1aip2-004	SYNONYMOUS_CODING	<0.1			Torsin-1A-interacting protein 2 [Source:UniProtKB/Swiss-Prot;Acc:Q8BYU6]		NULL	TRUE
Tir3b-F12	NES15830403	1	157909223	C/T	CC	TT	TT	TT	ENSMUSG00000050565	ENSMUST00000065673	Tor1aip2-002	SYNONYMOUS_CODING	0.105			Torsin-1A-interacting protein 2 [Source:UniProtKB/Swiss-Prot;Acc:Q8BYU6]		NULL	TRUE
Tir3b-F12	NES15830403	1	157909223	C/T	CC	TT	TT	TT	ENSMUSG00000050565	ENSMUST00000060404	Tor1aip2-001	SYNONYMOUS_CODING	0.105			Torsin-1A-interacting protein 2 [Source:UniProtKB/Swiss-Prot;Acc:Q8BYU6]		NULL	TRUE
Tir3b-F12	NES15830403	1	157909223	C/T	CC	TT	TT	TT	ENSMUSG00000050565	ENSMUST00000111757	Tor1aip2-004	SYNONYMOUS_CODING	0.105			Torsin-1A-interacting protein 2 [Source:UniProtKB/Swiss-Prot;Acc:Q8BYU6]		NULL	TRUE
Tir3b-F12	NES15830404	1	157909264	A/G	AA	GG	GG	GG	ENSMUSG00000050565	ENSMUST00000065673	Tor1aip2-002	NON_SYNONYMOUS_CODING	<0.1	benign	0.007	Torsin-1A-interacting protein 2 [Source:UniProtKB/Swiss-Prot;Acc:Q8BYU6]		205	TRUE
Tir3b-F12	NES15830404	1	157909264	A/G	AA	GG	GG	GG	ENSMUSG00000050565	ENSMUST00000060404	Tor1aip2-001	NON_SYNONYMOUS_CODING	<0.1	benign	0.007	Torsin-1A-interacting protein 2 [Source:UniProtKB/Swiss-Prot;Acc:Q8BYU6]		205	TRUE
Tir3b-F12	NES15830404	1	157909264	A/G	AA	GG	GG	GG	ENSMUSG00000050565	ENSMUST00000111757	Tor1aip2-004	NON_SYNONYMOUS_CODING	<0.1	benign	0.007	Torsin-1A-interacting protein 2 [Source:UniProtKB/Swiss-Prot;Acc:Q8BYU6]		205	TRUE
Tir3b-F12	NES15830339	1	157912175	G/A	GG	AA	AA	AA	ENSMUSG00000050565	ENSMUST00000065673	Tor1aip2-002	NON_SYNONYMOUS_CODING	<0.1	benign	1.152	Torsin-1A-interacting protein 2 [Source:UniProtKB/Swiss-Prot;Acc:Q8BYU6]		366	TRUE
Tir3b-F12	NES15830339	1	157912175	G/A	GG	AA	AA	AA	ENSMUSG00000050565	ENSMUST00000060404	Tor1aip2-001	NON_SYNONYMOUS_CODING	<0.1	benign	1.152	Torsin-1A-interacting protein 2 [Source:UniProtKB/Swiss-Prot;Acc:Q8BYU6]		366	TRUE
Tir3b-F12	NES15830339	1	157912175	G/A	GG	AA	AA	AA	ENSMUSG00000050565	ENSMUST00000111757	Tor1aip2-004	NON_SYNONYMOUS_CODING	<0.1	benign	1.152	Torsin-1A-interacting protein 2 [Source:UniProtKB/Swiss-Prot;Acc:Q8BYU6]		366	TRUE
Tir3b-F12	NES15830340	1	157912291	C/G	CC	GG	GG	GG	ENSMUSG00000050565	ENSMUST00000065673	Tor1aip2-002	SYNONYMOUS_CODING	0.907			Torsin-1A-interacting protein 2 [Source:UniProtKB/Swiss-Prot;Acc:Q8BYU6]		NULL	TRUE
Tir3b-F12	NES15830340	1	157912291	C/G	CC	GG	GG	GG	ENSMUSG00000050565	ENSMUST00000060404	Tor1aip2-001	SYNONYMOUS_CODING	0.907			Torsin-1A-interacting protein 2 [Source:UniProtKB/Swiss-Prot;Acc:Q8BYU6]		NULL	TRUE
Tir3b-F12	NES15830340	1	157912291	C/G	CC	GG	GG	GG	ENSMUSG00000050565	ENSMUST00000111757	Tor1aip2-004	SYNONYMOUS_CODING	0.907			Torsin-1A-interacting protein 2 [Source:UniProtKB/Swiss-Prot;Acc:Q8BYU6]		NULL	TRUE
Tir3b-F12	NES15830341	1	157912336	C/T	CC	TT	TT	TT	ENSMUSG00000050565	ENSMUST00000065673	Tor1aip2-002	SYNONYMOUS_CODING	0.995			Torsin-1A-interacting protein 2 [Source:UniProtKB/Swiss-Prot;Acc:Q8BYU6]		NULL	TRUE
Tir3b-F12	NES15830341	1	157912336	C/T	CC	TT	TT	TT	ENSMUSG00000050565	ENSMUST00000060404	Tor1aip2-001	SYNONYMOUS_CODING	0.995			Torsin-1A-interacting protein 2 [Source:UniProtKB/Swiss-Prot;Acc:Q8BYU6]		NULL	TRUE
Tir3b-F12	NES15830341	1	157912336	C/T	CC	TT	TT	TT	ENSMUSG00000050565	ENSMUST00000111757	Tor1aip2-004	SYNONYMOUS_CODING	0.995			Torsin-1A-interacting protein 2 [Source:UniProtKB/Swiss-Prot;Acc:Q8BYU6]		NULL	TRUE
Tir3b-F12	NES15830342	1	157912366	A/C	AA	CC	CC	CC	ENSMUSG00000050565	ENSMUST00000065673	Tor1aip2-002	SYNONYMOUS_CODING	<0.1			Torsin-1A-interacting protein 2 [Source:UniProtKB/Swiss-Prot;Acc:Q8BYU6]		NULL	TRUE
Tir3b-F12	NES15830342	1	157912366	A/C	AA	CC	CC	CC	ENSMUSG00000050565	ENSMUST00000060404	Tor1aip2-001	SYNONYMOUS_CODING	<0.1			Torsin-1A-interacting protein 2 [Source:UniProtKB/Swiss-Prot;Acc:Q8BYU6]		NULL	TRUE
Tir3b-F12	NES15830342	1	157912366	A/C	AA	CC	CC	CC	ENSMUSG00000050565	ENSMUST00000111757	Tor1aip2-004	SYNONYMOUS_CODING	<0.1			Torsin-1A-interacting protein 2 [Source:UniProtKB/Swiss-Prot;Acc:Q8BYU6]		NULL	TRUE
Tir3b-F12	NES15830343	1	157912483	C/T	CC			TT	ENSMUSG00000050565	ENSMUST00000065673	Tor1aip2-002	SYNONYMOUS_CODING	1			Torsin-1A-interacting protein 2 [Source:UniProtKB/Swiss-Prot;Acc:Q8BYU6]		NULL	TRUE
Tir3b-F12	NES15830343	1	157912483	C/T	CC			TT	ENSMUSG00000050565	ENSMUST00000060404	Tor1aip2-001	SYNONYMOUS_CODING	1			Torsin-1A-interacting protein 2 [Source:UniProtKB/Swiss-Prot;Acc:Q8BYU6]		NULL	TRUE
Tir3b-F12	NES15830343	1	157912483	C/T	CC			TT	ENSMUSG00000050565	ENSMUST00000111757	Tor1aip2-004	SYNONYMOUS_CODING	1			Torsin-1A-interacting protein 2 [Source:UniProtKB/Swiss-Prot;Acc:Q8BYU6]		NULL	TRUE
Tir3b-F12	NES15830344	1	157912639	G/A	GG	AA	AA	AA	ENSMUSG00000050565	ENSMUST00000065673	Tor1aip2-002	3PRIME_UTR	<0.1			Torsin-1A-interacting protein 2 [Source:UniProtKB/Swiss-Prot;Acc:Q8BYU6]		NULL	TRUE
Tir3b-F12	NES15830344	1	157912639	G/A	GG	AA	AA	AA	ENSMUSG00000050565	ENSMUST00000060404	Tor1aip2-001	3PRIME_UTR	<0.1			Torsin-1A-interacting protein 2 [Source:UniProtKB/Swiss-Prot;Acc:Q8BYU6]		NULL	TRUE
Tir3b-F12	NES15830344	1	157912639	G/A	GG	AA	AA	AA	ENSMUSG00000050565	ENSMUST00000111757	Tor1aip2-004	3PRIME_UTR	<0.1			Torsin-1A-interacting protein 2 [Source:UniProtKB/Swiss-Prot;Acc:Q8BYU6]		NULL	TRUE
Tir3b-F12	NES15830345	1	157912681	C/T	CC	TT	TT	TT	ENSMUSG00000050565	ENSMUST00000065673	Tor1aip2-002	3PRIME_UTR	<0.1			Torsin-1A-interacting protein 2 [Source:UniProtKB/Swiss-Prot;Acc:Q8BYU6]		NULL	TRUE
Tir3b-F12	NES15830345	1	157912681	C/T	CC	TT	TT	TT	ENSMUSG00000050565	ENSMUST00000060404	Tor1aip2-001	3PRIME_UTR	<0.1			Torsin-1A-interacting protein 2 [Source:UniProtKB/Swiss-Prot;Acc:Q8BYU6]		NULL	TRUE
Tir3b-F12	NES15830345	1	157912681	C/T	CC	TT	TT	TT	ENSMUSG00000050565	ENSMUST00000111757	Tor1aip2-004	3PRIME_UTR	<0.1			Torsin-1A-interacting protein 2 [Source:UniProtKB/Swiss-Prot;Acc:Q8BYU6]		NULL	TRUE
Tir3b-F12	NES15830346	1	157912711	C/T	CC				ENSMUSG00000050565	ENSMUST00000065673	Tor1aip2-002	3PRIME_UTR	<0.1			Torsin-1A-interacting protein 2 [Source:UniProtKB/Swiss-Prot;Acc:Q8BYU6]		NULL	TRUE
Tir3b-F12	NES15830346	1	157912711	C/T	CC				ENSMUSG00000050565	ENSMUST00000060404	Tor1aip2-001	3PRIME_UTR	<0.1			Torsin-1A-interacting protein 2 [Source:UniProtKB/Swiss-Prot;Acc:Q8BYU6]		NULL	TRUE
Tir3b-F12	NES15830346	1	157912711	C/T	CC				ENSMUSG00000050565	ENSMUST00000111757	Tor1aip2-004	3PRIME_UTR	<0.1			Torsin-1A-interacting protein 2 [Source:UniProtKB/Swiss-Prot;Acc:Q8BYU6]		NULL	TRUE
Tir3b-F12	NES15830349	1	157912967	A/G	AA	GG	GG	GG	ENSMUSG00000050565	ENSMUST00000065673	Tor1aip2-002	DOWNSTREAM	<0.1			Torsin-1A-interacting protein 2 [Source:UniProtKB/Swiss-Prot;Acc:Q8BYU6]		NULL	TRUE
Tir3b-F12	NES15830349	1	157912967	A/G	AA	GG	GG	GG	ENSMUSG00000050565	ENSMUST00000060404	Tor1aip2-001	3PRIME_UTR	<0.1			Torsin-1A-interacting protein 2 [Source:UniProtKB/Swiss-Prot;Acc:Q8BYU6]		NULL	TRUE
Tir3b-F12	NES15830349	1	157912967	A/G	AA	GG	GG	GG	ENSMUSG00000050565	ENSMUST00000111757	Tor1aip2-004	3PRIME_UTR	<0.1			Torsin-1A-interacting protein 2 [Source:UniProtKB/Swiss-Prot;Acc:Q8BYU6]		NULL	TRUE
Tir3b-F12	NES15830350	1	157912997	A/G	AA	GG	GG	GG	ENSMUSG00000050565	ENSMUST00000065673	Tor1aip2-002	DOWNSTREAM	<0.1			Torsin-1A-interacting protein 2 [Source:UniProtKB/Swiss-Prot;Acc:Q8BYU6]		NULL	TRUE
Tir3b-F12	NES15830350	1	157912997	A/G	AA	GG	GG	GG	ENSMUSG00000050565	ENSMUST00000060404	Tor1aip2-001	3PRIME_UTR	<0.1			Torsin-1A-interacting protein 2 [Source:UniProtKB/Swiss-Prot;Acc:Q8BYU6]		NULL	TRUE
Tir3b-F12	NES15830350	1	157912997	A/G	AA	GG	GG	GG	ENSMUSG00000050565	ENSMUST00000111757	Tor1aip2-004	3PRIME_UTR	<0.1			Torsin-1A-interacting protein 2 [Source:UniProtKB/Swiss-Prot;Acc:Q8BYU6]		NULL	TRUE
Tir3b-F12	NES15830293	1	157913183	C/T	CC	TT	TT	TT	ENSMUSG00000050565	ENSMUST00000065673	Tor1aip2-002	DOWNSTREAM	0.559			Torsin-1A-interacting protein 2 [Source:UniProtKB/Swiss-Prot;Acc:Q8BYU6]		NULL	TRUE
Tir3b-F12	NES15830293	1	157913183	C/T	CC	TT	TT	TT	ENSMUSG00000050565	ENSMUST00000060404	Tor1aip2-001	3PRIME_UTR	0.559			Torsin-1A-interacting protein 2 [Source:UniProtKB/Swiss-Prot;Acc:Q8BYU6]		NULL	TRUE
Tir3b-F12	NES15830293	1	157913183	C/T	CC	TT	TT	TT	ENSMUSG00000050565	ENSMUST00000111757	Tor1aip2-004	3PRIME_UTR	0.559			Torsin-1A-interacting protein 2 [Source:UniProtKB/Swiss-Prot;Acc:Q8BYU6]		NULL	TRUE
Tir3b-F12	NES15830294	1	157913330	C/T	CC	TT	TT	TT	ENSMUSG00000050565	ENSMUST00000065673	Tor1aip2-002	DOWNSTREAM	0.198			Torsin-1A-interacting protein 2 [Source:UniProtKB/Swiss-Prot;Acc:Q8BYU6]		NULL	TRUE
Tir3b-F12	NES15830294	1	157913330	C/T	CC	TT	TT	TT	ENSMUSG00000050565	ENSMUST00000060404	Tor1aip2-001	3PRIME_UTR	0.198			Torsin-1A-interacting protein 2 [Source:UniProtKB/Swiss-Prot;Acc:Q8BYU6]		NULL	TRUE
Tir3b-F12	NES15830294	1	157913330	C/T	CC	TT	TT	TT	ENSMUSG00000050565	ENSMUST00000111757	Tor1aip2-004	3PRIME_UTR	0.198			Torsin-1A-interacting protein 2 [Source:UniProtKB/Swiss-Prot;Acc:Q8BYU6]		NULL	TRUE
Tir3b-F12	NES15830295	1	157913570	T/C	TT	CC	CC	CC	ENSMUSG00000050565	ENSMUST00000065673	Tor1aip2-002	DOWNSTREAM	<0.1			Torsin-1A-interacting protein 2 [Source:UniProtKB/Swiss-Prot;Acc:Q8BYU6]		NULL	TRUE
Tir3b-F12	NES15830295	1	157913570	T/C	TT	CC	CC	CC	ENSMUSG00000050565	ENSMUST00000060404	Tor1aip2-001	3PRIME_UTR	<0.1			Torsin-1A-interacting protein 2 [Source:UniProtKB/Swiss-Prot;Acc:Q8BYU6]		NULL	TRUE
Tir3b-F12	NES15830295	1	157913570	T/C	TT	CC	CC	CC	ENSMUSG00000050565	ENSMUST00000111757	Tor1aip2-004	3PRIME_UTR	<0.1			Torsin-1A-interacting protein 2 [Source:UniProtKB/Swiss-Prot;Acc:Q8BYU6]		NULL	TRUE
Tir3b-F12	NES15830296	1	157913642	T/C	TT	CC	CC	CC	ENSMUSG00000050565	ENSMUST00000065673	Tor1aip2-002	DOWNSTREAM	<0.1			Torsin-1A-interacting protein 2 [Source:UniProtKB/Swiss-Prot;Acc:Q8BYU6]		NULL	TRUE
Tir3b-F12	NES15830296	1	157913642	T/C	TT	CC	CC	CC	ENSMUSG00000050565	ENSMUST00000060404	Tor1aip2-001	3PRIME_UTR	<0.1			Torsin-1A-interacting protein 2 [Source:UniProtKB/Swiss-Prot;Acc:Q8BYU6]		NULL	TRUE
Tir3b-F12	NES15830296	1	157913642	T/C	TT	CC	CC	CC	ENSMUSG00000050565	ENSMUST00000111757	Tor1aip2-004	3PRIME_UTR	<0.1			Torsin-1A-interacting protein 2 [Source:UniProtKB/Swiss-Prot;Acc:Q8BYU6]		NULL	TRUE
Tir3b-F12	NES15830297	1	157913648	C/T	CC	TT	TT	TT	ENSMUSG00000050565	ENSMUST00000065673	Tor1aip2-002	DOWNSTREAM	<0.1			Torsin-1A-interacting protein 2 [Source:UniProtKB/Swiss-Prot;Acc:Q8BYU6]		NULL	TRUE
Tir3b-F12	NES15830297	1	157913648	C/T	CC	TT	TT	TT	ENSMUSG00000050565	ENSMUST00000060404	Tor1aip2-001	3PRIME_UTR	<0.1			Torsin-1A-interacting protein 2 [Source:UniProtKB/Swiss-Prot;Acc:Q8BYU6]		NULL	TRUE
Tir3b-F12	NES15830297	1	157913648	C/T	CC	TT	TT	TT	ENSMUSG00000050565	ENSMUST00000111757	Tor1aip2-004	3PRIME_UTR	<0.1			Torsin-1A-interacting protein 2 [Source:UniProtKB/Swiss-Prot;Acc:Q8BYU6]		NULL	TRUE
Tir3b-F12	NES15830298	1	157913682	G/T	GG	TT	TT	TT	ENSMUSG00000050565	ENSMUST00000065673	Tor1aip2-002	DOWNSTREAM	<0.1			Torsin-1A-interacting protein 2 [Source:UniProtKB/Swiss-Prot;Acc:Q8BYU6]		NULL	TRUE
Tir3b-F12	NES15830298	1	157913682	G/T	GG	TT	TT	TT	ENSMUSG00000050565	ENSMUST00000060404	Tor1aip2-001	3PRIME_UTR	<0.1			Torsin-1A-interacting protein 2 [Source:UniProtKB/Swiss-Prot;Acc:Q8BYU6]		NULL	TRUE
Tir3b-F12	NES15830298	1	157913682	G/T	GG	TT	TT	TT	ENSMUSG00000050565	ENSMUST00000111757	Tor1aip2-004	3PRIME_UTR	<0.1			Torsin-1A-interacting protein 2 [Source:UniProtKB/Swiss-Prot;Acc:Q8BYU6]		NULL	TRUE
Tir3b-F12	NES15830299	1	157913752	C/T	CC	TT	TT	TT	ENSMUSG00000050565	ENSMUST00000065673	Tor1aip2-002	DOWNSTREAM	<0.1			Torsin-1A-interacting protein 2 [Source:UniProtKB/Swiss-Prot;Acc:Q8BYU6]		NULL	TRUE
Tir3b-F12	NES15830299	1	157913752	C/T	CC	TT	TT	TT	ENSMUSG00000050565	ENSMUST00000060404	Tor1aip2-001	3PRIME_UTR	<0.1			Torsin-1A-interacting protein 2 [Source:UniProtKB/Swiss-Prot;Acc:Q8BYU6]		NULL	TRUE
Tir3b-F12	NES15830299	1	157913752	C/T	CC	TT	TT	TT	ENSMUSG00000050565	ENSMUST00000111757	Tor1aip2-004	3PRIME_UTR	<0.1			Torsin-1A-interacting protein 2 [Source:UniProtKB/Swiss-Prot;Acc:Q8BYU6]		NULL	TRUE
Tir3b-F12	NES15830602	1	157898466	G/A	GG	AA	AA	AA	ENSMUSG00000050565	ENSMUST00000065673	Tor1aip2-002	5PRIME_UTR	0.168			Torsin-1A-interacting protein 2 [Source:UniProtKB/Swiss-Prot;Acc:Q8BYU6]		NULL	TRUE
Tir3b-F12	NES15830602	1	157898466	G/A	GG	AA	AA	AA	ENSMUSG00000079252	ENSMUST00000111754	Ifrg15-004	5PRIME_UTR	0.168			interferon alpha responsive [Source:RefSeq peptide;Acc:NP_071724]		NULL	TRUE
Tir3b-F12	NES15830602	1	157898466	G/A	GG	AA	AA	AA	ENSMUSG00000050565	ENSMUST00000060404	Tor1aip2-001	INTRONIC	0.168			Torsin-1A-interacting protein 2 [Source:UniProtKB/Swiss-Prot;Acc:Q8BYU6]		NULL	TRUE
Tir3b-F12	NES15830602	1	157898466	G/A	GG	AA	AA	AA	ENSMUSG00000079252	ENSMUST00000065648	Ifrg15-001	5PRIME_UTR	0.168			interferon alpha responsive [Source:RefSeq peptide;Acc:NP_071724]		NULL	TRUE
Tir3b-F12	NES15830602	1	157898466	G/A	GG	AA	AA	AA	ENSMUSG00000079252	ENSMUST00000097526	Ifrg15-002	5PRIME_UTR	0.168			interferon alpha responsive [Source:RefSeq peptide;Acc:NP_071724]		NULL	TRUE
Tir3b-F12	NES15830602	1	157898466	G/A	GG	AA	AA	AA	ENSMUSG00000050565	ENSMUST00000111757	Tor1aip2-004	UPSTREAM	0.168			Torsin-1A-interacting protein 2 [Source:UniProtKB/Swiss-Prot;Acc:Q8BYU6]		NULL	TRUE
Tir3b-F12	NES15830605	1	157898687	C/A	CC	AA	AA	AA	ENSMUSG00000050565	ENSMUST00000065673	Tor1aip2-002	5PRIME_UTR	<0.1			Torsin-1A-interacting protein 2 [Source:UniProtKB/Swiss-Prot;Acc:Q8BYU6]		NULL	TRUE
Tir3b-F12	NES15830605	1	157898687	C/A	CC	AA	AA	AA	ENSMUSG00000079252	ENSMUST00000111754	Ifrg15-004	5PRIME_UTR	<0.1			interferon alpha responsive [Source:RefSeq peptide;Acc:NP_071724]		NULL	TRUE
Tir3b-F12	NES15830605	1	157898687	C/A	CC	AA	AA	AA	ENSMUSG00000050565	ENSMUST00000060404	Tor1aip2-001	INTRONIC	<0.1			Torsin-1A-interacting protein 2 [Source:UniProtKB/Swiss-Prot;Acc:Q8BYU6]		NULL	TRUE
Tir3b-F12	NES15830605	1	157898687	C/A	CC	AA	AA	AA	ENSMUSG00000079252	ENSMUST00000065648	Ifrg15-001	5PRIME_UTR	<0.1			interferon alpha responsive [Source:RefSeq peptide;Acc:NP_071724]		NULL	TRUE
Tir3b-F12	NES15830605	1	157898687	C/A	CC	AA	AA	AA	ENSMUSG00000079252	ENSMUST00000097526	Ifrg15-002	5PRIME_UTR	<0.1			interferon alpha responsive [Source:RefSeq peptide;Acc:NP_071724]		NULL	TRUE
Tir3b-F12	NES15830605	1	157898687	C/A	CC	AA	AA	AA	ENSMUSG00000050565	ENSMUST00000111757	Tor1aip2-004	UPSTREAM	<0.1			Torsin-1A-interacting protein 2 [Source:UniProtKB/Swiss-Prot;Acc:Q8BYU6]		NULL	TRUE
Tir3b-F12	NES15830339	1	157912175	G/A	GG	AA	AA	AA	ENSMUSG00000050565	ENSMUST00000065673	Tor1aip2-002	NON_SYNONYMOUS_CODING	<0.1	benign	1.152	Torsin-1A-interacting protein 2 [Source:UniProtKB/Swiss-Prot;Acc:Q8BYU6]		366	TRUE
Tir3b-F12	NES15830339	1	157912175	G/A	GG	AA	AA	AA	ENSMUSG00000050565	ENSMUST00000060404	Tor1aip2-001	NON_SYNONYMOUS_CODING	<0.1	benign	1.152	Torsin-1A-interacting protein 2 [Source:UniProtKB/Swiss-Prot;Acc:Q8BYU6]		366	TRUE
Tir3b-F12	NES15830339	1	157912175	G/A	GG	AA	AA	AA	ENSMUSG00000050565	ENSMUST00000111757	Tor1aip2-004	NON_SYNONYMOUS_CODING	<0.1	benign	1.152	Torsin-1A-interacting protein 2 [Source:UniProtKB/Swiss-Prot;Acc:Q8BYU6]		366	TRUE
Tir3b-F12	NES15830340	1	157912291	C/G	CC	GG	GG	GG	ENSMUSG00000050565	ENSMUST00000065673	Tor1aip2-002	SYNONYMOUS_CODING	0.907			Torsin-1A-interacting protein 2 [Source:UniProtKB/Swiss-Prot;Acc:Q8BYU6]		NULL	TRUE
Tir3b-F12	NES15830340	1	157912291	C/G	CC	GG	GG	GG	ENSMUSG00000050565	ENSMUST00000060404	Tor1aip2-001	SYNONYMOUS_CODING	0.907			Torsin-1A-interacting protein 2 [Source:UniProtKB/Swiss-Prot;Acc:Q8BYU6]		NULL	TRUE
Tir3b-F12	NES15830340	1	157912291	C/G	CC	GG	GG	GG	ENSMUSG00000050565	ENSMUST00000111757	Tor1aip2-004	SYNONYMOUS_CODING	0.907			Torsin-1A-interacting protein 2 [Source:UniProtKB/Swiss-Prot;Acc:Q8BYU6]		NULL	TRUE
Tir3b-F12	NES15830341	1	157912336	C/T	CC	TT	TT	TT	ENSMUSG00000050565	ENSMUST00000065673	Tor1aip2-002	SYNONYMOUS_CODING	0.995			Torsin-1A-interacting protein 2 [Source:UniProtKB/Swiss-Prot;Acc:Q8BYU6]		NULL	TRUE
Tir3b-F12	NES15830341	1	157912336	C/T	CC	TT	TT	TT	ENSMUSG00000050565	ENSMUST00000060404	Tor1aip2-001	SYNONYMOUS_CODING	0.995			Torsin-1A-interacting protein 2 [Source:UniProtKB/Swiss-Prot;Acc:Q8BYU6]		NULL	TRUE
Tir3b-F12	NES15830341	1	157912336	C/T	CC	TT	TT	TT	ENSMUSG00000050565	ENSMUST00000111757	Tor1aip2-004	SYNONYMOUS_CODING	0.995			Torsin-1A-interacting protein 2 [Source:UniProtKB/Swiss-Prot;Acc:Q8BYU6]		NULL	TRUE
Tir3b-F12	NES15830342	1	157912366	A/C	AA	CC	CC	CC	ENSMUSG00000050565	ENSMUST00000065673	Tor1aip2-002	SYNONYMOUS_CODING	<0.1			Torsin-1A-interacting protein 2 [Source:UniProtKB/Swiss-Prot;Acc:Q8BYU6]		NULL	TRUE
Tir3b-F12	NES15830342	1	157912366	A/C	AA	CC	CC	CC	ENSMUSG00000050565	ENSMUST00000060404	Tor1aip2-001	SYNONYMOUS_CODING	<0.1			Torsin-1A-interacting protein 2 [Source:UniProtKB/Swiss-Prot;Acc:Q8BYU6]		NULL	TRUE
Tir3b-F12	NES15830342	1	157912366	A/C	AA	CC	CC	CC	ENSMUSG00000050565	ENSMUST00000111757	Tor1aip2-004	SYNONYMOUS_CODING	<0.1			Torsin-1A-interacting protein 2 [Source:UniProtKB/Swiss-Prot;Acc:Q8BYU6]		NULL	TRUE
Tir3b-F12	NES15830343	1	157912483	C/T	CC			TT	ENSMUSG00000050565	ENSMUST00000065673	Tor1aip2-002	SYNONYMOUS_CODING	1			Torsin-1A-interacting protein 2 [Source:UniProtKB/Swiss-Prot;Acc:Q8BYU6]		NULL	TRUE
Tir3b-F12	NES15830343	1	157912483	C/T	CC			TT	ENSMUSG00000050565	ENSMUST00000060404	Tor1aip2-001	SYNONYMOUS_CODING	1			Torsin-1A-interacting protein 2 [Source:UniProtKB/Swiss-Prot;Acc:Q8BYU6]		NULL	TRUE
Tir3b-F12	NES15830343	1	157912483	C/T	CC			TT	ENSMUSG00000050565	ENSMUST00000111757	Tor1aip2-004	SYNONYMOUS_CODING	1			Torsin-1A-interacting protein 2 [Source:UniProtKB/Swiss-Prot;Acc:Q8BYU6]		NULL	TRUE
Tir3b-F12	NES15830344	1	157912639	G/A	GG	AA	AA	AA	ENSMUSG00000050565	ENSMUST00000065673	Tor1aip2-002	3PRIME_UTR	<0.1			Torsin-1A-interacting protein 2 [Source:UniProtKB/Swiss-Prot;Acc:Q8BYU6]		NULL	TRUE
Tir3b-F12	NES15830344	1	157912639	G/A	GG	AA	AA	AA	ENSMUSG00000050565	ENSMUST00000060404	Tor1aip2-001	3PRIME_UTR	<0.1			Torsin-1A-interacting protein 2 [Source:UniProtKB/Swiss-Prot;Acc:Q8BYU6]		NULL	TRUE
Tir3b-F12	NES15830344	1	157912639	G/A	GG	AA	AA	AA	ENSMUSG00000050565	ENSMUST00000111757	Tor1aip2-004	3PRIME_UTR	<0.1			Torsin-1A-interacting protein 2 [Source:UniProtKB/Swiss-Prot;Acc:Q8BYU6]		NULL	TRUE
Tir3b-F12	NES15830345	1	157912681	C/T	CC	TT	TT	TT	ENSMUSG00000050565	ENSMUST00000065673	Tor1aip2-002	3PRIME_UTR	<0.1			Torsin-1A-interacting protein 2 [Source:UniProtKB/Swiss-Prot;Acc:Q8BYU6]		NULL	TRUE
Tir3b-F12	NES15830345	1	157912681	C/T	CC	TT	TT	TT	ENSMUSG00000050565	ENSMUST00000060404	Tor1aip2-001	3PRIME_UTR	<0.1			Torsin-1A-interacting protein 2 [Source:UniProtKB/Swiss-Prot;Acc:Q8BYU6]		NULL	TRUE
Tir3b-F12	NES15830345	1	157912681	C/T	CC	TT	TT	TT	ENSMUSG00000050565	ENSMUST00000111757	Tor1aip2-004	3PRIME_UTR	<0.1			Torsin-1A-interacting protein 2 [Source:UniProtKB/Swiss-Prot;Acc:Q8BYU6]		NULL	TRUE
Tir3b-F12	NES15830346	1	157912711	C/T	CC				ENSMUSG00000050565	ENSMUST00000065673	Tor1aip2-002	3PRIME_UTR	<0.1			Torsin-1A-interacting protein 2 [Source:UniProtKB/Swiss-Prot;Acc:Q8BYU6]		NULL	TRUE
Tir3b-F12	NES15830346	1	157912711	C/T	CC				ENSMUSG00000050565	ENSMUST00000060404	Tor1aip2-001	3PRIME_UTR	<0.1			Torsin-1A-interacting protein 2 [Source:UniProtKB/Swiss-Prot;Acc:Q8BYU6]		NULL	TRUE
Tir3b-F12	NES15830346	1	157912711	C/T	CC				ENSMUSG00000050565	ENSMUST00000111757	Tor1aip2-004	3PRIME_UTR	<0.1			Torsin-1A-interacting protein 2 [Source:UniProtKB/Swiss-Prot;Acc:Q8BYU6]		NULL	TRUE
Tir3b-F12	NES15830339	1	157912175	G/A	GG	AA	AA	AA	ENSMUSG00000050565	ENSMUST00000065673	Tor1aip2-002	NON_SYNONYMOUS_CODING	<0.1	benign	1.152	Torsin-1A-interacting protein 2 [Source:UniProtKB/Swiss-Prot;Acc:Q8BYU6]		366	TRUE
Tir3b-F12	NES15830339	1	157912175	G/A	GG	AA	AA	AA	ENSMUSG00000050565	ENSMUST00000060404	Tor1aip2-001	NON_SYNONYMOUS_CODING	<0.1	benign	1.152	Torsin-1A-interacting protein 2 [Source:UniProtKB/Swiss-Prot;Acc:Q8BYU6]		366	TRUE
Tir3b-F12	NES15830339	1	157912175	G/A	GG	AA	AA	AA	ENSMUSG00000050565	ENSMUST00000111757	Tor1aip2-004	NON_SYNONYMOUS_CODING	<0.1	benign	1.152	Torsin-1A-interacting protein 2 [Source:UniProtKB/Swiss-Prot;Acc:Q8BYU6]		366	TRUE
Tir3b-F12	NES15830340	1	157912291	C/G	CC	GG	GG	GG	ENSMUSG00000050565	ENSMUST00000065673	Tor1aip2-002	SYNONYMOUS_CODING	0.907			Torsin-1A-interacting protein 2 [Source:UniProtKB/Swiss-Prot;Acc:Q8BYU6]		NULL	TRUE
Tir3b-F12	NES15830340	1	157912291	C/G	CC	GG	GG	GG	ENSMUSG00000050565	ENSMUST00000060404	Tor1aip2-001	SYNONYMOUS_CODING	0.907			Torsin-1A-interacting protein 2 [Source:UniProtKB/Swiss-Prot;Acc:Q8BYU6]		NULL	TRUE
Tir3b-F12	NES15830340	1	157912291	C/G	CC	GG	GG	GG	ENSMUSG00000050565	ENSMUST00000111757	Tor1aip2-004	SYNONYMOUS_CODING	0.907			Torsin-1A-interacting protein 2 [Source:UniProtKB/Swiss-Prot;Acc:Q8BYU6]		NULL	TRUE
Tir3b-F12	NES15830341	1	157912336	C/T	CC	TT	TT	TT	ENSMUSG00000050565	ENSMUST00000065673	Tor1aip2-002	SYNONYMOUS_CODING	0.995			Torsin-1A-interacting protein 2 [Source:UniProtKB/Swiss-Prot;Acc:Q8BYU6]		NULL	TRUE
Tir3b-F12	NES15830341	1	157912336	C/T	CC	TT	TT	TT	ENSMUSG00000050565	ENSMUST00000060404	Tor1aip2-001	SYNONYMOUS_CODING	0.995			Torsin-1A-interacting protein 2 [Source:UniProtKB/Swiss-Prot;Acc:Q8BYU6]		NULL	TRUE
Tir3b-F12	NES15830341	1	157912336	C/T	CC	TT	TT	TT	ENSMUSG00000050565	ENSMUST00000111757	Tor1aip2-004	SYNONYMOUS_CODING	0.995			Torsin-1A-interacting protein 2 [Source:UniProtKB/Swiss-Prot;Acc:Q8BYU6]		NULL	TRUE
Tir3b-F12	NES15830342	1	157912366	A/C	AA	CC	CC	CC	ENSMUSG00000050565	ENSMUST00000065673	Tor1aip2-002	SYNONYMOUS_CODING	<0.1			Torsin-1A-interacting protein 2 [Source:UniProtKB/Swiss-Prot;Acc:Q8BYU6]		NULL	TRUE
Tir3b-F12	NES15830342	1	157912366	A/C	AA	CC	CC	CC	ENSMUSG00000050565	ENSMUST00000060404	Tor1aip2-001	SYNONYMOUS_CODING	<0.1			Torsin-1A-interacting protein 2 [Source:UniProtKB/Swiss-Prot;Acc:Q8BYU6]		NULL	TRUE
Tir3b-F12	NES15830342	1	157912366	A/C	AA	CC	CC	CC	ENSMUSG00000050565	ENSMUST00000111757	Tor1aip2-004	SYNONYMOUS_CODING	<0.1			Torsin-1A-interacting protein 2 [Source:UniProtKB/Swiss-Prot;Acc:Q8BYU6]		NULL	TRUE
Tir3b-F12	NES15830343	1	157912483	C/T	CC			TT	ENSMUSG00000050565	ENSMUST00000065673	Tor1aip2-002	SYNONYMOUS_CODING	1			Torsin-1A-interacting protein 2 [Source:UniProtKB/Swiss-Prot;Acc:Q8BYU6]		NULL	TRUE
Tir3b-F12	NES15830343	1	157912483	C/T	CC			TT	ENSMUSG00000050565	ENSMUST00000060404	Tor1aip2-001	SYNONYMOUS_CODING	1			Torsin-1A-interacting protein 2 [Source:UniProtKB/Swiss-Prot;Acc:Q8BYU6]		NULL	TRUE
Tir3b-F12	NES15830343	1	157912483	C/T	CC			TT	ENSMUSG00000050565	ENSMUST00000111757	Tor1aip2-004	SYNONYMOUS_CODING	1			Torsin-1A-interacting protein 2 [Source:UniProtKB/Swiss-Prot;Acc:Q8BYU6]		NULL	TRUE
Tir3b-F12	NES15830344	1	157912639	G/A	GG	AA	AA	AA	ENSMUSG00000050565	ENSMUST00000065673	Tor1aip2-002	3PRIME_UTR	<0.1			Torsin-1A-interacting protein 2 [Source:UniProtKB/Swiss-Prot;Acc:Q8BYU6]		NULL	TRUE
Tir3b-F12	NES15830344	1	157912639	G/A	GG	AA	AA	AA	ENSMUSG00000050565	ENSMUST00000060404	Tor1aip2-001	3PRIME_UTR	<0.1			Torsin-1A-interacting protein 2 [Source:UniProtKB/Swiss-Prot;Acc:Q8BYU6]		NULL	TRUE
Tir3b-F12	NES15830344	1	157912639	G/A	GG	AA	AA	AA	ENSMUSG00000050565	ENSMUST00000111757	Tor1aip2-004	3PRIME_UTR	<0.1			Torsin-1A-interacting protein 2 [Source:UniProtKB/Swiss-Prot;Acc:Q8BYU6]		NULL	TRUE
Tir3b-F12	NES15830345	1	157912681	C/T	CC	TT	TT	TT	ENSMUSG00000050565	ENSMUST00000065673	Tor1aip2-002	3PRIME_UTR	<0.1			Torsin-1A-interacting protein 2 [Source:UniProtKB/Swiss-Prot;Acc:Q8BYU6]		NULL	TRUE
Tir3b-F12	NES15830345	1	157912681	C/T	CC	TT	TT	TT	ENSMUSG00000050565	ENSMUST00000060404	Tor1aip2-001	3PRIME_UTR	<0.1			Torsin-1A-interacting protein 2 [Source:UniProtKB/Swiss-Prot;Acc:Q8BYU6]		NULL	TRUE
Tir3b-F12	NES15830345	1	157912681	C/T	CC	TT	TT	TT	ENSMUSG00000050565	ENSMUST00000111757	Tor1aip2-004	3PRIME_UTR	<0.1			Torsin-1A-interacting protein 2 [Source:UniProtKB/Swiss-Prot;Acc:Q8BYU6]		NULL	TRUE
Tir3b-F12	NES15830346	1	157912711	C/T	CC				ENSMUSG00000050565	ENSMUST00000065673	Tor1aip2-002	3PRIME_UTR	<0.1			Torsin-1A-interacting protein 2 [Source:UniProtKB/Swiss-Prot;Acc:Q8BYU6]		NULL	TRUE
Tir3b-F12	NES15830346	1	157912711	C/T	CC				ENSMUSG00000050565	ENSMUST00000060404	Tor1aip2-001	3PRIME_UTR	<0.1			Torsin-1A-interacting protein 2 [Source:UniProtKB/Swiss-Prot;Acc:Q8BYU6]		NULL	TRUE
Tir3b-F12	NES15830346	1	157912711	C/T	CC				ENSMUSG00000050565	ENSMUST00000111757	Tor1aip2-004	3PRIME_UTR	<0.1			Torsin-1A-interacting protein 2 [Source:UniProtKB/Swiss-Prot;Acc:Q8BYU6]		NULL	TRUE
[truncated: 4,479 more rows]
